# Supplementary material
Source: publisher figshare collection journal article supplement (https://gsajournals.figshare.com/ndownloader/files/26842985)
Supplement: Supplementary file 1 [file 26842985]

Env	Hybrid	Ear_Height_cm_BLUE	Ear_Height_cm_weight	Grain_Moisture_BLUE	Grain_Moisture_weight	Lodging_BLUE	Lodging_weight	Plant_Height_cm_BLUE	Plant_Height_cm_weight	Pollen_DAP_BLUE	Pollen_DAP_weight	Silk_DAP_BLUE	Silk_DAP_weight	Twt_kg_m3_BLUE	Twt_kg_m3_weight	Yield_Mg_ha_BLUE	Yield_Mg_ha_weight
ARH1_2016	(CML442-B/CML343-B-B-B-B-B-B)-B-B-1-1-B-B-B-1-B12-1-B19/LH19	120	0.0129659791262199	21.4	0.652144003668883	0.0174419	3866.12841337487	185.5	0.011755338691024	75	1.9153194765204	77	1.45192588269624	NA	NA	7.9392	2.02213075397473
ARH1_2016	(CML450-B/TX110)-B-3-B-1-B-B-1-1-B18-B21-B8/LH195	89.6925	0.00648329511251254	21.5	0.652144003668883	0.0128205	3866.12841337487	188.1996	0.00587788434617943	75	1.9153194765204	79	1.45192588269624	NA	NA	7.679	2.01847941690581
ARH1_2016	2369/3IIH6	98.5	0.0129659791262199	15.5	0.652144003668883	1.238701e-17	3866.12841337487	181	0.011755338691024	68	1.9153194765204	69.5	1.45192588269624	NA	NA	9.844	2.02588351707335
ARH1_2016	2369/LH123HT	109.5	0.0129659791262199	18.4	0.652144003668883	0.00625	3866.12841337487	208	0.011755338691024	68.5	1.9153194765204	71	1.45192588269624	NA	NA	10.0279	2.02791203766719
ARH1_2016	2369/PHZ51	112	0.0129659791262199	17.5	0.652144003668883	0.004902	3866.12841337487	180.5	0.011755338691024	69.5	1.9153194765204	72	1.45192588269624	NA	NA	8.1339	2.00052700965028
ARH1_2016	2FACC/3IIH6	101	0.0129659791262199	14.3	0.652144003668883	1.2359905e-17	3866.12841337487	186.5	0.011755338691024	67	1.9153194765204	67	1.45192588269624	NA	NA	7.9396	2.02213075397473
ARH1_2016	4N506/3IIH6	111	0.0129659791262199	17.2	0.652144003668883	1.2359905e-17	3866.12841337487	181.5	0.011755338691024	67	1.9153194765204	69	1.45192588269624	NA	NA	7.9772	2.02152219779658
ARH1_2016	6F629/3IIH6	111.5	0.0129659791262199	16	0.652144003668883	0.0052632	3866.12841337487	187.5	0.011755338691024	68	1.9153194765204	68	1.45192588269624	NA	NA	9.3706	2.0212179197075
ARH1_2016	78010/3IIH6	123	0.0129659791262199	14.65	0.652144003668883	0.0159273	3866.12841337487	177.5	0.011755338691024	67	1.9153194765204	68	1.45192588269624	NA	NA	7.6838	2.01462522777751
ARH1_2016	A632/3IIH6	112.5	0.0129659791262199	14.3	0.652144003668883	0.0340909	3866.12841337487	189	0.011755338691024	68	1.9153194765204	69	1.45192588269624	NA	NA	7.4308	2.02811488972658
ARH1_2016	A634/3IIH6	113	0.0129659791262199	14.4	0.652144003668883	1.2393786e-17	3866.12841337487	175	0.011755338691024	67	1.9153194765204	68	1.45192588269624	NA	NA	5.6393	2.02841916781565
ARH1_2016	A635/3IIH6	104	0.0129659791262199	14.55	0.652144003668883	0.0119048	3866.12841337487	190.5	0.011755338691024	67	1.9153194765204	68	1.45192588269624	NA	NA	7.2099	2.02811488972658
ARH1_2016	A679/3IIH6	127	0.0129659791262199	14.45	0.652144003668883	1.2393786e-17	3866.12841337487	190.5	0.011755338691024	67	1.9153194765204	68	1.45192588269624	NA	NA	7.1388	2.02841916781565
ARH1_2016	A680/3IIH6	120	0.0129659791262199	14.65	0.652144003668883	0.0065789	3866.12841337487	183	0.011755338691024	68	1.9153194765204	69.5	1.45192588269624	NA	NA	8.6998	2.02831774178596
ARH1_2016	B104/3IIH6	100.5	0.0129659791262199	16.25	0.652144003668883	0.0126582	3866.12841337487	177	0.011755338691024	68	1.9153194765204	69.5	1.45192588269624	NA	NA	8.3978	2.01087246467889
ARH1_2016	B105/3IIH6	100	0.0129659791262199	15.4	0.652144003668883	0.0491071	3866.12841337487	169.5	0.011755338691024	68	1.9153194765204	69.5	1.45192588269624	NA	NA	6.691	2.02852059384535
ARH1_2016	B109/3IIH6	108.5	0.0129659791262199	15.75	0.652144003668883	0.0297619	3866.12841337487	159.5	0.011755338691024	67	1.9153194765204	69	1.45192588269624	NA	NA	6.3293	2.02466640471704
ARH1_2016	B110/3IIH6	117.5	0.0129659791262199	15.55	0.652144003668883	0.0147059	3866.12841337487	176.5	0.011755338691024	68	1.9153194765204	69.5	1.45192588269624	NA	NA	7.1933	2.01959510323243
ARH1_2016	B111/3IIH6	124.5	0.0129659791262199	15.7	0.652144003668883	0.0440473	3866.12841337487	190	0.011755338691024	69.5	1.9153194765204	70.5	1.45192588269624	NA	NA	8.3721	2.01817513881674
ARH1_2016	B119/3IIH6	107.5	0.0129659791262199	15.4	0.652144003668883	0.010101	3866.12841337487	177.5	0.011755338691024	68	1.9153194765204	69	1.45192588269624	NA	NA	9.287	2.00052700965028
ARH1_2016	B14/3IIH6	110.5	0.0129659791262199	15.95	0.652144003668883	1.2414115e-17	3866.12841337487	200.5	0.011755338691024	68	1.9153194765204	69.5	1.45192588269624	NA	NA	7.4727	2.02841916781565
ARH1_2016	B14A/H95	111.5	0.0129659791262199	17.8	0.652144003668883	0.0157895	3866.12841337487	181.5	0.011755338691024	70	1.9153194765204	72.5	1.45192588269624	NA	NA	7.774	2.00742397966936
ARH1_2016	B14A/MO17	127	0.0129659791262199	16.5	0.652144003668883	0.0555556	3866.12841337487	204.5	0.011755338691024	69	1.9153194765204	70	1.45192588269624	NA	NA	8.7609	2.02841916781565
ARH1_2016	B14A/OH43	118	0.0129659791262199	18.75	0.652144003668883	0.0365854	3866.12841337487	194	0.011755338691024	69	1.9153194765204	71.5083	0.725987379632332	NA	NA	7.3493	2.02811488972658
ARH1_2016	B2/3IIH6	116.5	0.0129659791262199	15.1	0.652144003668883	0.0063291	3866.12841337487	189.5	0.011755338691024	71	1.9153194765204	74	1.45192588269624	NA	NA	5.7642	2.0173637305792
ARH1_2016	B37/H95	104	0.0129659791262199	17.4	0.652144003668883	0.0268817	3866.12841337487	187.5	0.011755338691024	69	1.9153194765204	71	1.45192588269624	NA	NA	6.9752	2.01929082514335
ARH1_2016	B37/MO17	112.5	0.0129659791262199	16.4	0.652144003668883	1.2414115e-17	3866.12841337487	188	0.011755338691024	67	1.9153194765204	70.5	1.45192588269624	NA	NA	7.9591	2.0094525002632
ARH1_2016	B37/OH43	105.5	0.0129659791262199	17.35	0.652144003668883	0.0600258	3866.12841337487	188.5	0.011755338691024	68	1.9153194765204	70.5	1.45192588269624	NA	NA	8.1007	2.02831774178596
ARH1_2016	B47/3IIH6	114.5	0.0129659791262199	15.15	0.652144003668883	0.0661765	3866.12841337487	175.5	0.011755338691024	67	1.9153194765204	68	1.45192588269624	NA	NA	6.544	2.02841916781565
ARH1_2016	B47/PHZ51	111	0.0129659791262199	15.45	0.652144003668883	1.2414115e-17	3866.12841337487	182	0.011755338691024	68	1.9153194765204	69	1.45192588269624	NA	NA	7.4966	2.02811488972658
ARH1_2016	B73/3IIH6	115.5	0.0129659791262199	15.15	0.652144003668883	1.2210827e-17	3866.12841337487	175.5	0.011755338691024	67	1.9153194765204	69	1.45192588269624	NA	NA	8.1689	2.01624804425258
ARH1_2016	B73/MO17	108	0.0129659791262199	16.2	0.652144003668883	0.005814	3866.12841337487	192	0.011755338691024	69.5	1.9153194765204	71.5	1.45192588269624	NA	NA	7.6758	2.02852059384535
ARH1_2016	B73/PHM49	119.5	0.0129659791262199	16.4	0.652144003668883	0.0120482	3866.12841337487	211	0.011755338691024	69.5	1.9153194765204	71	1.45192588269624	NA	NA	7.0287	2.02446355265766
ARH1_2016	B73/PHN82	121.5	0.0129659791262199	17.5	0.652144003668883	0.005618	3866.12841337487	199	0.011755338691024	70.5	1.9153194765204	72.5	1.45192588269624	NA	NA	8.6147	2.02466640471704
ARH1_2016	B73/TX6252	95	0.0129659791262199	19.4	0.652144003668883	0.0324675	3866.12841337487	183.5	0.011755338691024	69	1.9153194765204	72	1.45192588269624	NA	NA	8.2091	2.01371239351028
ARH1_2016	B73/TX777	128.5	0.0129659791262199	20.2	0.652144003668883	0.0068493	3866.12841337487	199.5	0.011755338691024	73.5	1.9153194765204	76	1.45192588269624	NA	NA	9.3716	2.02821631575627
ARH1_2016	B84/3IIH6	130.6925	0.00648329511251254	14.75	0.652144003668883	0.0113636	3866.12841337487	193.1996	0.00587788434617943	68.5	1.9153194765204	70	1.45192588269624	NA	NA	8.5402	2.02831774178596
ARH1_2016	B97/B47	104.5	0.0129659791262199	15.15	0.652144003668883	0.0265957	3866.12841337487	183	0.011755338691024	67	1.9153194765204	69	1.45192588269624	NA	NA	7.1503	2.01929082514335
ARH1_2016	BSSSC0_001/3IIH6	106	0.0129659791262199	15.55	0.652144003668883	0.0333333	3866.12841337487	173.5	0.011755338691024	69	1.9153194765204	69.5	1.45192588269624	NA	NA	7.064	2.02324644030135
ARH1_2016	BSSSC0_002/3IIH6	127.6925	0.00648329511251254	14.85	0.652144003668883	0.021978	3866.12841337487	180.1996	0.00587788434617943	68	1.9153194765204	69.5	1.45192588269624	NA	NA	6.1984	2.02841916781565
ARH1_2016	BSSSC0_003/3IIH6	92.5	0.0129659791262199	14.3	0.652144003668883	0.0247064	3866.12841337487	167.5	0.011755338691024	68	1.9153194765204	69.5	1.45192588269624	NA	NA	7.6255	2.02831774178596
ARH1_2016	BSSSC0_005/3IIH6	108.3075	0.00648282799327661	16.4636	0.326069184656206	0.0265446	1933.10081298322	187.8004	0.00587745907013393	68.618	0.957685431100847	68.4917	0.725970382258535	NA	NA	5.1971	1.01346389973753
ARH1_2016	BSSSC0_008/3IIH6	106	0.0129659791262199	14.55	0.652144003668883	0.1334055	3866.12841337487	184	0.011755338691024	68	1.9153194765204	69	1.45192588269624	NA	NA	7.0889	2.02831774178596
ARH1_2016	BSSSC0_009/3IIH6	122.5	0.0129659791262199	16	0.652144003668883	0.0283031	3866.12841337487	197.5	0.011755338691024	69	1.9153194765204	69.5	1.45192588269624	NA	NA	8.3963	2.0251735348655
ARH1_2016	BSSSC0_012/3IIH6	121	0.0129659791262199	15.5	0.652144003668883	0.0319149	3866.12841337487	200.5	0.011755338691024	68	1.9153194765204	69.5	1.45192588269624	NA	NA	7.8947	2.02578209104366
ARH1_2016	BSSSC0_015/3IIH6	107.3075	0.00648282799327661	16.05	0.652144003668883	0.0332478	3866.12841337487	195.8004	0.00587745907013393	68	1.9153194765204	69.5	1.45192588269624	NA	NA	8.3242	2.02375357044981
ARH1_2016	BSSSC0_017/3IIH6	108.5	0.0129659791262199	14.6	0.652144003668883	0.049843	3866.12841337487	157.5	0.011755338691024	67	1.9153194765204	69	1.45192588269624	NA	NA	7.2627	2.02446355265766
ARH1_2016	BSSSC0_020/3IIH6	92	0.0129659791262199	15.75	0.652144003668883	1.1560306e-17	3866.12841337487	167.5	0.011755338691024	67	1.9153194765204	68	1.45192588269624	NA	NA	8.1318	2.02243503206381
ARH1_2016	BSSSC0_024/3IIH6	118	0.0129659791262199	15.15	0.652144003668883	0.0258111	3866.12841337487	171	0.011755338691024	68	1.9153194765204	69.5	1.45192588269624	NA	NA	7.5026	2.02811488972658
ARH1_2016	BSSSC0_026/3IIH6	101.5	0.0129659791262199	15.45	0.652144003668883	1.2231156e-17	3866.12841337487	162	0.011755338691024	68.5	1.9153194765204	71	1.45192588269624	NA	NA	8.3907	2.02831774178596
ARH1_2016	BSSSC0_029/3IIH6	102	0.0129659791262199	16.2	0.652144003668883	0.0053763	3866.12841337487	188.5	0.011755338691024	69	1.9153194765204	69	1.45192588269624	NA	NA	8.5754	2.0251735348655
ARH1_2016	BSSSC0_033/3IIH6	108.3075	0.00648282799327661	15.6636	0.326069184656206	0.0121985	1933.10081298322	158.8004	0.00587745907013393	68.618	0.957685431100847	70.4917	0.725970382258535	NA	NA	7.1305	1.0138248749772
ARH1_2016	BSSSC0_038/3IIH6	88.3075	0.00648282799327661	15.75	0.652144003668883	0.0050505	3866.12841337487	149.8004	0.00587745907013393	69	1.9153194765204	69.5	1.45192588269624	NA	NA	6.9859	2.01188672497581
ARH1_2016	BSSSC0_057/3IIH6	137.5	0.0129659791262199	15.3	0.652144003668883	0.0112416	3866.12841337487	212	0.011755338691024	68	1.9153194765204	69.5	1.45192588269624	NA	NA	7.8626	2.02294216221227
ARH1_2016	BSSSC0_060/3IIH6	104.6925	0.00648329511251254	15.5364	0.326062174468503	0.0464882	1933.09345298724	196.1996	0.00587788434617943	67.382	0.957663394919169	69.5083	0.725987379632332	NA	NA	8.9134	1.0140226557351
ARH1_2016	CG102/3IIH6	106	0.0129659791262199	15.8	0.652144003668883	0.0225811	3866.12841337487	187.5	0.011755338691024	68	1.9153194765204	69.5	1.45192588269624	NA	NA	9.0676	2.02628922119212
ARH1_2016	CG106/3IIH6	109	0.0129659791262199	14.6	0.652144003668883	0.1001344	3866.12841337487	157	0.011755338691024	62	1.9153194765204	63	1.45192588269624	NA	NA	7.1694	2.02628922119212
ARH1_2016	CG44/CGR01	100.5	0.0129659791262199	16.3	0.652144003668883	0.0605599	3866.12841337487	158.5	0.011755338691024	62	1.9153194765204	64	1.45192588269624	NA	NA	6.3938	2.02760775957812
ARH1_2016	CG60/LH162	92.3075	0.00648282799327661	15.4636	0.326069184656206	0.00057060399	1933.10081298322	160.8004	0.00587745907013393	61.618	0.957685431100847	61.4917	0.725970382258535	NA	NA	4.8551	1.01138852031797
ARH1_2016	CI540/3IIH6	133	0.0129659791262199	15.85	0.652144003668883	0.016129	3866.12841337487	216	0.011755338691024	69	1.9153194765204	69.5	1.45192588269624	NA	NA	8.6008	2.02760775957812
ARH1_2016	CML269/LH195	97.6925	0.00648329511251254	21.1364	0.326062174468503	0.0247459	1933.09345298724	180.1996	0.00587788434617943	73.382	0.957663394919169	77.5083	0.725987379632332	NA	NA	9.515	1.0139604815789
ARH1_2016	CO258/3IIH6	102.5	0.0129659791262199	15.6	0.652144003668883	0.0073529	3866.12841337487	177.5	0.011755338691024	69	1.9153194765204	69.5	1.45192588269624	NA	NA	8.6173	2.02770918560781
ARH1_2016	DKFBHJ/3IIH6	114.5	0.0129659791262199	14.25	0.652144003668883	0.0164835	3866.12841337487	171.5	0.011755338691024	65.5	1.9153194765204	67	1.45192588269624	NA	NA	6.8473	2.02679635134058
ARH1_2016	F42/H95	112.5	0.0129659791262199	17.75	0.652144003668883	1.1993987e-17	3866.12841337487	194	0.011755338691024	69.5	1.9153194765204	73	1.45192588269624	NA	NA	7.1509	2.02294216221227
ARH1_2016	F42/MO17	132.5	0.0129659791262199	15.85	0.652144003668883	0.0175787	3866.12841337487	200	0.011755338691024	68.5	1.9153194765204	72.5	1.45192588269624	NA	NA	7.2385	2.02720205545935
ARH1_2016	F42/OH43	117	0.0129659791262199	17.75	0.652144003668883	0.010916	3866.12841337487	188.5	0.011755338691024	68	1.9153194765204	71	1.45192588269624	NA	NA	6.958	2.01705945249012
ARH1_2016	FBLA/3IIH6	108	0.0129659791262199	13.95	0.652144003668883	0.0052632	3866.12841337487	194	0.011755338691024	67	1.9153194765204	68	1.45192588269624	NA	NA	8.005	2.01330668939151
ARH1_2016	FE/3IIH6	113.6925	0.00648329511251254	14.5364	0.326062174468503	0.0679225	1933.09345298724	203.1996	0.00587788434617943	67.382	0.957663394919169	67.5083	0.725987379632332	NA	NA	7.5445	1.01175679823178
ARH1_2016	FR19/3IIH6	108.5	0.0129659791262199	14.6	0.652144003668883	0.0156986	3866.12841337487	187	0.011755338691024	68	1.9153194765204	69.5	1.45192588269624	NA	NA	7.9649	2.01046676056012
ARH1_2016	GEMS-0150/PHZ51	113	0.0129659791262199	20	0.652144003668883	0.021978	3866.12841337487	201	0.011755338691024	69.5	1.9153194765204	71.5	1.45192588269624	NA	NA	7.4285	2.02030508544027
ARH1_2016	GEMS-0163/PHZ51	108.5	0.0129659791262199	16.5	0.652144003668883	1.1993987e-17	3866.12841337487	235	0.011755338691024	70.5	1.9153194765204	71.5	1.45192588269624	NA	NA	6.8883	2.02578209104366
ARH1_2016	H122W/3IIH6	94.3075	0.00648282799327661	16.4636	0.326069184656206	0.00057060399	1933.10081298322	187.8004	0.00587745907013393	68.618	0.957685431100847	68.4917	0.725970382258535	NA	NA	6.1511	1.01175669680575
ARH1_2016	H84/3IIH6	99	0.0129659791262199	16.6	0.652144003668883	0.0064935	3866.12841337487	181.5	0.011755338691024	67	1.9153194765204	69	1.45192588269624	NA	NA	8.6799	2.02791203766719
ARH1_2016	H91/3IIH6	118	0.0129659791262199	14.65	0.652144003668883	0.0169888	3866.12841337487	201.5	0.011755338691024	68	1.9153194765204	69.5	1.45192588269624	NA	NA	8.196	2.02294216221227
ARH1_2016	I159/3IIH6	125	0.0129659791262199	15.35	0.652144003668883	0.0882353	3866.12841337487	207	0.011755338691024	69	1.9153194765204	70	1.45192588269624	NA	NA	8.3952	2.02760775957812
ARH1_2016	ILL.HY/3IIH6	118	0.0129659791262199	14.9	0.652144003668883	0.0414566	3866.12841337487	179	0.011755338691024	68	1.9153194765204	70	1.45192588269624	NA	NA	8.3022	2.02791203766719
ARH1_2016	LH123HT/3IIH6	103.5	0.0129659791262199	16	0.652144003668883	0.0451474	3866.12841337487	200	0.011755338691024	69	1.9153194765204	70	1.45192588269624	NA	NA	7.4609	2.02831774178596
ARH1_2016	LH145/3IIH6	110	0.0129659791262199	13.9	0.652144003668883	0.0202703	3866.12841337487	177	0.011755338691024	65.5	1.9153194765204	68	1.45192588269624	NA	NA	7.9503	2.02831774178596
ARH1_2016	LH149/3IIH6	93.6925	0.00648329511251254	14.7	0.652144003668883	0.0138889	3866.12841337487	177.1996	0.00587788434617943	64	1.9153194765204	67	1.45192588269624	NA	NA	8.5192	2.0264920732515
ARH1_2016	LH195/3IIH6	108.5	0.0129659791262199	16.1	0.652144003668883	0.0052083	3866.12841337487	170.5	0.011755338691024	69	1.9153194765204	69.5	1.45192588269624	NA	NA	8.0331	2.02375357044981
ARH1_2016	LH195/LH123HT	120	0.0129659791262199	17.8	0.652144003668883	1.1993987e-17	3866.12841337487	204.5	0.011755338691024	71.5	1.9153194765204	74	1.45192588269624	NA	NA	7.5086	2.0251735348655
ARH1_2016	LH195/LH185	96	0.0129659791262199	17	0.652144003668883	1.1993987e-17	3866.12841337487	178.5	0.011755338691024	69.5	1.9153194765204	71.5	1.45192588269624	NA	NA	8.3867	2.02811488972658
ARH1_2016	LH195/LH210	117.5	0.0129659791262199	18.4	0.652144003668883	1.1546753e-17	3866.12841337487	197	0.011755338691024	71.5	1.9153194765204	74	1.45192588269624	NA	NA	9.0915	2.02852059384535
ARH1_2016	LH195/NK787	103	0.0129659791262199	20.9	0.652144003668883	1.2414115e-17	3866.12841337487	184	0.011755338691024	71.5	1.9153194765204	74	1.45192588269624	NA	NA	9.1512	2.02852059384535
ARH1_2016	LH195/PHJ65	99.5	0.0129659791262199	19	0.652144003668883	0.0185185	3866.12841337487	203.5	0.011755338691024	75	1.9153194765204	78	1.45192588269624	NA	NA	8.7049	2.02679635134058
ARH1_2016	LH195/PHM49	93	0.0129659791262199	17.8	0.652144003668883	0.0055556	3866.12841337487	181.5	0.011755338691024	72.5	1.9153194765204	75	1.45192588269624	NA	NA	6.0297	2.02294216221227
ARH1_2016	LH195/PHN47	102.6925	0.00648329511251254	18.75	0.652144003668883	1.238701e-17	3866.12841337487	175.1996	0.00587788434617943	74	1.9153194765204	77	1.45192588269624	NA	NA	8.5985	2.02720205545935
ARH1_2016	LH195/PHN82	91.5	0.0129659791262199	17.6	0.652144003668883	0.005618	3866.12841337487	173.5	0.011755338691024	71	1.9153194765204	74	1.45192588269624	NA	NA	8.7738	2.02821631575627
ARH1_2016	LH195/PHP60	88.5	0.0129659791262199	18.25	0.652144003668883	1.1993987e-17	3866.12841337487	181.5	0.011755338691024	71.5	1.9153194765204	72	1.45192588269624	NA	NA	9.9776	2.01087246467889
ARH1_2016	LH195/PHR03	108	0.0129659791262199	19.6	0.652144003668883	0.01875	3866.12841337487	211	0.011755338691024	75	1.9153194765204	76	1.45192588269624	NA	NA	6.9638	2.02791203766719
ARH1_2016	LH195/PHR63	101.5	0.0129659791262199	19.05	0.652144003668883	1.238701e-17	3866.12841337487	170.5	0.011755338691024	69	1.9153194765204	70	1.45192588269624	NA	NA	7.9759	2.00458405083797
ARH1_2016	LH195/PHW30	105.5	0.0129659791262199	17.65	0.652144003668883	1.2861348e-17	3866.12841337487	189	0.011755338691024	70	1.9153194765204	71.5	1.45192588269624	NA	NA	8.2592	2.02841916781565
ARH1_2016	LH195/PHW53	101	0.0129659791262199	17.55	0.652144003668883	1.1993987e-17	3866.12841337487	177.5	0.011755338691024	71.5	1.9153194765204	73	1.45192588269624	NA	NA	7.3139	2.02720205545935
ARH1_2016	LH195/PHZ51	104.25	0.0258049174560569	17.375	1.29819504045599	0.0164875	7717.34315068993	194.5	0.0233949077918841	70.5	3.81225943033102	71.5	2.88984534578348	NA	NA	9.1942	4.05501266709685
ARH1_2016	LH195/Q381	94	0.0129659791262199	17.05	0.652144003668883	1.1993987e-17	3866.12841337487	171.5	0.011755338691024	69	1.9153194765204	70.5	1.45192588269624	NA	NA	7.3306	2.02466640471704
ARH1_2016	LH198/3IIH6	114.5	0.0129659791262199	14.55	0.652144003668883	0.0113059	3866.12841337487	177	0.011755338691024	67	1.9153194765204	67	1.45192588269624	NA	NA	8.4226	2.02294216221227
ARH1_2016	LH198/PHZ51	106.5	0.0129659791262199	15.75	0.652144003668883	0.0060976	3866.12841337487	199.5	0.011755338691024	68.5	1.9153194765204	70	1.45192588269624	NA	NA	7.7905	2.02537638692489
ARH1_2016	LH205/3IIH6	123.6925	0.00648329511251254	14.7	0.652144003668883	0.0059524	3866.12841337487	196.1996	0.00587788434617943	67	1.9153194765204	67	1.45192588269624	NA	NA	9.0704	2.02628922119212
ARH1_2016	LH209/3IIH6	100	0.0129659791262199	21.05	0.652144003668883	0.0337079	3866.12841337487	168.5	0.011755338691024	65.5	1.9153194765204	67	1.45192588269624	NA	NA	6.9532	2.02213075397473
ARH1_2016	LH212HT/LH195	111	0.0129659791262199	15.85	0.652144003668883	1.238701e-17	3866.12841337487	206.5	0.011755338691024	71	1.9153194765204	72	1.45192588269624	NA	NA	8.4458	2.02030508544027
ARH1_2016	LH216/LH195	106	0.0129659791262199	17.65	0.652144003668883	0.0060976	3866.12841337487	199	0.011755338691024	71	1.9153194765204	72.5	1.45192588269624	NA	NA	8.3671	2.02821631575627
ARH1_2016	LH220HT/3IIH6	90.5	0.0129659791262199	14.25	0.652144003668883	0.0051546	3866.12841337487	179.5	0.011755338691024	67	1.9153194765204	67	1.45192588269624	NA	NA	8.3691	2.00742397966936
ARH1_2016	LH222/3IIH6	110	0.0129659791262199	14.15	0.652144003668883	0.0116279	3866.12841337487	168	0.011755338691024	65.5	1.9153194765204	68	1.45192588269624	NA	NA	8.0828	2.02628922119212
ARH1_2016	LH74/PHN82	102.5	0.0129659791262199	16.9	0.652144003668883	0.0064103	3866.12841337487	173.5	0.011755338691024	68	1.9153194765204	70	1.45192588269624	NA	NA	9.1694	2.02243503206381
ARH1_2016	LH82/LH195	77.5	0.0129659791262199	17.15	0.652144003668883	1.1993987e-17	3866.12841337487	168	0.011755338691024	69	1.9153194765204	70	1.45192588269624	NA	NA	7.9923	2.01462522777751
ARH1_2016	MS222/3IIH6	105.5	0.0129659791262199	16.45	0.652144003668883	0.0205479	3866.12841337487	192.5	0.011755338691024	68	1.9153194765204	69.5	1.45192588269624	792.2625	0.00911162255042645	7.909	2.02537638692489
ARH1_2016	N192/3IIH6	123	0.0129659791262199	14.5	0.652144003668883	0.0465957	3866.12841337487	173	0.011755338691024	67	1.9153194765204	67	1.45192588269624	814.1447	0.00911162255042645	7.5361	2.02791203766719
ARH1_2016	N209/3IIH6	115	0.0129659791262199	16.05	0.652144003668883	0.0222469	3866.12841337487	184	0.011755338691024	69	1.9153194765204	70	1.45192588269624	793.5497	0.00911162255042645	10.3488	2.0212179197075
ARH1_2016	N217/3IIH6	113.5	0.0129659791262199	16.75	0.652144003668883	0.0163403	3866.12841337487	200.5	0.011755338691024	69	1.9153194765204	69	1.45192588269624	789.6881	0.00911162255042645	8.5993	2.02030508544027
ARH1_2016	N218/3IIH6	115	0.0129659791262199	15.4	0.652144003668883	1.2231156e-17	3866.12841337487	194	0.011755338691024	69.5	1.9153194765204	70	1.45192588269624	803.8472	0.00911162255042645	9.1142	2.02760775957812
ARH1_2016	N28HT/3IIH6	104.5	0.0129659791262199	15.25	0.652144003668883	1.2231156e-17	3866.12841337487	173.5	0.011755338691024	67	1.9153194765204	69	1.45192588269624	805.1344	0.00911162255042645	7.9692	2.02689777737027
ARH1_2016	N501/3IIH6	101.5	0.0129659791262199	14.7	0.652144003668883	0.0061728	3866.12841337487	194	0.011755338691024	67	1.9153194765204	69	1.45192588269624	812.2139	0.00911162255042645	7.1442	2.02213075397473
ARH1_2016	OS420/3IIH6	112.5	0.0129659791262199	15.75	0.652144003668883	0.0379167	3866.12841337487	183.5	0.011755338691024	67	1.9153194765204	69	1.45192588269624	798.6984	0.00911162255042645	8.3261	2.0094525002632
ARH1_2016	PB80/PHZ51	111.5	0.0129659791262199	17.2	0.652144003668883	0.0164835	3866.12841337487	205.5	0.011755338691024	69	1.9153194765204	70	1.45192588269624	786.4702	0.00911162255042645	7.9196	2.02791203766719
ARH1_2016	PHB09/3IIH6	113.5	0.0129659791262199	14.8	0.652144003668883	0.0193275	3866.12841337487	184.5	0.011755338691024	67	1.9153194765204	67	1.45192588269624	808.9959	0.00911162255042645	8.1055	2.02791203766719
ARH1_2016	PHBB3/3IIH6	115	0.0129659791262199	14.75	0.652144003668883	0.0063291	3866.12841337487	187.5	0.011755338691024	67	1.9153194765204	69	1.45192588269624	808.9959	0.00911162255042645	9.3931	2.01371239351028
ARH1_2016	PHBW8/3IIH6	130	0.0129659791262199	14.9	0.652144003668883	0.0182927	3866.12841337487	208.5	0.011755338691024	67	1.9153194765204	67	1.45192588269624	809.6395	0.00911162255042645	9.6828	2.02841916781565
ARH1_2016	PHG29/PHG47	92.3075	0.00648282799327661	15.65	0.652144003668883	0.0222222	3866.12841337487	179.8004	0.00587745907013393	64.5	1.9153194765204	65.5	1.45192588269624	798.6984	0.00911162255042645	8.0913	2.0212179197075
ARH1_2016	PHG39/PHN82	111	0.0129659791262199	17.15	0.652144003668883	1.3091741e-17	3866.12841337487	180.5	0.011755338691024	70	1.9153194765204	73	1.45192588269624	789.0445	0.00911162255042645	9.3093	2.02375357044981
ARH1_2016	PHG39/TX205	112	0.0129659791262199	17.7	0.652144003668883	1.2732599e-17	3866.12841337487	215.5	0.011755338691024	72.5	1.9153194765204	74	1.45192588269624	779.3907	0.00911162255042645	7.9311	2.02578209104366
ARH1_2016	PHG80/3IIH6	101.5	0.0129659791262199	15.4	0.652144003668883	0.0120482	3866.12841337487	190	0.011755338691024	67	1.9153194765204	68	1.45192588269624	799.9856	0.00911162255042645	9.7233	2.02841916781565
ARH1_2016	PHG80/PHZ51	117	0.0129659791262199	16.8	0.652144003668883	1.3091741e-17	3866.12841337487	194	0.011755338691024	68	1.9153194765204	69	1.45192588269624	789.0445	0.00911162255042645	7.8245	2.02791203766719
ARH1_2016	PHN11_OH43_0001/B47	104.5	0.0129659791262199	15.4	0.652144003668883	0.0064103	3866.12841337487	170	0.011755338691024	65.5	1.9153194765204	68.5	1.45192588269624	799.9856	0.00911162255042645	6.9005	2.02852059384535
ARH1_2016	PHN11_PHG47_0251/B47	96.5	0.0129659791262199	17.5	0.652144003668883	1.1865238e-17	3866.12841337487	179	0.011755338691024	65.5	1.9153194765204	68	1.45192588269624	778.1035	0.00911162255042645	7.4275	2.02831774178596
ARH1_2016	PHN11_PHW65_0323/LH195	91.5	0.0129659791262199	18.05	0.652144003668883	1.2732599e-17	3866.12841337487	196	0.011755338691024	71	1.9153194765204	71.5	1.45192588269624	776.1727	0.00911162255042645	7.5586	2.01188672497581
ARH1_2016	PHP02/B47	110.5	0.0129659791262199	16.1	0.652144003668883	0.0320513	3866.12841337487	184	0.011755338691024	64.5	1.9153194765204	67	1.45192588269624	797.4113	0.00911162255042645	7.2341	2.02720205545935
ARH1_2016	PHP38/LH123HT	115.5	0.0129659791262199	16.5	0.652144003668883	0.0107527	3866.12841337487	214.5	0.011755338691024	71	1.9153194765204	73	1.45192588269624	792.2625	0.00911162255042645	7.966	2.00894537011474
ARH1_2016	PHP38/LH185	89	0.0129659791262199	16.05	0.652144003668883	0.0063291	3866.12841337487	173.5	0.011755338691024	68	1.9153194765204	69.5	1.45192588269624	795.4805	0.00911162255042645	6.2862	2.01229242909458
ARH1_2016	PHP38/LH210	111	0.0129659791262199	16.45	0.652144003668883	1.2732599e-17	3866.12841337487	207	0.011755338691024	70	1.9153194765204	72	1.45192588269624	794.8369	0.00911162255042645	8.6736	2.02791203766719
ARH1_2016	PHP38/PHJ65	114	0.0129659791262199	17.75	0.652144003668883	1.3091741e-17	3866.12841337487	203	0.011755338691024	70	1.9153194765204	70.5	1.45192588269624	781.3214	0.00911162255042645	8.1514	2.02841916781565
ARH1_2016	PHP38/PHM49	103.5	0.0129659791262199	17.05	0.652144003668883	1.3091741e-17	3866.12841337487	189.5	0.011755338691024	69	1.9153194765204	71	1.45192588269624	787.1138	0.00911162255042645	7.1946	2.01847941690581
ARH1_2016	PHP38/PHN47	107	0.0129659791262199	17.35	0.652144003668883	1.3091741e-17	3866.12841337487	205	0.011755338691024	71.5	1.9153194765204	74	1.45192588269624	785.8266	0.00911162255042645	9.8552	2.00458405083797
ARH1_2016	PHP38/PHN82	95	0.0129659791262199	27.8	0.652144003668883	1.1865238e-17	3866.12841337487	182.5	0.011755338691024	69.5	1.9153194765204	71.5	1.45192588269624	729.834	0.00911162255042645	8.7488	2.02760775957812
ARH1_2016	PHP38/PHP60	105.5	0.0129659791262199	16.6	0.652144003668883	1.2732599e-17	3866.12841337487	189.5	0.011755338691024	69.5	1.9153194765204	70	1.45192588269624	793.5497	0.00911162255042645	8.6887	1.98480597504798
ARH1_2016	PHP38/PHR03	104	0.0129659791262199	16.65	0.652144003668883	1.1865238e-17	3866.12841337487	211.5	0.011755338691024	70.5	1.9153194765204	72.5	1.45192588269624	793.5497	0.00911162255042645	8.6787	2.01959510323243
ARH1_2016	PHP38/PHR63	85	0.0129659791262199	17.8	0.652144003668883	1.1865238e-17	3866.12841337487	185.5	0.011755338691024	69	1.9153194765204	70.5	1.45192588269624	778.1035	0.00911162255042645	8.7278	2.02324644030135
ARH1_2016	PHP38/PHW30	108	0.0129659791262199	16.45	0.652144003668883	1.1865238e-17	3866.12841337487	192.5	0.011755338691024	69	1.9153194765204	70.5	1.45192588269624	793.5497	0.00911162255042645	9.4925	2.02395642250919
ARH1_2016	PHP38/PHW53	97.5	0.0129659791262199	16.4	0.652144003668883	1.2732599e-17	3866.12841337487	165.5	0.011755338691024	69	1.9153194765204	72.5	1.45192588269624	796.1241	0.00911162255042645	8.1219	2.02588351707335
ARH1_2016	PHP38/Q381	104	0.0129659791262199	15	0.652144003668883	1.2732599e-17	3866.12841337487	175.5	0.011755338691024	67	1.9153194765204	69	1.45192588269624	809.6395	0.00911162255042645	7.8822	2.02395642250919
ARH1_2016	PHP85/3IIH6	105.5	0.0129659791262199	15.2	0.652144003668883	0.0053763	3866.12841337487	193	0.011755338691024	69	1.9153194765204	69	1.45192588269624	805.778	0.00911162255042645	9.3056	2.01188672497581
ARH1_2016	PHT69/3IIH6	104.5	0.0129659791262199	14.75	0.652144003668883	0.0287582	3866.12841337487	174	0.011755338691024	65.5	1.9153194765204	67	1.45192588269624	808.9959	0.00911162255042645	8.1122	2.0251735348655
ARH1_2016	PHV37/3IIH6	94	0.0129659791262199	14.3	0.652144003668883	0.0108696	3866.12841337487	188	0.011755338691024	67	1.9153194765204	67	1.45192588269624	813.5011	0.00911162255042645	8.6015	2.01584234013381
ARH1_2016	PHV63/LH123HT	85.5	0.0129659791262199	17.55	0.652144003668883	1.3098517e-17	3866.12841337487	176.5	0.011755338691024	69.5	1.9153194765204	71.5	1.45192588269624	783.2522	0.00911162255042645	7.0585	2.0173637305792
ARH1_2016	PHV63/LH185	95.5	0.0129659791262199	16.65	0.652144003668883	1.2231156e-17	3866.12841337487	173	0.011755338691024	68	1.9153194765204	69	1.45192588269624	791.6189	0.00911162255042645	7.8855	2.02243503206381
ARH1_2016	PHV63/LH210	118	0.0129659791262199	18.45	0.652144003668883	1.2231156e-17	3866.12841337487	188.5	0.011755338691024	69.5	1.9153194765204	71.5	1.45192588269624	774.8855	0.00911162255042645	8.8114	2.02831774178596
ARH1_2016	PHV63/NK787	105.5	0.0129659791262199	18.65	0.652144003668883	1.3098517e-17	3866.12841337487	212	0.011755338691024	75	1.9153194765204	77	1.45192588269624	776.1727	0.00911162255042645	7.6011	2.0264920732515
ARH1_2016	PHV63/PHJ65	111.5	0.0129659791262199	18.35	0.652144003668883	1.2231156e-17	3866.12841337487	205	0.011755338691024	70.5	1.9153194765204	71	1.45192588269624	776.8163	0.00911162255042645	9.9573	2.02466640471704
ARH1_2016	PHV63/PHM49	96	0.0129659791262199	17.45	0.652144003668883	1.1865238e-17	3866.12841337487	176	0.011755338691024	71	1.9153194765204	72	1.45192588269624	780.0343	0.00911162255042645	7.47	2.02243503206381
ARH1_2016	PHV63/PHM57	99	0.0129659791262199	17.55	0.652144003668883	1.2732599e-17	3866.12841337487	191.5	0.011755338691024	74	1.9153194765204	76	1.45192588269624	783.8958	0.00911162255042645	7.9565	1.99139866697798
ARH1_2016	PHV63/PHN47	113.5	0.0129659791262199	18.05	0.652144003668883	1.3098517e-17	3866.12841337487	208	0.011755338691024	72.5	1.9153194765204	75	1.45192588269624	778.7471	0.00911162255042645	9.1566	2.02466640471704
ARH1_2016	PHV63/PHN82	102	0.0129659791262199	17.25	0.652144003668883	1.3965879e-17	3866.12841337487	181.5	0.011755338691024	69.5	1.9153194765204	71	1.45192588269624	787.7574	0.00911162255042645	8.4647	2.02841916781565
ARH1_2016	PHV63/PHP60	103.5	0.0129659791262199	18.05	0.652144003668883	0.0174419	3866.12841337487	186	0.011755338691024	69.5	1.9153194765204	70.5	1.45192588269624	781.3214	0.00911162255042645	8.2485	2.02628922119212
ARH1_2016	PHV63/PHR03	124.5	0.0129659791262199	17.7	0.652144003668883	0.0182927	3866.12841337487	190	0.011755338691024	69	1.9153194765204	71	1.45192588269624	781.3214	0.00911162255042645	8.2922	2.02395642250919
ARH1_2016	PHV63/PHR63	92	0.0129659791262199	16.75	0.652144003668883	0.0125	3866.12841337487	171	0.011755338691024	67	1.9153194765204	69	1.45192588269624	790.3317	0.00911162255042645	8.0277	2.02821631575627
ARH1_2016	PHV63/PHW30	108	0.0129659791262199	16.6	0.652144003668883	0.0123457	3866.12841337487	208	0.011755338691024	69.5	1.9153194765204	71	1.45192588269624	793.5497	0.00911162255042645	7.4632	2.02689777737027
ARH1_2016	PHV63/PHW53	86.5	0.0129659791262199	17.05	0.652144003668883	1.238701e-17	3866.12841337487	175.5	0.011755338691024	69.5	1.9153194765204	71.5	1.45192588269624	788.401	0.00911162255042645	8.067	2.02791203766719
ARH1_2016	PHV63/PHZ51	102.5	0.0129659791262199	20.7	0.652144003668883	1.238701e-17	3866.12841337487	200.5	0.011755338691024	69	1.9153194765204	70.5	1.45192588269624	753.647	0.00911162255042645	7.8306	2.02852059384535
ARH1_2016	PHV63/Q381	97.5	0.0129659791262199	14.95	0.652144003668883	0.0069444	3866.12841337487	174	0.011755338691024	68	1.9153194765204	69	1.45192588269624	808.3523	0.00911162255042645	6.8593	2.02466640471704
ARH1_2016	PHW52/LH185	92	0.0129659791262199	18.2	0.652144003668883	1.238701e-17	3866.12841337487	197.5	0.011755338691024	68	1.9153194765204	69	1.45192588269624	774.8855	0.00911162255042645	8.9788	2.02791203766719
ARH1_2016	PHW52/LH210	109.5	0.0129659791262199	18	0.652144003668883	1.238701e-17	3866.12841337487	198	0.011755338691024	69.5	1.9153194765204	71.5	1.45192588269624	779.3907	0.00911162255042645	8.8517	2.01087246467889
ARH1_2016	PHW52/NK787	103	0.0129659791262199	21.2	0.652144003668883	0.0056818	3866.12841337487	219	0.011755338691024	70.5	1.9153194765204	72	1.45192588269624	749.7854	0.00911162255042645	8.9847	2.02841916781565
ARH1_2016	PHW52/PHJ65	122.5	0.0129659791262199	18.9	0.652144003668883	1.1079191e-17	3866.12841337487	218.5	0.011755338691024	71	1.9153194765204	71.5	1.45192588269624	771.024	0.00911162255042645	9.7719	2.02831774178596
ARH1_2016	PHW52/PHM49	112.5	0.0258049174560569	20.925	1.29819504045599	1.3254372e-17	7717.34315068993	195.5	0.0233949077918841	70.25	3.81225943033102	73	2.88984534578348	753.647	0.0180498524552767	8.2942	4.01018236197287
ARH1_2016	PHW52/PHN47	112	0.0129659791262199	18.15	0.652144003668883	0.0119048	3866.12841337487	208	0.011755338691024	72	1.9153194765204	72.5	1.45192588269624	775.5291	0.00911162255042645	9.3284	2.02466640471704
ARH1_2016	PHW52/PHN82	96	0.0258049174560569	17.575	1.29819504045599	0.0033333	7717.34315068993	191.5	0.0233949077918841	69.25	3.81225943033102	69.5	2.88984534578348	781.965	0.0180498524552767	8.8593	4.03736453793039
ARH1_2016	PHW52/PHP60	96.5	0.0129659791262199	17.55	0.652144003668883	1.3254372e-17	3866.12841337487	206.5	0.011755338691024	71	1.9153194765204	71.5	1.45192588269624	784.5394	0.00911162255042645	9.0634	2.01624804425258
ARH1_2016	PHW52/PHR03	123	0.0129659791262199	18.15	0.652144003668883	1.238701e-17	3866.12841337487	217.5	0.011755338691024	72	1.9153194765204	73	1.45192588269624	778.1035	0.00911162255042645	9.7085	2.02537638692489
ARH1_2016	PHW52/PHR63	89	0.0129659791262199	17.65	0.652144003668883	1.238701e-17	3866.12841337487	181	0.011755338691024	68	1.9153194765204	69.5	1.45192588269624	781.3214	0.00911162255042645	8.7272	2.02446355265766
ARH1_2016	PHW52/PHW30	108	0.0129659791262199	15.9	0.652144003668883	1.238701e-17	3866.12841337487	217.5	0.011755338691024	69	1.9153194765204	70	1.45192588269624	799.9856	0.00911162255042645	8.8448	2.02243503206381
ARH1_2016	PHW52/PHW53	106	0.0129659791262199	17.35	0.652144003668883	1.238701e-17	3866.12841337487	213.5	0.011755338691024	69	1.9153194765204	70.5	1.45192588269624	783.2522	0.00911162255042645	10.268	2.02821631575627
ARH1_2016	PHW52/PHZ51	99	0.0129659791262199	18.2	0.652144003668883	1.238701e-17	3866.12841337487	201	0.011755338691024	70	1.9153194765204	71	1.45192588269624	774.8855	0.00911162255042645	9.3826	2.01624804425258
ARH1_2016	PHW52/Q381	102	0.0129659791262199	16	0.652144003668883	0.0054945	3866.12841337487	198	0.011755338691024	67	1.9153194765204	69	1.45192588269624	798.0548	0.00911162255042645	8.0367	2.02730348148904
ARH1_2016	PHW52/TX205	113	0.0129659791262199	19.2	0.652144003668883	0.0055556	3866.12841337487	207.5	0.011755338691024	71.5	1.9153194765204	73	1.45192588269624	767.1624	0.00911162255042645	10.1883	2.02446355265766
ARH1_2016	PHW53/LH123HT	100.5	0.0129659791262199	17.2	0.652144003668883	0.0164141	3866.12841337487	213	0.011755338691024	69.5	1.9153194765204	71	1.45192588269624	785.8266	0.00911162255042645	10.0651	2.01330668939151
ARH1_2016	R229/3IIH6	117.5	0.0129659791262199	16.1	0.652144003668883	1.238701e-17	3866.12841337487	182.5	0.011755338691024	68	1.9153194765204	69.5	1.45192588269624	794.1933	0.00911162255042645	8.4821	2.02588351707335
ARH1_2016	REDEAR-B/LH195	118	0.0129659791262199	20.15	0.652144003668883	1.238701e-17	3866.12841337487	185.5	0.011755338691024	72	1.9153194765204	75	1.45192588269624	762.0137	0.00911162255042645	7.3903	2.0251735348655
ARH1_2016	SD101/3IIH6	94	0.0129659791262199	15.65	0.652144003668883	1.1519648e-17	3866.12841337487	181	0.011755338691024	67	1.9153194765204	69	1.45192588269624	794.8369	0.00911162255042645	9.0899	2.02852059384535
ARH1_2016	TR9-1-1-6/3IIH6	114.5	0.0129659791262199	14.75	0.652144003668883	0.0400986	3866.12841337487	175	0.011755338691024	67	1.9153194765204	69	1.45192588269624	810.9267	0.00911162255042645	6.9466	2.02852059384535
ARH1_2016	TX303/TX777	105.5	0.0129659791262199	23.2	0.652144003668883	0.0385154	3866.12841337487	200.5	0.011755338691024	78	1.9153194765204	84	1.45192588269624	727.9032	0.00911162255042645	7.2108	2.02395642250919
ARH1_2016	TX6252/TX714	87.5	0.0129659791262199	20.45	0.652144003668883	0.046074	3866.12841337487	185.5	0.011755338691024	69	1.9153194765204	71.5	1.45192588269624	754.9341	0.00911162255042645	6.3245	2.02213075397473
ARH1_2016	TX714/PHZ51	114	0.0129659791262199	17.8	0.652144003668883	0.005814	3866.12841337487	231	0.011755338691024	71.5	1.9153194765204	72.5	1.45192588269624	781.3214	0.00911162255042645	8.2879	2.01087246467889
ARH1_2016	TX714/TX777	132	0.0129659791262199	22.25	0.652144003668883	0.00625	3866.12841337487	230.5	0.011755338691024	78	1.9153194765204	78	1.45192588269624	740.7751	0.00911162255042645	9.9001	2.02770918560781
ARH1_2016	TX740/LH195	98.5	0.0129659791262199	21.9	0.652144003668883	1.3098517e-17	3866.12841337487	179	0.011755338691024	73	1.9153194765204	77	1.45192588269624	742.0623	0.00911162255042645	7.9559	2.01371239351028
ARH1_2016	TX770/LH195	104	0.0129659791262199	20.2	0.652144003668883	0.0319116	3866.12841337487	198.5	0.011755338691024	75	1.9153194765204	78	1.45192588269624	756.8649	0.00911162255042645	7.2473	2.02821631575627
ARH1_2016	TX772W/LH195	94	0.0129659791262199	21.4	0.652144003668883	0.0060241	3866.12841337487	168	0.011755338691024	71.5	1.9153194765204	72.5	1.45192588269624	747.211	0.00911162255042645	7.8737	2.02760775957812
ARH1_2016	VA35/LH195	108	0.0129659791262199	19.7	0.652144003668883	0.0154639	3866.12841337487	168.5	0.011755338691024	71.5	1.9153194765204	73	1.45192588269624	764.588	0.00911162255042645	8.2188	2.01462522777751
ARH1_2016	W10004_0007/3IIH6	102.5	0.0129659791262199	14.45	0.652144003668883	1.3098517e-17	3866.12841337487	174.5	0.011755338691024	67	1.9153194765204	69	1.45192588269624	815.4318	0.00911162255042645	7.843	2.02831774178596
ARH1_2016	W10004_0008/3IIH6	126.5	0.0129659791262199	15	0.652144003668883	0.0194805	3866.12841337487	194.5	0.011755338691024	68	1.9153194765204	68.5	1.45192588269624	805.778	0.00911162255042645	8.5652	2.0264920732515
ARH1_2016	W10004_0041/3IIH6	115.5	0.0129659791262199	14.5	0.652144003668883	1.1519648e-17	3866.12841337487	205.5	0.011755338691024	67	1.9153194765204	68	1.45192588269624	810.2831	0.00911162255042645	8.0525	2.02770918560781
ARH1_2016	W10004_0045/3IIH6	112	0.0129659791262199	14.65	0.652144003668883	0.0830617	3866.12841337487	204.5	0.011755338691024	68	1.9153194765204	67.5083	0.725987379632332	809.6395	0.00911162255042645	8.0883	2.02811488972658
ARH1_2016	W10004_0062/3IIH6	111.5	0.0129659791262199	15.4	0.652144003668883	1.1519648e-17	3866.12841337487	177.5	0.011755338691024	67	1.9153194765204	69	1.45192588269624	801.9164	0.00911162255042645	6.3704	2.02375357044981
ARH1_2016	W10004_0072/3IIH6	112	0.0129659791262199	14.5	0.652144003668883	0.017483	3866.12841337487	180.5	0.011755338691024	67	1.9153194765204	68	1.45192588269624	814.1447	0.00911162255042645	8.7252	2.0251735348655
ARH1_2016	W10004_0080/3IIH6	124.5	0.0129659791262199	14.45	0.652144003668883	0.0333333	3866.12841337487	201.5	0.011755338691024	68	1.9153194765204	69	1.45192588269624	810.9267	0.00911162255042645	8.605	2.0212179197075
ARH1_2016	W10004_0095/3IIH6	123	0.0129659791262199	14.9	0.652144003668883	0.0924006	3866.12841337487	180.5	0.011755338691024	67	1.9153194765204	69	1.45192588269624	807.0651	0.00911162255042645	8.5367	2.02831774178596
ARH1_2016	W10004_0121/3IIH6	108.5	0.0129659791262199	15	0.652144003668883	0.0058824	3866.12841337487	203	0.011755338691024	68	1.9153194765204	68	1.45192588269624	807.0651	0.00911162255042645	8.4254	2.02578209104366
ARH1_2016	W10004_0140/3IIH6	112.5	0.0129659791262199	14.75	0.652144003668883	0.032224	3866.12841337487	181	0.011755338691024	67	1.9153194765204	69	1.45192588269624	809.6395	0.00911162255042645	7.7928	2.02689777737027
ARH1_2016	W10004_0148/3IIH6	126.5	0.0129659791262199	14.5	0.652144003668883	0.037234	3866.12841337487	188	0.011755338691024	67	1.9153194765204	68	1.45192588269624	812.2139	0.00911162255042645	9.0678	2.01188672497581
ARH1_2016	W10004_0178/3IIH6	118	0.0129659791262199	15	0.652144003668883	1.3965879e-17	3866.12841337487	183	0.011755338691024	67	1.9153194765204	68	1.45192588269624	805.778	0.00911162255042645	8.6343	2.01817513881674
ARH1_2016	W10004_0208/3IIH6	125.5	0.0129659791262199	14.45	0.652144003668883	1.238701e-17	3866.12841337487	196	0.011755338691024	67	1.9153194765204	68	1.45192588269624	812.2139	0.00911162255042645	8.1428	2.02720205545935
ARH1_2016	W10004_0212/3IIH6	127.5	0.0129659791262199	14.85	0.652144003668883	0.050411	3866.12841337487	181.5	0.011755338691024	67	1.9153194765204	69	1.45192588269624	807.0651	0.00911162255042645	8.5051	2.01929082514335
ARH1_2016	W10004_0225/3IIH6	126.5	0.0129659791262199	14.35	0.652144003668883	0.0111903	3866.12841337487	188	0.011755338691024	67	1.9153194765204	68	1.45192588269624	810.9267	0.00911162255042645	8.925	2.02213075397473
ARH1_2016	W10004_0258/3IIH6	113.5	0.0129659791262199	14.2	0.652144003668883	0.0444444	3866.12841337487	182.5	0.011755338691024	65.5	1.9153194765204	67	1.45192588269624	810.9267	0.00911162255042645	7.0654	2.02770918560781
ARH1_2016	W10004_0292/3IIH6	99	0.0129659791262199	14.6	0.652144003668883	0.0507752	3866.12841337487	183.5	0.011755338691024	67	1.9153194765204	67	1.45192588269624	810.9267	0.00911162255042645	7.8726	2.02446355265766
ARH1_2016	W10005_0107/B47	100	0.0129659791262199	14.95	0.652144003668883	1.238701e-17	3866.12841337487	161.5	0.011755338691024	65.5	1.9153194765204	67	1.45192588269624	807.7087	0.00911162255042645	6.5983	2.0212179197075
ARH1_2016	W37A/B47	95.6925	0.00648329511251254	17.5	0.652144003668883	0.1971452	3866.12841337487	148.1996	0.00587788434617943	62	1.9153194765204	67	1.45192588269624	781.965	0.00911162255042645	6.8616	2.01817513881674
ARH1_2016	WF9/H95	115	0.0129659791262199	16.55	0.652144003668883	1.1079191e-17	3866.12841337487	171.5	0.011755338691024	67	1.9153194765204	69.5	1.45192588269624	794.8369	0.00911162255042645	7.969	2.02375357044981
DEH1_2014	ARGENTINE_FLINTY_COMPOSITE-C(1)-37-B-B-B2-1-B25/LH195	106.3006	0.029703855112421	26.0369	11.2457740237469	0.0166667	245.979337522633	214.0118	0.0355571780445091	72	1.74795566310719	71	1.2226695356424	NA	NA	13.32	1.31717709720373
DEH1_2014	B37/MO17	109.7243	0.0305043494794885	19.9122	10.0913560439967	0.0636364	258.347534348706	192.8408	0.0360211951017095	66	1.99350797775867	67.5	1.34011244533907	NA	NA	12.7257	1.32330226364847
DEH1_2014	B37/OH43	98.5921	0.0303959690069877	21.8028	10.2961164387861	0.0862069	258.347534348706	206.7579	0.0360752472678709	65	1.99350797775867	67	1.34011244533907	NA	NA	11.1081	1.3211051930759
DEH1_2014	B47/LH195	87.9343	0.0277815277843799	18.89	10.3336964715599	0.0689655	245.979337522633	189.2875	0.0298442798671481	67	1.74795566310719	67	1.2226695356424	NA	NA	9.1853	1.32190412782956
DEH1_2014	B73/MO17	105.4479	0.029243713457242	17.7188	10.8114707260686	0	258.347534348706	213.236	0.034007128233359	65	1.99350797775867	66	1.34011244533907	NA	NA	14.6005	1.31864181091877
DEH1_2014	B73/PHG35	105.3965	0.0292893473404002	18.1524	9.36880373817727	0.1484326	258.347534348706	202.7172	0.0327863808498996	65	1.99350797775867	66	1.34011244533907	NA	NA	11.7462	1.32310252996005
DEH1_2014	B73/PHM49	117.5372	0.0301506868850121	20.1164	11.2126629678435	0	258.347534348706	206.1137	0.036007889953116	65	1.99350797775867	67	1.34011244533907	NA	NA	12.8959	1.32303595206391
DEH1_2014	B73/PHN82	121.4652	0.0287797689784665	20.3979	8.63101628393604	0.391092	258.347534348706	221.152	0.0305627578912005	66	1.99350797775867	68.5	1.34011244533907	NA	NA	11.5374	1.31864181091877
DEH1_2014	B73/TX205	122.3546	0.0300080810001426	20.6993	9.94387980727334	0.1157165	258.347534348706	227.4138	0.035403337263896	68.5	1.99350797775867	68.5	1.34011244533907	NA	NA	12.6278	1.32263648468708
DEH1_2014	B73_NC230-041-1-1-1-1/LH195	91.7838	0.0290402623948282	21.3788	8.93856314674474	0.0599065	260.624134625626	186.1311	0.0315872543329048	67.5	2.01918123831246	70	1.35545221073089	NA	NA	11.2741	1.32010652463382
DEH1_2014	B73_NC230-126-1-1-1-1/LH195	100.1893	0.0293349812235585	21.6136	8.81058790000136	0.1116306	260.624134625626	192.673	0.0319706089267568	70	2.01918123831246	70	1.35545221073089	NA	NA	10.9007	1.32010652463382
DEH1_2014	B73_NC230-127-1-1-1-1/LH195	83.3161	0.0293596995769359	23.024	9.45310489277807	0.1091954	260.624134625626	178.9981	0.0327597705527125	68.5	2.01918123831246	68.5	1.35545221073089	NA	NA	11.6818	1.31864181091877
DEH1_2014	B73_NC230-128-1-1-1-1/LH195	106.5432	0.0293596995769359	21.1546	10.8273152804273	0.2738506	260.624134625626	204.1901	0.0341235482835527	70	2.01918123831246	70	1.35545221073089	NA	NA	10.1565	1.31864181091877
DEH1_2014	B73_NC230-129-1-1-1-1/LH195	110.4419	0.0285554023862718	21.396	10.3661981215265	0.1076684	260.624134625626	193.7205	0.0315939069072016	67.5	2.01918123831246	70	1.35545221073089	NA	NA	11.1667	1.31697736351531
DEH1_2014	CG60/LH162	95.018	0.0303579407710225	17.0973	9.95180208445269	0.0617555	258.347534348706	165.5497	0.0359704692226966	54	1.99350797775867	55	1.34011244533907	NA	NA	6.9163	1.32310252996005
DEH1_2014	CG60/LH82	88.8363	0.026115891049104	17.3735	8.1053020957267	0	258.347534348706	163.4387	0.0250560895170397	55.5	1.99350797775867	55	1.34011244533907	NA	NA	8.5901	1.31711051930759
DEH1_2014	CG65/LH185	72.5525	0.0277073727242478	17.4799	7.90216678343561	0.0267857	254.486633294281	173.725	0.0280081693612364	63	1.94029807483673	64	1.31054348580551	NA	NA	7.3675	1.3211051930759
DEH1_2014	CGR01/LH185	95.1678	0.0146793839425774	17.2312	5.48526283779625	0	127.11566727021	186.2976	0.0172318305722378	63.0103	0.968081097689241	63.1793	0.654179079614076	NA	NA	10.8503	0.659913648468708
DEH1_2014	CGR01/LH198	102.9086	0.0303199125350573	17.3335	11.3101679177432	0.0508772	258.347534348706	181.0363	0.0370905964199171	61	1.99350797775867	61	1.34011244533907	NA	NA	8.754	1.31997336884154
DEH1_2014	CGR01/LH82	90.0322	0.0304168845367685	17.4427	9.82971776176575	0.1091954	258.347534348706	179.7996	0.0357550921298383	61	1.99350797775867	63	1.34011244533907	NA	NA	9.374	1.32330226364847
DEH1_2014	CGR03/LH185	82.8898	0.0112482083947331	18.9869	3.49839634827712	0.0090845	127.375998508893	172.57	0.00875645091813841	62.9897	0.972169253868795	64.8207	0.656350940515027	NA	NA	6.8805	0.659057390146471
DEH1_2014	LH132/LH51	87.8106	0.0287683605076769	19.9086	10.5733961400634	0.0847458	258.347534348706	195.6104	0.0329859580788031	63	1.99350797775867	64	1.34011244533907	NA	NA	11.4994	1.31711051930759
DEH1_2014	LH195/LH185	78.1914	0.0267205400009507	20.4933	6.57772454729772	0.0357143	254.486633294281	175.631	0.024615356469878	67	1.94029807483673	67	1.31054348580551	NA	NA	12.505	1.3211051930759
DEH1_2014	LH74/PHG35	100.3911	0.0293482911061463	17.4429	10.6733387137106	0.1180556	258.347534348706	201.5941	0.0340262543844623	63	1.99350797775867	64	1.34011244533907	NA	NA	10.5358	1.32303595206391
DEH1_2014	LH74/PHM49	97.8976	0.0301392784142226	18.1053	9.93209795916046	0	258.347534348706	191.2755	0.0354399264225283	63	1.99350797775867	65	1.34011244533907	NA	NA	11.0735	1.32097203728362
DEH1_2014	LH74/PHN82	98.0982	0.0287797689784665	18.799	9.27251760015129	0.0257211	258.347534348706	186.1892	0.0314824762877305	61	1.99350797775867	62	1.34011244533907	NA	NA	9.6613	1.3211051930759
DEH1_2014	LH74/TX205	113.2497	0.0304682226553216	18.0931	9.96642782693765	0.1216123	258.347534348706	204.604	0.0360087215249031	65	1.99350797775867	66	1.34011244533907	NA	NA	12.0178	1.32183754993342
DEH1_2014	M0001/LH185	83.5385	0.0294129391072872	17.5478	8.08966067668029	0.0272727	260.797209500479	178.9979	0.0315523283178467	62	2.02104462012684	64	1.35656278198098	NA	NA	9.7038	1.32396804260985
DEH1_2014	M0001/LH195	94.7722	0.030354137947426	20.8409	11.4639413491476	0.1424165	256.457024177229	180.1371	0.0373949516939949	67.5	1.96907697174782	68.5	1.32623030471299	NA	NA	9.188	1.31884154460719
DEH1_2014	M0007/LH195	99.0541	0.0300879402956695	22.8959	11.0150123089842	0.179627	256.457024177229	189.5322	0.0354607157172057	68.5	1.96907697174782	68.5	1.32623030471299	NA	NA	12.4167	1.3211051930759
DEH1_2014	M0008/LH185	78.1734	0.0141512382944336	18.1929	3.62169948283781	0.0102043	130.424100010651	174.2799	0.013997847892215	63.4233	1.01080854621435	63.304	0.678468314014021	NA	NA	8.2802	0.660657789613848
DEH1_2014	M0010/LH195	103.1879	0.0301811094737843	20.2254	11.163504222269	0.0825312	256.457024177229	209.056	0.036757136133291	67	1.96907697174782	68.5	1.32623030471299	NA	NA	11.4504	1.32003994673768
DEH1_2014	M0012/LH185	85.4476	0.0286942054475448	18.5634	9.7943722174271	0.0227041	260.797209500479	194.9668	0.0319606300653116	62	2.02104462012684	63	1.35656278198098	NA	NA	11.1549	1.26857523302264
DEH1_2014	M0014/LH185	88.764	0.0151473499073062	17.499	4.2213549247211	0.0102043	130.424100010651	177.3861	0.0172659250155088	61.4233	1.01080854621435	61.304	0.678468314014021	NA	NA	8.421	0.661957723035952
DEH1_2014	M0015/LH195	96.6099	0.0300955459428626	23.4216	11.3426695677098	0.4181818	256.457024177229	202.8953	0.0359804480841418	67	1.96907697174782	68.5	1.32623030471299	NA	NA	9.7512	1.3228362183755
DEH1_2014	M0022/LH185	93.9864	0.030135475590626	17.806	10.3481190787326	0.0086207	260.797209500479	189.6592	0.0356852400997221	64	2.02104462012684	65	1.35656278198098	NA	NA	11.0561	1.32390146471372
DEH1_2014	M0027/LH185	69.2947	0.0279298379046442	19.0829	9.97739713380137	0.0271164	260.797209500479	177.1517	0.0299723419223611	61	2.02104462012684	61	1.35656278198098	NA	NA	11.4679	1.32383488681758
DEH1_2014	M0028/LH185	84.7038	0.027110329419594	18.0229	9.0261144663422	0.0196154	260.797209500479	179.827	0.0280530742377397	63	2.02104462012684	65	1.35656278198098	NA	NA	9.4934	1.31451398135819
DEH1_2014	M0030/LH185	89.3315	0.0293007558111898	18.0798	10.660338053724	0.0089286	260.797209500479	177.1112	0.0339497497800493	63	2.02104462012684	65	1.35656278198098	NA	NA	13.1017	1.32303595206391
DEH1_2014	M0033/LH195	102.9666	0.0286846983885535	21.1632	10.6052883840931	0.246633	256.457024177229	203.4975	0.032687423807235	68.5	1.96907697174782	70	1.32623030471299	NA	NA	9.6982	1.32250332889481
DEH1_2014	M0035/LH185	90.7929	0.029338784047155	16.3343	7.41545457518617	0.0089286	260.797209500479	191.0165	0.0306484097852715	62	2.02104462012684	64	1.35656278198098	NA	NA	8.2849	1.32390146471372
DEH1_2014	M0039/LH195	113.6996	0.0275932880163521	20.0475	8.90565522615359	0.1372354	256.457024177229	219.0037	0.0287166685238437	67.5	1.96907697174782	69	1.32623030471299	NA	NA	11.333	1.3228362183755
DEH1_2014	M0041/LH185	110.0732	0.0151430222940533	16.5659	5.29573759142867	0.045292	130.424100010651	198.3046	0.017914551009445	61.4233	1.01080854621435	65.304	0.678468314014021	NA	NA	8.8716	0.661759187749667
DEH1_2014	M0042/LH185	93.4958	0.0151619299329752	19.0561	4.2213549247211	0.0791698	130.424100010651	186.268	0.0172700828744443	63.4233	1.01080854621435	65.304	0.678468314014021	NA	NA	11.2687	0.661321371504661
DEH1_2014	M0045/LH185	87.0515	0.0304282930075581	20.638	10.3572601677857	0.0089286	260.797209500479	185.8796	0.0361309625776064	62	2.02104462012684	64	1.35656278198098	NA	NA	10.4184	1.32303595206391
DEH1_2014	M0051/LH185	88.9445	0.0288444169796074	17.5224	9.46448047026637	0.0683913	260.797209500479	187.3292	0.0314400661265885	62	2.02104462012684	63	1.35656278198098	NA	NA	10.1541	1.32130492676431
DEH1_2014	M0052/LH185	87.3703	0.0292170936920664	17.9895	8.22047981779575	0.0083333	260.797209500479	186.8755	0.0314733289980724	63	2.02104462012684	65	1.35656278198098	NA	NA	7.1475	1.32130492676431
DEH1_2014	M0057/LH195	103.4113	0.0303598421828207	21.8986	10.3322745243739	0.5545455	256.457024177229	215.9265	0.036093541847187	70	1.96907697174782	70	1.32623030471299	NA	NA	11.0097	1.3228362183755
DEH1_2014	M0058/LH185	89.6817	0.0302362504159338	19.054	11.2819321093347	0.0432649	260.797209500479	202.9659	0.0365534010454521	63	2.02104462012684	63	1.35656278198098	NA	NA	11.4753	1.32130492676431
DEH1_2014	M0058/LH195	89.418	0.0304853353615059	21.5086	11.4375337585497	0.0878845	256.457024177229	187.4866	0.0373217733767303	64	1.96907697174782	67.5	1.32623030471299	NA	NA	10.6227	1.32256990679095
DEH1_2014	M0066/LH195	84.2957	0.0304910395969007	20.3835	11.4633319432107	0.0512821	256.457024177229	173.1698	0.0374398565704982	67	1.96907697174782	70	1.32623030471299	NA	NA	12.3752	1.30912117177097
DEH1_2014	M0075/LH185	87.2252	0.0304530113609355	17.6213	11.3132149474276	0.1378632	260.797209500479	182.6459	0.037200363895814	62	2.02104462012684	63	1.35656278198098	NA	NA	8.9869	1.32230359520639
DEH1_2014	M0076/LH185	94.1208	0.0289375861577221	19.6906	8.55829384213583	0.0465909	260.797209500479	192.3284	0.0309985015076397	63	2.02104462012684	65	1.35656278198098	NA	NA	12.6473	1.24074567243675
DEH1_2014	M0083/LH185	90.3336	0.0276389218995104	17.4609	8.99991001105666	0.0714286	260.797209500479	178.3395	0.0290642655308505	62	2.02104462012684	63	1.35656278198098	NA	NA	11.4377	1.32130492676431
DEH1_2014	M0088/LH185	92.7687	0.0287379379189048	18.6109	9.12382255155422	0.0526316	260.797209500479	191.9634	0.0312962042074206	63	2.02104462012684	66	1.35656278198098	NA	NA	10.3301	1.32230359520639
DEH1_2014	M0099/LH185	98.9625	0.0262603983457717	18.485	7.51580341945797	0.0677966	260.797209500479	202.2949	0.0245105784247037	65	2.02104462012684	66.5	1.35656278198098	NA	NA	9.8211	1.32010652463382
DEH1_2014	M0099/LH195	112.2648	0.0272814564814375	20.629	10.0828243608804	0.136616	256.457024177229	224.0692	0.0295058301497993	71	1.96907697174782	70	1.32623030471299	NA	NA	11.4938	1.31904127829561
DEH1_2014	M0101/LH185	93.331	0.0305423777154537	17.204	8.77930506190853	0.1383172	260.797209500479	178.4485	0.0344644927162627	63	2.02104462012684	64	1.35656278198098	NA	NA	10.9327	1.32230359520639
DEH1_2014	M0106/LH185	93.5385	0.0288938536863621	18.3459	9.43563525592104	0.0490196	260.797209500479	188.461	0.0321660282967248	62	2.02104462012684	65.5	1.35656278198098	NA	NA	12.1995	1.32343541944075
DEH1_2014	M0118/LH185	91.0289	0.0273023720112183	18.8511	8.86279367526017	0.0083333	260.797209500479	186.1471	0.0283008826302948	64	2.02104462012684	65	1.35656278198098	NA	NA	10.9791	1.32010652463382
DEH1_2014	M0143/LH185	96.3142	0.0279887816703903	18.7143	7.77053510107099	0.1253374	260.797209500479	176.7972	0.0284239552547853	62	2.02104462012684	63	1.35656278198098	NA	NA	11.2392	1.32343541944075
DEH1_2014	M0143/LH195	105.803	0.030500546655892	20.8786	11.3371849142779	0.2474074	256.457024177229	200.1176	0.0370199128180138	67.5	1.96907697174782	68.5	1.32623030471299	NA	NA	11.608	1.31731025299601
DEH1_2014	M0151/LH185	85.6614	0.0271312449493749	19.0352	7.9411687633955	0.0448916	260.797209500479	172.8768	0.0266360759125253	62	2.02104462012684	64	1.35656278198098	NA	NA	8.6127	1.3228362183755
DEH1_2014	M0154/LH185	85.5376	0.0284204021485953	17.5881	10.5557233678941	0.3817302	260.797209500479	177.1123	0.0309602492054332	62	2.02104462012684	63	1.35656278198098	NA	NA	7.65	1.32230359520639
DEH1_2014	M0154/LH195	92.7964	0.03007653182488	20.7055	10.2991634684705	0.1160714	256.457024177229	193.5447	0.0350357825339988	66	1.96907697174782	68.5	1.32623030471299	NA	NA	9.405	1.32256990679095
DEH1_2014	M0159/LH185	96.1685	0.0152727061843419	18.3226	5.61080046079214	0.0102043	130.424100010651	182.3996	0.0185232615576005	61.4233	1.01080854621435	67.304	0.678468314014021	NA	NA	10.5007	0.66056258322237
DEH1_2014	M0163/LH185	99.1826	0.0288425155678091	19.0271	9.2176710658327	0	260.797209500479	187.5498	0.0313810245297046	65	2.02104462012684	66	1.35656278198098	NA	NA	11.3186	1.32097203728362
DEH1_2014	M0164/LH195	98.3574	0.0291961781622855	21.6301	9.89573673826035	0.0090909	256.457024177229	208.4305	0.0330940624111258	70	1.96907697174782	70	1.32623030471299	NA	NA	12.3742	1.32290279627164
DEH1_2014	M0172/LH185	79.4649	0.0151423948281599	17.7418	5.74547917284113	0	130.367770795612	174.171	0.0187278282172265	62.5767	1.01021940699737	64.696	0.678107864232665	NA	NA	9.4773	0.659587217043941
DEH1_2014	M0266/LH185	86.0476	0.0150948975614394	16.3245	4.59207686965234	0.0424273	130.367770795612	178.3671	0.0173806819221283	62.5767	1.01021940699737	64.696	0.678107864232665	NA	NA	7.3642	0.66174414114514
DEH1_2014	M0269/LH185	93.0745	0.0151420164472121	16.4595	5.44260442221512	0.0248834	130.367770795612	188.5154	0.0182064327067163	62.5767	1.01021940699737	62.696	0.678107864232665	NA	NA	9.7431	0.66174414114514
DEH1_2014	M0272/LH185	87.4363	0.0280914579074963	16.9173	9.24062535612159	0.0096154	260.797209500479	178.0158	0.0299515526276837	63	2.02104462012684	65	1.35656278198098	NA	NA	9.7678	1.30446071904128
DEH1_2014	M0287/LH185	106.7208	0.0281998383799971	17.6982	10.1847982876506	0.0363636	260.797209500479	196.546	0.0307673245508265	64	2.02104462012684	65	1.35656278198098	NA	NA	10.9839	1.32390146471372
DEH1_2014	M0296/LH185	85.1995	0.0293140656937776	17.6739	9.78584053431087	0.0377358	260.797209500479	188.4011	0.0331231674236742	64	2.02104462012684	65	1.35656278198098	NA	NA	9.5287	1.32343541944075
DEH1_2014	M0297/LH185	87.2648	0.0305423777154537	17.5689	8.47074252253837	0.0281818	260.797209500479	189.1317	0.034348072666069	63	2.02104462012684	65	1.35656278198098	NA	NA	11.0397	1.31970705725699
DEH1_2014	M0311/LH185	96.838	0.0304092788895755	17.7874	11.2138817797172	0.0603448	260.797209500479	182.6058	0.0370348811101816	63	2.02104462012684	65	1.35656278198098	NA	NA	9.6491	1.32230359520639
DEH1_2014	M0317/LH185	91.9637	0.030544279127252	18.9828	10.2071431720026	0	260.797209500479	181.1317	0.0359297222051288	63	2.02104462012684	63	1.35656278198098	NA	NA	9.521	1.31817576564581
DEH1_2014	M0317/LH195	95.1378	0.028739839330703	20.9047	10.724528812408	6.0181967e-17	256.457024177229	196.1226	0.0329136113333256	67	1.96907697174782	69	1.32623030471299	NA	NA	9.7361	1.30652463382157
DEH1_2014	M0321/LH195	89.7223	0.0294870941674193	20.0712	10.8614420128922	0.1185249	256.457024177229	199.118	0.0341069168478107	70	1.96907697174782	68.5	1.32623030471299	NA	NA	9.7582	1.32190412782956
DEH1_2014	M0323/LH185	92.8382	0.0286923040357465	17.9322	10.5924908594188	0.1726695	260.797209500479	172.0748	0.0327356549708867	61	2.02104462012684	62	1.35656278198098	NA	NA	11.846	1.32230359520639
DEH1_2014	M0325/LH185	94.3772	0.0285668108570614	18.9246	10.5782713875584	0.0258621	260.797209500479	194.9804	0.0323107217876798	64	2.02104462012684	66	1.35656278198098	NA	NA	11.2211	1.32130492676431
DEH1_2014	M0325/LH195	109.5174	0.0291714598089081	21.6007	10.8262996038658	0.0765152	256.457024177229	209.2094	0.0342150211801334	69.5	1.96907697174782	70	1.32623030471299	NA	NA	11.9558	1.32123834886818
DEH1_2014	M0326/LH195	99.0064	0.0304016732423825	20.4221	11.2136786444049	0.0868227	256.457024177229	203.3625	0.0369974603797622	68.5	1.96907697174782	70	1.32623030471299	NA	NA	10.0982	1.32203728362184
DEH1_2014	M0346/LH185	91.451	0.0303921661833912	17.4453	11.304480128999	0.0168079	260.797209500479	191.13	0.0367047471107038	63	2.02104462012684	64	1.35656278198098	NA	NA	10.4732	1.31704394141145
DEH1_2014	M0352/LH185	92.3045	0.0301259685316347	17.9957	9.92986347072526	0.0090909	260.797209500479	174.4458	0.0352170651835861	61	2.02104462012684	61	1.35656278198098	NA	NA	11.5094	1.3228362183755
DEH1_2014	M0355/LH185	90.2549	0.0301735038265912	17.2139	10.0519477934122	0.0192308	260.797209500479	179.9406	0.0352470017679216	63	2.02104462012684	63	1.35656278198098	NA	NA	10.1941	1.32343541944075
DEH1_2014	M0369/LH185	89.0331	0.0292817416932072	18.144	10.8240651154306	0.0086207	260.797209500479	190.1171	0.0341792635932882	63	2.02104462012684	64	1.35656278198098	NA	NA	9.0563	1.32303595206391
DEH1_2014	M0378/LH185	88.0784	0.0149930769596425	16.2138	5.7302440244193	0.023129	130.367770795612	179.6517	0.0183735786359229	62.5767	1.01021940699737	64.696	0.678107864232665	NA	NA	7.2555	0.659775233022637
DEH1_2014	M0382/LH195	91.6786	0.0291904739268907	19.9924	9.8354055505099	0.0266348	256.457024177229	180.2784	0.0328387698724868	67	1.96907697174782	70	1.32623030471299	NA	NA	10.1648	1.32290279627164
DEH1_2014	MOG_LH123HT-059-1-1-1-1-B/LH195	110.8281	0.0257622284546276	21.3936	9.37896050379183	0.0911306	260.624134625626	212.9107	0.0254228126751498	69	2.01918123831246	69	1.35545221073089	NA	NA	13.6739	1.32390146471372
DEH1_2014	MOG_LH145_0057/PB80	101.4402	0.0290402623948282	18.3848	10.7411859080159	0.8043103	260.624134625626	204.8853	0.0334067334030745	62	2.01918123831246	66	1.35545221073089	NA	NA	9.4472	1.31864181091877
DEH1_2014	MOG_LH145_0131/LH195	91.3251	0.0581489756143937	19.0213	19.4770200130941	0.3408514	509.931835126212	188.5348	0.0658338752409479	63.5	3.93597999804552	65	2.64538071770667	NA	NA	10.231	2.38981358189081
DEH1_2014	MOG_MO45-030-1-1-1-1-B/LH195	94.6405	0.0305100537148833	21.4933	11.3562796336333	0.2850282	260.624134625626	183.486	0.0372494266312528	66	2.01918123831246	68.5	1.35545221073089	NA	NA	11.807	1.31697736351531
DEH1_2014	MOG_MO45-054-1-1-1-1-B/LH195	112.0743	0.0304111803013738	20.6924	11.3402319439623	0.7465054	260.624134625626	206.8945	0.0372444372005302	67	2.01918123831246	67.5	1.35545221073089	NA	NA	10.5255	1.3107190412783
DEH1_2014	MOG_MO45-055-1-1-1-1-B/LH195	118.0181	0.0287873746256596	22.0898	10.567505216007	0.3849583	260.624134625626	218.4665	0.0327082131019125	67	2.01918123831246	67.5	1.35545221073089	NA	NA	11.7383	1.31864181091877
DEH1_2014	MOG_MO45-071-1-1-1-1-B/LH195	124.1794	0.0288254028616248	20.9838	10.6061009253423	0.3167825	260.624134625626	218.8819	0.0327705809859448	67	2.01918123831246	70	1.35545221073089	NA	NA	11.0537	1.32376830892144
DEH1_2014	MOG_MO45-074-1-1-1-1-B/LH195	117.9805	0.0302647715929077	20.5761	8.66595555765011	0.4063336	260.624134625626	207.6029	0.0337717934176104	67	2.01918123831246	67.5	1.35545221073089	NA	NA	10.1478	1.32130492676431
DEH1_2014	MOG_MO45-085-1-1-1-1-B/LH195	112.9764	0.0294224461662785	20.9058	9.45818327558535	0.3728814	260.624134625626	211.5466	0.0327963597113448	67.5	2.01918123831246	68.5	1.35545221073089	NA	NA	9.5568	1.31697736351531
DEH1_2014	MOG_NC230-009-1-1-1-1-B/LH195	117.4456	0.0303332224176451	22.3297	10.3678232040248	0.4312789	260.624134625626	235.6802	0.0361426045826258	67.5	2.01918123831246	69	1.35545221073089	NA	NA	12.0723	1.32303595206391
DEH1_2014	MOG_OH43_0300/LH195	106.9574	0.0292304035746542	21.2091	8.59099862741469	0.5916667	260.624134625626	189.6544	0.0319007568966406	65	2.01918123831246	67.5	1.35545221073089	NA	NA	10.6503	1.32223701731025
DEH1_2014	MOG_PHG83-014-1-1-1-1-B/LH195	95.8208	0.0305423777154537	19.3485	8.79799351063931	0.0545455	260.624134625626	191.0668	0.0344628295726885	65	2.01918123831246	67	1.35545221073089	NA	NA	9.0276	1.32083888149134
DEH1_2014	MOG_PHG83-090-1-1-1-1-B/LH195	115.4417	0.0291790654561012	22.0968	10.6520095059201	0.4196429	260.624134625626	213.1696	0.0338765714627847	70	2.01918123831246	70	1.35545221073089	NA	NA	13.042	1.32303595206391
DEH1_2014	MOG_PHG83-129-1-1-1-1-B/LH195	114.8391	0.0592479916337881	20.6214	16.6410479181982	0.1734893	509.931835126212	200.7747	0.0599205682628964	67	3.93597999804552	69.5	2.64538071770667	NA	NA	12.0168	2.63249001331558
DEH1_2014	PB80/LH185	93.8567	0.0276978656652565	18.3426	8.68992552450045	0.0557303	254.486633294281	188.4529	0.0287382893903082	63	1.94029807483673	63	1.31054348580551	NA	NA	10.7628	1.32083888149134
DEH1_2014	PHG39/PHG35	105.7327	0.0287778675666683	19.4132	9.53821858862804	0.0428571	258.347534348706	196.6349	0.0314766552852208	67	1.99350797775867	67.5	1.34011244533907	NA	NA	11.378	1.3211051930759
DEH1_2014	PHG39/PHM49	107.9869	0.0301601939440034	20.562	10.0486976284155	0	258.347534348706	202.3347	0.034628312358321	67	1.99350797775867	70	1.34011244533907	NA	NA	11.4973	1.3211051930759
DEH1_2014	PHG39/PHN82	99.7765	0.0288938536863621	19.5095	9.29770637887539	0	258.347534348706	215.8605	0.0324778677168864	64	1.99350797775867	67.5	1.34011244533907	NA	NA	11.8293	1.31864181091877
DEH1_2014	PHG39/TX205	114.0779	0.0292304035746542	20.6829	9.48824730180443	0.0431034	258.347534348706	222.7955	0.0329651687841256	70	1.99350797775867	70	1.34011244533907	NA	NA	10.5746	1.3211051930759
DEH1_2014	PHN11_LH145_0029/PB80	93.2525	0.0305423777154537	18.042	11.4700354085163	0.0639731	260.624134625626	181.8951	0.0374282145654788	61	2.01918123831246	63	1.35545221073089	NA	NA	9.4032	1.32336884154461
DEH1_2014	PHN11_OH43_0142/LH195	96.0786	0.0293216713409707	20.1685	10.8646921778888	0.0666221	260.624134625626	190.4969	0.0342857047820367	64	2.01918123831246	66	1.35545221073089	NA	NA	10.0639	1.29434087882823
DEH1_2014	PHN11_OH43_0190/LH195	87.7519	0.0271084280077958	19.9891	9.70682089782964	0.1004402	260.624134625626	188.1471	0.0278734547317266	64	2.01918123831246	67	1.35545221073089	NA	NA	9.5663	1.30978695073236
DEH1_2014	PHN11_PHG47_0172/LH195	99.1344	0.0305499833626468	19.013	11.4298146166826	0.1896552	260.624134625626	186.9135	0.0373234365203045	65	2.01918123831246	67	1.35545221073089	NA	NA	9.2	1.32130492676431
DEH1_2014	PHN11_PHG47_0251/LH195	85.1826	0.0274126538955174	18.424	9.99791380034277	0.0177005	260.624134625626	181.5934	0.0294709041347412	65	2.01918123831246	65	1.35545221073089	NA	NA	9.4929	1.32350199733688
DEH1_2014	PHN11_PHW65_0015/LH195	83.6088	0.0282701906165328	20.8122	10.099278321176	0.0096154	260.624134625626	188.9459	0.0308271977194975	65	2.01918123831246	66.5	1.35545221073089	NA	NA	11.9187	1.31804260985353
DEH1_2014	PHN11_PHW65_0065/LH195	86.6169	0.029002234158863	20.0366	9.8423121511278	0.0175439	260.624134625626	187.4424	0.0330732731164483	66	2.01918123831246	67.5	1.35545221073089	NA	NA	10.6387	1.32383488681758
DEH1_2014	PHN11_PHW65_0101/LH195	84.7543	0.0305366734800589	20.5515	11.3516075214506	0.0086207	260.624134625626	199.8355	0.0372535844901883	67	2.01918123831246	68.5	1.35545221073089	NA	NA	11.5032	1.32010652463382
DEH1_2014	PHN11_PHW65_0237/LH195	95.2733	0.0305271664210676	21.049	9.75679218465325	4.3230388e-16	260.624134625626	205.5602	0.0356020829210123	67.5	2.01918123831246	68.5	1.35545221073089	NA	NA	14.2374	1.32223701731025
DEH1_2014	PHN11_PHW65_0275/LH195	99.5735	0.0267015258829681	20.1796	9.94408294258563	0.009434	260.624134625626	193.504	0.0298309747185545	66	2.01918123831246	67.5	1.35545221073089	NA	NA	10.8807	1.32390146471372
DEH1_2014	PHN11_PHW65_0294/LH195	93.7391	0.0269924418881019	21.0856	8.81079103531365	0.0178628	260.624134625626	187.358	0.0270185989345902	65	2.01918123831246	65	1.35545221073089	NA	NA	11.1095	1.32383488681758
DEH1_2014	PHN11_PHW65_0312/LH195	99.6784	0.030135475590626	19.8426	11.3570921748824	0.0090909	260.624134625626	193.8484	0.0363504975294002	66	2.01918123831246	66	1.35545221073089	NA	NA	10.04	1.32376830892144
DEH1_2014	PHN11_PHW65_0323/LH195	80.758	0.0304111803013738	19.7005	10.3544162734136	0.0087719	260.624134625626	173.4545	0.0361251415750968	66	2.01918123831246	67	1.35545221073089	NA	NA	9.9737	1.32390146471372
DEH1_2014	PHN11_PHW65_0359/LH195	84.3819	0.0292151922802681	20.5045	9.57397040359127	3.9153788e-16	260.624134625626	160.3224	0.0326292137821382	66	2.01918123831246	65	1.35545221073089	NA	NA	10.0284	1.32190412782956
DEH1_2014	PHW52/PHG35	95.5059	0.0300270951181252	19.9297	11.0733121436118	0.0180547	258.347534348706	191.1236	0.0362249301895485	65	1.99350797775867	65	1.34011244533907	NA	NA	12.2239	1.32330226364847
DEH1_2014	PHW52/PHM49	104.2895	0.0305157579502781	20.8304	10.1980020829495	0	258.347534348706	200.2314	0.0359222380590449	67	1.99350797775867	68.5	1.34011244533907	NA	NA	12.738	1.32310252996005
DEH1_2014	PHW52/PHN82	88.5299	0.0290554736892142	20.9694	9.44497948028643	0	258.347534348706	196.2795	0.032440446986467	64	1.99350797775867	66	1.34011244533907	NA	NA	12.4245	1.32330226364847
DEH1_2014	PHW52/TX205	109.6208	0.0152102086799449	21.3028	5.58033016394848	0.0790008	129.23251943764	211.0804	0.0185116195525811	69.8349	0.997458968332447	70.036	0.670485041993475	NA	NA	13.541	0.660463914780293
DEH1_2014	PHW65_MOG_0029/LH195	102.0611	0.0304587155963303	20.74	11.3105741883678	0.3692722	260.624134625626	192.0733	0.0372203216187044	67	2.01918123831246	67.5	1.35545221073089	NA	NA	11.2925	1.32336884154461
DEH1_2014	PHW65_MOG_0176/LH195	95.5617	0.0304644198317251	20.2409	11.2002717137937	0.1605588	260.624134625626	197.9709	0.0369916393772525	66	2.01918123831246	67.5	1.35545221073089	NA	NA	11.3472	1.31957390146471
DEH1_2014	PHW65_MOG_0271/PB80	115.2402	0.0289356847459239	19.5241	10.6631819480961	0.3029478	260.624134625626	204.3838	0.0332645346274808	63	2.01918123831246	65	1.35545221073089	NA	NA	10.3686	1.29054593874834
DEH1_2014	REDEAR-B/LH195	112.6451	0.0289337833341256	22.1844	10.5463791435287	0.118239	258.347534348706	218.168	0.0328088332881513	67.5	1.99350797775867	70	1.34011244533907	NA	NA	11.6458	1.32310252996005
DEH1_2014	TX130_RP/LH185	107.0027	0.0133753519988592	20.2277	4.08850443048273	0	127.11566727021	221.7361	0.0133583691879369	67.0103	0.968081097689241	68.1793	0.654179079614076	NA	NA	13.2676	0.65899154460719
DEH1_2014	TX303/LH195	112.7051	0.0269430051813472	24.1681	9.83418673863615	0.1076803	245.979337522633	209.1176	0.0286409954912178	68	1.74795566310719	71	1.2226695356424	NA	NA	13.1522	1.32190412782956
DEH1_2014	TX714/LH185	103.6676	0.0139098312497029	20.3483	3.61479288221991	0.07805	127.375998508893	182.621	0.0139363115799698	64.9897	0.972169253868795	66.8207	0.656350940515027	NA	NA	12.6128	0.660722170439414
DEH1_2014	TX740/LH185	111.7485	0.0290630793364073	24.664	8.17477437253025	0.0163934	254.486633294281	213.813	0.0313610668068142	69	1.94029807483673	70	1.31054348580551	NA	NA	13.0683	1.31391478029294
DEH1_2014	TX772/LH185	77.923	0.0260702571659457	22.1997	7.36629582961173	0.3876004	254.486633294281	171.2976	0.0244615156892649	65	1.94029807483673	66.5	1.31054348580551	NA	NA	10.5715	1.32010652463382
DEH1_2014	TX772W/LH185	83.349	0.0408879593097875	21.4989	13.7792776386414	0.0088766	369.568111619981	173.4111	0.0444475120203702	65.0034	2.77405791556313	65.7264	1.88484764350663	NA	NA	10.9832	1.96930758988016
DEH1_2014	W10004_0076/LH185	82.3246	0.0272871607168322	17.9904	6.86170771388066	0.0090909	254.486633294281	171.0402	0.0264173725325186	63	1.94029807483673	64	1.31054348580551	NA	NA	10.5246	1.31977363515313
DEH1_2014	W10004_0097/LH195	90.9075	0.0274468793078861	17.4276	10.0017733712763	0.1680961	245.979337522633	190.003	0.029698754804406	67	1.74795566310719	65	1.2226695356424	NA	NA	8.302	1.32097203728362
DEH1_2014	W10005_0029/LH185	81.0555	0.0140096648761706	17.7228	2.88919354671614	0.062656	127.375998508893	170.7627	0.0134382000794983	60.9897	0.972169253868795	62.8207	0.656350940515027	NA	NA	10.3608	0.66137516644474
DEH1_2014	W10005_0037/LH185	73.8908	0.0259352569282692	18.8372	6.39246514248825	0.045202	254.486633294281	162.5493	0.0228856871527148	62	1.94029807483673	64	1.31054348580551	NA	NA	9.9247	1.26744340878828
DEH1_2014	W10005_0107/LH185	74.1351	0.0398764082331131	17.9281	12.0940670878745	0.094929	369.568111619981	159.0448	0.0418272293192254	61.0034	2.77405791556313	62.3931	1.88484764350663	NA	NA	9.0036	1.97523302263648
DEH1_2014	W10005_0147/LH185	70.8774	0.0127891467414555	18.8535	3.42628331241378	0.0308237	127.375998508893	159.786	0.0113118710198895	60.9897	0.972169253868795	62.8207	0.656350940515027	NA	NA	9.9219	0.651096404793609
DEH1_2014	W10005_0220/LH185	86.2923	0.0134867081808243	19.5405	3.98104585028074	0.0656883	127.375998508893	155.0615	0.0132519279991884	62.9897	0.972169253868795	62.8207	0.656350940515027	NA	NA	11.0846	0.660661651131824
DEH1_2014	Z013E0002/LH185	96.8496	0.0285116699149118	21.0256	10.3984966361808	0.0347906	259.279475982533	193.6798	0.0318749781712406	66	2.00448122622118	67.5	1.34663705143333	NA	NA	12.6121	1.32270306258322
DEH1_2014	Z013E0006/LH185	101.3509	0.0271141322431906	20.0154	9.79762238242376	0.1448413	259.279475982533	200.7994	0.0280173166508945	65	2.00448122622118	66.5	1.34663705143333	NA	NA	11.9701	1.32330226364847
DEH1_2014	Z013E0007/LH185	103.8717	0.0152150249560299	20.6761	5.73146283629305	0.0165024	129.641974651188	171.4823	0.0187028810636136	66.0368	1.00226514763781	65.8185	0.673315402235025	NA	NA	12.4695	0.646383888149135
DEH1_2014	Z013E0012/LH195	91.2619	0.0290193468650473	24.5662	10.8234557094938	1.0918929e-17	254.233677707956	186.8109	0.0341892424547334	72	1.93615722636031	71	1.30839175400847	NA	NA	9.8224	1.32250332889481
DEH1_2014	Z013E0014/LH185	95.6419	0.0303807577126016	21.4204	10.2843345906732	0.0694192	259.279475982533	203.0174	0.0360744156960838	66	2.00448122622118	67.5	1.34663705143333	NA	NA	12.7153	1.3219707057257
DEH1_2014	Z013E0019/LH195	99.6672	0.0286390645053953	22.4599	10.721075512099	0.0087719	254.233677707956	194.4056	0.0328562328800158	70	1.93615722636031	70	1.30839175400847	NA	NA	9.5986	1.32043941411451
DEH1_2014	Z013E0020/LH185	94.2251	0.0276674430764843	21.2643	10.0612920177776	0.0336207	259.279475982533	199.1245	0.0296247449153543	66.5	2.00448122622118	68.5	1.34663705143333	NA	NA	13.6809	1.31844207723036
DEH1_2014	Z013E0021/LH195	101.7726	0.028447021913771	21.4198	10.7218880533482	0.1462644	254.233677707956	192.5699	0.0328628854543126	70	1.93615722636031	70	1.30839175400847	NA	NA	9.2181	1.31797603195739
DEH1_2014	Z013E0022/LH185	96.375	0.0290992061605742	20.9988	10.8393002638525	0.144697	259.279475982533	196.5389	0.0340512015380752	66	2.00448122622118	68.5	1.34663705143333	NA	NA	11.9558	1.3219707057257
DEH1_2014	Z013E0022/LH195	106.5002	0.0299795598231687	21.2882	10.113904063661	0.0259217	254.233677707956	195.8642	0.03467155409125	70	1.93615722636031	70	1.30839175400847	NA	NA	11.3993	1.31797603195739
DEH1_2014	Z013E0026/LH185	105.797	0.0289413889813186	21.465	9.81671710177912	0.1791555	259.279475982533	198.3713	0.0324454364171896	66	2.00448122622118	66	1.34663705143333	NA	NA	12.2348	1.32097203728362
DEH1_2014	Z013E0026/LH195	111.1022	0.0291942767504872	21.6847	10.8232525741815	0.0688194	254.233677707956	200.2657	0.0342033791751141	67.5	1.93615722636031	70	1.30839175400847	NA	NA	11.453	1.31930758988016
DEH1_2014	Z013E0027/LH195	99.9522	0.0303218139468555	22.9434	11.341450755836	0.0603448	254.233677707956	197.3902	0.0372153321879818	70	1.93615722636031	70	1.30839175400847	NA	NA	10.3518	1.32043941411451
DEH1_2014	Z013E0028/LH185	106.9022	0.0292380092218472	22.2168	9.43238509092438	0.0446953	259.279475982533	204.6373	0.0327689178423706	65	2.00448122622118	66.5	1.34663705143333	NA	NA	11.7051	1.32270306258322
DEH1_2014	Z013E0032/LH185	80.5693	0.0287892760374578	21.0919	9.47585604775467	0.1172078	259.279475982533	183.8954	0.0318126102872083	64	2.00448122622118	66	1.34663705143333	NA	NA	10.4759	1.32350199733688
DEH1_2014	Z013E0034/LH185	90.741	0.0152689375861577	21.5301	5.74547917284113	0.0057198	129.641974651188	175.8841	0.0187369755068846	61.9632	1.00226514763781	64.1815	0.673315402235025	NA	NA	11.4346	0.649069573901465
DEH1_2014	Z013E0036/LH185	100.5618	0.0305233635974711	22.2594	11.1628948163322	0.0769231	259.279475982533	207.3057	0.0370057760976332	66	2.00448122622118	69	1.34663705143333	NA	NA	14.5613	1.31757656458056
DEH1_2014	Z013E0037/LH185	91.6093	0.0305366734800589	21.1816	11.3522169273875	0.0306122	259.279475982533	184.5445	0.0372011954676011	66	2.00448122622118	66	1.34663705143333	NA	NA	10.4988	1.32230359520639
DEH1_2014	Z013E0037/LH195	99.7686	0.0300270951181252	21.4503	11.3652175873741	5.8231766e-18	254.233677707956	196.9979	0.0359929216609482	70	1.93615722636031	71.5	1.30839175400847	NA	NA	9.2443	1.32137150466045
DEH1_2014	Z013E0039/LH185	101.0767	0.0305214621856729	22.219	10.3678232040248	0.051578	259.279475982533	199.9509	0.0361567413030065	66	2.00448122622118	67.5	1.34663705143333	NA	NA	12.9124	1.31984021304927
DEH1_2014	Z013E0044/LH195	104.5853	0.0299757569995722	23.0096	10.2349727097865	0.1001984	254.233677707956	209.1766	0.0347946267157405	71.5	1.93615722636031	70	1.30839175400847	NA	NA	10.1341	1.32250332889481
DEH1_2014	Z013E0045/LH185	91.8888	0.0303807577126016	22.0821	10.1579844264281	1.5795677e-13	259.279475982533	194.4808	0.035786691857748	66	2.00448122622118	68.5	1.34663705143333	NA	NA	13.6927	1.32350199733688
DEH1_2014	Z013E0046/LH185	88.043	0.0301145600608452	23.4133	11.1438000969768	0.0185185	259.279475982533	196.0247	0.0362706666378388	66	2.00448122622118	67	1.34663705143333	NA	NA	13.6142	1.32350199733688
DEH1_2014	Z013E0046/LH195	98.4613	0.0269220896515663	24.8634	9.98186611067177	0.0258621	254.233677707956	185.0793	0.0283316507864174	70	1.93615722636031	70	1.30839175400847	NA	NA	11.786	1.32043941411451
DEH1_2014	Z013E0047/LH195	106.923	0.0287949802728526	21.4947	10.514486899499	0.0269537	254.233677707956	207.3691	0.0326974026686802	70.5	1.93615722636031	70	1.30839175400847	NA	NA	9.4681	1.32270306258322
DEH1_2014	Z013E0052/LH185	92.7127	0.030449208537339	23.1574	10.354010002789	0.2097458	259.279475982533	184.0537	0.0361234784315226	66	2.00448122622118	67	1.34663705143333	NA	NA	11.7908	1.32350199733688
DEH1_2014	Z013E0055/LH185	102.1177	0.0296924466416314	21.9839	10.0403690806116	0.0962382	259.279475982533	197.5787	0.0344844504391531	66	2.00448122622118	66	1.34663705143333	NA	NA	13.2997	1.32316910785619
DEH1_2014	Z013E0056/LH185	89.7399	0.0291657555735133	22.6682	10.739154554893	0.0258621	259.279475982533	185.5595	0.0339996440872751	66	2.00448122622118	66	1.34663705143333	NA	NA	12.512	1.32316910785619
DEH1_2014	Z013E0059/LH185	97.199	0.0304777297143129	20.5433	11.4399713822972	0.2816764	259.279475982533	183.1737	0.0373483836739174	64	2.00448122622118	65	1.34663705143333	NA	NA	10.2279	1.32350199733688
DEH1_2014	Z013E0062/LH195	95.17	0.0304606170081285	22.7117	11.3416538911483	0.0508475	254.233677707956	203.9084	0.0372319636237237	70	1.93615722636031	70	1.30839175400847	NA	NA	8.8196	1.31797603195739
DEH1_2014	Z013E0063/LH185	85.7709	0.0291733612207064	20.5981	10.670088548714	0.1172414	259.279475982533	191.0363	0.0336287630702296	65	2.00448122622118	66	1.34663705143333	NA	NA	12.7254	1.32316910785619
DEH1_2014	Z013E0067/LH185	85.303	0.0290269525122403	20.3185	10.7086842580493	0.1363636	259.279475982533	185.3034	0.033717741251449	66	2.00448122622118	67	1.34663705143333	NA	NA	12.7177	1.32230359520639
DEH1_2014	Z013E0072/LH185	89.6195	0.0303484337120312	21.2872	10.3125703990817	0.1732804	259.279475982533	198.3424	0.0360744156960838	64	2.00448122622118	65	1.34663705143333	NA	NA	11.4617	1.32330226364847
DEH1_2014	Z013E0073/LH185	99.8164	0.0305290678328659	24.9756	11.3438883795835	0.6019737	259.279475982533	200.158	0.0372161637597689	67	2.00448122622118	67.5	1.34663705143333	NA	NA	10.7796	1.32316910785619
DEH1_2014	Z013E0074/LH195	94.4931	0.030456814184532	22.4195	11.463535078523	0.0170953	254.233677707956	195.7156	0.0374057621272272	70	1.93615722636031	70	1.30839175400847	NA	NA	10.3734	1.31930758988016
DEH1_2014	Z013E0078/LH185	87.0337	0.0305347720682607	21.7183	11.4911614809946	0.0087719	259.279475982533	180.7206	0.0374739510137692	65	2.00448122622118	67.5	1.34663705143333	NA	NA	12.0995	1.31984021304927
DEH1_2014	Z013E0079/LH185	95.3325	0.0304168845367685	20.6245	11.4911614809946	0.137931	259.279475982533	198.2669	0.0374664668676853	64	2.00448122622118	66	1.34663705143333	NA	NA	11.9708	1.31984021304927
DEH1_2014	Z013E0080/LH185	96.8279	0.0305366734800589	21.9251	9.78482485774942	0.0083333	259.279475982533	200.7484	0.0356378405078575	66	2.00448122622118	66	1.34663705143333	NA	NA	12.5106	1.31984021304927
DEH1_2014	Z013E0082/LH185	105.2317	0.0303864619479964	21.9849	10.3261804650052	0.0222222	259.279475982533	196.1188	0.0360976997061225	65	2.00448122622118	67.5	1.34663705143333	NA	NA	12.6575	1.27709720372836
DEH1_2014	Z013E0087/LH185	82.8967	0.0300632219422922	20.911	10.2160811257434	0.0320062	259.279475982533	187.4771	0.0349201940555922	65	2.00448122622118	65	1.34663705143333	NA	NA	14.2626	1.30525965379494
DEH1_2014	Z013E0088/LH195	94.2424	0.0304701240671198	21.3294	10.3310557125002	0.1057331	254.233677707956	205.4724	0.0360968681343354	70	1.93615722636031	70	1.30839175400847	NA	NA	10.993	1.32250332889481
DEH1_2014	Z013E0090/LH185	82.0831	0.0292266007510577	22.1426	9.93778574790461	0.1696429	259.279475982533	177.6074	0.0333285656550873	65	2.00448122622118	66	1.34663705143333	NA	NA	9.851	1.32343541944075
DEH1_2014	Z013E0093/LH185	103.4802	0.0301126586490469	21.7761	11.1257210541829	0.261396	259.279475982533	172.4334	0.035548030754851	63	2.00448122622118	65	1.34663705143333	NA	NA	11.8741	1.32037283621838
DEH1_2014	Z022E0003/LH185	102.8737	0.0302210391215477	17.9171	10.0314311268708	0.0909398	258.89338587709	186.7552	0.0350432666800827	63	1.99992629289712	64	1.34393003401124	NA	NA	13.2101	1.3228362183755
DEH1_2014	Z022E0005/LH185	112.9891	0.0304815325379094	18.1512	10.3531974615399	0.0857143	258.89338587709	192.7111	0.0361334572929677	61	1.99992629289712	64	1.34393003401124	NA	NA	10.5968	1.3202396804261
DEH1_2014	Z022E0006/LH185	96.8063	0.0305328706564624	18.7187	10.2028773304445	0.0281272	258.89338587709	173.9986	0.0359114276258127	64	1.99992629289712	65	1.34393003401124	NA	NA	9.6267	1.32130492676431
DEH1_2014	Z022E0008/LH185	85.6907	0.0152193202452821	19.1193	5.73816630159866	0.0744994	129.547875173075	202.1127	0.0187195124993555	62.7773	1.0011821087188	65.0162	0.672673353231068	NA	NA	10.4179	0.661147603195739
DEH1_2014	Z022E0009/LH185	100.5733	0.0293939249893046	18.3199	9.84007766269259	1.3757499e-17	258.89338587709	194.5269	0.0331023781289967	63	1.99992629289712	64	1.34393003401124	NA	NA	11.9156	1.31737683089214
DEH1_2014	Z022E0017/LH185	88.1961	0.0304853353615059	17.0653	9.97699086317679	0.0446429	258.89338587709	193.2835	0.03582910201889	63	1.99992629289712	65	1.34393003401124	NA	NA	10.0054	1.32323568575233
DEH1_2014	Z022E0017/LH195	96.2739	0.0301563911204069	20.0393	9.93189482384817	0.145675	252.343167536479	195.2004	0.0359114276258127	67.5	1.90375508703235	69	1.29173318525717	NA	NA	10.0156	1.31877496671105
DEH1_2014	Z022E0023/LH185	100.0846	0.0299567428815896	19.9358	8.59485819834823	1.0288013e-17	258.89338587709	181.3724	0.0340437173919913	63	1.99992629289712	65	1.34393003401124	NA	NA	12.3042	1.32190412782956
DEH1_2014	Z022E0025/LH185	90.5638	0.0305119551266816	19.7063	11.3501855742645	0.1586207	258.89338587709	191.4914	0.0372560792055496	63	1.99992629289712	65	1.34393003401124	NA	NA	11.1231	1.31837549933422
DEH1_2014	Z022E0027/LH185	86.7349	0.0299225174692209	19.0372	11.3631862342512	0.0792607	258.89338587709	186.5583	0.0362024777512968	64	1.99992629289712	65	1.34393003401124	NA	NA	11.0432	1.32310252996005
DEH1_2014	Z022E0042/LH185	84.3232	0.0286542757997813	18.5902	10.4791413551604	0.2305528	258.89338587709	181.5244	0.0324803624322477	64	1.99992629289712	65	1.34393003401124	NA	NA	9.8736	1.32323568575233
DEH1_2014	Z022E0046/LH185	84.8847	0.0268916670627941	18.9149	8.90524895552901	0.0255747	258.89338587709	187.3998	0.0268115375596029	63	1.99992629289712	65	1.34393003401124	NA	NA	10.053	1.31837549933422
DEH1_2014	Z022E0048/LH185	92.0909	0.0301183628844417	19.4273	10.0673860771463	0.0263158	258.89338587709	194.3707	0.0349077204787858	63	1.99992629289712	65	1.34393003401124	NA	NA	11.4791	1.32263648468708
DEH1_2014	Z022E0048/LH195	78.6553	0.0275495555449922	21.0568	7.76017520014414	0.104064	252.343167536479	192.0546	0.0273553855083648	67	1.90375508703235	68.5	1.29173318525717	NA	NA	10.9739	1.32170439414115
DEH1_2014	Z022E0051/LH185	100.0713	0.0140737709749489	18.6062	4.95812670240088	0	129.343633507296	198.5063	0.0153225417490616	63.2227	0.998787352523681	64.9838	0.671262511279239	NA	NA	12.3736	0.660213581890812
DEH1_2014	Z022E0053/LH185	91.0101	0.0291410372201359	19.9399	10.6392119812457	0.1440678	258.89338587709	173.268	0.0338607715988298	64	1.99992629289712	66	1.34393003401124	NA	NA	9.124	1.31837549933422
DEH1_2014	Z022E0059/LH185	94.4062	0.0304720254789181	18.8729	10.2231908616736	0.2602171	258.89338587709	194.8675	0.0358989540490062	63	1.99992629289712	64	1.34393003401124	NA	NA	11.3072	1.32336884154461
DEH1_2014	Z022E0073/LH185	94.41	0.0272814564814375	18.8184	8.72100522728099	0.0420904	258.89338587709	190.6429	0.0276830247924813	64	1.99992629289712	65	1.34393003401124	NA	NA	8.4426	1.3167776298269
DEH1_2014	Z022E0073/LH195	88.5701	0.0303085040642677	20.9656	9.65624020506916	0.1188596	252.343167536479	192.885	0.0354191371278508	67.5	1.90375508703235	68.5	1.29173318525717	NA	NA	10.5554	1.31877496671105
DEH1_2014	Z022E0077/LH185	82.3798	0.0292741360460142	17.9529	9.72449366999897	0.0283019	258.89338587709	184.6455	0.0332296086124227	64	1.99992629289712	65	1.34393003401124	NA	NA	9.3213	1.32323568575233
DEH1_2014	Z022E0077/LH195	89.4196	0.0261976517564291	22.0846	9.83784317425739	0.0512821	252.343167536479	195.5216	0.0265969920385317	67.5	1.90375508703235	68.5	1.29173318525717	NA	NA	9.8017	1.30838881491345
DEH1_2014	Z022E0095/LH185	79.0574	0.0141407329942482	19.1982	5.08021102508782	0.0598123	129.547875173075	192.5958	0.0154713930989521	60.7773	1.0011821087188	63.0162	0.672673353231068	NA	NA	11.9396	0.661408189081225
DEH1_2014	Z022E0095/LH195	91.9399	0.0286675856823692	20.8747	8.19183773876271	0.0173926	252.343167536479	192.8161	0.0303232652165163	65	1.90375508703235	68.5	1.29173318525717	NA	NA	9.3886	1.32097203728362
DEH1_2014	Z022E0097/LH185	101.3776	0.0287075153301326	18.5217	9.18638822773987	0.0526316	258.89338587709	200.5773	0.0312546256180657	64	1.99992629289712	67.5	1.34393003401124	NA	NA	10.4166	1.32323568575233
DEH1_2014	Z022E0097/LH195	101.6298	0.0287189238009222	20.8159	9.15815241933141	0.0180195	252.343167536479	216.4886	0.0312463099001948	69	1.90375508703235	70	1.29173318525717	NA	NA	10.8054	1.32256990679095
DEH1_2014	Z022E0108/LH185	81.2053	0.0303940675951894	17.2929	9.58189268077062	0.0268568	258.89338587709	183.2555	0.0351788128813796	64	1.99992629289712	65	1.34393003401124	NA	NA	11.1604	1.32323568575233
DEH1_2014	Z022E0108/LH195	98.7366	0.0303047012406712	19.9411	8.63406331362041	0.0277778	252.343167536479	209.8121	0.0342407999055334	67	1.90375508703235	67.5	1.29173318525717	NA	NA	10.4514	1.32203728362184
DEH1_2014	Z022E0110/LH185	89.4363	0.0294034320482959	18.6403	9.26987684109151	0.03	258.89338587709	179.8041	0.0324595731375702	63	1.99992629289712	65	1.34393003401124	NA	NA	13.4468	1.31890812250333
DEH1_2014	Z022E0110/LH195	100.963	0.0303085040642677	20.3886	9.8126543955333	0.0974946	252.343167536479	210.3017	0.0357276502608641	67	1.90375508703235	67.5	1.29173318525717	NA	NA	11.0177	1.31824234354194
DEH1_2014	Z022E0114/LH185	88.8388	0.0287797689784665	18.2145	9.56523558516275	0.1018519	258.89338587709	184.2687	0.0314051401115304	64	1.99992629289712	65	1.34393003401124	NA	NA	10.5725	1.32310252996005
DEH1_2014	Z022E0121/LH185	103.2082	0.0305043494794885	18.0092	9.99913261221652	0.0905901	258.89338587709	187.3891	0.0355488623266381	63	1.99992629289712	65	1.34393003401124	NA	NA	10.1993	1.32336884154461
DEH1_2014	Z022E0121/LH195	108.1795	0.0289166706279412	20.2846	9.20913938271648	0.1636501	252.343167536479	203.7303	0.0309727227822396	64	1.90375508703235	67	1.29173318525717	NA	NA	10.8928	1.31498002663116
DEH1_2014	Z022E0123/LH185	91.9152	0.0302495602985217	20.554	11.482426662566	0.0686217	258.89338587709	175.7449	0.0374016042682917	64	1.99992629289712	65	1.34393003401124	NA	NA	11.2741	1.31977363515313
DEH1_2014	Z022E0130/LH185	80.3231	0.0300898417074678	18.6843	10.0007576947148	0.0821429	258.89338587709	184.8095	0.0349135414812955	63	1.99992629289712	64	1.34393003401124	NA	NA	9.6339	1.30805592543276
DEH1_2014	Z022E0142/LH185	92.8624	0.0299833626467652	19.4687	9.03850572039196	0.0734355	258.89338587709	188.0096	0.0335065220175262	62	1.99992629289712	65	1.34393003401124	NA	NA	11.2695	1.32336884154461
DEH1_2014	Z022E0149/LH185	99.4641	0.0286961068593431	19.2273	10.761499439245	0.0576923	258.89338587709	199.4774	0.0330275366681579	63	1.99992629289712	64	1.34393003401124	NA	NA	10.4647	1.32130492676431
DEH1_2014	Z022E0155/LH195	95.5643	0.0288653325093882	22.8163	9.22437453113831	0.0540936	252.343167536479	193.1826	0.0317244636777759	67.5	1.90375508703235	69	1.29173318525717	NA	NA	11.5021	1.32256990679095
DEH1_2014	Z022E0160/LH185	79.2411	0.0137750401673242	19.6035	5.04242785700168	0.0227753	129.547875173075	183.6321	0.014738778354519	62.7773	1.0011821087188	65.0162	0.672673353231068	NA	NA	9.4457	0.661551331557923
DEH1_2014	Z022E0166/LH185	97.1719	0.0286942054475448	18.5953	10.7606868979958	0.0089286	258.89338587709	192.363	0.0330200525220741	64	1.99992629289712	66	1.34393003401124	NA	NA	11.7458	1.31890812250333
DEH1_2015	(LAMA2002-35-2-B-B-B-B/CG44)-1-3-B-1-1-B24-B5-B16/LH195	118.6955	0.010033361225477	23.5059	3.67144031187675	0	1148.76507754164	231.3466	0.016189781475304	68.889	10.0379296510465	72.3127	1.19397328362846	NA	NA	13.9867	1.36800879483304
DEH1_2015	2369/PHZ51	132.3308	0.010026071430617	20.5623	3.67125483876173	0.0084746	1148.76507754164	272.7214	0.0161788690908389	63.1988	8.38601542863591	64.3659	1.19297918608263	NA	NA	12.3311	1.36800879483304
DEH1_2015	A634/LH82	90.3878	0.00502017659007349	15.9982	1.83579174856078	0.0714286	574.382423894314	200.359	0.00810040820712041	57.2526	5.47488100448045	59.3299	0.597469897483691	NA	NA	8.3269	0.684049883193624
DEH1_2015	A634/PHZ51	125.0613	0.00499764279276207	16.5974	1.8351932268186	0	574.382423894314	245.3761	0.00806593514518088	60.3112	3.81409988955253	64.0014	0.594368375271824	NA	NA	11.7693	0.683966675827951
DEH1_2015	B104/LH82	121.2062	0.00502664732441097	18.2135	1.83598315681548	0	574.382423894314	230.8399	0.00811030322158772	61.5239	5.47512393304257	62.8478	0.598350978564772	NA	NA	10.1502	0.683966675827951
DEH1_2015	B104/PHZ51	126.2062	0.00502664732441097	18.4135	1.83598315681548	0.0508475	574.382423894314	271.8399	0.00811030322158772	63.0723	5.24822865602324	63.8478	0.598350978564772	NA	NA	10.7492	0.683966675827951
DEH1_2015	B106/LH82	119.0613	0.00499764279276207	18.7974	1.8351932268186	0.0338983	574.382423894314	240.3761	0.00806593514518088	59.9957	4.37052776108656	61.0014	0.594368375271824	NA	NA	12.8215	0.683966675827951
DEH1_2015	B106/PHZ51	148.3045	0.00500573498575626	20.7985	1.83539687629889	0	574.382423894314	285.7452	0.00807827789142513	61.5276	4.41231147377106	63.4683	0.595488164026095	NA	NA	11.3806	0.683966675827951
DEH1_2015	B111/LH82	74.136	0.00501322472927524	17.7961	1.83559625989754	7.8115799e-09	574.382423894314	202.6209	0.0080897619169534	58.6756	5.12664291068258	60.3861	0.596518608263436	NA	NA	10.9803	0.684049883193624
DEH1_2015	B111/PHZ51	129.3045	0.00500573498575626	18.9985	1.83539687629889	0	574.382423894314	262.7452	0.00807827789142513	64.1668	3.22354055504075	66.4683	0.595488164026095	NA	NA	12.4427	0.683966675827951
DEH1_2015	B118/B47	108.255	0.00502017659007349	18.7158	1.83579174856078	0	574.382423894314	233.0724	0.00810037463055283	60.3858	5.46261311209343	62.2393	0.597469897483691	NA	NA	12.4838	0.683966675827951
DEH1_2015	B14A/C103	133.7396	0.0100245093317185	19.0742	3.67125483876173	0.0174031	1148.76507754164	277.8541	0.01617635084827	63.416	8.32795550228942	69.5419	1.19273066169618	NA	NA	8.8842	1.36800879483304
DEH1_2015	B14A/H95	120.3765	0.00502664732441097	18.2348	1.83598315681548	0.0508475	574.382423894314	246.7001	0.00811033427991273	62.7094	5.19356972954642	67.7444	0.598350978564772	NA	NA	9.4245	0.684049883193624
DEH1_2015	B14A/OH43	129.0776	0.0100109711412642	18.853	3.67069841941666	0.0438597	1148.76507754164	263.3572	0.0161553654935294	62.6073	7.87355762684545	65.399	1.19086672879776	NA	NA	10.8224	1.36800879483304
DEH1_2015	B37/C103	134.4315	0.0100177402364914	20.3484	3.67106936564671	0.0254237	1148.76507754164	266.9785	0.0161662778779945	62.9378	8.4605944972065	67.4984	1.19186082634359	NA	NA	10.1772	1.36800879483304
DEH1_2015	B37/H95	161.6365	0.00999274665411433	20.8939	3.67032747318662	0.0171053	1148.76507754164	266.0591	0.0161276648252717	62.7264	6.4464737886762	67.2875	1.1883193538366	NA	NA	11.3932	1.36800879483304
DEH1_2015	B37/OH43	131.3765	0.00502664732441097	21.8348	1.83598315681548	0.0178571	574.382423894314	254.7001	0.00811033427991273	61.0012	4.35012176186855	66.7444	0.598350978564772	NA	NA	10.385	0.684049883193624
DEH1_2015	B47/LH162	95.792	0.00501322472927524	18.0098	1.83559625989754	0.0181818	574.382423894314	221.1121	0.00808972666155743	59.332	4.37878733219861	60.9894	0.596518608263436	NA	NA	9.9604	0.683966675827951
DEH1_2015	B47/LH195	135.297	0.0100468994159312	18.8558	3.6718112581068	0.0276158	1148.76507754164	246.5995	0.0162107668300446	65.4662	9.06487929547802	66.5889	1.19583721652687	NA	NA	11.2282	1.36800879483304
DEH1_2015	B47/PB80	117.3045	0.00500573498575626	18.8985	1.83539687629889	0.0392157	574.382423894314	238.7452	0.00807827789142513	61.8219	5.16551148062165	62.4683	0.595488164026095	NA	NA	10.1215	0.683966675827951
DEH1_2015	B47/PHZ51	109.6007	0.0150076048181378	17.6333	5.50595489256748	0.0059524	1723.14761631246	250.6175	0.0242070264004157	60.9608	11.4948937023564	62.8121	1.78527493010252	737.1088	0.0069960754958664	12.188	2.04596674453758
DEH1_2015	B73/MO17	135.264	0.0100323198262113	19.9138	3.67144031187675	0.0092593	1148.76507754164	260.918	0.0161889420611144	63.1891	7.62261242217632	64.8388	1.19384902143523	NA	NA	13.9597	1.36800879483304
DEH1_2015	B73/PHG35	137.8064	0.0100323198262113	19.4111	3.67144031187675	0.0090909	1148.76507754164	248.6051	0.0161889420611144	61.6806	9.33926710639166	63.1702	1.19384902143523	NA	NA	13.2811	1.36800879483304
DEH1_2015	B73/PHM49	142.2546	0.0100031606467714	20.2112	3.67051294630164	9.3696548e-10	1148.76507754164	255.1893	0.0161444531090642	62.5818	7.42462564404917	63.916	1.18987263125194	NA	NA	14.5671	1.36800879483304
DEH1_2015	B73/PHN82	129.8276	0.0100021192475057	19.605	3.67051294630164	8.5756717e-10	1148.76507754164	239.3112	0.016142774280685	62.0199	9.38760989025338	64.4737	1.1896862379621	NA	NA	13.7343	1.36800879483304
DEH1_2015	B73/PHZ51	147.504	0.0100468994159312	18.5564	3.6718112581068	0	1148.76507754164	282.2104	0.0162107668300446	63.007	9.0456879390706	64.4216	1.19583721652687	NA	NA	14.4738	1.36800879483304
DEH1_2015	B73/TX205	154.1438	0.0100187816357571	21.2945	3.67106936564671	1.1803079e-09	1148.76507754164	282.3784	0.0161679567063738	64.5438	7.88546112638929	66.1597	1.19198508853681	NA	NA	12.6588	1.36800879483304
DEH1_2015	B73_NC230-059-1-1-1-1/LH185	136.7798	0.00502664732441097	22.9564	1.83598315681548	0.0434783	574.382423894314	247.3749	0.00811033427991273	63.2262	5.46297750493661	64.6348	0.598350978564772	NA	NA	10.947	0.684049883193624
DEH1_2015	B73_NC230-129-1-1-1-1/LH185	132.4066	0.00500573498575626	24.5088	1.83539687629889	0.0181818	574.382423894314	238.3704	0.00807831566506366	61.1171	2.60346540023149	62.4926	0.595488164026095	NA	NA	11.8673	0.684049883193624
DEH1_2015	B73_PHG39-1/LH82	110.5534	0.00501322472927524	18.9007	1.83559625989754	9.7180376e-09	574.382423894314	222.4445	0.0080897619169534	61.7439	5.47475954019939	62.0613	0.596518608263436	NA	NA	9.7422	0.684049883193624
DEH1_2015	B73_PHG39-10/LH82	105.4066	0.00500573498575626	19.0088	1.83539687629889	4.4516357e-09	574.382423894314	216.3704	0.00807831566506366	60.8487	2.06112738530037	62.4926	0.595488164026095	NA	NA	11.1954	0.684049883193624
DEH1_2015	B73_PHG39-11/PHZ51	137.5636	0.00499764279276207	19.9903	1.8351932268186	0.0166667	574.382423894314	260.2236	0.00806597627647617	64.4236	5.27033515517609	64.7109	0.594368375271824	NA	NA	13.5644	0.684049883193624
DEH1_2015	B73_PHG39-12/LH82	89.5636	0.00499764279276207	18.9903	1.8351932268186	0.0185185	574.382423894314	205.2236	0.00806597627647617	59.493	2.81250542793506	60.7109	0.594368375271824	NA	NA	11.5054	0.684049883193624
DEH1_2015	B73_PHG39-13/LH82	95.3878	0.00502017659007349	19.7982	1.83579174856078	0.0175439	574.382423894314	240.359	0.00810040820712041	60.1789	5.17389251601476	62.3299	0.597469897483691	NA	NA	12.0689	0.684049883193624
DEH1_2015	B73_PHG39-14/PHZ51	146.2062	0.00502664732441097	20.1135	1.83598315681548	0	574.382423894314	273.8399	0.00811030322158772	64.9114	5.4615199335639	66.8478	0.598350978564772	NA	NA	12.5692	0.683966675827951
DEH1_2015	B73_PHG39-16/PHZ51	144.2062	0.00502664732441097	17.7135	1.83598315681548	0	574.382423894314	278.8399	0.00811030322158772	64.5513	5.47512393304257	66.8478	0.598350978564772	NA	NA	10.9861	0.683966675827951
DEH1_2015	B73_PHG39-17/LH82	148.3765	0.00502664732441097	19.4348	1.83598315681548	0	574.382423894314	244.7001	0.00811033427991273	59.4345	4.3394329051353	60.7444	0.598350978564772	NA	NA	10.1739	0.684049883193624
DEH1_2015	B73_PHG39-19/PHZ51	119.5917	0.00501322472927524	19.8158	1.83559625989754	0	574.382423894314	254.4908	0.00808972666155743	63.123	4.07573395095491	64.087	0.596518608263436	NA	NA	14.0619	0.683966675827951
DEH1_2015	B73_PHG39-2/PHZ51	127.8116	0.00501322472927524	18.7014	1.83559625989754	3.1391535e-09	574.382423894314	260.0473	0.00808972666155743	62.8036	5.2522369772982	64.1807	0.596518608263436	NA	NA	13.7222	0.683966675827951
DEH1_2015	B73_PHG39-20/LH82	127.5636	0.00499764279276207	18.2903	1.8351932268186	0.0181818	574.382423894314	228.2236	0.00806597627647617	58.841	5.47475954019939	59.7109	0.594368375271824	NA	NA	10.4434	0.684049883193624
DEH1_2015	B73_PHG39-21/PHZ51	128.8632	0.00498887316954553	20.2001	1.83498512598354	4.5139828e-09	574.382423894314	273.5104	0.00805263294851789	62.1657	4.08593695056392	64.958	0.593147064305685	NA	NA	13.5372	0.684049883193624
DEH1_2015	B73_PHG39-23/PHZ51	122.3765	0.00502664732441097	19.1348	1.83598315681548	0	574.382423894314	264.7001	0.00811033427991273	61.1569	5.46273457637449	61.7444	0.598350978564772	NA	NA	12.3718	0.684049883193624
DEH1_2015	B73_PHG39-24/LH82	85.2062	0.00502664732441097	20.0135	1.83598315681548	0	574.382423894314	206.8399	0.00811030322158772	60.6394	4.39967918854086	60.8478	0.598350978564772	NA	NA	12.8374	0.683966675827951
DEH1_2015	B73_PHG39-25/PHZ51	132.8116	0.00501322472927524	19.1014	1.83559625989754	3.1391586e-09	574.382423894314	251.0473	0.00808972666155743	63.4253	2.98777838550406	64.1807	0.596518608263436	NA	NA	12.7669	0.683966675827951
DEH1_2015	B73_PHG39-3/PHZ51	140.7798	0.00502664732441097	19.3564	1.83598315681548	4.1486397e-09	574.382423894314	265.3749	0.00811033427991273	62.2727	5.46297750493661	64.6348	0.598350978564772	NA	NA	12.569	0.684049883193624
DEH1_2015	B73_PHG39-4/LH82	78.3878	0.00502017659007349	20.3982	1.83579174856078	0.0545455	574.382423894314	189.359	0.00810040820712041	60.3623	5.17389251601476	63.3299	0.597469897483691	NA	NA	7.1726	0.684049883193624
DEH1_2015	B73_PHG39-5/PHZ51	141.1351	0.00500573498575626	19.7696	1.83539687629889	6.8485121e-09	574.382423894314	276.3137	0.00807831566506366	62.8279	2.95619767242857	66.0862	0.595488164026095	NA	NA	12.8994	0.684049883193624
DEH1_2015	B73_PHG39-6/PHZ51	137.1351	0.00500573498575626	19.7696	1.83539687629889	6.8485121e-09	574.382423894314	271.3137	0.00807831566506366	61.7167	4.39129815314775	66.0862	0.595488164026095	NA	NA	11.6055	0.684049883193624
DEH1_2015	B73_PHG39-7/LH82	79.792	0.00501322472927524	18.9098	1.83559625989754	0.0181818	574.382423894314	202.1121	0.00808972666155743	59.6956	3.95754920548392	59.9894	0.596518608263436	NA	NA	12.7627	0.683966675827951
DEH1_2015	B73_PHG39-8/PHZ51	126.1516	0.00500573498575626	18.6928	1.83539687629889	0.0181818	574.382423894314	259.136	0.00807827789142513	62.7549	4.25938794391703	64.9332	0.595488164026095	NA	NA	11.648	0.683966675827951
DEH1_2015	B79/LH82	104.255	0.00502017659007349	18.0158	1.83579174856078	0.1	574.382423894314	185.0724	0.00810037463055283	61.6109	4.40113675991358	62.2393	0.597469897483691	NA	NA	5.8624	0.683966675827951
DEH1_2015	B79/PHZ51	133.8017	0.00502017659007349	18.2994	1.83579174856078	0	574.382423894314	246.5809	0.00810040820712041	61.1391	5.47524539732363	61.9954	0.597469897483691	NA	NA	12.9815	0.684049883193624
DEH1_2015	B97/B47	107.3639	0.0100265921302499	18.5559	3.67125483876173	0	1148.76507754164	240.0558	0.0161797085050285	60.1763	9.79888794592119	61.7366	1.19304131717925	NA	NA	11.9638	1.36800879483304
DEH1_2015	B97/LH195	116.3878	0.00502017659007349	20.1982	1.83579174856078	0.0185185	574.382423894314	251.359	0.00810040820712041	61.1202	5.27373615504575	64.3299	0.597469897483691	NA	NA	12.9564	0.684049883193624
DEH1_2015	BSSSC0_002/LH82	101.3045	0.00500573498575626	17.3985	1.83539687629889	0.1041667	574.382423894314	207.7452	0.00807827789142513	60.0054	3.61805653992233	62.4683	0.595488164026095	NA	NA	9.3042	0.683966675827951
DEH1_2015	BSSSC0_002/PHZ51	155.5917	0.00501322472927524	17.7158	1.83559625989754	0.5636364	574.382423894314	279.4908	0.00808972666155743	64.1224	5.47573125444787	68.087	0.596518608263436	NA	NA	9.436	0.683966675827951
DEH1_2015	BSSSC0_008/LH82	118.1516	0.00500573498575626	18.7928	1.83539687629889	0.2678571	574.382423894314	203.136	0.00807827789142513	59.8127	3.15236248633982	63.9332	0.595488164026095	NA	NA	6.1251	0.683966675827951
DEH1_2015	BSSSC0_008/PHZ51	138.8632	0.00498887316954553	18.2001	1.83498512598354	0.0172414	574.382423894314	275.5104	0.00805263294851789	61.004	5.47488100448045	63.958	0.593147064305685	NA	NA	12.7944	0.684049883193624
DEH1_2015	BSSSC0_023/LH82	103.7196	0.00497933603507016	18.2871	1.83477275926684	0	574.382423894314	201.6738	0.00803811108303737	56.0264	3.00879170612737	58.5136	0.591809816713265	NA	NA	6.6736	0.683966675827951
DEH1_2015	BSSSC0_023/PHZ51	133.7196	0.00497933603507016	18.7871	1.83477275926684	0.0701754	574.382423894314	263.6738	0.00803811108303737	60.9929	3.75336774902273	67.5136	0.591809816713265	NA	NA	7.9591	0.683966675827951
DEH1_2015	BSSSC0_028/LH82	103.255	0.00502017659007349	17.9158	1.83579174856078	0.02	574.382423894314	229.0724	0.00810037463055283	60.2474	4.1578438049512	63.2393	0.597469897483691	NA	NA	8.3835	0.683966675827951
DEH1_2015	BSSSC0_028/PHZ51	101.8632	0.00498887316954553	17.7001	1.83498512598354	4.5142814e-09	574.382423894314	267.5104	0.00805263294851789	62.3059	4.3697989754002	63.958	0.593147064305685	NA	NA	10.2954	0.684049883193624
DEH1_2015	BSSSC0_029/PHZ51	131.3878	0.00502017659007349	19.0982	1.83579174856078	6.2718654e-09	574.382423894314	285.359	0.00810040820712041	62.6411	4.15590037645425	65.3299	0.597469897483691	NA	NA	12.991	0.684049883193624
DEH1_2015	BSSSC0_032/LH82	109.7196	0.00497933603507016	17.6871	1.83477275926684	0.0416667	574.382423894314	215.6738	0.00803811108303737	59.177	2.74096296639095	61.5136	0.591809816713265	NA	NA	7.5895	0.683966675827951
DEH1_2015	BSSSC0_032/PHZ51	118.3765	0.00502664732441097	18.9348	1.83598315681548	0	574.382423894314	256.7001	0.00811033427991273	61.7375	4.89901884797688	64.7444	0.598350978564772	NA	NA	10.2899	0.684049883193624
DEH1_2015	BSSSC0_038/LH82	90.5917	0.00501322472927524	20.2158	1.83559625989754	0.0181818	574.382423894314	197.4908	0.00808972666155743	60.3217	4.40089383135146	62.087	0.596518608263436	NA	NA	6.9601	0.683966675827951
DEH1_2015	BSSSC0_038/PHZ51	116.2062	0.00502664732441097	18.3135	1.83598315681548	0.0892857	574.382423894314	248.8399	0.00811030322158772	61.5747	5.20523030052814	61.8478	0.598350978564772	NA	NA	10.2723	0.683966675827951
DEH1_2015	BSSSC0_044/LH82	106.1026	0.00499764279276207	17.1136	1.8351932268186	0.0526316	574.382423894314	210.0081	0.00806593514518088	61.5858	3.76296342722644	63.3394	0.594368375271824	NA	NA	8.1572	0.683966675827951
DEH1_2015	BSSSC0_044/PHZ51	129.8632	0.00498887316954553	19.0001	1.83498512598354	4.5143329e-09	574.382423894314	273.5104	0.00805263294851789	62.1324	4.3697989754002	65.958	0.593147064305685	NA	NA	12.7879	0.684049883193624
DEH1_2015	CG102/LH82	67.0613	0.00499764279276207	18.4974	1.8351932268186	0	574.382423894314	195.3761	0.00806593514518088	55.007	3.08215613188737	57.0014	0.594368375271824	NA	NA	8.8031	0.683966675827951
DEH1_2015	CG102/PHZ51	115.8017	0.00502017659007349	17.7994	1.83579174856078	0	574.382423894314	245.5809	0.00810040820712041	59.6848	2.39588294390063	61.9954	0.597469897483691	NA	NA	11.7082	0.684049883193624
DEH1_2015	CG108/CG102	115.3555	0.0100114918408971	16.4036	3.67088389253168	0.0169492	1148.76507754164	221.0578	0.016156204907719	55.733	9.60187288204251	54.9805	1.19099099099099	NA	NA	10.0196	1.36800879483304
DEH1_2015	CG119/CG108	101.136	0.00501322472927524	15.5961	1.83559625989754	0.0178572	574.382423894314	201.6209	0.0080897619169534	53.6508	5.39702240032125	54.3861	0.596518608263436	NA	NA	8.9414	0.684049883193624
DEH1_2015	CG119/PHZ51	105.8017	0.00502017659007349	17.4994	1.83579174856078	0	574.382423894314	215.5809	0.00810040820712041	59.248	4.06176555863305	61.9954	0.597469897483691	NA	NA	9.193	0.684049883193624
DEH1_2015	CG121/LH82	111.1026	0.00499764279276207	16.9136	1.8351932268186	0.0526316	574.382423894314	207.0081	0.00806593514518088	56.977	5.009308415179	58.3394	0.594368375271824	NA	NA	9.0507	0.683966675827951
DEH1_2015	CG121/PHZ51	126.8632	0.00498887316954553	16.6001	1.83498512598354	0.0172414	574.382423894314	251.5104	0.00805263294851789	59.8403	5.40090925731516	60.958	0.593147064305685	NA	NA	10.7605	0.684049883193624
DEH1_2015	CG60/LH162	92.0531	0.010026071430617	16.699	3.67125483876173	0.2053571	1148.76507754164	204.1631	0.0161788690908389	54.8532	6.5932026401962	54.7319	1.19297918608263	NA	NA	8.4229	1.36800879483304
DEH1_2015	CGR01/LH198	144.828	0.0100109711412642	18.7572	3.67069841941666	3.5701877e-09	1148.76507754164	250.7263	0.0161553654935294	61.4242	10.6674790197784	62.2003	1.19086672879776	NA	NA	12.8374	1.36800879483304
DEH1_2015	CH753-4/LH82	85.255	0.00502017659007349	18.3158	1.83579174856078	0.0344827	574.382423894314	183.0724	0.00810037463055283	58.5744	5.24944329883383	58.2393	0.597469897483691	NA	NA	8.2124	0.683966675827951
DEH1_2015	CH753-4/PHZ51	103.0613	0.00499764279276207	16.9974	1.8351932268186	0	574.382423894314	230.3761	0.00806593514518088	59.8859	4.37052776108656	63.0014	0.594368375271824	NA	NA	9.1515	0.683966675827951
DEH1_2015	CML103/LH195	162.1026	0.00499764279276207	23.2136	1.8351932268186	0	574.382423894314	251.0081	0.00806593514518088	70.1535	3.63153907511995	70.3394	0.594368375271824	NA	NA	13.9711	0.683966675827951
DEH1_2015	CML103/LH82	135.7798	0.00502664732441097	20.0564	1.83598315681548	0.0925926	574.382423894314	233.3749	0.00811033427991273	61.3821	5.12846487489847	61.6348	0.598350978564772	NA	NA	12.5405	0.684049883193624
DEH1_2015	CML228/B47	152.1026	0.00499764279276207	22.8136	1.8351932268186	0	574.382423894314	252.0081	0.00806593514518088	67.104	4.14921984099597	67.3394	0.594368375271824	NA	NA	15.3895	0.683966675827951
DEH1_2015	CML228/PHZ51	149.1026	0.00499764279276207	22.7136	1.8351932268186	0.0175439	574.382423894314	276.0081	0.00806593514518088	67.1085	4.1933113750206	69.3394	0.594368375271824	NA	NA	15.9376	0.683966675827951
DEH1_2015	CML247/LH195	148.3045	0.00500573498575626	26.9985	1.83539687629889	0	574.382423894314	265.7452	0.00807827789142513	69.2928	5.34867961645953	72.4683	0.595488164026095	NA	NA	14.5296	0.683966675827951
DEH1_2015	CML247/LH82	135.8116	0.00501322472927524	23.2014	1.83559625989754	3.1392167e-09	574.382423894314	241.0473	0.00808972666155743	64.0321	4.36384722562828	66.1807	0.596518608263436	NA	NA	14.2189	0.683966675827951
DEH1_2015	DE811/LH82	91.1351	0.00500573498575626	19.5696	1.83539687629889	6.8489065e-09	574.382423894314	211.3137	0.00807831566506366	59.3448	4.01828134601372	61.0862	0.595488164026095	NA	NA	10.1374	0.684049883193624
DEH1_2015	DE811/PHZ51	137.3765	0.00502664732441097	18.7348	1.83598315681548	0	574.382423894314	277.7001	0.00811033427991273	64.5446	4.4013796884757	66.7444	0.598350978564772	NA	NA	9.2957	0.684049883193624
DEH1_2015	DKFBHJ/LH82	80.8632	0.00498887316954553	20.7001	1.83498512598354	0.0172414	574.382423894314	205.5104	0.00805263294851789	57.8573	3.97030295499518	59.958	0.593147064305685	NA	NA	9.5032	0.684049883193624
DEH1_2015	DKFBHJ/PHZ51	105.4066	0.00500573498575626	18.5088	1.83539687629889	4.4520052e-09	574.382423894314	264.3704	0.00807831566506366	61.0847	4.02010331022961	61.4926	0.595488164026095	NA	NA	11.1219	0.684049883193624
DEH1_2015	F42/MO17	119.2859	0.0100401303207041	20.6831	3.67162578499178	0.0084746	1148.76507754164	253.2435	0.0161998544455795	62.9581	10.4594107063233	66.8121	1.19484311898105	NA	NA	15.6629	1.36800879483304
DEH1_2015	F42/OH43	116.548	0.0100057641449357	21.7609	3.67069841941666	0.0350877	1148.76507754164	242.1869	0.0161486501800124	60.5713	9.26845343053391	66.629	1.19018328673501	NA	NA	10.772	1.36800879483304
DEH1_2015	GEMN-0138/B47	140.4066	0.00500573498575626	19.2088	1.83539687629889	4.4520052e-09	574.382423894314	253.3704	0.00807831566506366	60.9536	3.63809814629717	61.4926	0.595488164026095	NA	NA	11.2231	0.684049883193624
DEH1_2015	GEMN-0144/B47	137.3878	0.00502017659007349	20.6982	1.83579174856078	6.2719414e-09	574.382423894314	258.359	0.00810040820712041	60.5476	5.47488100448045	61.3299	0.597469897483691	NA	NA	14.591	0.684049883193624
DEH1_2015	GEMN-0155/B47	84.8017	0.00502017659007349	19.4994	1.83579174856078	0.0185185	574.382423894314	228.5809	0.00810040820712041	60.5924	4.03334291686511	64.9954	0.597469897483691	NA	NA	12.2639	0.684049883193624
DEH1_2015	GEMN-0156/B47	116.4066	0.00500573498575626	20.9088	1.83539687629889	4.4520052e-09	574.382423894314	234.3704	0.00807831566506366	60.6527	4.14375394834829	61.4926	0.595488164026095	NA	NA	12.9939	0.684049883193624
DEH1_2015	GEMS-0113/PHZ51	137.8632	0.00498887316954553	18.7001	1.83498512598354	4.5143578e-09	574.382423894314	270.5104	0.00805263294851789	62.7478	4.88942316977318	64.958	0.593147064305685	NA	NA	11.7298	0.684049883193624
DEH1_2015	GEMS-0142/PHZ51	118.5917	0.00501322472927524	19.5158	1.83559625989754	0	574.382423894314	249.4908	0.00808972666155743	63.2217	3.97431127627014	64.087	0.596518608263436	NA	NA	13.0827	0.683966675827951
DEH1_2015	GEMS-0146/LH82	93.2062	0.00502664732441097	19.8135	1.83598315681548	0.0517241	574.382423894314	234.8399	0.00811030322158772	61.5363	4.14423980547252	61.8478	0.598350978564772	NA	NA	10.3427	0.683966675827951
DEH1_2015	GEMS-0146/PHZ51	125.0613	0.00499764279276207	18.9974	1.8351932268186	0	574.382423894314	272.3761	0.00806593514518088	63.8179	3.89220142227385	64.0014	0.594368375271824	NA	NA	15.9315	0.683966675827951
DEH1_2015	GEMS-0147/PHZ51	144.2062	0.00502664732441097	19.0135	1.83598315681548	0	574.382423894314	282.8399	0.00811030322158772	64.2917	5.23863297781953	64.8478	0.598350978564772	NA	NA	12.3636	0.683966675827951
DEH1_2015	GEMS-0148/LH82	116.3878	0.00502017659007349	19.7982	1.83579174856078	6.271953e-09	574.382423894314	206.359	0.00810040820712041	61.3646	3.10268359538645	63.3299	0.597469897483691	NA	NA	7.6275	0.684049883193624
DEH1_2015	GEMS-0148/PHZ51	145.2062	0.00502664732441097	19.6135	1.83598315681548	0	574.382423894314	259.8399	0.00811030322158772	63.7477	3.66360564531968	63.8478	0.598350978564772	NA	NA	10.5865	0.683966675827951
DEH1_2015	GEMS-0150/LH82	116.8116	0.00501322472927524	19.3014	1.83559625989754	0.05	574.382423894314	231.0473	0.00808972666155743	61.8028	5.14619865993317	63.1807	0.596518608263436	NA	NA	9.2949	0.683966675827951
DEH1_2015	GEMS-0150/PHZ51	156.6876	0.0100109711412642	19.2959	3.67069841941666	0.0181818	1148.76507754164	280.1354	0.0161553654935294	64.2469	7.83809005677605	65.9458	1.19086672879776	NA	NA	12.8242	1.36800879483304
DEH1_2015	GEMS-0162/LH82	115.4066	0.00500573498575626	20.2088	1.83539687629889	4.4520278e-09	574.382423894314	239.3704	0.00807831566506366	62.4802	3.13924434398539	64.4926	0.595488164026095	NA	NA	13.1181	0.684049883193624
DEH1_2015	GEMS-0162/PHZ51	146.8632	0.00498887316954553	20.1001	1.83498512598354	4.514382e-09	574.382423894314	296.5104	0.00805263294851789	63.6616	5.29146994008045	64.958	0.593147064305685	NA	NA	13.9195	0.684049883193624
DEH1_2015	GEMS-0163/LH82	125.1351	0.00500573498575626	18.7696	1.83539687629889	6.8489312e-09	574.382423894314	236.3137	0.00807831566506366	62.2596	3.73526957114485	64.0862	0.595488164026095	NA	NA	11.0577	0.684049883193624
DEH1_2015	GEMS-0163/PHZ51	151.5997	0.010033361225477	19.6498	3.67144031187675	4.7057977e-09	1148.76507754164	297.2031	0.016189781475304	65.3879	8.27487561146637	67.2553	1.19397328362846	NA	NA	13.8753	1.36800879483304
DEH1_2015	GEMS-0182/LH82	131.1516	0.00500573498575626	19.1928	1.83539687629889	0	574.382423894314	220.136	0.00807827789142513	59.6754	4.40393043837795	60.9332	0.595488164026095	NA	NA	10.0162	0.683966675827951
DEH1_2015	GEMS-0182/PHZ51	154.5636	0.00499764279276207	20.2903	1.8351932268186	1.3039453e-08	574.382423894314	262.2236	0.00806597627647617	63.3646	3.8099701039965	65.7109	0.594368375271824	NA	NA	13.0901	0.684049883193624
DEH1_2015	LAMA2002-12-1-B-B-B-B-B-B-1-B28-B14/LH195	142.3045	0.00500573498575626	25.1985	1.83539687629889	0	574.382423894314	251.7452	0.00807827789142513	68.3509	5.47305904026456	71.4683	0.595488164026095	NA	NA	12.8076	0.683966675827951
DEH1_2015	LAMA2002-58-3-B-B-B-B-B-B-1-B19-B18-B22/LH195	146.0347	0.0100156574379599	25.0568	3.67088389253168	1.7357335e-11	1148.76507754164	260.6751	0.016162920221236	68.9005	10.9364009380443	69.4029	1.1914880397639	NA	NA	13.9887	1.36800879483304
DEH1_2015	LH132/LH51	127.7697	0.010026071430617	20.1455	3.67125483876173	4.1030107e-10	1148.76507754164	249.2475	0.0161788690908389	63.3198	9.72685962725284	64.6316	1.19297918608263	NA	NA	13.2805	1.36800879483304
DEH1_2015	LH132/LH82	112.8017	0.00502017659007349	19.2994	1.83579174856078	0.0344828	574.382423894314	231.5809	0.00810040820712041	60.616	5.19757805082138	61.9954	0.597469897483691	NA	NA	10.6282	0.684049883193624
DEH1_2015	LH145/PHZ51	127.1516	0.00500573498575626	17.7928	1.83539687629889	0.0333333	574.382423894314	269.136	0.00807827789142513	59.898	4.39275572452047	60.9332	0.595488164026095	NA	NA	10.7133	0.683966675827951
DEH1_2015	LH149/LH82	117.5917	0.00501322472927524	19.3158	1.83559625989754	0.0357143	574.382423894314	205.4908	0.00808972666155743	60.5999	4.44656440102987	61.087	0.596518608263436	NA	NA	8.1262	0.683966675827951
DEH1_2015	LH149/PHZ51	135.5917	0.00501322472927524	18.2158	1.83559625989754	0	574.382423894314	261.4908	0.00808972666155743	61.0546	5.25272283442244	63.087	0.596518608263436	NA	NA	12.8572	0.683966675827951
DEH1_2015	LH195/LH185	101.792	0.00501322472927524	20.2098	1.83559625989754	0	574.382423894314	224.1121	0.00808972666155743	62.8593	5.24822865602324	63.9894	0.596518608263436	NA	NA	15.11	0.683966675827951
DEH1_2015	LH195/PHZ51	128.2697	0.0200261078795913	19.4092	7.34176778506337	0.0136364	2297.53015508329	259.2682	0.0322914244606974	65.5908	15.9357492821765	68.2655	2.38260329294812	712.215	0.0125541570085401	11.5975	2.72364985570977
DEH1_2015	LH195/TX777	124.5987	0.0100109711412642	19.3967	3.67069841941666	0.0090909	1148.76507754164	265.9985	0.0161553654935294	64.8733	9.43801756689311	65.6937	1.19086672879776	NA	NA	12.4278	1.36800879483304
DEH1_2015	LH198/PHZ51	117.7606	0.00999951574934145	18.7432	3.67051294630164	0	1148.76507754164	251.6273	0.0161385772097369	62.7396	6.55567017734878	64.2545	1.1892513202858	NA	NA	13.1465	1.36800879483304
DEH1_2015	LH212HT/LH195	145.2198	0.0100114918408971	20.8341	3.67088389253168	5.5741057e-10	1148.76507754164	262.5295	0.016156204907719	65.5569	6.71879670681183	69.2773	1.19099099099099	NA	NA	12.9483	1.36800879483304
DEH1_2015	LH61/B47	104.7196	0.00497933603507016	17.1871	1.83477275926684	0	574.382423894314	208.6738	0.00803811108303737	58.4205	3.00964195609479	59.5136	0.591809816713265	NA	NA	10.9057	0.683966675827951
DEH1_2015	LH61/LH195	104.3045	0.00500573498575626	18.9985	1.83539687629889	0	574.382423894314	228.7452	0.00807827789142513	63.2345	3.97321809774061	64.4683	0.595488164026095	NA	NA	12.6007	0.683966675827951
DEH1_2015	LH74/PHG35	114.5917	0.00501322472927524	18.5158	1.83559625989754	0	574.382423894314	231.4908	0.00808972666155743	61.1454	3.68522628734829	62.087	0.596518608263436	NA	NA	12.3563	0.683966675827951
DEH1_2015	LH74/PHM49	115.9636	0.0100187816357571	18.3397	3.67106936564671	2.0248427e-09	1148.76507754164	222.2129	0.0161679567063738	61.0776	6.64421763824123	62.5378	1.19198508853681	NA	NA	10.7514	1.36800879483304
DEH1_2015	LH74/PHN82	90.6416	0.00997712566512869	18.9887	3.66995652695657	5.539555e-09	1148.76507754164	207.4487	0.0161041612279622	61.4883	7.29660229181235	62.1123	1.18620689655172	NA	NA	10.3786	1.36800879483304
DEH1_2015	LH74/TX205	122.9991	0.0100187816357571	19.2623	3.67106936564671	0	1148.76507754164	255.9306	0.0161679567063738	60.9438	8.49411863877895	63.7898	1.19198508853681	NA	NA	13.4286	1.36800879483304
DEH1_2015	LH82/TX777	142.5284	0.0100401303207041	21.7076	3.67162578499178	0.2152497	1148.76507754164	247.3266	0.0162006938597691	64.1584	10.2302076079638	66.1174	1.19496738117428	NA	NA	7.5833	1.36800879483304
DEH1_2015	LH82_PH207-11/B47	96.8017	0.00502017659007349	17.2994	1.83579174856078	0	574.382423894314	225.5809	0.00810040820712041	60.3239	5.47524539732363	60.9954	0.597469897483691	NA	NA	8.6249	0.684049883193624
DEH1_2015	LH82_PH207-13/B47	87.255	0.00502017659007349	19.0158	1.83579174856078	0	574.382423894314	220.0724	0.00810037463055283	60.2985	5.47281611170244	61.2393	0.597469897483691	NA	NA	11.2635	0.683966675827951
DEH1_2015	LH82_PH207-14/B47	99.7798	0.00502664732441097	18.9564	1.83598315681548	0.0175439	574.382423894314	219.3749	0.00811033427991273	58.6812	5.47512393304257	60.6348	0.598350978564772	NA	NA	10.0588	0.684049883193624
DEH1_2015	LH82_PH207-16/B47	78.2062	0.00502664732441097	18.0135	1.83598315681548	0.05	574.382423894314	197.8399	0.00811030322158772	59.7052	4.04974059480815	59.8478	0.598350978564772	NA	NA	9.7881	0.683966675827951
DEH1_2015	LH82_PH207-17/B47	99.8632	0.00498887316954553	16.1001	1.83498512598354	0.0166667	574.382423894314	229.5104	0.00805263294851789	59.2465	5.46200579068813	60.958	0.593147064305685	NA	NA	9.948	0.684049883193624
DEH1_2015	LH82_PH207-2/B47	100.8632	0.00498887316954553	18.6001	1.83498512598354	4.5144033e-09	574.382423894314	228.5104	0.00805263294851789	59.8723	5.4729375759835	60.958	0.593147064305685	NA	NA	11.3407	0.684049883193624
DEH1_2015	LH82_PH207-22/B47	58.792	0.00501322472927524	17.8098	1.83559625989754	0	574.382423894314	197.1121	0.00808972666155743	59.9473	5.47512393304257	60.9894	0.596518608263436	NA	NA	9.1466	0.683966675827951
DEH1_2015	LH82_PH207-23/B47	103.1351	0.00500573498575626	19.3696	1.83539687629889	6.8489538e-09	574.382423894314	230.3137	0.00807831566506366	58.7549	2.94684492278698	62.0862	0.595488164026095	NA	NA	8.8192	0.684049883193624
DEH1_2015	LH82_PH207-25/B47	81.7798	0.00502664732441097	17.6564	1.83598315681548	4.149081e-09	574.382423894314	196.3749	0.00811033427991273	59.5323	5.40042340019092	60.6348	0.598350978564772	NA	NA	11.4318	0.684049883193624
DEH1_2015	LH82_PH207-4/B47	120.8017	0.00502017659007349	19.1994	1.83579174856078	0	574.382423894314	234.5809	0.00810040820712041	59.9988	3.03539238367943	60.9954	0.597469897483691	NA	NA	13.1815	0.684049883193624
DEH1_2015	M0001/LH82	94.5534	0.00501322472927524	18.0007	1.83559625989754	9.7184665e-09	574.382423894314	211.4445	0.0080897619169534	62.6493	4.35534472595411	65.0613	0.596518608263436	NA	NA	9.9206	0.684049883193624
DEH1_2015	M0008/LH82	104.0613	0.00499764279276207	17.0974	1.8351932268186	0.0517241	574.382423894314	218.3761	0.00806593514518088	60.8919	4.37052776108656	62.0014	0.594368375271824	NA	NA	8.9784	0.683966675827951
DEH1_2015	M0012/PHZ51	131.7798	0.00502664732441097	19.6564	1.83598315681548	0.0169492	574.382423894314	263.3749	0.00811033427991273	63.3903	5.46297750493661	64.6348	0.598350978564772	NA	NA	11.1496	0.684049883193624
DEH1_2015	M0014/PHZ51	127.136	0.00501322472927524	18.4961	1.83559625989754	7.8120081e-09	574.382423894314	240.6209	0.0080897619169534	61.6978	4.79091563783384	63.3861	0.596518608263436	NA	NA	11.3115	0.684049883193624
DEH1_2015	M0024/PHZ51	133.3045	0.00500573498575626	17.3985	1.83539687629889	0	574.382423894314	263.7452	0.00807827789142513	64.2399	3.47132768840234	64.4683	0.595488164026095	NA	NA	11.2753	0.683966675827951
DEH1_2015	M0030/LH185	122.4066	0.00500573498575626	19.2088	1.83539687629889	4.4520558e-09	574.382423894314	230.3704	0.00807831566506366	62.8772	3.31767537286194	64.4926	0.595488164026095	NA	NA	11.6414	0.684049883193624
DEH1_2015	M0033/PHZ51	144.5636	0.00499764279276207	19.0903	1.8351932268186	1.3039483e-08	574.382423894314	275.2236	0.00806597627647617	62.8842	5.26851319096019	64.7109	0.594368375271824	NA	NA	14.4358	0.684049883193624
DEH1_2015	M0039/LH82	107.5636	0.00499764279276207	17.9903	1.8351932268186	0.0166667	574.382423894314	229.2236	0.00806597627647617	60.3891	4.16513166181478	61.7109	0.594368375271824	NA	NA	9.5145	0.684049883193624
DEH1_2015	M0041/LH82	107.0613	0.00499764279276207	19.1974	1.8351932268186	0.0727273	574.382423894314	212.3761	0.00806593514518088	60.0718	5.47208732601608	61.0014	0.594368375271824	NA	NA	10.1435	0.683966675827951
DEH1_2015	M0052/LH185	85.7798	0.00502664732441097	19.8564	1.83598315681548	4.1491007e-09	574.382423894314	228.3749	0.00811033427991273	58.237	4.27578562186007	63.6348	0.598350978564772	NA	NA	9.7762	0.684049883193624
DEH1_2015	M0052/PHZ51	127.7196	0.00497933603507016	16.7871	1.83477275926684	0	574.382423894314	243.6738	0.00803811108303737	60.5981	3.80571885415942	63.5136	0.591809816713265	NA	NA	11.2096	0.683966675827951
DEH1_2015	M0058/LH185	118.7196	0.00497933603507016	19.3871	1.83477275926684	0	574.382423894314	244.6738	0.00803811108303737	61.6434	2.7808032505785	63.5136	0.591809816713265	NA	NA	12.8514	0.683966675827951
DEH1_2015	M0077/LH82	117.8116	0.00501322472927524	18.8014	1.83559625989754	0.037037	574.382423894314	229.0473	0.00808972666155743	61.7155	5.47463807591833	63.1807	0.596518608263436	NA	NA	10.7559	0.683966675827951
DEH1_2015	M0083/PHZ51	128.8116	0.00501322472927524	17.6014	1.83559625989754	3.1392433e-09	574.382423894314	249.0473	0.00808972666155743	61.7739	5.34224200956337	62.1807	0.596518608263436	NA	NA	11.8222	0.683966675827951
DEH1_2015	M0087/LH185	108.136	0.00501322472927524	18.0961	1.83559625989754	7.8120242e-09	574.382423894314	240.6209	0.0080897619169534	62.646	4.41255440233318	64.3861	0.596518608263436	NA	NA	11.2302	0.684049883193624
DEH1_2015	M0088/PHZ51	129.5534	0.00501322472927524	18.3007	1.83559625989754	0.0169492	574.382423894314	255.4445	0.0080897619169534	62.4489	4.50984729146192	63.0613	0.596518608263436	NA	NA	10.8357	0.684049883193624
DEH1_2015	M0116/LH185	110.4066	0.00500573498575626	18.5088	1.83539687629889	4.4520717e-09	574.382423894314	246.3704	0.00807831566506366	62.0777	3.92463238531677	63.4926	0.595488164026095	NA	NA	12.3817	0.684049883193624
DEH1_2015	M0118/LH185	110.3765	0.00502664732441097	21.7348	1.83598315681548	0	574.382423894314	218.7001	0.00811033427991273	61.3016	3.63518300355174	63.7444	0.598350978564772	NA	NA	11.103	0.684049883193624
DEH1_2015	M0143/PHZ51	125.1351	0.00500573498575626	18.1696	1.83539687629889	6.8489794e-09	574.382423894314	245.3137	0.00807831566506366	61.6441	4.0300633812765	65.0862	0.595488164026095	NA	NA	9.9954	0.684049883193624
DEH1_2015	M0151/LH185	110.2062	0.00502664732441097	16.8135	1.83598315681548	0	574.382423894314	233.8399	0.00811030322158772	63.744	5.47305904026456	63.8478	0.598350978564772	NA	NA	11.5031	0.683966675827951
DEH1_2015	M0154/LH185	88.7798	0.00502664732441097	18.1564	1.83598315681548	0.0181818	574.382423894314	209.3749	0.00811033427991273	59.771	4.15614330501637	62.6348	0.598350978564772	NA	NA	10.7136	0.684049883193624
DEH1_2015	M0159/LH185	130.8017	0.00502017659007349	17.9994	1.83579174856078	0	574.382423894314	245.5809	0.00810040820712041	62.2477	4.15565744789213	65.9954	0.597469897483691	NA	NA	11.4158	0.684049883193624
DEH1_2015	M0163/PHZ51	118.3878	0.00502017659007349	18.7982	1.83579174856078	6.2720101e-09	574.382423894314	237.359	0.00810040820712041	61.3326	3.63178200368207	64.3299	0.597469897483691	NA	NA	13.9703	0.684049883193624
DEH1_2015	M0262/PHZ51	134.3878	0.00502017659007349	17.8982	1.83579174856078	6.2720101e-09	574.382423894314	254.359	0.00810040820712041	62.1322	5.22733679968099	64.3299	0.597469897483691	NA	NA	9.9939	0.684049883193624
DEH1_2015	M0266/LH185	132.8632	0.00498887316954553	18.0001	1.83498512598354	4.5144291e-09	574.382423894314	238.5104	0.00805263294851789	61.8319	5.4729375759835	63.958	0.593147064305685	NA	NA	11.6004	0.684049883193624
DEH1_2015	M0296/LH185	115.5917	0.00501322472927524	18.1158	1.83559625989754	0	574.382423894314	232.4908	0.00808972666155743	63.236	4.39202693883411	64.087	0.596518608263436	NA	NA	10.2122	0.683966675827951
DEH1_2015	M0311/LH185	115.1026	0.00499764279276207	19.9136	1.8351932268186	0	574.382423894314	236.0081	0.00806593514518088	63.3749	3.95524138414379	65.3394	0.594368375271824	NA	NA	11.9763	0.683966675827951
DEH1_2015	M0323/LH185	114.8116	0.00501322472927524	18.2014	1.83559625989754	0.0185185	574.382423894314	231.0473	0.00808972666155743	60.8456	4.78945806646112	63.1807	0.596518608263436	NA	NA	11.5374	0.683966675827951
DEH1_2015	M0341/LH185	135.3045	0.00500573498575626	18.0985	1.83539687629889	0	574.382423894314	237.7452	0.00807827789142513	61.5843	5.26268290546933	64.4683	0.595488164026095	NA	NA	10.2921	0.683966675827951
DEH1_2015	M0345/LH185	84.3878	0.00502017659007349	19.1982	1.83579174856078	6.272013e-09	574.382423894314	206.359	0.00810040820712041	64.4109	5.46066968359648	66.3299	0.597469897483691	NA	NA	8.3673	0.684049883193624
DEH1_2015	M0346/LH185	85.7798	0.00502664732441097	18.3564	1.83598315681548	4.1491098e-09	574.382423894314	210.3749	0.00811033427991273	58.7839	4.66592889262351	63.6348	0.598350978564772	NA	NA	11.9373	0.684049883193624
DEH1_2015	M0354/LH185	118.1351	0.00500573498575626	18.1696	1.83539687629889	0.0363636	574.382423894314	231.3137	0.00807831566506366	59.4101	2.54066836692367	64.0862	0.595488164026095	NA	NA	12.1069	0.684049883193624
DEH1_2015	M0357/LH185	103.4066	0.00500573498575626	19.1088	1.83539687629889	0.0172414	574.382423894314	212.3704	0.00807831566506366	62.2852	3.83960738857505	63.4926	0.595488164026095	NA	NA	10.7509	0.684049883193624
DEH1_2015	MO17/B47	123.1516	0.00500573498575626	18.2928	1.83539687629889	0.0175439	574.382423894314	242.136	0.00807827789142513	60.3624	4.14168905557027	63.9332	0.595488164026095	718.3296	0.00750817295382273	13.3009	0.683966675827951
DEH1_2015	MO17/LH195	150.8017	0.00502017659007349	20.5994	1.83579174856078	0.2033898	574.382423894314	264.5809	0.00810040820712041	66.1623	3.34111797910644	68.9954	0.597469897483691	697.4454	0.00541654534190612	15.7946	0.684049883193624
DEH1_2015	MO44_LH145_0127/B47	116.7196	0.00497933603507016	18.0871	1.83477275926684	0.0172414	574.382423894314	225.6738	0.00803811108303737	58.8521	2.69942218226857	60.5136	0.591809816713265	726.5354	0.00724604391201922	9.4194	0.683966675827951
DEH1_2015	MO44_LH145_0127/LH195	114.3878	0.00502017659007349	18.9982	1.83579174856078	6.2720179e-09	574.382423894314	224.359	0.00810040820712041	60.8689	5.39507897182429	64.3299	0.597469897483691	709.4267	0.0070291794212488	12.6663	0.684049883193624
DEH1_2015	MO44_PHW65_0025/LH185	113.136	0.00501322472927524	17.8961	1.83559625989754	7.8120319e-09	574.382423894314	239.6209	0.0080897619169534	62.4801	5.47281611170244	63.3861	0.596518608263436	700.7673	0.0103598396689067	12.7724	0.684049883193624
DEH1_2015	MO44_PHW65_0035/LH185	104.255	0.00502017659007349	20.1158	1.83579174856078	0	574.382423894314	239.0724	0.00810037463055283	61.7999	4.30493704931438	64.2393	0.597469897483691	706.0848	0.0112570236058012	10.7585	0.683966675827951
DEH1_2015	MOG_LH123HT-031-1-1-1-1-B/B47	140.5534	0.00501322472927524	21.5007	1.83559625989754	0.0526316	574.382423894314	262.4445	0.0080897619169534	61.622	3.65728950270458	62.0613	0.596518608263436	713.2683	0.00863100405556865	12.5737	0.684049883193624
DEH1_2015	MOG_LH123HT-031-1-1-1-1-B/LH195	142.5534	0.00501322472927524	23.6007	1.83559625989754	9.7185016e-09	574.382423894314	261.4445	0.0080897619169534	64.2022	5.47573125444787	70.0613	0.596518608263436	709.4529	0.00968627612592193	14.4989	0.684049883193624
DEH1_2015	MOG_LH145_0006/LH198	143.8017	0.00502017659007349	19.2994	1.83579174856078	0.0175439	574.382423894314	251.5809	0.00810040820712041	61.1634	3.97321809774061	61.9954	0.597469897483691	714.9072	0.00656572446589519	12.3904	0.684049883193624
DEH1_2015	MOG_MO45-030-1-1-1-1-B/LH185	122.7196	0.00497933603507016	20.2871	1.83477275926684	0	574.382423894314	237.6738	0.00803811108303737	60.0689	3.6827970017271	62.5136	0.591809816713265	707.9979	0.00748554067830619	13.4101	0.683966675827951
DEH1_2015	MOG_MO45-030-1-1-1-1-B/LH198	137.4066	0.00500573498575626	21.1088	1.83539687629889	4.4520793e-09	574.382423894314	237.3704	0.00807831566506366	61.4061	3.91661574276683	61.4926	0.595488164026095	736.9165	0.00775408782809199	13.7434	0.684049883193624
DEH1_2015	MOG_MO45-055-1-1-1-1-B/B47	133.5534	0.00501322472927524	20.6007	1.83559625989754	0.0689655	574.382423894314	263.4445	0.0080897619169534	62.5762	5.24458472759145	63.0613	0.596518608263436	712.7127	0.00808749164801474	12.4223	0.684049883193624
DEH1_2015	MOG_MO45-055-1-1-1-1-B/LH195	154.8116	0.00501322472927524	23.1014	1.83559625989754	0.1666667	574.382423894314	270.0473	0.00808972666155743	68.28	3.96920977646564	69.1807	0.596518608263436	719.8244	0.00839218287959562	10.6659	0.683966675827951
DEH1_2015	MOG_MO45-074-1-1-1-1-B/B47	164.792	0.00501322472927524	18.8098	1.83559625989754	0.0333333	574.382423894314	264.1121	0.00808972666155743	61.4808	4.36809847546537	64.9894	0.596518608263436	700.2199	0.00813512076514657	13.9731	0.683966675827951
DEH1_2015	MOG_MO45-074-1-1-1-1-B/LH198	147.3878	0.00502017659007349	19.7982	1.83579174856078	6.2720483e-09	574.382423894314	266.359	0.00810040820712041	61.6149	5.46066968359648	65.3299	0.597469897483691	741.1564	0.00947211399640721	13.6878	0.684049883193624
DEH1_2015	MOG_MO45-078-1-1-1-1-B/LH185	123.0613	0.00499764279276207	21.1974	1.8351932268186	0.2068965	574.382423894314	249.3761	0.00806593514518088	60.8019	5.47500246876151	63.0014	0.594368375271824	694.0308	0.00696533613658274	9.997	0.683966675827951
DEH1_2015	MOG_MO45-085-1-1-1-1-B/B47	155.7798	0.00502664732441097	18.5564	1.83598315681548	0.0701754	574.382423894314	268.3749	0.00811033427991273	61.4153	4.77245306711278	61.6348	0.598350978564772	698.3415	0.00949170611551108	13.3076	0.684049883193624
DEH1_2015	MOG_MO45-085-1-1-1-1-B/LH198	139.1516	0.00500573498575626	17.8928	1.83539687629889	0.0363636	574.382423894314	239.136	0.00807827789142513	61.6265	3.76514978428551	62.9332	0.595488164026095	729.8283	0.00627454504059284	12.1354	0.683966675827951
DEH1_2015	MOG_MO45-128-1-1-1-1-B/LH185	112.3045	0.00500573498575626	20.2985	1.83539687629889	0	574.382423894314	237.7452	0.00807827789142513	56.4967	4.95392070301582	64.4683	0.595488164026095	668.8804	0.00613672461655183	12.83	0.683966675827951
DEH1_2015	MOG_MO45-128-1-1-1-1-B/LH198	153.7798	0.00502664732441097	19.4564	1.83598315681548	4.1491861e-09	574.382423894314	269.3749	0.00811033427991273	60.5688	3.97188199064895	63.6348	0.598350978564772	724.362	0.00966499503103324	NA	0.684049883193624
DEH1_2015	MOG_OH43_0170/LH185	124.1516	0.00500573498575626	20.0928	1.83539687629889	0.0185185	574.382423894314	249.136	0.00807827789142513	61.6457	5.06032341322403	64.9332	0.595488164026095	711.8596	0.0141840186408879	9.0377	0.683966675827951
DEH1_2015	MOG_OH43_0367/LH185	97.5534	0.00501322472927524	20.3007	1.83559625989754	9.7185772e-09	574.382423894314	238.4445	0.0080897619169534	63.4125	5.47573125444787	65.0613	0.596518608263436	716.9803	0.0134776889676777	10.949	0.684049883193624
DEH1_2015	MOG_PHG83-090-1-1-1-1-B/LH185	127.255	0.00502017659007349	22.9158	1.83579174856078	0.0185185	574.382423894314	265.0724	0.00810037463055283	62.4224	3.95779213404604	65.2393	0.597469897483691	691.5213	0.00823510813160769	10.6713	0.683966675827951
DEH1_2015	MOG_PHG83-224-1-1-1-1-B/LH185	127.8116	0.00501322472927524	22.0014	1.83559625989754	0.1052632	574.382423894314	230.0473	0.00808972666155743	60.6611	5.47463807591833	61.1807	0.596518608263436	687.0169	0.0113367432628445	8.1832	0.683966675827951
DEH1_2015	N192/LH82	81.8632	0.00498887316954553	18.9001	1.83498512598354	4.5145307e-09	574.382423894314	198.5104	0.00805263294851789	57.3181	4.08593695056392	57.958	0.593147064305685	721.0751	0.00730009113713335	11.5009	0.684049883193624
DEH1_2015	N542/B47	95.8017	0.00502017659007349	18.9994	1.83579174856078	0.0175439	574.382423894314	231.5809	0.00810040820712041	60.8812	5.45544671951092	61.9954	0.597469897483691	729.929	0.00662483861836376	12.0159	0.684049883193624
DEH1_2015	N542/LH82	88.1026	0.00499764279276207	19.7136	1.8351932268186	0	574.382423894314	212.0081	0.00806593514518088	61.4196	5.47245171885926	63.3394	0.594368375271824	726.0294	0.00802364836334869	10.7477	0.683966675827951
DEH1_2015	NC358/LH195	124.255	0.00502017659007349	25.4158	1.83579174856078	0	574.382423894314	248.0724	0.00810037463055283	65.318	5.47281611170244	67.2393	0.597469897483691	696.6842	0.00886104255746065	12.946	0.683966675827951
DEH1_2015	NC358/PHZ51	148.7798	0.00502664732441097	22.7564	1.83598315681548	4.1492092e-09	574.382423894314	267.3749	0.00811033427991273	63.3622	5.46297750493661	64.6348	0.598350978564772	701.4409	0.0102524208089924	13.1007	0.684049883193624
DEH1_2015	OH43/LH195	124.8116	0.00501322472927524	21.1014	1.83559625989754	0.0517241	574.382423894314	254.0473	0.00808972666155743	62.9983	5.26754147671171	65.1807	0.596518608263436	696.4763	0.00654883470804702	11.3777	0.683966675827951
DEH1_2015	OH7B/LH195	139.3765	0.00502664732441097	18.8348	1.83598315681548	0.0877193	574.382423894314	262.7001	0.00811033427991273	64.7715	5.24944329883383	68.7444	0.598350978564772	721.9707	0.00671300315433118	13.4036	0.684049883193624
DEH1_2015	PB80/LH198	104.792	0.00501322472927524	17.5098	1.83559625989754	0	574.382423894314	214.1121	0.00808972666155743	63.4603	4.15553598361107	67.9894	0.596518608263436	703.9804	0.00739332260045521	4.8291	0.683966675827951
DEH1_2015	PB80/PHZ51	126.8214	0.0100401303207041	18.657	3.67162578499178	0	1148.76507754164	257.2157	0.0162006938597691	61.5623	9.28266475141788	62.7846	1.19496738117428	713.7732	0.0131013851628206	12.9049	1.36800879483304
DEH1_2015	PHAW6/B47	147.1026	0.00499764279276207	19.3136	1.8351932268186	0.0344828	574.382423894314	252.0081	0.00806593514518088	61.385	3.9681165979361	62.3394	0.594368375271824	720.2212	0.00902622438921569	10.9905	0.683966675827951
DEH1_2015	PHAW6/PHZ51	118.136	0.00501322472927524	18.5961	1.83559625989754	7.8121303e-09	574.382423894314	246.6209	0.0080897619169534	61.6524	5.24786426318006	61.3861	0.596518608263436	743.6386	0.0103915924136612	11.9516	0.684049883193624
DEH1_2015	PHG39/PHG35	136.4623	0.00998649825852008	19.7987	3.67014200007159	0	1148.76507754164	257.9433	0.0161184312691859	63.7051	9.44773470937788	64.9797	1.18751164958062	724.4647	0.0131942788309855	13.6624	1.36800879483304
DEH1_2015	PHG39/PHM49	118.0993	0.0100187816357571	21.7593	3.67106936564671	8.2638222e-10	1148.76507754164	240.2412	0.0161679567063738	62.6399	7.40118303780466	65.241	1.19198508853681	713.923	0.015333535560034	12.7595	1.36800879483304
DEH1_2015	PHG39/PHN82	114.3074	0.0100109711412642	20.599	3.67069841941666	9.4360993e-10	1148.76507754164	244.9103	0.0161553654935294	62.7335	9.23116389624861	65.0313	1.19086672879776	729.8895	0.0166995791747935	14.7683	1.36800879483304
DEH1_2015	PHG72/B47	71.1351	0.00500573498575626	18.0696	1.83539687629889	6.8490927e-09	574.382423894314	214.3137	0.00807831566506366	59.8799	4.01828134601372	63.0862	0.595488164026095	706.9185	0.00598573018138924	9.4787	0.684049883193624
DEH1_2015	PHG72/LH82	96.8017	0.00502017659007349	17.9994	1.83579174856078	0	574.382423894314	186.5809	0.00810040820712041	58.3788	5.45544671951092	60.9954	0.597469897483691	734.83	0.0077834760067478	8.8315	0.684049883193624
DEH1_2015	PHG72/PHZ51	125.5917	0.00501322472927524	17.1158	1.83559625989754	0	574.382423894314	226.4908	0.00808972666155743	61.0496	3.95682041979756	62.087	0.596518608263436	734.5639	0.00837630650721834	11.7217	0.683966675827951
DEH1_2015	PHG80/B47	104.8017	0.00502017659007349	18.7994	1.83579174856078	0	574.382423894314	240.5809	0.00810040820712041	61.9987	4.15565744789213	64.9954	0.597469897483691	660.9664	0.00671638110590081	10.3631	0.684049883193624
DEH1_2015	PHG80/PHZ51	150.8634	0.0100187816357571	19.8427	3.67106936564671	0	1148.76507754164	281.4023	0.0161679567063738	64.949	7.19311472434957	67.5866	1.19198508853681	683.2573	0.0143252170164986	13.4696	1.36800879483304
DEH1_2015	PHHV4/LH82	73.4066	0.00500573498575626	19.9088	1.83539687629889	4.4521762e-09	574.382423894314	203.3704	0.00807831566506366	61.0097	1.73183771934779	61.4926	0.595488164026095	708.7091	0.00440822679837075	12.0542	0.684049883193624
DEH1_2015	PHHV4/PHZ51	145.792	0.00501322472927524	18.1098	1.83559625989754	0	574.382423894314	274.1121	0.00808972666155743	61.2696	5.24907890599065	62.9894	0.596518608263436	720.3424	0.00724266596044959	12.3017	0.683966675827951
DEH1_2015	PHM49/LH82	75.3045	0.00500573498575626	17.5985	1.83539687629889	0	574.382423894314	191.7452	0.00807827789142513	61.2217	4.98963120164735	62.4683	0.595488164026095	714.9959	0.00422277725719791	9.8931	0.683966675827951
DEH1_2015	PHM49/PHZ51	120.5917	0.00501322472927524	19.5158	1.83559625989754	0	574.382423894314	259.4908	0.00808972666155743	62.0212	5.25940336988072	65.087	0.596518608263436	681.1328	0.00827496796012936	10.9443	0.683966675827951
DEH1_2015	PHM81/B47	83.5917	0.00501322472927524	18.0158	1.83559625989754	0	574.382423894314	200.4908	0.00808972666155743	56.852	4.18663083956233	57.087	0.596518608263436	720.6338	0.00661706932975361	8.2621	0.683966675827951
DEH1_2015	PHM81/PHZ51	89.5534	0.00501322472927524	17.4007	1.83559625989754	0.0175439	574.382423894314	208.4445	0.0080897619169534	59.4718	5.35936847319277	61.0613	0.596518608263436	769.827	0.00952041870385296	8.5281	0.684049883193624
DEH1_2015	PHN11_LH145_0005/B47	118.5534	0.00501322472927524	17.7007	1.83559625989754	0.0169492	574.382423894314	236.4445	0.0080897619169534	58.7863	4.79698885188682	61.0613	0.596518608263436	708.0117	0.0111056913754816	11.0983	0.684049883193624
DEH1_2015	PHN11_LH145_0028/B47	121.136	0.00501322472927524	16.7961	1.83559625989754	7.8121303e-09	574.382423894314	218.6209	0.0080897619169534	59.7126	4.34295536928603	60.3861	0.596518608263436	737.0865	0.00801114994254104	11.1787	0.684049883193624
DEH1_2015	PHN11_LH145_0028/LH195	109.9042	0.010033361225477	18.7083	3.67144031187675	0	1148.76507754164	213.7584	0.016189781475304	61.7786	9.20966471850106	63.1503	1.19397328362846	775.267	0.0173461191052212	10.8042	1.36800879483304
DEH1_2015	PHN11_OH43_0001/LH185	115.8632	0.00498887316954553	18.8001	1.83498512598354	4.5145438e-09	574.382423894314	253.5104	0.00805263294851789	60.8439	5.19308387242218	62.958	0.593147064305685	704.1491	0.00785643976065186	10.8871	0.684049883193624
DEH1_2015	PHN11_OH43_0036/B47	79.1351	0.00500573498575626	19.5696	1.83539687629889	6.8490927e-09	574.382423894314	224.3137	0.00807831566506366	57.6526	3.75579703464392	64.0862	0.595488164026095	753.0611	0.00628704346140049	9.329	0.684049883193624
DEH1_2015	PHN11_OH43_0036/LH185	86.1351	0.00500573498575626	18.5696	1.83539687629889	0.0175439	574.382423894314	215.3137	0.00807831566506366	59.1727	2.69930071798751	62.0862	0.595488164026095	695.91	0.00586142156362676	11.7561	0.684049883193624
DEH1_2015	PHN11_OH43_0088/B47	110.993	0.0100531478115255	19.8849	3.67199673122182	0	1148.76507754164	255.6074	0.0162208398003202	61.4146	7.05901815805977	63.7413	1.19670705187947	671.3862	0.0123231051211773	11.4657	1.36800879483304
DEH1_2015	PHN11_OH43_0088/LH185	105.7798	0.00502664732441097	19.3564	1.83598315681548	4.1492225e-09	574.382423894314	230.3749	0.00811033427991273	60.2588	3.68546921591041	63.6348	0.598350978564772	678.4983	0.00604720889995656	11.0751	0.684049883193624
DEH1_2015	PHN11_OH43_0142/LH195	130.255	0.00502017659007349	20.9158	1.83579174856078	0.0847457	574.382423894314	243.0724	0.00810037463055283	63.355	5.24944329883383	65.2393	0.597469897483691	681.1883	0.0067035448899362	11.4608	0.683966675827951
DEH1_2015	PHN11_OH43_0142/LH198	123.792	0.00501322472927524	19.6098	1.83559625989754	0	574.382423894314	239.1121	0.00808972666155743	61.7457	3.97236784777319	62.9894	0.596518608263436	708.4229	0.00853135448426449	12.5895	0.683966675827951
DEH1_2015	PHN11_PHG47_0172/PB80	143.8116	0.00501322472927524	19.0014	1.83559625989754	3.139345e-09	574.382423894314	241.0473	0.00808972666155743	61.6148	5.47269464742138	62.1807	0.596518608263436	725.5967	0.0102220192448657	10.9353	0.683966675827951
DEH1_2015	PHN11_PHG47_0251/B47	115.7914	0.00996827377137017	17.3436	3.66977105384155	1.2770156e-09	1148.76507754164	237.5921	0.0160907306009282	59.1139	8.02720994238585	60.7358	1.18496427461945	704.8573	0.0182226975375409	10.6507	1.36800879483304
DEH1_2015	PHN11_PHG47_0385/LH185	116.8116	0.00501322472927524	19.1014	1.83559625989754	3.139345e-09	574.382423894314	234.0473	0.00808972666155743	62.3658	4.35048615471173	63.1807	0.596518608263436	719.7454	0.0096460785022433	11.5467	0.683966675827951
DEH1_2015	PHN11_PHG47_0385/LH198	101.3765	0.00502664732441097	19.4348	1.83598315681548	0	574.382423894314	226.7001	0.00811033427991273	61.2701	5.29304897573423	62.7444	0.598350978564772	747.8184	0.0064985032296595	11.9823	0.684049883193624
DEH1_2015	PHN11_PHW65_0015/B47	99.094	0.0100401303207041	19.1181	3.67162578499178	0.0666667	1148.76507754164	225.3737	0.0161998544455795	60.7653	8.3758124290269	60.9626	1.19484311898105	704.5108	0.0158611715952106	12.2134	1.36800879483304
DEH1_2015	PHN11_PHW65_0015/LH195	111.2062	0.00502664732441097	21.6135	1.83598315681548	0	574.382423894314	227.8399	0.00811030322158772	63.5748	4.39967918854086	63.8478	0.598350978564772	699.4421	0.00702141013263865	10.6035	0.683966675827951
DEH1_2015	PHN11_PHW65_0065/B47	107.5636	0.00499764279276207	17.9903	1.8351932268186	1.3039621e-08	574.382423894314	223.2236	0.00806597627647617	60.6819	5.0959124475745	62.7109	0.594368375271824	721.6601	0.00646472371396317	9.0099	0.684049883193624
DEH1_2015	PHN11_PHW65_0065/LH195	116.3878	0.00502017659007349	19.7982	1.83579174856078	6.2721263e-09	574.382423894314	231.359	0.00810040820712041	61.8381	3.03721434789532	65.3299	0.597469897483691	727.9949	0.00769666265140824	11.9726	0.684049883193624
DEH1_2015	PHN11_PHW65_0101/B47	94.1351	0.00500573498575626	19.5696	1.83539687629889	6.8491013e-09	574.382423894314	230.3137	0.00807831566506366	60.6029	3.73952082098193	64.0862	0.595488164026095	712.0138	0.00637351902158308	11.7724	0.684049883193624
DEH1_2015	PHN11_PHW65_0101/LH195	100.3765	0.00502664732441097	19.9348	1.83598315681548	0.0172414	574.382423894314	236.7001	0.00811033427991273	60.6486	5.0820655195337	60.7444	0.598350978564772	720.02	0.0101858751630706	12.7515	0.684049883193624
DEH1_2015	PHN11_PHW65_0237/B47	114.136	0.00501322472927524	20.4961	1.83559625989754	0.0188679	574.382423894314	242.6209	0.0080897619169534	61.5591	4.34854272621477	61.3861	0.596518608263436	693.3257	0.010973613469109	13.1057	0.684049883193624
DEH1_2015	PHN11_PHW65_0237/LH195	134.5917	0.00501322472927524	21.1158	1.83559625989754	0	574.382423894314	257.4908	0.00808972666155743	64.9968	4.39433476017424	66.087	0.596518608263436	680.9389	0.00802094600209298	12.7809	0.683966675827951
DEH1_2015	PHN11_PHW65_0275/LH198	136.8017	0.00502017659007349	19.2994	1.83579174856078	0	574.382423894314	254.5809	0.00810040820712041	61.7669	5.20255808634483	61.9954	0.597469897483691	702.5955	0.00666064490500187	13.3593	0.684049883193624
DEH1_2015	PHN11_PHW65_0275/PB80	121.136	0.00501322472927524	18.3961	1.83559625989754	7.8121386e-09	574.382423894314	241.6209	0.0080897619169534	61.6203	5.26304729831251	63.3861	0.596518608263436	696.7187	0.00705856759990461	12.5496	0.684049883193624
DEH1_2015	PHN11_PHW65_0294/B47	100.3765	0.00502664732441097	19.0348	1.83598315681548	0	574.382423894314	220.7001	0.00811033427991273	60.4019	4.4013796884757	60.7444	0.598350978564772	672.3674	0.0082479443475723	11.4081	0.684049883193624
DEH1_2015	PHN11_PHW65_0294/LH195	115.8632	0.00498887316954553	19.8001	1.83498512598354	4.5145524e-09	574.382423894314	220.5104	0.00805263294851789	61.2521	3.88989360093372	60.958	0.593147064305685	696.8572	0.00598741915717406	12.2073	0.684049883193624
DEH1_2015	PHN11_PHW65_0312/B47	101.1351	0.00500573498575626	18.8696	1.83539687629889	6.8491013e-09	574.382423894314	221.3137	0.00807831566506366	59.9351	5.1686695519292	63.0862	0.595488164026095	749.9082	0.00813106722326301	10.1256	0.684049883193624
DEH1_2015	PHN11_PHW65_0312/LH198	118.5636	0.00499764279276207	18.5903	1.8351932268186	1.3039621e-08	574.382423894314	219.2236	0.00806597627647617	58.6579	2.59508436483837	59.7109	0.594368375271824	737.8573	0.00446801654115325	11.7988	0.684049883193624
DEH1_2015	PHN11_PHW65_0323/B47	119.255	0.00502017659007349	19.4158	1.83579174856078	0	574.382423894314	243.0724	0.00810037463055283	61.7432	5.26268290546933	61.2393	0.597469897483691	712.8434	0.009602840722152	12.5248	0.683966675827951
DEH1_2015	PHN11_PHW65_0323/LH195	117.3576	0.0100031606467714	21.7916	3.67051294630164	3.7940542e-09	1148.76507754164	242.1798	0.0161444531090642	64.3414	10.658612127261	65.3221	1.18987263125194	696.4039	0.0238922514520125	11.4365	1.36800879483304
DEH1_2015	PHN11_PHW65_0359/LH195	100.136	0.00501322472927524	19.7961	1.83559625989754	7.8121386e-09	574.382423894314	214.6209	0.0080897619169534	60.7442	5.00542155818509	61.3861	0.596518608263436	728.5353	0.00847224033179592	12.0147	0.684049883193624
DEH1_2015	PHP02/B47	102.8462	0.010026071430617	19.2484	3.67125483876173	0.0086207	1148.76507754164	219.5521	0.0161788690908389	60.1989	7.72512827539062	61.3991	1.19297918608263	690.9125	0.013024367867033	12.7518	1.36800879483304
DEH1_2015	PHT55/LH82	116.5636	0.00499764279276207	20.2903	1.8351932268186	1.3039621e-08	574.382423894314	222.2236	0.00806597627647617	59.9953	5.36179775881396	61.7109	0.594368375271824	716.5817	0.0104257097245145	12.7013	0.684049883193624
DEH1_2015	PHT55/PHZ51	143.5636	0.00499764279276207	19.9903	1.8351932268186	1.3039621e-08	574.382423894314	274.2236	0.00806597627647617	62.1832	4.1996275176357	65.7109	0.594368375271824	708.8191	0.0093765179669866	14.9451	0.684049883193624
DEH1_2015	PHV63/LH195	124.5982	0.0100031606467714	20.5335	3.67051294630164	0.009434	1148.76507754164	241.8449	0.0161444531090642	66.0982	9.07957647348623	68.5438	1.18987263125194	717.6107	0.0136050377418529	11.5096	1.36800879483304
DEH1_2015	PHV63/LH82	95.7798	0.00502664732441097	19.7564	1.83598315681548	4.149232e-09	574.382423894314	206.3749	0.00811033427991273	61.5177	2.89886653176844	61.6348	0.598350978564772	702.86	0.00608402857206556	8.7168	0.684049883193624
DEH1_2015	PHW52/PHG35	115.6857	0.0100401303207041	19.9361	3.67162578499178	0	1148.76507754164	229.4328	0.0161998544455795	61.0641	10.5670280593421	61.8609	1.19484311898105	696.6953	0.0171843152250358	15.3891	1.36800879483304
DEH1_2015	PHW52/PHM49	122.2914	0.0100531478115255	22.5241	3.67199673122182	0	1148.76507754164	245.77	0.0162208398003202	62.0617	8.21462932806081	64.2961	1.19670705187947	711.1169	0.0162769974334324	11.9463	1.36800879483304
DEH1_2015	PHW52/PHN82	105.0174	0.0100468994159312	21.5361	3.6718112581068	0	1148.76507754164	240.7236	0.0162107668300446	62.4753	7.40689185901446	64.437	1.19583721652687	700.7166	0.0135634889375464	12.0751	1.36800879483304
DEH1_2015	PHW52/TX205	127.7497	0.0100057641449357	22.1217	3.67069841941666	0.0269537	1148.76507754164	267.5243	0.0161486501800124	64.0071	8.03959929905393	66.5742	1.19018328673501	657.8059	0.0156233638047085	15.5002	1.36800879483304
DEH1_2015	PHW53/LH82	78.4066	0.00500573498575626	17.4088	1.83539687629889	4.4521841e-09	574.382423894314	186.3704	0.00807831566506366	61.1837	4.01937452454325	61.4926	0.595488164026095	728.648	0.00643432214983647	7.1645	0.684049883193624
DEH1_2015	PHW53/PHZ51	88.5534	0.00501322472927524	17.0007	1.83559625989754	0.0166667	574.382423894314	207.4445	0.0080897619169534	66.4778	5.47573125444787	70.0613	0.596518608263436	744.4125	0.0108661946091947	5.4102	0.684049883193624
DEH1_2015	PHW65/B47	95.792	0.00501322472927524	19.7098	1.83559625989754	0	574.382423894314	231.1121	0.00808972666155743	60.6282	5.46115554072072	60.9894	0.596518608263436	730.0548	0.00883266776427573	12.8627	0.683966675827951
DEH1_2015	PHW65/LH82	110.1516	0.00500573498575626	19.0928	1.83539687629889	0	574.382423894314	214.136	0.00807827789142513	61.5899	5.16757637339966	62.9332	0.595488164026095	704.8274	0.00750411941193917	11.3524	0.683966675827951
DEH1_2015	PHW65_MOG_0012/LH195	122.3045	0.00500573498575626	20.3985	1.83539687629889	0	574.382423894314	221.7452	0.00807827789142513	64.5475	4.00917152493425	65.4683	0.595488164026095	692.1938	0.0065444433710065	11.4098	0.683966675827951
DEH1_2015	PHW65_MOG_0012/LH198	121.5917	0.00501322472927524	20.3158	1.83559625989754	0	574.382423894314	231.4908	0.00808972666155743	62.1714	4.12359087769239	62.087	0.596518608263436	711.7792	0.00749128319597456	16.0356	0.683966675827951
DEH1_2015	PHW65_MOG_0029/B47	129.2062	0.00502664732441097	20.1135	1.83598315681548	0	574.382423894314	250.8399	0.00811030322158772	61.6902	4.22659258803093	60.8478	0.598350978564772	675.7245	0.00858979304641913	12.8929	0.683966675827951
DEH1_2015	PHW65_MOG_0029/LH195	120.3878	0.00502017659007349	21.5982	1.83579174856078	0.0185185	574.382423894314	236.359	0.00810040820712041	63.7373	3.97078881211941	65.3299	0.597469897483691	699.3085	0.00804729402433611	11.3344	0.684049883193624
DEH1_2015	PHW65_MOG_0137/B47	103.3045	0.00500573498575626	20.9985	1.83539687629889	0	574.382423894314	236.7452	0.00807827789142513	62.4332	4.36117501144497	62.4683	0.595488164026095	738.3499	0.00857830801108238	11.9557	0.683966675827951
DEH1_2015	PHW65_MOG_0137/LH198	143.5917	0.00501322472927524	19.9158	1.83559625989754	0	574.382423894314	247.4908	0.00808972666155743	61.0481	5.25940336988072	63.087	0.596518608263436	694.4751	0.00713085576349475	13.473	0.683966675827951
DEH1_2015	PHW65_MOG_0176/LH198	130.1026	0.00499764279276207	19.6136	1.8351932268186	0.0178571	574.382423894314	229.0081	0.00806593514518088	61.9058	4.30797365634087	61.3394	0.594368375271824	728.2434	0.00656335989979645	11.2561	0.683966675827951
DEH1_2015	PHW65_MOG_0271/LH185	121.1516	0.00500573498575626	21.6928	1.83539687629889	0.02	574.382423894314	245.136	0.00807827789142513	62.4901	5.08461626943595	63.9332	0.595488164026095	683.8079	0.0136550314250835	12.0585	0.683966675827951
DEH1_2015	PHW65_MOG_0311/B47	123.255	0.00502017659007349	19.9158	1.83579174856078	0	574.382423894314	253.0724	0.00810037463055283	61.9526	4.01609498895465	62.2393	0.597469897483691	722.7734	0.00889515986831394	14.6751	0.683966675827951
DEH1_2015	PHW65_MOG_0311/LH195	120.792	0.00501322472927524	20.0098	1.83559625989754	0.14	574.382423894314	245.1121	0.00808972666155743	64.862	5.26001069128602	65.9894	0.596518608263436	679.4486	0.0080226349778778	13.0776	0.683966675827951
DEH1_2015	PHZ51/LH82	126.7196	0.00497933603507016	18.4871	1.83477275926684	0	574.382423894314	251.6738	0.00803811108303737	59.1953	2.69942218226857	60.5136	0.591809816713265	709.1796	0.00385762069252061	8.1731	0.683966675827951
DEH1_2015	Q381/B47	90.3765	0.00502664732441097	18.0348	1.83598315681548	0	574.382423894314	211.7001	0.00811033427991273	59.6572	5.24944329883383	60.7444	0.598350978564772	721.833	0.0100889279530222	11.2436	0.684049883193624
DEH1_2015	R226/LH82	106.792	0.00501322472927524	20.4098	1.83559625989754	0	574.382423894314	203.1121	0.00808972666155743	61.5483	3.88479210112922	62.9894	0.596518608263436	684.4593	0.0106044033625481	8.7458	0.683966675827951
DEH1_2015	R226/PHZ51	158.8017	0.00502017659007349	18.2994	1.83579174856078	0.0169492	574.382423894314	271.5809	0.00810040820712041	66.105	5.47524539732363	67.9954	0.597469897483691	676.4403	0.00885530003979227	13.5823	0.684049883193624
DEH1_2015	R227/LH82	122.136	0.00501322472927524	18.2961	1.83559625989754	0.6727273	574.382423894314	224.6209	0.0080897619169534	60.6697	2.94174342298248	62.3861	0.596518608263436	710.8187	0.0047618983277113	11.9699	0.684049883193624
DEH1_2015	R227/PHZ51	117.8017	0.00502017659007349	19.3994	1.83579174856078	0.5263158	574.382423894314	255.5809	0.00810040820712041	62.1565	5.20255808634483	64.9954	0.597469897483691	691.7543	0.00614212933906324	12.7565	0.684049883193624
DEH1_2015	REDEAR-B/LH195	160.9841	0.0100401303207041	24.4253	3.67162578499178	0	1148.76507754164	273.5954	0.0161998544455795	65.6328	9.32894264250159	69.4157	1.19484311898105	700.4775	0.0114461888937006	12.8752	1.36800879483304
DEH1_2015	SD101/B47	95.7196	0.00497933603507016	20.7871	1.83477275926684	0.0666667	574.382423894314	238.6738	0.00803811108303737	60.1675	4.01779548888948	62.5136	0.591809816713265	686.1565	0.00822936561393932	6.2339	0.683966675827951
DEH1_2015	SD101/LH82	127.255	0.00502017659007349	18.8158	1.83579174856078	0	574.382423894314	227.0724	0.00810037463055283	60.7628	5.23911883494377	61.2393	0.597469897483691	717.8939	0.0110972464965575	10.0734	0.683966675827951
DEH1_2015	SD101/PHZ51	123.255	0.00502017659007349	19.0158	1.83579174856078	0	574.382423894314	263.0724	0.00810037463055283	61.4682	4.38048783213345	63.2393	0.597469897483691	721.1401	0.00681603067720497	11.6099	0.683966675827951
DEH1_2015	TX29A/PHZ51	151.792	0.00501322472927524	19.9098	1.83559625989754	0.0517241	574.382423894314	310.1121	0.00808972666155743	63.7838	4.35923158294802	67.9894	0.596518608263436	674.6496	0.0062289426944028	12.1627	0.683966675827951
DEH1_2015	TX303/LH195	175.7196	0.00497933603507016	25.7871	1.83477275926684	0	574.382423894314	285.6738	0.00803811108303737	67.1888	2.87032242571943	70.5136	0.591809816713265	683.8812	0.00822733884299754	11.0375	0.683966675827951
DEH1_2015	TX303/LH82	128.9738	0.0100265921302499	21.1988	3.67125483876173	0.0175439	1148.76507754164	243.3341	0.0161797085050285	62.8257	10.4869830981238	65.7834	1.19304131717925	658.3492	0.0181173054485683	12.6835	1.36800879483304
DEH1_2015	TX714/PHZ51	162.3374	0.0100021192475057	19.9007	3.67051294630164	3.8270115e-09	1148.76507754164	290.7788	0.016142774280685	63.7122	8.66939159634796	66.0694	1.1896862379621	730.6548	0.0117339903674333	13.6041	1.36800879483304
DEH1_2015	TX772/LH195	104.0613	0.00499764279276207	23.8974	1.8351932268186	0	574.382423894314	226.3761	0.00806593514518088	63.8276	5.46237018353131	67.0014	0.594368375271824	693.8665	0.00933733372877887	11.6766	0.683966675827951
DEH1_2015	W10001_0003/B47	118.3878	0.00502017659007349	19.4982	1.83579174856078	0.0847458	574.382423894314	231.359	0.00810040820712041	60.3629	5.14085423156655	62.3299	0.597469897483691	689.9653	0.00918025898079094	9.1046	0.684049883193624
DEH1_2015	W10001_0007/B47	99.5636	0.00499764279276207	19.7903	1.8351932268186	0.0169492	574.382423894314	222.2236	0.00806597627647617	59.2175	4.32971576265053	62.7109	0.594368375271824	682.4357	0.00634514422839817	9.3005	0.684049883193624
DEH1_2015	W10001_0012/B47	121.792	0.00501322472927524	16.7098	1.83559625989754	0.3666667	574.382423894314	232.1121	0.00808972666155743	59.8046	5.47281611170244	60.9894	0.596518608263436	691.7214	0.00949846201865035	6.8667	0.683966675827951
DEH1_2015	W10001_0014/B47	117.136	0.00501322472927524	17.4961	1.83559625989754	7.8121639e-09	574.382423894314	237.6209	0.0080897619169534	61.4928	5.47281611170244	63.3861	0.596518608263436	702.7871	0.00844521671923885	11.2916	0.684049883193624
DEH1_2015	W10001_0019/B47	111.4066	0.00500573498575626	18.6088	1.83539687629889	0.037037	574.382423894314	233.3704	0.00807831566506366	60.2385	4.14691201965584	60.4926	0.595488164026095	693.1764	0.00817464279851127	8.7386	0.684049883193624
DEH1_2015	W10001_0033/B47	118.5534	0.00501322472927524	18.2007	1.83559625989754	0.0877193	574.382423894314	242.4445	0.0080897619169534	60.5158	3.27224773174565	61.0613	0.596518608263436	713.6923	0.0064515497028416	11.3458	0.684049883193624
DEH1_2015	W10002_0001/B47	122.0613	0.00499764279276207	19.1974	1.8351932268186	0.0178571	574.382423894314	237.3761	0.00806593514518088	59.9113	5.46237018353131	61.0014	0.594368375271824	682.0639	0.00727576988583199	9.5615	0.683966675827951
DEH1_2015	W10002_0004/B47	122.3878	0.00502017659007349	17.8982	1.83579174856078	0.0877193	574.382423894314	244.359	0.00810040820712041	60.2321	5.47488100448045	62.3299	0.597469897483691	723.8956	0.00719165889174814	11.5711	0.684049883193624
DEH1_2015	W10004_0032/LH82	78.0613	0.00499764279276207	17.7974	1.8351932268186	0	574.382423894314	185.3761	0.00806593514518088	58.521	4.76978085292947	59.0014	0.594368375271824	741.9466	0.00808073574487548	9.0418	0.683966675827951
DEH1_2015	W10004_0032/PHZ51	114.6434	0.0100114918408971	17.6812	3.67088389253168	6.9879035e-10	1148.76507754164	234.2249	0.016156204907719	60.7049	7.27801825681023	62.5097	1.19099099099099	739.8994	0.0124460625583119	9.4747	1.36800879483304
DEH1_2015	W10004_0076/LH185	107.1516	0.00500573498575626	18.9928	1.83539687629889	0	574.382423894314	223.136	0.00807827789142513	61.3139	5.26584097677688	62.9332	0.595488164026095	697.5122	0.00822260971080005	11.3668	0.683966675827951
DEH1_2015	W10004_0076/PHZ51	109.3765	0.00502664732441097	18.6348	1.83598315681548	0	574.382423894314	235.7001	0.00811033427991273	60.6484	5.25770286994589	60.7444	0.598350978564772	748.5482	0.00848169859619089	12.2631	0.684049883193624
DEH1_2015	W10004_0097/LH82	95.1026	0.00499764279276207	17.7136	1.8351932268186	0.0338983	574.382423894314	203.0081	0.00806593514518088	60.4982	4.39980065282192	61.3394	0.594368375271824	740.4849	0.00621374191233945	10.2018	0.683966675827951
DEH1_2015	W10004_0097/PHZ51	119.255	0.00502017659007349	17.7158	1.83579174856078	0	574.382423894314	224.0724	0.00810037463055283	59.2574	3.27091162465399	60.2393	0.597469897483691	761.4145	0.00679711414841503	14.0308	0.683966675827951
DEH1_2015	W10004_0127/LH82	125.7798	0.00502664732441097	16.2564	1.83598315681548	0.05	574.382423894314	226.3749	0.00811033427991273	59.0377	5.46297750493661	59.6348	0.598350978564772	712.3427	0.0136155093917188	10.1888	0.684049883193624
DEH1_2015	W10004_0127/PHZ51	154.5534	0.00501322472927524	18.1007	1.83559625989754	9.7186525e-09	574.382423894314	278.4445	0.0080897619169534	62.0947	5.46079114787754	63.0613	0.596518608263436	737.9476	0.00874517881862224	12.2566	0.684049883193624
DEH1_2015	W10004_0204/PHZ51	114.792	0.00501322472927524	18.2098	1.83559625989754	0	574.382423894314	264.1121	0.00808972666155743	62.8856	5.47512393304257	62.9894	0.596518608263436	695.3606	0.00830165377752946	11.4638	0.683966675827951
DEH1_2015	W10004_0232/LH185	119.1026	0.00499764279276207	19.2136	1.8351932268186	0.0185185	574.382423894314	243.0081	0.00806593514518088	61.1287	4.06662412987544	64.3394	0.594368375271824	654.5016	0.0061461828809468	11.6169	0.683966675827951
DEH1_2015	W10004_0232/PHZ51	134.1516	0.00500573498575626	19.2928	1.83539687629889	0	574.382423894314	261.136	0.00807827789142513	62.6458	4.01500181042511	63.9332	0.595488164026095	679.5502	0.00584993652829001	12.0987	0.683966675827951
DEH1_2015	W10005_0029/B47	104.1026	0.00499764279276207	17.4136	1.8351932268186	0	574.382423894314	239.0081	0.00806593514518088	60.3849	4.16938291165186	61.3394	0.594368375271824	694.5062	0.00629852849673724	10.8228	0.683966675827951
DEH1_2015	W10005_0037/B47	127.7798	0.00502664732441097	18.2564	1.83598315681548	4.1492574e-09	574.382423894314	247.3749	0.00811033427991273	59.2813	5.47512393304257	60.6348	0.598350978564772	711.3989	0.00814761918595421	12.5462	0.684049883193624
DEH1_2015	W10005_0107/B47	113.6825	0.0100265921302499	17.2511	3.67125483876173	0.0083333	1148.76507754164	238.7459	0.0161797085050285	60.7727	9.14723207803643	61.621	1.19304131717925	710.0652	0.0169235373638601	10.3391	1.36800879483304
DEH1_2015	W10005_0107/LH198	122.4066	0.00500573498575626	19.3088	1.83539687629889	0.0181818	574.382423894314	242.3704	0.00807831566506366	61.2565	3.25038416115492	61.4926	0.595488164026095	730.6794	0.00883131658364788	11.5608	0.684049883193624
DEH1_2015	W10005_0111/B47	96.255	0.00502017659007349	18.0158	1.83579174856078	0	574.382423894314	219.0724	0.00810037463055283	60.3762	3.89390192220869	62.2393	0.597469897483691	704.0424	0.0075774209610002	10.4342	0.683966675827951
DEH1_2015	W10005_0111/LH195	93.5534	0.00501322472927524	19.6007	1.83559625989754	0.0208333	574.382423894314	214.4445	0.0080897619169534	65.3968	5.47573125444787	69.0613	0.596518608263436	761.5311	0.0121197524366854	8.5024	0.684049883193624
DEH1_2015	W10005_0147/B47	103.6778	0.0100109711412642	17.2001	3.67069841941666	0.0084746	1148.76507754164	226.1678	0.0161553654935294	59.8992	8.44310364073392	60.8502	1.19086672879776	705.3008	0.0147042231826114	9.7403	1.36800879483304
DEH1_2015	W10005_0147/CG102	89.136	0.00501322472927524	16.4961	1.83559625989754	7.8121655e-09	574.382423894314	229.6209	0.0080897619169534	56.8196	3.08239906044949	58.3861	0.596518608263436	711.5508	0.0080520231565336	9.7893	0.684049883193624
DEH1_2015	W10005_0220/B47	107.2062	0.00502664732441097	17.9135	1.83598315681548	0	574.382423894314	225.8399	0.00811030322158772	61.6902	5.47305904026456	61.8478	0.598350978564772	722.5955	0.0109688843369115	10.817	0.683966675827951
DEH1_2015	W10006_0003/B47	127.5917	0.00501322472927524	16.2158	1.83559625989754	0.1	574.382423894314	253.4908	0.00808972666155743	60.179	5.47269464742138	61.087	0.596518608263436	681.802	0.00885969137683279	11.6952	0.683966675827951
DEH1_2015	W10006_0004/B47	129.5636	0.00499764279276207	17.3903	1.8351932268186	0.1272727	574.382423894314	240.2236	0.00806597627647617	59.8113	4.0174310960463	59.7109	0.594368375271824	752.4933	0.00966567062134717	8.6583	0.684049883193624
DEH1_2015	W10008_0009/B47	104.1351	0.00500573498575626	18.1696	1.83539687629889	0.0357143	574.382423894314	212.3137	0.00807831566506366	58.3714	3.00393313488499	60.0862	0.595488164026095	675.2876	0.00497504707175512	8.5038	0.684049883193624
DEH1_2015	W10008_0018/B47	114.2062	0.00502664732441097	16.9135	1.83598315681548	0.0689655	574.382423894314	239.8399	0.00811030322158772	60.9051	5.47305904026456	60.8478	0.598350978564772	690.9231	0.0055455830918661	11.2831	0.683966675827951
DEH1_2015	W10008_0037/B47	109.136	0.00501322472927524	18.2961	1.83559625989754	0.0175439	574.382423894314	244.6209	0.0080897619169534	59.5034	5.0574082704786	61.3861	0.596518608263436	704.5156	0.00744905880135415	10.474	0.684049883193624
DEH1_2015	W10008_0069/B47	122.929	0.0100187816357571	18.4496	3.67106936564671	0.059322	1148.76507754164	246.0949	0.0161679567063738	61.0284	9.10629861531934	64.2648	1.19198508853681	706.1881	0.0162685525545083	11.3434	1.36800879483304
DEH1_2015	W10008_0092/B47	94.0613	0.00499764279276207	18.5974	1.8351932268186	0	574.382423894314	229.3761	0.00806593514518088	60.1727	4.37052776108656	64.0014	0.594368375271824	692.2438	0.00440113310007452	9.9158	0.683966675827951
DEH1_2015	W10008_0119/B47	123.8116	0.00501322472927524	20.5014	1.83559625989754	3.139442e-09	574.382423894314	228.0473	0.00808972666155743	61.6172	5.47269464742138	61.1807	0.596518608263436	726.9707	0.0100159641991181	9.85	0.683966675827951
DEH1_2015	WF9/H95	119.434	0.0100031606467714	19.8444	3.67051294630164	0.0789474	1148.76507754164	262.4844	0.0161444531090642	62.1068	6.92309962755407	66.5896	1.18987263125194	682.6759	0.0121731240714856	9.3322	1.36800879483304
DEH1_2015	Z013E0002/LH185	96.7798	0.00502664732441097	20.8564	1.83598315681548	4.1492591e-09	574.382423894314	236.3749	0.00811033427991273	62.2901	5.46297750493661	63.6348	0.598350978564772	733.2909	0.00636270957656026	13.8071	0.684049883193624
DEH1_2015	Z013E0006/LH185	104.3765	0.00502664732441097	21.0348	1.83598315681548	0	574.382423894314	243.7001	0.00811033427991273	61.3184	4.95938659566351	64.7444	0.598350978564772	686.7431	0.00658700556078387	12.8	0.684049883193624
DEH1_2015	Z013E0007/LH185	121.1026	0.00499764279276207	21.1136	1.8351932268186	0	574.382423894314	228.0081	0.00806593514518088	63.6129	5.20571615765238	64.3394	0.594368375271824	695.5971	0.0128058144004778	12.9763	0.683966675827951
DEH1_2015	Z013E0012/LH185	121.3045	0.00500573498575626	21.5985	1.83539687629889	0.02	574.382423894314	238.7452	0.00807827789142513	64.4193	5.47305904026456	66.4683	0.595488164026095	689.0692	0.00830942306613962	13.2686	0.683966675827951
DEH1_2015	Z013E0020/LH82	86.2062	0.00502664732441097	20.4135	1.83598315681548	0	574.382423894314	210.8399	0.00811030322158772	62.2244	4.18748108952974	63.8478	0.598350978564772	677.2212	0.00830435613878517	8.6323	0.683966675827951
DEH1_2015	Z013E0026/LH185	127.136	0.00501322472927524	21.5961	1.83559625989754	7.8121672e-09	574.382423894314	251.6209	0.0080897619169534	62.3888	4.39955772425981	64.3861	0.596518608263436	698.2184	0.0114924668302046	15.8762	0.684049883193624
DEH1_2015	Z013E0028/LH185	141.1351	0.00500573498575626	21.9696	1.83539687629889	6.8491321e-09	574.382423894314	246.3137	0.00807831566506366	61.7193	3.80632617556471	64.0862	0.595488164026095	667.5511	0.00802195938756387	12.8878	0.684049883193624
DEH1_2015	Z013E0034/LH185	106.3765	0.00502664732441097	20.7348	1.83598315681548	0	574.382423894314	239.7001	0.00811033427991273	60.5297	5.24944329883383	63.7444	0.598350978564772	673.2715	0.00695554007703081	14.3648	0.684049883193624
DEH1_2015	Z013E0044/PB80	153.5917	0.00501322472927524	20.4158	1.83559625989754	0	574.382423894314	268.4908	0.00808972666155743	68.1759	5.26960636948973	70.087	0.596518608263436	691.314	0.00574522002963139	11.583	0.683966675827951
DEH1_2015	Z013E0052/PHZ51	159.7798	0.00502664732441097	20.4564	1.83598315681548	0.0344828	574.382423894314	279.3749	0.00811033427991273	61.8025	5.47512393304257	64.6348	0.598350978564772	703.3728	0.00875328590238936	12.6285	0.684049883193624
DEH1_2015	Z013E0055/LH185	128.8116	0.00501322472927524	22.2014	1.83559625989754	0.0178571	574.382423894314	252.0473	0.00808972666155743	63.4199	5.26073947697238	64.1807	0.596518608263436	707.7679	0.01122155511432	12.178	0.683966675827951
DEH1_2015	Z013E0059/PHZ51	125.3765	0.00502664732441097	20.1348	1.83598315681548	0	574.382423894314	262.7001	0.00811033427991273	62.4674	3.42553565444287	63.7444	0.598350978564772	721.3887	0.00607693487376933	10.7059	0.684049883193624
DEH1_2015	Z013E0063/LH185	120.3878	0.00502017659007349	21.7982	1.83579174856078	6.2721535e-09	574.382423894314	242.359	0.00810040820712041	59.6983	4.15590037645425	63.3299	0.597469897483691	690.6793	0.006880211757028	13.3308	0.684049883193624
DEH1_2015	Z013E0072/LH82	101.3765	0.00502664732441097	19.0348	1.83598315681548	0	574.382423894314	210.7001	0.00811033427991273	60.4308	5.39677947175913	60.7444	0.598350978564772	764.6911	0.0079885176670245	9.7305	0.684049883193624
DEH1_2015	Z013E0078/LH185	127.2062	0.00502664732441097	22.3135	1.83598315681548	0	574.382423894314	248.8399	0.00811030322158772	61.9901	4.18590205387597	63.8478	0.598350978564772	667.9365	0.0068102881595366	15.7885	0.683966675827951
DEH1_2015	Z013E0080/PHZ51	134.0613	0.00499764279276207	20.7974	1.8351932268186	0	574.382423894314	255.3761	0.00806593514518088	63.9384	3.95329795564683	66.0014	0.594368375271824	732.466	0.00806891291438176	12.9139	0.683966675827951
DEH1_2015	Z013E0082/LH185	134.3045	0.00500573498575626	22.2985	1.83539687629889	0	574.382423894314	263.7452	0.00807827789142513	64.6267	4.34890711905795	65.4683	0.595488164026095	646.0297	0.00979842411803374	13.9461	0.683966675827951
DEH1_2015	Z013E0082/LH82	112.792	0.00501322472927524	20.4098	1.83559625989754	0	574.382423894314	209.1121	0.00808972666155743	60.7682	3.97188199064895	62.9894	0.596518608263436	669.058	0.00824017505896214	11.804	0.683966675827951
DEH1_2015	Z013E0087/LH82	86.5534	0.00501322472927524	20.3007	1.83559625989754	9.7186557e-09	574.382423894314	203.4445	0.0080897619169534	61.285	5.1187477324137	64.0613	0.596518608263436	756.8816	0.0134820803047183	12.175	0.684049883193624
DEH1_2015	Z013E0090/LH82	76.5534	0.00501322472927524	20.3007	1.83559625989754	0.2280702	574.382423894314	192.4445	0.0080897619169534	60.114	4.41291879517636	63.0613	0.596518608263436	746.4106	0.011212772440239	8.3773	0.684049883193624
DEH1_2015	Z022E0003/LH185	111.1516	0.00500573498575626	19.4928	1.83539687629889	0	574.382423894314	230.136	0.00807827789142513	59.8535	3.7732878911165	62.9332	0.595488164026095	691.9751	0.00800405624424481	9.8087	0.683966675827951
DEH1_2015	Z022E0005/LH185	142.7196	0.00497933603507016	19.6871	1.83477275926684	0	574.382423894314	265.6738	0.00803811108303737	61.4225	2.98559202844499	64.5136	0.591809816713265	685.9455	0.00745817927059216	13.9533	0.683966675827951
DEH1_2015	Z022E0008/LH185	113.3765	0.00502664732441097	18.7348	1.83598315681548	0	574.382423894314	241.7001	0.00811033427991273	61.4652	5.24944329883383	63.7444	0.598350978564772	666.6741	0.00907047555477788	11.7847	0.684049883193624
DEH1_2015	Z022E0009/PHZ51	134.8017	0.00502017659007349	19.6994	1.83579174856078	0	574.382423894314	288.5809	0.00810040820712041	64.4126	4.90715695480788	67.9954	0.597469897483691	679.0595	0.00445416693971775	12.0233	0.684049883193624
DEH1_2015	Z022E0017/LH185	122.1351	0.00500573498575626	18.4696	1.83539687629889	0.0178571	574.382423894314	250.3137	0.00807831566506366	59.7772	2.86437067594751	64.0862	0.595488164026095	666.1981	0.00784529252047208	13.2868	0.684049883193624
DEH1_2015	Z022E0023/PHZ51	124.1026	0.00499764279276207	19.6136	1.8351932268186	0	574.382423894314	265.0081	0.00806593514518088	62.1668	3.48748243778326	63.3394	0.594368375271824	680.0869	0.00647992449602652	13.4341	0.683966675827951
DEH1_2015	Z022E0025/LH82	91.1516	0.00500573498575626	17.9928	1.83539687629889	0.0363636	574.382423894314	223.136	0.00807827789142513	59.0929	3.77911817660736	59.9332	0.595488164026095	668.6265	0.007202130541614	13.6831	0.683966675827951
DEH1_2015	Z022E0036/PHZ51	138.792	0.00501322472927524	20.4098	1.83559625989754	0	574.382423894314	277.1121	0.00808972666155743	62.8935	4.08338620066166	63.9894	0.596518608263436	699.8179	0.00957412813381012	11.6666	0.683966675827951
DEH1_2015	Z022E0042/PHZ51	136.8116	0.00501322472927524	19.7014	1.83559625989754	0.0185185	574.382423894314	246.0473	0.00808972666155743	62.6249	5.47463807591833	64.1807	0.596518608263436	713.0649	0.010808093842197	12.465	0.683966675827951
DEH1_2015	Z022E0046/PHZ51	127.3878	0.00502017659007349	19.0982	1.83579174856078	6.2721535e-09	574.382423894314	270.359	0.00810040820712041	62.9965	5.46066968359648	64.3299	0.597469897483691	696.4397	0.00672313700904007	13.5617	0.684049883193624
DEH1_2015	Z022E0048/PHZ51	126.1516	0.00500573498575626	20.2928	1.83539687629889	0.02	574.382423894314	274.136	0.00807827789142513	63.6634	3.03514945511731	66.9332	0.595488164026095	690.4192	0.00844893246596545	9.4808	0.683966675827951
DEH1_2015	Z022E0050/PHZ51	119.1516	0.00500573498575626	19.7928	1.83539687629889	0	574.382423894314	271.136	0.00807827789142513	63.7385	2.94611613710062	65.9332	0.595488164026095	709.1269	0.00822733884299754	11.6125	0.683966675827951
DEH1_2015	Z022E0053/CG102	113.1026	0.00499764279276207	20.5136	1.8351932268186	0	574.382423894314	226.0081	0.00806593514518088	63.6796	4.41231147377106	65.3394	0.594368375271824	746.5642	0.00659984177674848	9.5517	0.683966675827951
DEH1_2015	Z022E0059/LH185	98.5534	0.00501322472927524	19.8007	1.83559625989754	9.7186557e-09	574.382423894314	240.4445	0.0080897619169534	61.3153	3.14543902231943	64.0613	0.596518608263436	677.9671	0.00678056218572383	13.6396	0.684049883193624
DEH1_2015	Z022E0072/LH82	80.255	0.00502017659007349	19.6158	1.83579174856078	0.0166667	574.382423894314	208.0724	0.00810037463055283	57.3105	5.25005062023913	58.2393	0.597469897483691	717.3173	0.0102875515053166	11.3044	0.683966675827951
DEH1_2015	Z022E0073/LH82	87.5636	0.00499764279276207	19.0903	1.8351932268186	0.0784314	574.382423894314	211.2236	0.00806597627647617	58.4275	5.25806726278906	61.7109	0.594368375271824	725.3758	0.00887354097826829	7.2603	0.684049883193624
DEH1_2015	Z022E0097/LH185	128.255	0.00502017659007349	19.6158	1.83579174856078	0	574.382423894314	266.0724	0.00810037463055283	61.4562	4.40113675991358	64.2393	0.597469897483691	664.3681	0.00779056970504402	15.1837	0.683966675827951
DEH1_2015	Z022E0105/LH185	114.8116	0.00501322472927524	19.4014	1.83559625989754	3.139442e-09	574.382423894314	256.0473	0.00808972666155743	62.8612	5.47463807591833	64.1807	0.596518608263436	654.6802	0.0113370810580015	13.051	0.683966675827951
DEH1_2015	Z022E0108/LH185	118.4066	0.00500573498575626	19.0088	1.83539687629889	4.4522112e-09	574.382423894314	253.3704	0.00807831566506366	60.9837	4.14691201965584	64.4926	0.595488164026095	717.8142	0.00557429568020797	11.8093	0.684049883193624
DEH1_2015	Z022E0114/PHZ51	147.1516	0.00500573498575626	20.9928	1.83539687629889	0	574.382423894314	294.136	0.00807827789142513	63.5749	5.47512393304257	67.9332	0.595488164026095	681.3268	0.0114742258917285	10.5685	0.683966675827951
DEH1_2015	Z022E0121/LH82	138.8017	0.00502017659007349	18.2994	1.83579174856078	0.0377358	574.382423894314	235.5809	0.00810040820712041	61.0023	4.15565744789213	61.9954	0.597469897483691	683.0269	0.00780171694522381	10.3759	0.684049883193624
DEH1_2015	Z022E0123/LH185	81.136	0.00501322472927524	20.7961	1.83559625989754	0.0172414	574.382423894314	234.6209	0.0080897619169534	61.0311	3.88430624400498	64.3861	0.596518608263436	661.6116	0.00611105218462262	12.0115	0.684049883193624
DEH1_2015	Z022E0149/PHZ51	146.792	0.00501322472927524	19.1098	1.83559625989754	0.0185185	574.382423894314	297.1121	0.00808972666155743	61.6793	5.16951980189662	63.9894	0.596518608263436	682.0911	0.00976599578296526	10.2536	0.683966675827951
DEH1_2015	Z022E0160/LH82	107.2062	0.00502664732441097	18.8135	1.83598315681548	0	574.382423894314	219.8399	0.00811030322158772	61.5709	5.47512393304257	62.8478	0.598350978564772	680.4821	0.00629582613548153	8.5501	0.683966675827951
DEH1_2016	(CML442-B/CML343-B-B-B-B-B-B)-B-B-1-1-B-B-B-1-B12-1-B19/LH19	164.5	0.0128070375063241	29.65	1.31900946831755	0	66.5764049075653	285.5	0.0125021503472575	82.5	0.652641237383668	83.5	0.587035344751349	NA	NA	14.6072	0.827027250547906
DEH1_2016	2369/3IIH6	109.5	0.0128070375063241	17.95	1.31900946831755	0.036532	66.5764049075653	238	0.0125021503472575	77	0.652641237383668	77	0.587035344751349	NA	NA	11.9171	0.827027250547906
DEH1_2016	2369/LH123HT	143	0.0128070375063241	23.5	1.31900946831755	0.0851852	66.5764049075653	282.5	0.0125021503472575	78.5	0.652641237383668	80	0.587035344751349	NA	NA	14.1698	0.827027250547906
DEH1_2016	2FACC/3IIH6	125.5	0.0128070375063241	15.05	1.31900946831755	0.0267857	66.5764049075653	255	0.0125021503472575	72.5	0.652641237383668	72	0.587035344751349	NA	NA	10.2305	0.827027250547906
DEH1_2016	4N506/3IIH6	129.5	0.0128070375063241	16.65	1.31900946831755	0.0941283	66.5764049075653	273	0.0125021503472575	77	0.652641237383668	75.5	0.587035344751349	NA	NA	11.8153	0.827027250547906
DEH1_2016	6F629/3IIH6	134	0.0128070375063241	15.3	1.31900946831755	0.0877193	66.5764049075653	274.5	0.0125021503472575	74	0.652641237383668	74	0.587035344751349	NA	NA	12.6977	0.827027250547906
DEH1_2016	78010/3IIH6	100.5	0.0128070375063241	16.6	1.31900946831755	0.0172414	66.5764049075653	224	0.0125021503472575	75	0.652641237383668	75.5	0.587035344751349	NA	NA	10.4543	0.827027250547906
DEH1_2016	A632/3IIH6	129.5	0.0128070375063241	15.1	1.31900946831755	0.2850877	66.5764049075653	263	0.0125021503472575	73.5	0.652641237383668	74	0.587035344751349	NA	NA	9.3781	0.827027250547906
DEH1_2016	A634/3IIH6	109	0.0128070375063241	15.1	1.31900946831755	0.4237288	66.5764049075653	241.5	0.0125021503472575	76	0.652641237383668	76.5	0.587035344751349	NA	NA	7.9687	0.827027250547906
DEH1_2016	A635/3IIH6	121.5	0.0128070375063241	15.05	1.31900946831755	0.4912281	66.5764049075653	255	0.0125021503472575	74	0.652641237383668	74	0.587035344751349	NA	NA	11.6336	0.827027250547906
DEH1_2016	A679/3IIH6	124	0.0128070375063241	15.9	1.31900946831755	0.2277677	66.5764049075653	250	0.0125021503472575	76.5	0.652641237383668	76	0.587035344751349	NA	NA	12.7298	0.827027250547906
DEH1_2016	A680/3IIH6	132	0.0128070375063241	15.35	1.31900946831755	0.0172414	66.5764049075653	254.5	0.0125021503472575	76	0.652641237383668	74.5	0.587035344751349	NA	NA	12.8715	0.827027250547906
DEH1_2016	B104/3IIH6	116.5	0.0128070375063241	15.7	1.31900946831755	0.0611062	66.5764049075653	245.5	0.0125021503472575	76.5	0.652641237383668	76.5	0.587035344751349	NA	NA	13.9913	0.827027250547906
DEH1_2016	B105/3IIH6	94	0.0128070375063241	17.8	1.31900946831755	0.4424242	66.5764049075653	235.5	0.0125021503472575	74.5	0.652641237383668	74.5	0.587035344751349	NA	NA	10.3526	0.827027250547906
DEH1_2016	B109/3IIH6	134.5	0.0128070375063241	16.9	1.31900946831755	0.1508621	66.5764049075653	260	0.0125021503472575	75.5	0.652641237383668	76	0.587035344751349	NA	NA	12.9977	0.827027250547906
DEH1_2016	B110/3IIH6	120.5	0.0128070375063241	17.75	1.31900946831755	0.1491228	66.5764049075653	256	0.0125021503472575	76	0.652641237383668	75.5	0.587035344751349	NA	NA	14.415	0.827027250547906
DEH1_2016	B111/3IIH6	123	0.0128070375063241	16.95	1.31900946831755	0.0529557	66.5764049075653	266.5	0.0125021503472575	75.5	0.652641237383668	75.5	0.587035344751349	NA	NA	13.6438	0.827027250547906
DEH1_2016	B119/3IIH6	126.5	0.0128070375063241	15.9	1.31900946831755	0.0429573	66.5764049075653	241	0.0125021503472575	74.5	0.652641237383668	74	0.587035344751349	NA	NA	14.3833	0.827027250547906
DEH1_2016	B14/3IIH6	141.5	0.0128070375063241	15.3	1.31900946831755	0.0725152	66.5764049075653	263.5	0.0125021503472575	76	0.652641237383668	75.5	0.587035344751349	NA	NA	10.9915	0.827027250547906
DEH1_2016	B14A/H95	131.5	0.0128070375063241	22.5	1.31900946831755	0.1551724	66.5764049075653	254	0.0125021503472575	79	0.652641237383668	79	0.587035344751349	NA	NA	8.8723	0.827027250547906
DEH1_2016	B14A/MO17	135.5	0.0128070375063241	19.35	1.31900946831755	0.1978896	66.5764049075653	268	0.0125021503472575	75	0.652641237383668	78.5	0.587035344751349	NA	NA	11.7579	0.827027250547906
DEH1_2016	B14A/OH43	122	0.0128070375063241	22.2	1.31900946831755	0.0566038	66.5764049075653	260	0.0125021503472575	78	0.652641237383668	78	0.587035344751349	NA	NA	10.2085	0.827027250547906
DEH1_2016	B2/3IIH6	156.5727	0.00640358882479584	24.0526	0.659499370985897	0	33.2887139370842	285.6927	0.00625121329812414	79.3018	0.326329466509372	78.4131	0.29352294903163	NA	NA	4.4525	0.41351358392259
DEH1_2016	B37/H95	118.5	0.0128070375063241	20.8	1.31900946831755	0.0784314	66.5764049075653	261	0.0125021503472575	76.5	0.652641237383668	79	0.587035344751349	NA	NA	10.8922	0.827027250547906
DEH1_2016	B37/MO17	134.5	0.0128070375063241	22.05	1.31900946831755	0.2321429	66.5764049075653	270	0.0125021503472575	75.5	0.652641237383668	76	0.587035344751349	NA	NA	11.7486	0.827027250547906
DEH1_2016	B37/OH43	115	0.0128070375063241	18.1	1.31900946831755	0.0344828	66.5764049075653	256.5	0.0125021503472575	73.5	0.652641237383668	76.5	0.587035344751349	NA	NA	9.3247	0.827027250547906
DEH1_2016	B47/3IIH6	122	0.0128070375063241	15.65	1.31900946831755	0.3513097	66.5764049075653	249.5	0.0125021503472575	76.5	0.652641237383668	76.5	0.587035344751349	NA	NA	11.7215	0.827027250547906
DEH1_2016	B47/LH123HT	125.5	0.0128070375063241	19.6	1.31900946831755	0.0087719	66.5764049075653	266.5	0.0125021503472575	78	0.652641237383668	77	0.587035344751349	NA	NA	12.6682	0.827027250547906
DEH1_2016	B47/LH185	110.5	0.0128070375063241	18.65	1.31900946831755	0.0437084	66.5764049075653	243.5	0.0125021503472575	78.5	0.652641237383668	77.5	0.587035344751349	NA	NA	11.8565	0.827027250547906
DEH1_2016	B47/PHK56	104	0.0128070375063241	19	1.31900946831755	0.0267857	66.5764049075653	245.5	0.0125021503472575	78.5	0.652641237383668	78.5	0.587035344751349	NA	NA	12.3111	0.827027250547906
DEH1_2016	B47/PHK76	120	0.0128070375063241	19.45	1.31900946831755	0.1785714	66.5764049075653	251.5	0.0125021503472575	78.5	0.652641237383668	77.5	0.587035344751349	NA	NA	8.9548	0.827027250547906
DEH1_2016	B47/PHZ51	119.5	0.0255131461456423	18.7	2.62749122690856	0.0559147	132.587838063718	254.5	0.0248944289368306	77.25	1.2998099357714	77.25	1.16902986174572	NA	NA	9.5015	1.65405450109581
DEH1_2016	B73/3IIH6	144	0.0128070375063241	15.35	1.31900946831755	0.01	66.5764049075653	265	0.0125021503472575	77	0.652641237383668	75.5	0.587035344751349	NA	NA	12.0203	0.827027250547906
DEH1_2016	B73/MO17	143	0.0128070375063241	20.95	1.31900946831755	0.0087719	66.5764049075653	273.5	0.0125021503472575	75	0.652641237383668	78	0.587035344751349	NA	NA	13.2783	0.827027250547906
DEH1_2016	B73/PHM49	135.5	0.0128070375063241	21.55	1.31900946831755	0	66.5764049075653	272.5	0.0125021503472575	75.5	0.652641237383668	75.5	0.587035344751349	NA	NA	13.4172	0.827027250547906
DEH1_2016	B73/PHN82	148	0.0128070375063241	20.9	1.31900946831755	0	66.5764049075653	276.5	0.0125021503472575	75.5	0.652641237383668	77.5	0.587035344751349	NA	NA	14.1096	0.827027250547906
DEH1_2016	B73/TX777	167.5	0.0128070375063241	30.35	1.31900946831755	0.0296474	66.5764049075653	290.5	0.0125021503472575	76.5	0.652641237383668	75	0.587035344751349	NA	NA	10.8564	0.827027250547906
DEH1_2016	B84/3IIH6	127.5	0.0128070375063241	15.45	1.31900946831755	0.0168174	66.5764049075653	263.5	0.0125021503472575	75	0.652641237383668	74.5	0.587035344751349	NA	NA	13.1008	0.827027250547906
DEH1_2016	B97/B47	115	0.0128070375063241	17.8	1.31900946831755	0.0169492	66.5764049075653	236	0.0125021503472575	75.5	0.652641237383668	77	0.587035344751349	NA	NA	12.2659	0.827027250547906
DEH1_2016	BSSSC0_001/3IIH6	116.5	0.0128070375063241	16	1.31900946831755	0.2345049	66.5764049075653	240.5	0.0125021503472575	74.5	0.652641237383668	75	0.587035344751349	NA	NA	9.6002	0.827027250547906
DEH1_2016	BSSSC0_002/3IIH6	145	0.0128070375063241	15.1	1.31900946831755	0.1600575	66.5764049075653	250.5	0.0125021503472575	76	0.652641237383668	75.5	0.587035344751349	NA	NA	9.313	0.827027250547906
DEH1_2016	BSSSC0_003/3IIH6	111	0.0128070375063241	15.5	1.31900946831755	0.25	66.5764049075653	234.5	0.0125021503472575	76.5	0.652641237383668	76	0.587035344751349	NA	NA	8.1271	0.827027250547906
DEH1_2016	BSSSC0_005/3IIH6	147.5727	0.00640358882479584	20.8526	0.659499370985897	0.4182209	33.2887139370842	259.6927	0.00625121329812414	75.3018	0.326329466509372	76.4131	0.29352294903163	NA	NA	7.5647	0.41351358392259
DEH1_2016	BSSSC0_008/3IIH6	126.5	0.0128070375063241	15.45	1.31900946831755	0.1156187	66.5764049075653	244	0.0125021503472575	76	0.652641237383668	76.5	0.587035344751349	NA	NA	9.6427	0.827027250547906
DEH1_2016	BSSSC0_009/3IIH6	136.5727	0.00640358882479584	17.3526	0.659499370985897	0	33.2887139370842	273.6927	0.00625121329812414	75.3018	0.326329466509372	76.4131	0.29352294903163	NA	NA	5.9493	0.41351358392259
DEH1_2016	BSSSC0_012/3IIH6	141	0.0128070375063241	18.5	1.31900946831755	0.0181818	66.5764049075653	251	0.0125021503472575	77.5	0.652641237383668	77	0.587035344751349	NA	NA	12.8509	0.827027250547906
DEH1_2016	BSSSC0_015/3IIH6	121	0.0128070375063241	18.25	1.31900946831755	0.0426651	66.5764049075653	254	0.0125021503472575	74.5	0.652641237383668	74	0.587035344751349	NA	NA	10.4802	0.827027250547906
DEH1_2016	BSSSC0_017/3IIH6	109.5	0.0128070375063241	14.95	1.31900946831755	0.5086207	66.5764049075653	230	0.0125021503472575	74.5	0.652641237383668	75.5	0.587035344751349	NA	NA	8.9804	0.827027250547906
DEH1_2016	BSSSC0_020/3IIH6	122	0.0128070375063241	15.15	1.31900946831755	0.1886792	66.5764049075653	242.5	0.0125021503472575	74.5	0.652641237383668	75	0.587035344751349	NA	NA	7.7875	0.827027250547906
DEH1_2016	BSSSC0_024/3IIH6	127.5	0.0128070375063241	15.15	1.31900946831755	0.0350391	66.5764049075653	250.5	0.0125021503472575	74	0.652641237383668	73.5	0.587035344751349	NA	NA	6.3215	0.827027250547906
DEH1_2016	BSSSC0_026/3IIH6	114.5	0.0128070375063241	15.15	1.31900946831755	0.2777778	66.5764049075653	254.5	0.0125021503472575	74.5	0.652641237383668	75	0.587035344751349	NA	NA	9.4971	0.827027250547906
DEH1_2016	BSSSC0_029/3IIH6	98.5	0.0128070375063241	17	1.31900946831755	0.0526316	66.5764049075653	240	0.0125021503472575	76	0.652641237383668	76.5	0.587035344751349	NA	NA	12.2247	0.827027250547906
DEH1_2016	BSSSC0_033/3IIH6	126	0.0128070375063241	17.25	1.31900946831755	0.4519231	66.5764049075653	248	0.0125021503472575	75.5	0.652641237383668	76.5	0.587035344751349	NA	NA	7.3136	0.827027250547906
DEH1_2016	BSSSC0_038/3IIH6	110.5	0.0128070375063241	15.35	1.31900946831755	0.1491228	66.5764049075653	225	0.0125021503472575	77	0.652641237383668	77.5	0.587035344751349	NA	NA	8.2435	0.827027250547906
DEH1_2016	BSSSC0_054/3IIH6	124.4273	0.00640329375250313	18.1474	0.659488909488181	0.03416	33.2881121920235	239.3073	0.0062508554301134	76.6982	0.326323731812819	73.5869	0.29351752498305	NA	NA	4.4732	0.41351358392259
DEH1_2016	BSSSC0_057/3IIH6	146	0.0128070375063241	16.3	1.31900946831755	0.1698113	66.5764049075653	268.5	0.0125021503472575	76	0.652641237383668	75.5	0.587035344751349	NA	NA	10.6051	0.827027250547906
DEH1_2016	BSSSC0_060/3IIH6	122.5	0.0128070375063241	16.65	1.31900946831755	0.3312519	66.5764049075653	257.5	0.0125021503472575	73	0.652641237383668	73	0.587035344751349	NA	NA	11.0574	0.827027250547906
DEH1_2016	CG102/3IIH6	NA	NA	19.2474	0.659488909488181	0.03416	33.2881121920235	NA	NA	74.6982	0.326323731812819	75.5869	0.29351752498305	NA	NA	12.2438	0.41351358392259
DEH1_2016	CG102/LH82	106	0.0128070375063241	16.5	1.31900946831755	0	66.5764049075653	216	0.0125021503472575	70.5	0.652641237383668	72	0.587035344751349	NA	NA	11.972	0.827027250547906
DEH1_2016	CG106/3IIH6	103	0.0128070375063241	15	1.31900946831755	0.0666667	66.5764049075653	247	0.0125021503472575	70.5	0.652641237383668	70.5	0.587035344751349	NA	NA	11.5075	0.827027250547906
DEH1_2016	CG108/CGR03	105	0.0128070375063241	15.25	1.31900946831755	0.0344828	66.5764049075653	227	0.0125021503472575	71	0.652641237383668	71.5	0.587035344751349	NA	NA	10.1287	0.827027250547906
DEH1_2016	CG119/CG108	103.5	0.0128070375063241	19.65	1.31900946831755	0.3617497	66.5764049075653	217.5	0.0125021503472575	69.5	0.652641237383668	70	0.587035344751349	NA	NA	12.4696	0.827027250547906
DEH1_2016	CG44/CGR01	106	0.0128070375063241	14.9	1.31900946831755	0.3076923	66.5764049075653	225	0.0125021503472575	72	0.652641237383668	72.5	0.587035344751349	NA	NA	6.4415	0.827027250547906
DEH1_2016	CG60/LH162	80.5	0.0128070375063241	15.4	1.31900946831755	0.5609195	66.5764049075653	204	0.0125021503472575	69	0.652641237383668	69	0.587035344751349	NA	NA	6.3518	0.827027250547906
DEH1_2016	CGR01/LH82	102	0.0128070375063241	18.6	1.31900946831755	0.2305528	66.5764049075653	223.5	0.0125021503472575	72.5	0.652641237383668	71.5	0.587035344751349	NA	NA	10.0307	0.827027250547906
DEH1_2016	CI540/3IIH6	147.5	0.0128070375063241	15.95	1.31900946831755	0.0363636	66.5764049075653	271	0.0125021503472575	75.5	0.652641237383668	75.5	0.587035344751349	NA	NA	11.8371	0.827027250547906
DEH1_2016	CO258/3IIH6	126.5	0.0128070375063241	15.3	1.31900946831755	0.3268519	66.5764049075653	252	0.0125021503472575	75	0.652641237383668	76.5	0.587035344751349	NA	NA	10.4115	0.827027250547906
DEH1_2016	DKFBHJ/3IIH6	120.4273	0.00640329375250313	14.7474	0.659488909488181	0.1031255	33.2881121920235	252.3073	0.0062508554301134	73.6982	0.326323731812819	73.5869	0.29351752498305	NA	NA	9.0968	0.41351358392259
DEH1_2016	F42/H95	135	0.0128070375063241	22.4	1.31900946831755	0	66.5764049075653	254.5	0.0125021503472575	76	0.652641237383668	77.5	0.587035344751349	NA	NA	12.612	0.827027250547906
DEH1_2016	F42/MO17	115.5	0.0128070375063241	19.95	1.31900946831755	0.1355932	66.5764049075653	262	0.0125021503472575	76.5	0.652641237383668	77.5	0.587035344751349	NA	NA	12.9441	0.827027250547906
DEH1_2016	F42/OH43	128.5	0.0128070375063241	22.9	1.31900946831755	0.0517241	66.5764049075653	272.5	0.0125021503472575	77	0.652641237383668	77	0.587035344751349	NA	NA	13.0886	0.827027250547906
DEH1_2016	FBLA/3IIH6	111.5	0.0128070375063241	14.8	1.31900946831755	0.0441729	66.5764049075653	261.5	0.0125021503472575	72.5	0.652641237383668	73	0.587035344751349	NA	NA	10.0748	0.827027250547906
DEH1_2016	FE/3IIH6	101.5	0.0128070375063241	15.25	1.31900946831755	0.2407407	66.5764049075653	240.5	0.0125021503472575	76.5	0.652641237383668	77.5	0.587035344751349	NA	NA	9.1578	0.827027250547906
DEH1_2016	FR19/3IIH6	136.5	0.0128070375063241	15.15	1.31900946831755	0.3802632	66.5764049075653	263	0.0125021503472575	75	0.652641237383668	73.5	0.587035344751349	NA	NA	5.4956	0.827027250547906
DEH1_2016	H122W/3IIH6	154.5	0.0128070375063241	18.15	1.31900946831755	0.5369458	66.5764049075653	275.5	0.0125021503472575	76.5	0.652641237383668	76.5	0.587035344751349	NA	NA	14.2386	0.827027250547906
DEH1_2016	H84/3IIH6	106	0.0128070375063241	19.95	1.31900946831755	0.025	66.5764049075653	236.5	0.0125021503472575	76	0.652641237383668	75	0.587035344751349	NA	NA	13.9289	0.827027250547906
DEH1_2016	H91/3IIH6	143.5	0.0128070375063241	15.35	1.31900946831755	0.4162129	66.5764049075653	266.5	0.0125021503472575	75.5	0.652641237383668	76	0.587035344751349	NA	NA	8.4799	0.827027250547906
DEH1_2016	I159/3IIH6	132.5	0.0128070375063241	15.6	1.31900946831755	0.1527778	66.5764049075653	250	0.0125021503472575	74.5	0.652641237383668	74.5	0.587035344751349	NA	NA	8.9828	0.827027250547906
DEH1_2016	ICI441/LH123HT	124	0.0128070375063241	22.7	1.31900946831755	0	66.5764049075653	277	0.0125021503472575	74	0.652641237383668	76.5	0.587035344751349	NA	NA	14.1105	0.827027250547906
DEH1_2016	ICI441/LH185	118.5	0.0128070375063241	20.8	1.31900946831755	0.2272727	66.5764049075653	262	0.0125021503472575	78.5	0.652641237383668	78.5	0.587035344751349	NA	NA	15.0218	0.827027250547906
DEH1_2016	ICI441/LH38	90	0.0128070375063241	19.3	1.31900946831755	0	66.5764049075653	232	0.0125021503472575	77	0.652641237383668	78	0.587035344751349	NA	NA	13.1264	0.827027250547906
DEH1_2016	ICI441/LH51	110	0.0128070375063241	20.8	1.31900946831755	0.0187063	66.5764049075653	251	0.0125021503472575	77.5	0.652641237383668	77.5	0.587035344751349	NA	NA	12.6467	0.827027250547906
DEH1_2016	ICI441/LH82	80	0.0128070375063241	18.7	1.31900946831755	0	66.5764049075653	214	0.0125021503472575	78	0.652641237383668	79	0.587035344751349	NA	NA	11.5285	0.827027250547906
DEH1_2016	ICI441/PHG29	103.5	0.0128070375063241	18.75	1.31900946831755	0.0090909	66.5764049075653	232	0.0125021503472575	76.5	0.652641237383668	77.5	0.587035344751349	NA	NA	12.0154	0.827027250547906
DEH1_2016	ICI441/PHG47	110.5	0.0128070375063241	16.45	1.31900946831755	0.25	66.5764049075653	242	0.0125021503472575	76	0.652641237383668	75.5	0.587035344751349	NA	NA	11.348	0.827027250547906
DEH1_2016	ICI441/PHG83	110.5	0.0128070375063241	16.4	1.31900946831755	0.0263158	66.5764049075653	239	0.0125021503472575	78.5	0.652641237383668	79.5	0.587035344751349	NA	NA	7.0939	0.827027250547906
DEH1_2016	ICI441/PHK56	100.5	0.0128070375063241	15.95	1.31900946831755	0	66.5764049075653	231	0.0125021503472575	76.5	0.652641237383668	78.5	0.587035344751349	NA	NA	12.2737	0.827027250547906
DEH1_2016	ICI441/PHK76	106.5	0.0128070375063241	19.55	1.31900946831755	0.0487941	66.5764049075653	243.5	0.0125021503472575	77.5	0.652641237383668	79	0.587035344751349	NA	NA	11.2452	0.827027250547906
DEH1_2016	ICI441/PHN82	105.5	0.0128070375063241	20.85	1.31900946831755	0	66.5764049075653	235.5	0.0125021503472575	76	0.652641237383668	78	0.587035344751349	NA	NA	13.0705	0.827027250547906
DEH1_2016	ICI441/PHW30	128	0.0128070375063241	18.55	1.31900946831755	0.0294118	66.5764049075653	268.5	0.0125021503472575	77.5	0.652641237383668	78	0.587035344751349	NA	NA	15.9015	0.827027250547906
DEH1_2016	ICI441/PHZ51	124.5	0.0128070375063241	19.25	1.31900946831755	0	66.5764049075653	266.5	0.0125021503472575	78	0.652641237383668	79	0.587035344751349	NA	NA	10.9373	0.827027250547906
DEH1_2016	ICI441/Q381	125.5	0.0128070375063241	19.15	1.31900946831755	0.0350877	66.5764049075653	256	0.0125021503472575	78.5	0.652641237383668	78.5	0.587035344751349	NA	NA	10.7268	0.827027250547906
DEH1_2016	ILL.HY/3IIH6	134.5727	0.00640358882479584	17.9	1.31900946831755	0.1726303	66.5764049075653	268.6927	0.00625121329812414	75	0.652641237383668	77	0.587035344751349	NA	NA	5.4645	0.827027250547906
DEH1_2016	LH123HT/3IIH6	145	0.0128070375063241	19.35	1.31900946831755	0.0588679	66.5764049075653	285.5	0.0125021503472575	76.5	0.652641237383668	78	0.587035344751349	NA	NA	11.2399	0.827027250547906
DEH1_2016	LH145/3IIH6	99.5	0.0128070375063241	15.05	1.31900946831755	0.0810114	66.5764049075653	242.5	0.0125021503472575	75	0.652641237383668	76	0.587035344751349	NA	NA	10.6664	0.827027250547906
DEH1_2016	LH149/3IIH6	122.5	0.0128070375063241	15.45	1.31900946831755	0.1071429	66.5764049075653	248	0.0125021503472575	74	0.652641237383668	74	0.587035344751349	NA	NA	12.3468	0.827027250547906
DEH1_2016	LH195/3IIH6	106	0.0128070375063241	19.35	1.31900946831755	0.0350877	66.5764049075653	226.5	0.0125021503472575	75.5	0.652641237383668	76	0.587035344751349	NA	NA	10.4527	0.827027250547906
DEH1_2016	LH195/LH123HT	128.5	0.0128070375063241	24.15	1.31900946831755	0.0089286	66.5764049075653	276.5	0.0125021503472575	78	0.652641237383668	79.5	0.587035344751349	NA	NA	15.9041	0.827027250547906
DEH1_2016	LH195/LH185	116.5	0.0128070375063241	21.35	1.31900946831755	0	66.5764049075653	242.5	0.0125021503472575	79	0.652641237383668	79.5	0.587035344751349	NA	NA	12.2599	0.827027250547906
DEH1_2016	LH195/PHG29	127	0.0128070375063241	20.95	1.31900946831755	0.1589286	66.5764049075653	253	0.0125021503472575	79.5	0.652641237383668	79.5	0.587035344751349	NA	NA	11.6318	0.827027250547906
DEH1_2016	LH195/PHG47	106.5	0.0128070375063241	16	1.31900946831755	0.0591808	66.5764049075653	237.5	0.0125021503472575	78	0.652641237383668	78	0.587035344751349	NA	NA	11.4054	0.827027250547906
DEH1_2016	LH195/PHG83	114.5	0.0128070375063241	21.65	1.31900946831755	0	66.5764049075653	223.5	0.0125021503472575	78	0.652641237383668	79	0.587035344751349	NA	NA	8.15	0.827027250547906
DEH1_2016	LH195/PHK56	97.5	0.0128070375063241	20.3	1.31900946831755	0.0185185	66.5764049075653	230	0.0125021503472575	78.5	0.652641237383668	78.5	0.587035344751349	NA	NA	12.6036	0.827027250547906
DEH1_2016	LH195/PHK76	98.5	0.0128070375063241	22.4	1.31900946831755	0.0693247	66.5764049075653	223.5	0.0125021503472575	78	0.652641237383668	78.5	0.587035344751349	NA	NA	10.5475	0.827027250547906
DEH1_2016	LH195/PHN82	99.5	0.0128070375063241	22.05	1.31900946831755	0.0277778	66.5764049075653	224.5	0.0125021503472575	77.5	0.652641237383668	78	0.587035344751349	NA	NA	11.1666	0.827027250547906
DEH1_2016	LH195/PHW30	124	0.0128070375063241	21.55	1.31900946831755	0.0090909	66.5764049075653	263	0.0125021503472575	79	0.652641237383668	78.5	0.587035344751349	NA	NA	13.4095	0.827027250547906
DEH1_2016	LH195/PHZ51	141.5	0.0128070375063241	20.6	1.31900946831755	0.0166667	66.5764049075653	276.5	0.0125021503472575	78.5	0.652641237383668	77	0.587035344751349	NA	NA	13.4071	0.827027250547906
DEH1_2016	LH195/Q381	122.5	0.0128070375063241	20.45	1.31900946831755	0	66.5764049075653	243.5	0.0125021503472575	77.5	0.652641237383668	77	0.587035344751349	NA	NA	11.4365	0.827027250547906
DEH1_2016	LH198/3IIH6	104.5	0.0128070375063241	16.8	1.31900946831755	0.0170953	66.5764049075653	230.5	0.0125021503472575	76.5	0.652641237383668	76.5	0.587035344751349	NA	NA	13.8501	0.827027250547906
DEH1_2016	LH198/LH123HT	129.5	0.0128070375063241	23.35	1.31900946831755	0.2037037	66.5764049075653	272.5	0.0125021503472575	77.5	0.652641237383668	77.5	0.587035344751349	NA	NA	13.2342	0.827027250547906
DEH1_2016	LH198/LH185	120.5727	0.00640358882479584	19.7526	0.659499370985897	0	33.2887139370842	260.6927	0.00625121329812414	77.3018	0.326329466509372	77.4131	0.29352294903163	NA	NA	14.3281	0.41351358392259
DEH1_2016	LH198/LH38	107.5	0.0128070375063241	20.1	1.31900946831755	0.0175439	66.5764049075653	237.5	0.0125021503472575	78.5	0.652641237383668	78	0.587035344751349	NA	NA	12.6153	0.827027250547906
DEH1_2016	LH198/LH51	128	0.0128070375063241	19.3	1.31900946831755	0	66.5764049075653	255.5	0.0125021503472575	78	0.652641237383668	77	0.587035344751349	NA	NA	14.4001	0.827027250547906
DEH1_2016	LH198/PHG29	111	0.0128070375063241	18.9	1.31900946831755	0.0625	66.5764049075653	252.5	0.0125021503472575	77.5	0.652641237383668	77.5	0.587035344751349	NA	NA	12.3944	0.827027250547906
DEH1_2016	LH198/PHG47	111.5	0.0128070375063241	16.5	1.31900946831755	0.0181818	66.5764049075653	234	0.0125021503472575	77	0.652641237383668	77	0.587035344751349	NA	NA	12.0484	0.827027250547906
DEH1_2016	LH198/PHG83	105	0.0128070375063241	15.4	1.31900946831755	0.0532635	66.5764049075653	219	0.0125021503472575	77.5	0.652641237383668	78	0.587035344751349	NA	NA	6.6073	0.827027250547906
DEH1_2016	LH198/PHK56	118	0.0128070375063241	21.1	1.31900946831755	0.0518754	66.5764049075653	257.5	0.0125021503472575	77.5	0.652641237383668	77	0.587035344751349	NA	NA	15.0473	0.827027250547906
DEH1_2016	LH198/PHK76	117.5	0.0128070375063241	19.9	1.31900946831755	0.1271186	66.5764049075653	246	0.0125021503472575	77.5	0.652641237383668	77	0.587035344751349	NA	NA	10.2318	0.827027250547906
DEH1_2016	LH198/PHN82	124.5	0.0128070375063241	19.95	1.31900946831755	0	66.5764049075653	246	0.0125021503472575	78	0.652641237383668	77.5	0.587035344751349	NA	NA	12.5535	0.827027250547906
DEH1_2016	LH198/PHW30	130.5	0.0128070375063241	20.1	1.31900946831755	0	66.5764049075653	262	0.0125021503472575	78.5	0.652641237383668	78.5	0.587035344751349	NA	NA	11.9567	0.827027250547906
DEH1_2016	LH198/PHZ51	132.25	0.0255131461456423	19.75	2.62749122690856	0.018591	132.587838063718	267.75	0.0248944289368306	77.5	1.2998099357714	78	1.16902986174572	NA	NA	11.6284	1.65405450109581
DEH1_2016	LH198/Q381	127	0.0128070375063241	20.25	1.31900946831755	0.0087719	66.5764049075653	258	0.0125021503472575	77.5	0.652641237383668	78	0.587035344751349	NA	NA	12.8376	0.827027250547906
DEH1_2016	LH205/3IIH6	116.5	0.0128070375063241	15.1	1.31900946831755	0.0508475	66.5764049075653	241.5	0.0125021503472575	73	0.652641237383668	73	0.587035344751349	NA	NA	12.9067	0.827027250547906
DEH1_2016	LH209/3IIH6	114	0.0128070375063241	15.05	1.31900946831755	0.2142857	66.5764049075653	244.5	0.0125021503472575	73.5	0.652641237383668	74.5	0.587035344751349	NA	NA	10.771	0.827027250547906
DEH1_2016	LH212HT/LH195	130	0.0128070375063241	22.65	1.31900946831755	0.0590395	66.5764049075653	265	0.0125021503472575	76	0.652641237383668	76.5	0.587035344751349	NA	NA	14.959	0.827027250547906
DEH1_2016	LH216/LH195	127.5	0.0128070375063241	24.7	1.31900946831755	0.4299451	66.5764049075653	258	0.0125021503472575	78	0.652641237383668	75.5	0.587035344751349	NA	NA	14.825	0.827027250547906
DEH1_2016	LH220HT/3IIH6	90	0.0128070375063241	15	1.31900946831755	0.5	66.5764049075653	228	0.0125021503472575	76.5	0.652641237383668	76.5	0.587035344751349	NA	NA	10.5852	0.827027250547906
DEH1_2016	LH222/3IIH6	108	0.0128070375063241	15.4	1.31900946831755	0.064441	66.5764049075653	231.5	0.0125021503472575	73.5	0.652641237383668	74.5	0.587035344751349	NA	NA	9.2192	0.827027250547906
DEH1_2016	LH38/B47	83.5	0.0128070375063241	18.75	1.31900946831755	0	66.5764049075653	209.5	0.0125021503472575	75	0.652641237383668	74.5	0.587035344751349	NA	NA	10.0672	0.827027250547906
DEH1_2016	LH38/LH195	137	0.0128070375063241	21.25	1.31900946831755	0.0508475	66.5764049075653	260.5	0.0125021503472575	77.5	0.652641237383668	78.5	0.587035344751349	NA	NA	12.3737	0.827027250547906
DEH1_2016	LH51/B47	86.5	0.0128070375063241	17.5	1.31900946831755	0.0480769	66.5764049075653	224.5	0.0125021503472575	79.5	0.652641237383668	77.5	0.587035344751349	NA	NA	12.5234	0.827027250547906
DEH1_2016	LH51/LH195	129	0.0128070375063241	22.6	1.31900946831755	0.0083333	66.5764049075653	255.5	0.0125021503472575	77.5	0.652641237383668	77.5	0.587035344751349	NA	NA	14.4333	0.827027250547906
DEH1_2016	LH74/PHN82	126	0.0128070375063241	19.75	1.31900946831755	0.0357143	66.5764049075653	246	0.0125021503472575	78	0.652641237383668	77.5	0.587035344751349	NA	NA	11.1866	0.827027250547906
DEH1_2016	LH82/B47	104.4273	0.00640329375250313	15.5474	0.659488909488181	0.4956985	33.2881121920235	225.3073	0.0062508554301134	79.6982	0.326323731812819	77.5869	0.29351752498305	NA	NA	7.4857	0.41351358392259
DEH1_2016	LH82/LH195	92.25	0.0255131461456423	21.675	2.62749122690856	0.0181878	132.587838063718	212	0.0248944289368306	77.25	1.2998099357714	77.25	1.16902986174572	NA	NA	9.2343	1.65405450109581
DEH1_2016	LH82/LH198	120.5	0.0128070375063241	19.25	1.31900946831755	0.0267857	66.5764049075653	236	0.0125021503472575	76.5	0.652641237383668	76.5	0.587035344751349	NA	NA	11.2495	0.827027250547906
DEH1_2016	MS222/3IIH6	129	0.0128070375063241	17.3	1.31900946831755	0.063474	66.5764049075653	253	0.0125021503472575	76	0.652641237383668	75.5	0.587035344751349	729.834	0.0107505588228911	11.9405	0.827027250547906
DEH1_2016	N192/3IIH6	110	0.0128070375063241	15.15	1.31900946831755	0	66.5764049075653	247	0.0125021503472575	75	0.652641237383668	74.5	0.587035344751349	715.0314	0.0107505588228911	10.2441	0.827027250547906
DEH1_2016	N209/3IIH6	126.5	0.0128070375063241	15.2	1.31900946831755	0.1104668	66.5764049075653	245.5	0.0125021503472575	74.5	0.652641237383668	74.5	0.587035344751349	691.2185	0.0107505588228911	9.781	0.827027250547906
DEH1_2016	N217/3IIH6	124.5	0.0128070375063241	19.9	1.31900946831755	0.025	66.5764049075653	254	0.0125021503472575	77	0.652641237383668	77	0.587035344751349	709.8827	0.0107505588228911	12.3727	0.827027250547906
DEH1_2016	N218/3IIH6	119.5	0.0128070375063241	15.35	1.31900946831755	0.2883573	66.5764049075653	243	0.0125021503472575	75.5	0.652641237383668	75.5	0.587035344751349	720.8237	0.0107505588228911	11.4876	0.827027250547906
DEH1_2016	N28HT/3IIH6	129.5	0.0128070375063241	18.75	1.31900946831755	0.0619048	66.5764049075653	264.5	0.0125021503472575	75	0.652641237383668	75	0.587035344751349	709.8827	0.0107505588228911	8.3589	0.827027250547906
DEH1_2016	N501/3IIH6	107	0.0128070375063241	15.75	1.31900946831755	0.0844633	66.5764049075653	248	0.0125021503472575	75.5	0.652641237383668	76	0.587035344751349	718.893	0.0107505588228911	12.0102	0.827027250547906
DEH1_2016	OS420/3IIH6	110.5	0.0128070375063241	16.9	1.31900946831755	0.1692593	66.5764049075653	252.5	0.0125021503472575	73.5	0.652641237383668	74	0.587035344751349	735.6264	0.0107505588228911	7.8104	0.827027250547906
DEH1_2016	PB80/PHZ51	145.5	0.0128070375063241	20.05	1.31900946831755	0.034634	66.5764049075653	276.5	0.0125021503472575	79	0.652641237383668	78.5	0.587035344751349	738.2007	0.0107505588228911	11.6205	0.827027250547906
DEH1_2016	PHB09/3IIH6	107.5	0.0128070375063241	17.15	1.31900946831755	0.14116	66.5764049075653	228.5	0.0125021503472575	74	0.652641237383668	74.5	0.587035344751349	703.4467	0.0107505588228911	9.6523	0.827027250547906
DEH1_2016	PHBB3/3IIH6	107	0.0128070375063241	16.35	1.31900946831755	0.1134259	66.5764049075653	235.5	0.0125021503472575	74.5	0.652641237383668	75.5	0.587035344751349	707.3083	0.0107505588228911	12.2696	0.827027250547906
DEH1_2016	PHBW8/3IIH6	135.5727	0.00640358882479584	15.9526	0.659499370985897	0	33.2887139370842	262.6927	0.00625121329812414	76.3018	0.326329466509372	75.4131	0.29352294903163	733.3285	0.00537550511078799	12.7067	0.41351358392259
DEH1_2016	PHG29/B47	107	0.0128070375063241	16.05	1.31900946831755	0.11341	66.5764049075653	228.5	0.0125021503472575	76.5	0.652641237383668	77	0.587035344751349	NA	NA	11.6123	0.827027250547906
DEH1_2016	PHG29/PHG47	120	0.0128070375063241	15.15	1.31900946831755	0.0258621	66.5764049075653	247.5	0.0125021503472575	74	0.652641237383668	76	0.587035344751349	740.7751	0.0107505588228911	9.6134	0.827027250547906
DEH1_2016	PHG39/PHN82	130.5	0.0128070375063241	21.1	1.31900946831755	0.4272414	66.5764049075653	264	0.0125021503472575	75	0.652641237383668	76	0.587035344751349	740.1315	0.0107505588228911	12.485	0.827027250547906
DEH1_2016	PHG39/TX205	130.5	0.0128070375063241	24.5	1.31900946831755	0.0089286	66.5764049075653	283.5	0.0125021503472575	79	0.652641237383668	79	0.587035344751349	653.8901	0.0107505588228911	13.6691	0.827027250547906
DEH1_2016	PHG47/B47	98	0.0128070375063241	15.5	1.31900946831755	0.0169492	66.5764049075653	232	0.0125021503472575	77	0.652641237383668	77	0.587035344751349	NA	NA	9.8483	0.827027250547906
DEH1_2016	PHG80/3IIH6	106	0.0128070375063241	15.55	1.31900946831755	0	66.5764049075653	252.5	0.0125021503472575	75.5	0.652641237383668	75.5	0.587035344751349	661.6132	0.0107505588228911	12.9974	0.827027250547906
DEH1_2016	PHG80/PHZ51	127	0.0128070375063241	19.55	1.31900946831755	0.0711207	66.5764049075653	260.5	0.0125021503472575	74.5	0.652641237383668	77	0.587035344751349	681.5646	0.0107505588228911	14.39	0.827027250547906
DEH1_2016	PHG83/B47	126	0.0128070375063241	19	1.31900946831755	0.0275875	66.5764049075653	243.5	0.0125021503472575	79.5	0.652641237383668	78.5	0.587035344751349	NA	NA	11.4362	0.827027250547906
DEH1_2016	PHN11_OH43_0001/B47	112.5	0.0128070375063241	15.75	1.31900946831755	0.0283333	66.5764049075653	268.5	0.0125021503472575	77	0.652641237383668	78	0.587035344751349	677.0594	0.0107505588228911	11.294	0.827027250547906
DEH1_2016	PHN11_PHG47_0251/B47	118.5	0.0128070375063241	15.5	1.31900946831755	0.0625	66.5764049075653	252.5	0.0125021503472575	75.5	0.652641237383668	78	0.587035344751349	698.298	0.0107505588228911	9.5288	0.827027250547906
DEH1_2016	PHN11_PHW65_0323/LH195	120	0.0128070375063241	23.4	1.31900946831755	0.0175493	66.5764049075653	250.5	0.0125021503472575	76	0.652641237383668	78	0.587035344751349	695.7236	0.0107505588228911	11.1175	0.827027250547906
DEH1_2016	PHN66/LH123HT	130.5	0.0128070375063241	22.1	1.31900946831755	0.0092593	66.5764049075653	264.5	0.0125021503472575	78	0.652641237383668	76	0.587035344751349	707.3083	0.0107505588228911	14.0894	0.827027250547906
DEH1_2016	PHN66/LH185	108	0.0128070375063241	19.45	1.31900946831755	0	66.5764049075653	240	0.0125021503472575	76	0.652641237383668	75	0.587035344751349	707.3083	0.0107505588228911	13.329	0.827027250547906
DEH1_2016	PHN66/LH38	124.5	0.0128070375063241	17.25	1.31900946831755	0.051578	66.5764049075653	244	0.0125021503472575	76	0.652641237383668	74.5	0.587035344751349	696.3672	0.0107505588228911	11.3846	0.827027250547906
DEH1_2016	PHN66/LH51	108.5	0.0128070375063241	18.25	1.31900946831755	0.0270833	66.5764049075653	242.5	0.0125021503472575	76.5	0.652641237383668	76.5	0.587035344751349	689.2877	0.0107505588228911	11.203	0.827027250547906
DEH1_2016	PHN66/LH82	119.5	0.0128070375063241	16.85	1.31900946831755	0.0259259	66.5764049075653	228	0.0125021503472575	75	0.652641237383668	74.5	0.587035344751349	721.4673	0.0107505588228911	12.7112	0.827027250547906
DEH1_2016	PHN66/PHG29	133.5	0.0128070375063241	15.25	1.31900946831755	0.0344828	66.5764049075653	267.5	0.0125021503472575	77.5	0.652641237383668	78.5	0.587035344751349	721.4673	0.0107505588228911	12.2666	0.827027250547906
DEH1_2016	PHN66/PHG47	121.5	0.0128070375063241	15.2	1.31900946831755	0.2269481	66.5764049075653	239	0.0125021503472575	77	0.652641237383668	77.5	0.587035344751349	727.9032	0.0107505588228911	10.0141	0.827027250547906
DEH1_2016	PHN66/PHG83	129	0.0128070375063241	19.1	1.31900946831755	0	66.5764049075653	253.5	0.0125021503472575	79.5	0.652641237383668	79	0.587035344751349	720.8237	0.0107505588228911	12.0027	0.827027250547906
DEH1_2016	PHN66/PHK56	139.5	0.0128070375063241	15.85	1.31900946831755	0	66.5764049075653	261.5	0.0125021503472575	79.5	0.652641237383668	78	0.587035344751349	688.0005	0.0107505588228911	12.7652	0.827027250547906
DEH1_2016	PHN66/PHK76	119.5	0.0128070375063241	20.1	1.31900946831755	0.0090909	66.5764049075653	240	0.0125021503472575	76	0.652641237383668	75.5	0.587035344751349	751.7162	0.0107505588228911	10.5826	0.827027250547906
DEH1_2016	PHN66/PHN82	120	0.0128070375063241	17.3	1.31900946831755	0.0441729	66.5764049075653	257.5	0.0125021503472575	77	0.652641237383668	77.5	0.587035344751349	722.1109	0.0107505588228911	14.1173	0.827027250547906
DEH1_2016	PHN66/PHW30	124.5	0.0128070375063241	15.75	1.31900946831755	0	66.5764049075653	268.5	0.0125021503472575	78	0.652641237383668	78.5	0.587035344751349	705.3775	0.0107505588228911	12.4612	0.827027250547906
DEH1_2016	PHN66/PHZ51	140.5	0.0128070375063241	16.95	1.31900946831755	0.044697	66.5764049075653	278.5	0.0125021503472575	79	0.652641237383668	79	0.587035344751349	742.0623	0.0107505588228911	11.0492	0.827027250547906
DEH1_2016	PHN66/Q381	113.5	0.0128070375063241	15.35	1.31900946831755	0.009434	66.5764049075653	246.5	0.0125021503472575	79.5	0.652641237383668	78.5	0.587035344751349	714.3878	0.0107505588228911	10.5711	0.827027250547906
DEH1_2016	PHN82/B47	110.5	0.0128070375063241	20.1	1.31900946831755	0.0179085	66.5764049075653	238.5	0.0125021503472575	77.5	0.652641237383668	78	0.587035344751349	NA	NA	12.8187	0.827027250547906
DEH1_2016	PHP02/B47	114	0.0128070375063241	17.85	1.31900946831755	0.3125423	66.5764049075653	241.5	0.0125021503472575	78	0.652641237383668	78.5	0.587035344751349	706.6647	0.0107505588228911	11.6842	0.827027250547906
DEH1_2016	PHP85/3IIH6	116	0.0128070375063241	18.25	1.31900946831755	0.1339286	66.5764049075653	243	0.0125021503472575	75	0.652641237383668	75	0.587035344751349	710.5262	0.0107505588228911	13.9249	0.827027250547906
DEH1_2016	PHT69/3IIH6	127	0.0128070375063241	16.75	1.31900946831755	0.0862069	66.5764049075653	247.5	0.0125021503472575	75	0.652641237383668	74.5	0.587035344751349	715.0314	0.0107505588228911	12.5974	0.827027250547906
DEH1_2016	PHV37/3IIH6	94	0.0128070375063241	15	1.31900946831755	0.1497494	66.5764049075653	234	0.0125021503472575	72.5	0.652641237383668	73	0.587035344751349	691.8621	0.0107505588228911	11.0446	0.827027250547906
DEH1_2016	PHW30/B47	113.5	0.0128070375063241	19.25	1.31900946831755	0.0169492	66.5764049075653	244	0.0125021503472575	77.5	0.652641237383668	76	0.587035344751349	NA	NA	10.8916	0.827027250547906
DEH1_2016	PHW52/LH123HT	134	0.0128070375063241	22.95	1.31900946831755	0	66.5764049075653	270	0.0125021503472575	77	0.652641237383668	76.5	0.587035344751349	693.1492	0.0107505588228911	12.5073	0.827027250547906
DEH1_2016	PHW52/LH185	102	0.0128070375063241	23	1.31900946831755	0	66.5764049075653	235.5	0.0125021503472575	77.5	0.652641237383668	78	0.587035344751349	685.4261	0.0107505588228911	13.3476	0.827027250547906
DEH1_2016	PHW52/LH38	86.5	0.0128070375063241	22.95	1.31900946831755	0	66.5764049075653	221	0.0125021503472575	78.5	0.652641237383668	77.5	0.587035344751349	686.0697	0.0107505588228911	11.4125	0.827027250547906
DEH1_2016	PHW52/LH51	102.5	0.0128070375063241	23.35	1.31900946831755	0.0108696	66.5764049075653	242	0.0125021503472575	77.5	0.652641237383668	78.5	0.587035344751349	680.2774	0.0107505588228911	13.4507	0.827027250547906
DEH1_2016	PHW52/LH82	89.5	0.0128070375063241	21.2	1.31900946831755	0	66.5764049075653	209.5	0.0125021503472575	78	0.652641237383668	79	0.587035344751349	728.5468	0.0107505588228911	11.7914	0.827027250547906
DEH1_2016	PHW52/PHG29	104	0.0128070375063241	20.9	1.31900946831755	0.0084746	66.5764049075653	250.5	0.0125021503472575	74.5	0.652641237383668	76	0.587035344751349	733.6956	0.0107505588228911	13.5815	0.827027250547906
DEH1_2016	PHW52/PHG47	93	0.0128070375063241	19.25	1.31900946831755	0.0172414	66.5764049075653	244.5	0.0125021503472575	75.5	0.652641237383668	76.5	0.587035344751349	729.834	0.0107505588228911	10.9257	0.827027250547906
DEH1_2016	PHW52/PHG83	118.5	0.0128070375063241	21.9	1.31900946831755	0.3068182	66.5764049075653	235	0.0125021503472575	79.5	0.652641237383668	80.5	0.587035344751349	736.27	0.0107505588228911	8.1765	0.827027250547906
DEH1_2016	PHW52/PHK56	116	0.0128070375063241	22.3	1.31900946831755	0	66.5764049075653	259	0.0125021503472575	76.5	0.652641237383668	74	0.587035344751349	698.9416	0.0107505588228911	15.6749	0.827027250547906
DEH1_2016	PHW52/PHK76	97.5	0.0128070375063241	21.2	1.31900946831755	0.2314815	66.5764049075653	227.5	0.0125021503472575	76.5	0.652641237383668	76.5	0.587035344751349	748.4982	0.0107505588228911	10.8884	0.827027250547906
DEH1_2016	PHW52/PHM49	128	0.0128070375063241	22.75	1.31900946831755	0	66.5764049075653	256.5	0.0125021503472575	76.5	0.652641237383668	78.5	0.587035344751349	704.0903	0.0107505588228911	14.0636	0.827027250547906
DEH1_2016	PHW52/PHN82	106.75	0.0255131461456423	20.25	2.62749122690856	0	132.587838063718	251.75	0.0248944289368306	77	1.2998099357714	78.75	1.16902986174572	721.1455	0.0213003754421754	12.2538	1.65405450109581
DEH1_2016	PHW52/PHW30	121.5	0.0128070375063241	20.15	1.31900946831755	0.0183873	66.5764049075653	273	0.0125021503472575	76.5	0.652641237383668	78	0.587035344751349	734.3392	0.0107505588228911	14.6423	0.827027250547906
DEH1_2016	PHW52/PHZ51	128.5	0.0128070375063241	20.2	1.31900946831755	0.2321429	66.5764049075653	272.5	0.0125021503472575	77	0.652641237383668	78	0.587035344751349	740.7751	0.0107505588228911	14.8893	0.827027250547906
DEH1_2016	PHW52/Q381	115	0.0128070375063241	21	1.31900946831755	0.0526316	66.5764049075653	250	0.0125021503472575	75.5	0.652641237383668	76	0.587035344751349	734.9828	0.0107505588228911	11.479	0.827027250547906
DEH1_2016	PHW52/TX205	134.5	0.0128070375063241	24.2	1.31900946831755	0.0281272	66.5764049075653	273	0.0125021503472575	80.5	0.652641237383668	80.5	0.587035344751349	658.3952	0.0107505588228911	13.959	0.827027250547906
DEH1_2016	Q381/B47	109	0.0128070375063241	16.3	1.31900946831755	0.5084746	66.5764049075653	232.5	0.0125021503472575	76.5	0.652641237383668	76.5	0.587035344751349	NA	NA	11.1313	0.827027250547906
DEH1_2016	R229/3IIH6	119	0.0128070375063241	19.3	1.31900946831755	0.037037	66.5764049075653	240	0.0125021503472575	76.5	0.652641237383668	76.5	0.587035344751349	695.7236	0.0107505588228911	10.335	0.827027250547906
DEH1_2016	REDEAR-B/LH195	154.5	0.0128070375063241	28.85	1.31900946831755	0.2768199	66.5764049075653	276.5	0.0125021503472575	79	0.652641237383668	78.5	0.587035344751349	698.9416	0.0107505588228911	11.6345	0.827027250547906
DEH1_2016	SD101/3IIH6	118.5	0.0128070375063241	17.25	1.31900946831755	0.3728814	66.5764049075653	248	0.0125021503472575	77	0.652641237383668	77	0.587035344751349	725.3289	0.0107505588228911	9.7469	0.827027250547906
DEH1_2016	TR9-1-1-6/3IIH6	135.5	0.0128070375063241	16.15	1.31900946831755	0.3147841	66.5764049075653	272	0.0125021503472575	73.5	0.652641237383668	74.5	0.587035344751349	692.5057	0.0107505588228911	8.0365	0.827027250547906
DEH1_2016	TX714/PHZ51	150.5	0.0128070375063241	19.4	1.31900946831755	0	66.5764049075653	278	0.0125021503472575	74	0.652641237383668	73	0.587035344751349	730.4776	0.0107505588228911	11.069	0.827027250547906
DEH1_2016	TX714/TX777	179.5	0.0128070375063241	NA	1.31900946831755	0.009434	66.5764049075653	299	0.0125021503472575	79.5	0.652641237383668	80	0.587035344751349	671.9107	0.0107505588228911	11.7005	0.827027250547906
DEH1_2016	VA35/LH195	143.4273	0.00640329375250313	24.3474	0.659488909488181	0.1770172	33.2881121920235	260.3073	0.0062508554301134	77.6982	0.326323731812819	76.5869	0.29351752498305	707.0318	0.00537504069098722	13.0554	0.41351358392259
DEH1_2016	W10004_0007/3IIH6	110.5	0.0128070375063241	17.15	1.31900946831755	0.0283019	66.5764049075653	231	0.0125021503472575	77	0.652641237383668	75	0.587035344751349	726.6161	0.0107505588228911	10.8416	0.827027250547906
DEH1_2016	W10004_0008/3IIH6	143.5	0.0128070375063241	15.2	1.31900946831755	0.0373928	66.5764049075653	259.5	0.0125021503472575	73.5	0.652641237383668	73.5	0.587035344751349	725.3289	0.0107505588228911	12.4071	0.827027250547906
DEH1_2016	W10004_0041/3IIH6	120	0.0128070375063241	15.35	1.31900946831755	0.1575974	66.5764049075653	256.5	0.0125021503472575	75	0.652641237383668	74	0.587035344751349	707.3083	0.0107505588228911	11.1956	0.827027250547906
DEH1_2016	W10004_0045/3IIH6	121.5	0.0128070375063241	16.2	1.31900946831755	0.0267857	66.5764049075653	255	0.0125021503472575	75	0.652641237383668	74	0.587035344751349	713.1006	0.0107505588228911	12.3941	0.827027250547906
DEH1_2016	W10004_0062/3IIH6	98	0.0128070375063241	15.2	1.31900946831755	0.2376437	66.5764049075653	221.5	0.0125021503472575	76.5	0.652641237383668	75.5	0.587035344751349	698.9416	0.0107505588228911	6.8538	0.827027250547906
DEH1_2016	W10004_0072/3IIH6	151	0.0128070375063241	15.2	1.31900946831755	0.1724138	66.5764049075653	276.5	0.0125021503472575	75	0.652641237383668	74.5	0.587035344751349	726.6161	0.0107505588228911	10.9043	0.827027250547906
DEH1_2016	W10004_0080/3IIH6	147	0.0128070375063241	15.2	1.31900946831755	0.166779	66.5764049075653	270.5	0.0125021503472575	75.5	0.652641237383668	76.5	0.587035344751349	700.2288	0.0107505588228911	12.0039	0.827027250547906
DEH1_2016	W10004_0095/3IIH6	140	0.0128070375063241	15.1	1.31900946831755	0.8745111	66.5764049075653	258	0.0125021503472575	75.5	0.652641237383668	75	0.587035344751349	708.5955	0.0107505588228911	9.1015	0.827027250547906
DEH1_2016	W10004_0121/3IIH6	129.5727	0.00640358882479584	15.2526	0.659499370985897	0.1939102	33.2887139370842	265.6927	0.00625121329812414	77.3018	0.326329466509372	76.4131	0.29352294903163	723.031	0.00537550511078799	11.0546	0.41351358392259
DEH1_2016	W10004_0140/3IIH6	150	0.0128070375063241	15.05	1.31900946831755	0.1342593	66.5764049075653	267	0.0125021503472575	74.5	0.652641237383668	74	0.587035344751349	719.5365	0.0107505588228911	11.4421	0.827027250547906
DEH1_2016	W10004_0148/3IIH6	139	0.0128070375063241	15.2	1.31900946831755	0.1325666	66.5764049075653	275.5	0.0125021503472575	76.5	0.652641237383668	74	0.587035344751349	723.3981	0.0107505588228911	12.1358	0.827027250547906
DEH1_2016	W10004_0178/3IIH6	142	0.0128070375063241	15.3	1.31900946831755	0.0307106	66.5764049075653	273	0.0125021503472575	73	0.652641237383668	72	0.587035344751349	728.5468	0.0107505588228911	11.7657	0.827027250547906
DEH1_2016	W10004_0208/3IIH6	132	0.0128070375063241	15.5	1.31900946831755	0.5	66.5764049075653	261.5	0.0125021503472575	74.5	0.652641237383668	74.5	0.587035344751349	711.1698	0.0107505588228911	11.8297	0.827027250547906
DEH1_2016	W10004_0212/3IIH6	133.5	0.0128070375063241	15.3	1.31900946831755	0.0861077	66.5764049075653	267	0.0125021503472575	77	0.652641237383668	75.5	0.587035344751349	702.8031	0.0107505588228911	11.7921	0.827027250547906
DEH1_2016	W10004_0225/3IIH6	124	0.0128070375063241	15.25	1.31900946831755	0.04	66.5764049075653	240	0.0125021503472575	76.5	0.652641237383668	77	0.587035344751349	695.7236	0.0107505588228911	11.63	0.827027250547906
DEH1_2016	W10004_0258/3IIH6	120.5	0.0128070375063241	15	1.31900946831755	0.1066729	66.5764049075653	258.5	0.0125021503472575	75	0.652641237383668	74	0.587035344751349	671.2671	0.0107505588228911	9.9668	0.827027250547906
DEH1_2016	W10004_0292/3IIH6	117.5	0.0128070375063241	15.35	1.31900946831755	0.1302632	66.5764049075653	232	0.0125021503472575	75	0.652641237383668	75.5	0.587035344751349	725.9725	0.0107505588228911	9.3773	0.827027250547906
DEH1_2016	W10005_0107/B47	112.5	0.0128070375063241	17.2	1.31900946831755	0.1272727	66.5764049075653	235.5	0.0125021503472575	76	0.652641237383668	77	0.587035344751349	737.5571	0.0107505588228911	9.2177	0.827027250547906
DEH1_2016	W10005_0147/B47	111	0.0128070375063241	15.35	1.31900946831755	0.4067797	66.5764049075653	238.5	0.0125021503472575	74	0.652641237383668	74	0.587035344751349	720.8237	0.0107505588228911	9.4705	0.827027250547906
DEH1_2016	W10008_0069/B47	135.5	0.0128070375063241	17.3	1.31900946831755	0.2361453	66.5764049075653	246.5	0.0125021503472575	76	0.652641237383668	76	0.587035344751349	708.5955	0.0107505588228911	12.6844	0.827027250547906
DEH1_2016	W37A/B47	136	0.0128070375063241	17.1	1.31900946831755	0.6315789	66.5764049075653	256.5	0.0125021503472575	75.5	0.652641237383668	76	0.587035344751349	739.4879	0.0107505588228911	7.2526	0.827027250547906
DEH1_2016	WF9/H95	113.5	0.0128070375063241	21.85	1.31900946831755	0.0288462	66.5764049075653	254.5	0.0125021503472575	77.5	0.652641237383668	77	0.587035344751349	695.7236	0.0107505588228911	12.1145	0.827027250547906
GAH1_2014	(TX739)_LAMA2002-10-1/PB80	109.5193	0.027871572190776	16.45	1.36153420105234	0.0612245	170.741740583623	244.3742	0.0140185709491149	72.7363	1.27541948778334	74.3275	1.70447574128434	NA	NA	10.3414	1.24612358779673
GAH1_2014	B37/C103	79.1679	0.0295389694386151	16.65	1.36527277762393	0.3010216	170.741740583623	212.0225	0.0150552962336196	68.403	1.36844274359729	72.0285	1.87836010422507	NA	NA	4.1433	1.42748021771943
GAH1_2014	B37/H95	92.0763	0.0283505308558072	14.7	1.36527277762393	0.0487941	170.741740583623	220.1429	0.0143086312948284	67.622	1.32334412717103	67.1039	1.62442692700947	NA	NA	6.0082	1.38023144124777
GAH1_2014	B47/LH195	76.9647	0.0291280921798352	16.6	1.36222653004708	0.0162698	170.741740583623	194.8774	0.0148037081152608	69.9661	1.33747424197822	70.6882	1.83690095319766	NA	NA	7.1171	1.42162557745963
GAH1_2014	B47/PB80	79.9454	0.0293048649539614	15.35	1.36153420105234	0.0396825	170.741740583623	201.4099	0.0148219318019025	65.587	1.2967912864292	67.2758	1.88630891520169	NA	NA	5.57	1.34592690847551
GAH1_2014	B73/MO17	84.5872	0.0291018151458435	16.15	1.36527277762393	0.0855227	170.741740583623	225.1532	0.0148016832611895	71.075	1.34188990285546	74.213	1.89557703090471	NA	NA	6.0894	1.35946576407629
GAH1_2014	B73/PHG35	96.3439	0.0290838989863037	15.6	1.36527277762393	0.0247617	170.741740583623	233.713	0.0147783974393695	69.2	1.34907271121578	69.9685	1.78142418945216	NA	NA	7.3603	1.41929286923112
GAH1_2014	B73/PHM49	98.4706	0.0303213084051871	14.75	1.36527277762393	0.4453125	170.741740583623	212.9808	0.015555941402748	68.9396	1.39970562260818	69.8257	2.05834625152545	NA	NA	7.4187	1.47020079586516
GAH1_2014	B73/PHN82	64.4136	0.0266520789314325	15.7	1.36527277762393	0.0185185	170.741740583623	176.4657	0.0132744370779128	66.1999	1.23856343832794	67.0635	1.43467792473367	NA	NA	NA	1.25938800713534
GAH1_2014	B73/TX205	94.2644	0.0281594251540491	15.6	1.36527277762393	0.0642857	170.741740583623	228.7761	0.0142200439292091	67.9274	1.35884604062408	68.3293	1.80682080543554	NA	NA	6.0614	1.41412431962677
GAH1_2014	B73_NC230-032-1-1-1-1/LH195	72.9288	0.0291722853733668	15.5	1.36776516200498	1.3747684e-16	170.741740583623	188.2915	0.0148219318019025	72.8047	1.34712982042979	73.2539	1.89442263926911	NA	NA	6.284	1.35960298220738
GAH1_2014	B73_NC230-041-1-1-1-1/LH195	80.6753	0.0286443558722602	14.55	1.36776516200498	1.3921156e-16	170.741740583623	195.4959	0.0145187099047256	73.4252	1.34218428024728	73.8202	1.76631815033477	NA	NA	5.9875	1.34487490280382
GAH1_2014	B73_NC230-041-1-1-1-1/PB80	90.432	0.0278369342823324	15.45	1.36942675159236	0.1020408	170.741740583623	191.6939	0.0139795925082424	70.7663	1.29620253164557	72.1265	1.62525149246347	NA	NA	4.9245	1.26034853405297
GAH1_2014	B73_NC230-126-1-1-1-1/LH195	73.4283	0.0268121299566548	16.15	1.36776516200498	1.3053794e-16	170.741740583623	200.0964	0.0134106085142076	72.5947	1.30915513688549	72.5075	1.74293347405917	NA	NA	5.8511	1.30398389973929
GAH1_2014	B73_NC230-127-1-1-1-1/PB80	93.1179	0.0295580800087909	16.5	1.36942675159236	2.0426369e-16	170.741740583623	204.7421	0.0150755447743325	71.1189	1.37327053282308	70.9362	1.88406609716679	NA	NA	4.6389	1.43287746420894
GAH1_2014	B73_NC230-128-1-1-1-1/LH195	92.3398	0.0283887519961588	15.65	1.36776516200498	0.2200292	170.741740583623	226.0064	0.0144534083609262	73.6174	1.31881071533706	74.2544	1.80576536165441	NA	NA	5.9847	1.40607418926954
GAH1_2014	B73_NC230-128-1-1-1-1/PB80	98.6705	0.0296643825553938	15.95	1.36942675159236	0.2043887	170.741740583623	203.5729	0.0151297096207398	74.0184	1.37739181630851	75.8889	1.9313301889904	NA	NA	4.5563	1.39541691442163
GAH1_2014	B73_NC230-129-1-1-1-1/LH195	93.2048	0.0304049171497062	15.9	1.36776516200498	1.3747684e-16	170.741740583623	207.9836	0.0155903639219601	71.7349	1.36738298498675	72.529	2.01088426399288	NA	NA	7.8168	1.44888624616933
GAH1_2014	CG60/LH162	32.9314	0.0139781876729656	NA	1.36527277762393	1.2793586e-16	170.741740583623	120.8613	0.00703181197610065	58.973	1.29932293199882	58.8276	1.6491968732478	NA	NA	NA	1.30686548049216
GAH1_2014	CG60/LH82	64.9406	0.0294804433174517	NA	1.36527277762393	1.2793586e-16	170.741740583623	170.0194	0.0150446657497452	60.1514	1.3671474830733	60.4951	1.90768165176952	NA	NA	NA	1.42930979280062
GAH1_2014	CGR01/LH198	100.8329	0.0304729985559575	16.8	1.36527277762393	0.0666667	170.741740583623	232.2855	0.0156409852737426	70.4225	1.37833382396232	71.5554	2.06194135690491	NA	NA	9.5256	1.47674152678041
GAH1_2014	CGR01/LH82	44.074	0.0256380243014788	NA	1.36527277762393	0.0113636	170.741740583623	124.3552	0.0126533130915421	64.8979	1.24297909920518	66.5692	1.39687984432204	NA	NA	NA	1.26620317431277
GAH1_2014	LH132/LH51	86.5182	0.0291221201266553	15.8	1.36527277762393	0.009434	170.741740583623	211.3845	0.0147930776313865	68.7016	1.34824845451869	70.8873	1.78950493090142	NA	NA	6.0609	1.41732607601884
GAH1_2014	LH162/PB80	60.2736	0.0144571463379967	NA	0.680774093049017	0.0145666	85.3722415049064	193.0378	0.00731630397311804	65.993	0.668060052987931	66.8521	0.864507404597777	NA	NA	NA	0.683986644101907
GAH1_2014	LH212HT/PB80	86.8173	0.0277927410888009	14.85	1.36153420105234	1.3010426e-16	170.741740583623	219.2041	0.0139426389214412	68.6492	1.27194583455991	68.9379	1.61598337676045	NA	NA	3.715	1.25920504962722
GAH1_2014	LH216/LH195	92.3688	0.0279671250416551	15.8	1.36222653004708	2.6584637e-16	170.741740583623	232.5973	0.0140717233684865	71.9423	1.28731233441272	72.0564	1.64906494277516	NA	NA	10.9884	1.30704843800027
GAH1_2014	LH38/PB80	58.3062	0.0275646086573272	15.15	1.36153420105234	0.0083333	170.741740583623	195.1418	0.0138302595204842	67.342	1.25022078304386	68.5778	1.56499224908473	NA	NA	4.9474	1.30759731052463
GAH1_2014	LH51/PB80	97.8146	0.029246338832798	15.6	1.36153420105234	1.3660947e-16	170.741740583623	228.1995	0.0155736588758719	69.6477	1.40058875478363	69.8826	2.03769913255714	NA	NA	5.169	1.46800530576774
GAH1_2014	LH57/PB80	61.779	0.0151785703621334	14.8317	0.680750553863196	0	85.3671165959635	193.2232	0.00783162933426342	65.5456	0.703208713570798	66.7642	1.04234968171773	NA	NA	2.4073	0.7329735169007
GAH1_2014	LH59/PB80	88.6496	0.0287184093316914	15.8	1.36153420105234	1.2967058e-16	170.741740583623	221.8348	0.0150689639986008	67.4108	1.35478363261702	67.9314	1.89574194399551	NA	NA	6.3035	1.38100901065727
GAH1_2014	LH74/PHG35	71.2139	0.0294075842686564	15.55	1.36527277762393	1.1449175e-16	170.741740583623	197.5793	0.0149662026544824	67.4288	1.3556078893141	68.3996	1.90613146871599	NA	NA	4.0148	1.37048895394045
GAH1_2014	LH74/PHM49	96.6882	0.0292140897456264	14.9	1.36527277762393	1.2836954e-16	170.741740583623	216.7829	0.0149201372243604	68.2843	1.41136296732411	68.7866	2.08611761601636	NA	NA	2.1584	1.47788501120615
GAH1_2014	LH74/PHN82	72.8271	0.0278214069440646	16.05	1.36527277762393	1.2099696e-16	170.741740583623	199.3735	0.0139978161948841	67.4476	1.28018840153076	68.0224	1.69979220950559	NA	NA	4.424	1.24873073228743
GAH1_2014	LH74/TX205	92.7587	0.0295592744194269	14.5	1.36527277762393	0.1147541	170.741740583623	225.7559	0.0150775696284038	71.8373	1.37062113629673	72.2865	1.9023054850094	NA	NA	8.8084	1.42917257466953
GAH1_2014	LH82/LH198	60.7724	0.027681660899654	NA	1.36527277762393	1.3487475e-16	170.741740583623	169.0149	0.0138996107724261	62.3407	1.26446864880777	62.7487	1.68020053431841	NA	NA	NA	1.30375520285414
GAH1_2014	M0001/LH195	94.2311	0.0295616632406988	15.7	1.36326502353919	0.0234375	170.741740583623	215.5991	0.0150573210876909	72.5334	1.36956137768619	72.7485	1.86430950888882	NA	NA	6.0795	1.4266569089329
GAH1_2014	M0007/LH195	85.7932	0.0292594773497939	16.75	1.36326502353919	0.0217391	170.741740583623	205.2344	0.0148796401429345	69.7375	1.35637327053282	71.3607	1.81668260826544	NA	NA	7.5962	1.41243196267667
GAH1_2014	M0007/PB80	84.3383	0.029252310885978	15.8	1.36624203821656	0.0440705	170.741740583623	213.3722	0.0148669848049888	70.5243	1.35872828966735	70.7646	1.81437382499423	NA	NA	6.9848	1.3756575035448
GAH1_2014	M0008/PB80	89.7004	0.0292224506200783	16.7	1.36624203821656	0.031622	170.741740583623	208.7342	0.0148568605346323	68.9216	1.36173093906388	70.8533	1.78376595534154	NA	NA	4.7532	1.41778346978914
GAH1_2014	M0010/LH195	93.1406	0.0276195515465826	15.3	1.36326502353919	0.1546969	170.741740583623	226.4282	0.013822160104199	69.9775	1.26329113924051	70.9979	1.55170025396616	NA	NA	7.1409	1.30869505557334
GAH1_2014	M0010/PB80	95.4209	0.0304359718262419	15.3	1.36624203821656	0.1632653	170.741740583623	235.1702	0.0156146621708157	70.8275	1.4040035325287	71.0109	2.08407269369043	NA	NA	4.9326	1.47751909618991
GAH1_2014	M0015/PB80	88.9478	0.0293180034709573	15.1	1.36624203821656	0.0333333	170.741740583623	205.6555	0.0148791339294166	72.1049	1.34336178981454	73.8982	1.83680200534318	NA	NA	5.6703	1.40964186067786
GAH1_2014	M0016/PB80	85.9818	0.0305410799622088	15.05	1.36624203821656	0.0703125	170.741740583623	207.3742	0.0156344044980108	70.0716	1.39052104798352	69.4596	2.08041162307464	NA	NA	5.5423	1.47445455792892
GAH1_2014	M0028/PB80	79.9386	0.0305351079090289	15.1	1.36624203821656	1.2663481e-16	170.741740583623	202.2814	0.0156749015794368	69.3455	1.41807477185752	69.3891	2.05653220752663	NA	NA	5.5814	1.44573022915428
GAH1_2014	M0029/PB80	78.9761	0.0304729985559575	15.35	1.36624203821656	0.0238095	170.741740583623	201.4003	0.0156318734304217	71.4193	1.40312040035325	72.6723	2.08374286750882	NA	NA	5.2829	1.4725792434707
GAH1_2014	M0030/PB80	94.8587	0.0297551577637289	15.55	1.36624203821656	0.092576	170.741740583623	207.5038	0.0151266723396328	69.7271	1.3602590521048	70.3706	1.92588805699396	NA	NA	6.1572	1.39399899373371
GAH1_2014	M0031/LH195	79.5254	0.0285129707023015	15.65	1.36326502353919	2.8319361e-16	170.741740583623	217.3516	0.0144037994361794	72.0564	1.329172799529	73.3592	1.66136745934892	NA	NA	6.2958	1.38654347527787
GAH1_2014	M0031/PB80	90.0184	0.0295676352938788	15.3	1.36624203821656	0.0284727	170.741740583623	218.8721	0.0150259358495857	73.8122	1.36667647924639	74.388	1.78818562617501	NA	NA	7.0132	1.41746329414993
GAH1_2014	M0039/LH195	102.0454	0.0293633910751248	14.85	1.36326502353919	0.0350877	170.741740583623	229.6341	0.0149150750891822	71.4209	1.34712982042979	71.9728	1.89564299614103	NA	NA	8.6735	1.3648630105658
GAH1_2014	M0039/PB80	82.7989	0.0296369111107661	14.8	1.36624203821656	0.0365854	170.741740583623	210.2115	0.0150957933150455	70.9975	1.36626435089785	70.2571	1.92595402223028	NA	NA	7.2823	1.39454786625806
GAH1_2014	M0048/PB80	84.2956	0.0270617617795763	16.45	1.36624203821656	0.0502525	170.741740583623	186.8974	0.0134997020933448	74.6463	1.25916985575508	76.0968	1.47692865859692	NA	NA	5.2839	1.26144627910168
GAH1_2014	M0052/PB80	79.435	0.0269339598415256	15.6	1.36624203821656	0.0675676	170.741740583623	210.5908	0.0135012207338982	69.4797	1.25022078304386	70.6747	1.50239123981662	NA	NA	7.1307	1.23345378035951
GAH1_2014	M0056/PB80	101.016	0.0304646376815056	16.4	1.36624203821656	0.1052632	170.741740583623	205.4489	0.015645541195403	72.4766	1.37609655578452	74.3431	2.08585375507108	NA	NA	3.8595	1.47111558340575
GAH1_2014	M0057/LH195	81.6923	0.0288342671633822	15.75	1.36326502353919	0.0450057	170.741740583623	222.6663	0.0145840114485249	73.1106	1.30756549896968	74.8041	1.75345492925228	NA	NA	5.7491	1.35201024562045
GAH1_2014	M0058/LH195	85.0161	0.0305506352472967	15.45	1.36326502353919	2.8622937e-16	170.741740583623	213.9215	0.0156187118789583	71.0881	1.37085663821019	71.3532	2.07747617005838	NA	NA	6.5936	1.47541508484654
GAH1_2014	M0066/LH195	81.3566	0.0296966316425655	14.8	1.36326502353919	2.7538735e-16	170.741740583623	206.7755	0.0151271785531507	71.4013	1.36885487194583	71.545	1.91203535736667	NA	NA	7.2503	1.39555413255271
GAH1_2014	M0075/PB80	94.5427	0.0278942659928598	15.35	1.36624203821656	0.0192308	170.741740583623	206.5737	0.0139998410489554	70.077	1.27483073299971	69.581	1.70167221874072	NA	NA	7.7258	1.24712985409139
GAH1_2014	M0099/LH195	104.1767	0.0284090569769706	15.1	1.36326502353919	0.0083333	170.741740583623	247.4143	0.0143248301273988	72.1036	1.300323815131	74.5381	1.71931791945645	NA	NA	8.8937	1.2821204775191
GAH1_2014	M0127/LH195	81.8225	0.0276959938272858	15.45	1.36326502353919	0.0240275	170.741740583623	223.0684	0.01392897115646	72.0533	1.27000294377392	72.3907	1.66176325076685	NA	NA	8.5588	1.28591684581256
GAH1_2014	M0143/PB80	81.4861	0.030431194183698	15.55	1.36624203821656	0.0948801	170.741740583623	218.4177	0.0156121311032266	70.8368	1.40724168383868	72.1211	2.05287113691085	NA	NA	5.7894	1.47454603668298
GAH1_2014	M0154/LH195	79.2897	0.0284066681556986	15.9	1.36326502353919	0.0241935	170.741740583623	209.5492	0.0156637648820447	72.327	1.39540771268767	73.6025	2.08667832052508	NA	NA	7.2287	1.47363124914239
GAH1_2014	M0164/LH195	86.6838	0.0291961735860865	15.3	1.36326502353919	0.0232558	170.741740583623	227.1824	0.0148396492750263	73.8498	1.34801295260524	75.4509	1.81549523401168	NA	NA	8.6015	1.41599963408498
GAH1_2014	M0164/PB80	90.8275	0.0304706097346856	15.25	1.36624203821656	1.1969592e-16	170.741740583623	228.6858	0.0156349107115287	70.9466	1.40500441566088	70.374	2.08651340743428	NA	NA	7.9184	1.44810867675982
GAH1_2014	M0262/PB80	89.5009	0.015111683366518	15.7862	0.683262184990307	0.0145666	85.3722415049064	233.9969	0.0077632905093571	73.9442	0.700559317044451	72.8199	1.04327319502622	NA	NA	4.9396	0.734025522572383
GAH1_2014	M0264/PB80	75.5242	0.0295318029747991	15.65	1.36624203821656	1.2706849e-16	170.741740583623	192.8059	0.0150785820554395	70.2344	1.37109214012364	71.3732	1.9081104258056	NA	NA	4.4001	1.4342039061428
GAH1_2014	M0266/PB80	81.1323	0.0275024993042558	15.6	1.36624203821656	1.2186432e-16	170.741740583623	198.5502	0.0138186166095742	69.492	1.28595819841036	71.6985	1.55493255054586	NA	NA	4.4931	1.30896949183552
GAH1_2014	M0275/PB80	93.8332	0.030426416541154	15.65	1.36624203821656	1.2880322e-16	170.741740583623	200.1926	0.0155908701354779	72.0097	1.39799823373565	72.1439	2.05640027705399	NA	NA	5.3808	1.47289941910991
GAH1_2014	M0276/LH195	103.0803	0.0269100716288058	15.8	1.36326502353919	2.7538735e-16	170.741740583623	227.0524	0.013392384827566	71.4804	1.24186046511628	72.001	1.46677001220357	NA	NA	7.6953	1.21364863010566
GAH1_2014	M0276/PB80	80.938	0.0292272282626222	16.05	1.36624203821656	0.0555556	170.741740583623	208.955	0.0148533170400076	69.9513	1.34530468060053	71.1117	1.89547808305023	NA	NA	4.5497	1.36326213236976
GAH1_2014	M0310/PB80	111.7301	0.0305446631941168	16.15	1.36624203821656	0.0347942	170.741740583623	224.3811	0.0156911004120072	69.5967	1.41807477185752	69.3562	2.08733797288829	NA	NA	7.1753	1.48017198005763
GAH1_2014	M0315/PB80	97.6492	0.030523163802669	16.1	1.36624203821656	0.0476671	170.741740583623	208.7978	0.0156531343981703	71.6924	1.41148071828084	73.0742	2.03149840034302	NA	NA	4.6935	1.46288249554041
GAH1_2014	M0321/LH195	99.5258	0.0281821189561329	17.25	1.36326502353919	0.07	170.741740583623	204.865	0.014173978499087	71.6393	1.28654695319399	71.7691	1.64553580263201	NA	NA	6.3786	1.3756575035448
GAH1_2014	M0323/PB80	91.7975	0.0283576973196231	15.85	1.36624203821656	0.2698604	170.741740583623	222.571	0.0142909138217045	71.2253	1.30314983809243	73.2077	1.74214189122333	NA	NA	3.0266	1.26903901568861
GAH1_2014	M0325/LH195	95.335	0.0292427556008901	15	1.36326502353919	0.0325397	170.741740583623	231.6702	0.0148715407266493	73.3593	1.35178098322049	72.4934	1.83953956265048	NA	NA	6.1424	1.42661116955587
GAH1_2014	M0325/PB80	90.9381	0.0296488552171259	15.05	1.36624203821656	0.0811355	170.741740583623	226.0613	0.0151064237989198	71.398	1.37109214012364	71.3946	1.88347241003991	NA	NA	7.6279	1.43484425742121
GAH1_2014	M0326/LH195	102.5219	0.0283326146962674	15.2	1.36326502353919	0.0083333	170.741740583623	220.9556	0.0142939511028115	73.7672	1.31033264645275	74.0334	1.6350143474389	NA	NA	6.9764	1.37231852902163
GAH1_2014	M0326/PB80	108.6641	0.0152072362173971	16.3862	0.683262184990307	0.0145666	85.3722415049064	229.3454	0.00781188700706826	71.5899	0.705092728878422	71.6491	1.04350407335334	NA	NA	7.28	0.739742944701093
GAH1_2014	M0328/PB80	105.5964	0.0279575697565672	16.35	1.36624203821656	0.009434	170.741740583623	214.9899	0.0140762792901469	71.0875	1.29773329408301	72.8182	1.64922985586596	NA	NA	7.213	1.31098202442483
GAH1_2014	M0368/PB80	88.5508	0.0292821711518777	16.45	1.36624203821656	0.0357143	170.741740583623	201.1939	0.01490393839179	68.6624	1.36231969384751	70.4124	1.84092483261321	NA	NA	6.4589	1.42953848968577
GAH1_2014	M0369/PB80	81.0511	0.0303726680625346	16.15	1.36624203821656	0.1583333	170.741740583623	193.4412	0.015593401203067	69.9892	1.40335590226671	71.3881	2.08638147696164	NA	NA	4.8771	1.47422586104377
GAH1_2014	M0382/LH195	77.4275	0.0304658320921416	15.7	1.36326502353919	2.8622937e-16	170.741740583623	199.5891	0.0156318734304217	72.8939	1.40453341183397	72.9702	2.03977703750124	NA	NA	6.368	1.47042949275031
GAH1_2014	M0382/PB80	91.4667	0.0268885722373581	16.35	1.36624203821656	0.0086207	170.741740583623	217.189	0.0134480683145267	70.0032	1.25157491904622	70.711	1.50921864177578	NA	NA	6.7767	1.2699538032292
GAH1_2014	M0383/LH195	85.469	0.0292236450307143	15.45	1.36326502353919	2.6888214e-16	170.741740583623	204.1485	0.0148477486913115	71.1467	1.3476008242567	72.5328	1.81312048550414	NA	NA	8.8767	1.40891003064538
GAH1_2014	MO44_LH145_0081/PB80	99.728	0.0305446631941168	15.95	1.36942675159236	0.1311301	170.741740583623	220.3114	0.015683000995722	72.1953	1.41884015307624	71.0158	2.06405224446717	NA	0.000138709450919815	6.0337	1.47632987238714
GAH1_2014	MO44_LH145_0107/PB80	85.5904	0.0280316232159984	15.7	1.36942675159236	2.0426369e-16	170.741740583623	218.3115	0.0141436056880176	68.7837	1.30827200471004	69.0134	1.74012995151555	880.4347	0.000138709450919815	4.2432	1.26638613182088
GAH1_2014	MO44_LH145_0127/LH195	86.4347	0.0281868965986768	16.05	1.36776516200498	0.0153846	170.741740583623	197.3623	0.0141765095666762	66.5169	1.30803650279659	68.0718	1.66634783469112	NA	0.000138428591489959	5.5726	1.3150985683575
GAH1_2014	MOG_LH123HT-019-1-1-1-1-B/PB80	96.2068	0.0306402160449958	15.45	1.36942675159236	0.0153846	170.741740583623	216.3336	0.0157341285610223	70.4257	1.42048866647042	70.039	2.08809657310597	872.7116	0.000138709450919815	4.7697	1.48168137949961
GAH1_2014	MOG_LH123HT-031-1-1-1-1-B/LH195	95.8426	0.0281988407050367	15.3	1.36776516200498	0.2258065	170.741740583623	236.8448	0.014234724121226	71.1404	1.30980276714748	71.9072	1.65747551040602	875.9296	0.000138428591489959	6.4895	1.28975895348305
GAH1_2014	MOG_LH123HT-059-1-1-1-1-B/PB80	116.8665	0.0297850180296286	14.9	1.36942675159236	0.2087977	170.741740583623	262.9963	0.0151975422321283	71.4845	1.38757727406535	71.2127	1.90906692173225	855.3346	0.000138709450919815	4.9577	1.43923523761606
GAH1_2014	MOG_LH123HT-199-1-1-1-1-B/PB80	123.879	0.0305458576047528	15.3	1.36942675159236	0.2760444	170.741740583623	259.4918	0.0156835072092398	68.2819	1.41589637915808	69.5608	2.06398627923085	833.4524	0.000138709450919815	6.2967	1.47637561176417
GAH1_2014	MOG_LH145_0131/LH195	78.5063	0.0296285502363141	15.25	1.36776516200498	1.3010426e-16	170.741740583623	199.8456	0.015117560496312	67.7935	1.38021783926994	68.9916	1.91460800158317	896.5245	0.000138428591489959	6.0694	1.37849334492064
GAH1_2014	MOG_LH145_0131/PB80	82.1147	0.0297599354062728	14.35	1.36942675159236	0.0292593	170.741740583623	194.738	0.0151874179617718	66.0853	1.38692964380336	66.693	1.90313005046341	635.8695	0.000138709450919815	2.759	1.42546768513013
GAH1_2014	MOG_LH145_0163/LH195	87.2716	0.0303738624731706	16.05	1.36776516200498	0.0238095	170.741740583623	221.3876	0.0155523979081233	71.2915	1.414424492199	71.2534	1.99864771265543	854.797	6.92290759724758e-05	7.2931	1.42784613273567
GAH1_2014	MOG_LH145_0163/PB80	100.0176	0.0292117009243544	15.45	1.36942675159236	0.4795082	170.741740583623	222.1562	0.0148533170400076	67.5826	1.35425375331175	67.662	1.89590685708632	NA	0.000138709450919815	6.1743	1.36234734482916
GAH1_2014	MOG_LH145_0175/PB80	95.9889	0.0304526935751457	15.9	1.36942675159236	0.5570835	170.741740583623	225.8809	0.0156394666331891	70.0122	1.41165734471593	69.5904	2.08723902503381	NA	0.000138709450919815	2.6613	1.47747335681288
GAH1_2014	MOG_MO45-030-1-1-1-1-B/LH195	79.3888	0.0286168844276325	15.7	1.36776516200498	0.0083333	170.741740583623	204.9798	0.0144782128232996	69.3943	1.33005593170445	69.8046	1.75358685972493	892.663	0.000138428591489959	7.4142	1.30842061931116
GAH1_2014	MOG_MO45-030-1-1-1-1-B/PB80	88.9823	0.0282979767878237	16	1.36942675159236	0.09053	170.741740583623	216.2549	0.0142883827541154	67.621	1.3165145716809	69.4737	1.71829545829348	880.4347	0.000138709450919815	3.1568	1.31807162786443
GAH1_2014	MOG_MO45-045-1-1-1-1-B/PB80	102.1398	0.0282848382708278	15.8	1.36942675159236	0.3623839	170.741740583623	246.0734	0.0142625658647063	66.8017	1.31092140123639	68.6526	1.68518090966061	NA	0.000138709450919815	3.9117	1.3155559621278
GAH1_2014	MOG_MO45-054-1-1-1-1-B/LH195	82.2061	0.0272301736792506	16.65	1.36776516200498	1.2490009e-16	170.741740583623	211.5622	0.0135563980073411	63.448	1.26411539593759	69.5962	1.48576800026386	731.7648	0.000138428591489959	NA	1.21474637515437
GAH1_2014	MOG_MO45-054-1-1-1-1-B/PB80	89.8418	0.0305661625855646	15.55	1.36942675159236	0.1455579	170.741740583623	223.1541	0.0157042619634706	68.3268	1.42372681778039	69.6	2.06405224446717	892.0194	0.000138709450919815	4.3063	1.47491195169922
GAH1_2014	MOG_MO45-055-1-1-1-1-B/LH195	81.0108	0.0297790459764486	15.15	1.36776516200498	0.0690806	170.741740583623	222.2404	0.0151661569940231	70.4017	1.38510450397409	70.1341	1.88334047956727	893.9501	0.000138428591489959	6.9925	1.39216941865252
GAH1_2014	MOG_MO45-055-1-1-1-1-B/PB80	109.0432	0.0296500496277619	15.4	1.36942675159236	0.3704327	170.741740583623	257.8372	0.0151069300124377	67.9178	1.36962025316456	67.6583	1.931660015172	871.4244	0.000138709450919815	5.2355	1.38910488039153
GAH1_2014	MOG_MO45-071-1-1-1-1-B/LH195	94.2059	0.027678077667746	14.55	1.36776516200498	0.0771488	170.741740583623	223.0577	0.013859619904518	69.6636	1.28313217544893	71.1882	1.60351594709588	NA	0.000138428591489959	6.662	1.24100077756941
GAH1_2014	MOG_MO45-071-1-1-1-1-B/PB80	91.2164	0.028072233177622	14.8	1.36942675159236	0.3675304	170.741740583623	217.3835	0.0146224836758796	69.004	1.34236090668237	70.1338	1.72096705036446	875.9296	0.000138709450919815	2.6425	1.3949137812743
GAH1_2014	MOG_MO45-074-1-1-1-1-B/LH195	98.5827	0.0296070508448664	14.95	1.36776516200498	0.171875	170.741740583623	230.108	0.0150720012797078	69.2675	1.38062996761849	69.2116	1.81704541706521	NA	0.000138428591489959	5.6476	1.42610803640854
GAH1_2014	MOG_MO45-074-1-1-1-1-B/PB80	97.8126	0.0296799098936616	15.2	1.36942675159236	0.1666211	170.741740583623	233.1629	0.0151438835992389	69.3055	1.38451574919046	69.2272	1.91510274085557	NA	0.000138709450919815	4.2928	1.39692631386361
GAH1_2014	MOG_MO45-078-1-1-1-1-B/PB80	97.7461	0.0153195108171799	14.75	1.36942675159236	0.1832011	170.741740583623	224.1358	0.0156966687607033	66.8609	1.42284368560495	68.6096	2.06276592235892	707.9519	0.000138709450919815	2.8895	1.47610117550199
GAH1_2014	MOG_MO45-085-1-1-1-1-B/LH195	91.1304	0.0294529718728239	14.95	1.36776516200498	0.1718667	170.741740583623	216.4979	0.0150284669171749	69.1966	1.37591992934943	69.6632	1.88093274844157	859.8397	0.000138428591489959	4.4482	1.42363811004894
GAH1_2014	MOG_MO45-085-1-1-1-1-B/PB80	101.6058	0.0305398855515729	15.7	1.36942675159236	0.642927	170.741740583623	221.5944	0.0156642710955625	68.2129	1.41819252281425	68.6291	2.01457831722682	870.1372	0.000138709450919815	3.5027	1.47102410465169
GAH1_2014	MOG_MO45-128-1-1-1-1-B/PB80	84.7034	0.0303822233476225	15.35	1.36942675159236	0.2456089	170.741740583623	225.309	0.0155949198436205	65.8729	1.41030320871357	69.8366	2.05478412876414	NA	0.000138709450919815	3.35	1.47065818963546
GAH1_2014	MOG_MO45-139-1-1-1-1-B/PB80	96.0366	0.0296667713766658	16.1	1.36942675159236	0.1448718	170.741740583623	211.0193	0.0151266723396328	67.8983	1.37939358257286	68.5683	1.88307661862199	NA	0.000138709450919815	4.3732	1.428349265883
GAH1_2014	MOG_NC230-007-1-1-1-1-B/PB80	105.4634	0.0304550823964177	15.2	1.36942675159236	0.2921803	170.741740583623	231.4426	0.0156369355656	67.9397	1.41206947306447	69.5151	2.06375540090372	873.3552	0.000138709450919815	4.9448	1.47203037094635
GAH1_2014	MOG_NC230-008-1-1-1-1-B/PB80	105.756	0.0305410799622088	14.45	1.36942675159236	0.2649036	170.741740583623	228.9807	0.0156845196362755	68.0835	1.42284368560495	69.1907	2.05880800817969	887.5142	0.000138709450919815	4.5947	1.47729039930476
GAH1_2014	MOG_NC230-009-1-1-1-1-B/PB80	118.3119	0.0304921091261334	15.95	1.36942675159236	0.2223063	170.741740583623	252.5547	0.0156612338144555	66.208	1.41436561672064	67.9364	2.08740393812461	888.1578	0.000138709450919815	4.7736	1.47751909618991
GAH1_2014	MOG_NC230-010-1-1-1-1-B/PB80	101.8057	0.0304885258942254	15.2	1.36942675159236	0.3584432	170.741740583623	244.5966	0.0156870507038646	69.6609	1.42319693847513	72.3997	2.03390613146872	895.2373	0.000138709450919815	3.6713	1.47532360609248
GAH1_2014	MOG_NC230-011-1-1-1-1-B/PB80	110.8806	0.0289477361738011	15.1	1.36942675159236	0.2388759	170.741740583623	235.1049	0.0146776609493225	67.6579	1.34989696791286	67.8721	1.77858768429038	849.5423	0.000138709450919815	5.2492	1.35704157709372
GAH1_2014	MOG_NC230-028-1-1-1-1-B/PB80	91.1755	0.0292761990986977	15	1.36942675159236	0.1530612	170.741740583623	222.6603	0.0148523046129719	68.523	1.3378274948484	70.0993	1.88973910749035	840.532	0.000138709450919815	3.1963	1.36509170745094
GAH1_2014	MOG_NC230-043-1-1-1-1-B/PB80	102.6226	0.0286777993700678	15.55	1.36942675159236	0.2713585	170.741740583623	233.536	0.0144903619477274	71.2116	1.33352958492788	71.8884	1.75672020845015	NA	0.000138709450919815	5.0332	1.28953025659791
GAH1_2014	MOG_OH43_0179/PB80	94.954	0.0297694906913607	16.9	1.36942675159236	0.1698113	170.741740583623	248.1485	0.0151879241752896	68.7999	1.38457462466883	69.3661	1.908605165078	883.0091	0.000138709450919815	5.044	1.43900654073092
GAH1_2014	MOG_OH43_0300/LH195	91.2088	0.0277521311271773	15.1	1.36776516200498	0.6143758	170.741740583623	223.5484	0.0138778435911597	68.6815	1.25475419487783	70.0768	1.6295392328243	NA	0.000138428591489959	5.5226	1.27777523670128
GAH1_2014	MOG_OH43_0300/PB80	113.0199	0.0297288807297371	15.2	1.36942675159236	0.4137124	170.741740583623	243.3727	0.0151934925239857	69.2383	1.38793052693553	72.0345	1.88492364523896	850.8294	0.000138709450919815	2.4447	1.42752595709646
GAH1_2014	MOG_OH43_0402/PB80	89.7867	0.0281916742412208	14.85	1.36942675159236	0.1087662	170.741740583623	200.514	0.014188658691104	68.1587	1.30674124227259	68.9881	1.69055707642073	737.5571	0.000138709450919815	NA	1.25952522526643
GAH1_2014	MOG_PHG83-069-1-1-1-1-B/LH195	85.5357	0.0288987653377256	14.85	1.36776516200498	0.3699538	170.741740583623	210.0336	0.0146310893056826	70.9845	1.34271415955255	71.0204	1.78343612915993	NA	0.000138428591489959	5.7248	1.31839180350364
GAH1_2014	MOG_PHG83-069-1-1-1-1-B/PB80	104.8383	0.027781991393077	15.35	1.36942675159236	0.1437532	170.741740583623	221.6943	0.0139725055189929	69.8656	1.2830144244922	71.2229	1.70394801939378	861.1269	0.000138709450919815	5.4732	1.24292183140466
GAH1_2014	MOG_PHG83-090-1-1-1-1-B/LH195	94.7184	0.0288987653377256	16.55	1.36776516200498	0.0234375	170.741740583623	234.5719	0.0146285582380935	70.922	1.3320576979688	73.3199	1.78617368646723	NA	0.000138428591489959	6.6127	1.31834606412661
GAH1_2014	MOG_PHG83-090-1-1-1-1-B/PB80	121.2691	0.0295043315301714	16.35	1.36942675159236	0.2689099	170.741740583623	256.0454	0.0150507403119591	69.4012	1.36985575507801	71.0313	1.9374649559682	NA	0.000138709450919815	6.5473	1.39422769061885
GAH1_2014	MOG_PHG83-119-1-1-1-1-B/LH195	93.1449	0.0258530182159566	15	1.36776516200498	0.3307623	170.741740583623	237.4385	0.0127363321084654	72.2819	1.19746835443038	72.1603	1.35218839671493	874.6424	0.000138428591489959	5.8627	1.08640168320907
GAH1_2014	MOG_PHG83-129-1-1-1-1-B/LH195	79.5945	0.0293180034709573	15.7	1.36776516200498	0.0957512	170.741740583623	199.249	0.0148811587834879	69.6885	1.35401825139829	70.1443	1.86378178699825	NA	0.000138428591489959	7.5329	1.36001463660065
GAH1_2014	MOG_PHG83-129-1-1-1-1-B/PB80	89.0106	0.0305446631941168	14.7	1.36942675159236	2.1033522e-16	170.741740583623	206.5061	0.0156430101278139	67.8317	1.39982337356491	68.4782	2.080279692602	659.6824	0.000138709450919815	2.1876	1.48122398572931
GAH1_2014	MOG_PHG83-197-1-1-1-1-B/PB80	120.5355	0.0304861370729534	14.8	1.36942675159236	0.0545455	170.741740583623	242.766	0.0156723705118477	70.5659	1.4206652929055	70.2448	2.08773376430621	848.2551	0.000138709450919815	3.7527	1.47985180441842
GAH1_2014	MOG_PHG83-224-1-1-1-1-B/PB80	101.4938	0.0305398855515729	14.85	1.36942675159236	0.1981481	170.741740583623	242.8808	0.0156941376931141	66.2326	1.42254930821313	67.6408	2.08730499027013	827.6601	0.000138709450919815	2.4765	1.48040067694278
GAH1_2014	PHG39/PHG35	77.1967	0.027777213750533	16.1	1.36527277762393	1.0711917e-16	170.741740583623	211.4683	0.0139988286219198	69.0855	1.2921401236385	72.2671	1.6640390514199	NA	0.000137529841314422	4.8224	1.30133101587156
GAH1_2014	PHG39/PHM49	87.1987	0.0268790169522702	15.55	1.36527277762393	1.1405807e-16	170.741740583623	225.6147	0.0133448007568905	67.9098	1.23803355902267	69.7959	1.379992743824	893.9501	0.000137529841314422	6.1313	1.33165622284224
GAH1_2014	PHG39/PHN82	72.2373	0.0290325393289562	15.95	1.36527277762393	1.1405807e-16	170.741740583623	184.6751	0.0147657421014239	66.856	1.34707094495143	67.9326	1.81288960717702	686.0697	0.000137529841314422	4.592	1.41915565110003
GAH1_2014	PHN11_LH145_0028/LH195	64.3949	0.0284174178514225	NA	1.36776516200498	1.5308935e-16	170.741740583623	181.5286	0.0143273611949879	66.8678	1.31680894907271	68.8642	1.68432336158844	NA	0.000138428591489959	NA	1.30997575813017
GAH1_2014	PHN11_OH43_0045/PB80	84.8674	0.0296858819468416	15.85	1.36942675159236	2.0426369e-16	170.741740583623	202.0566	0.0151454022397923	68.4517	1.38021783926994	68.06	1.88531943665688	NA	0.000138709450919815	NA	1.42720578145726
GAH1_2014	PHN11_OH43_0142/LH195	88.4947	0.0287494640082271	NA	1.36776516200498	0.0434783	170.741740583623	205.0866	0.0145414895130277	68.51	0.669414188990286	69.8255	1.75972162670273	NA	0.000138428591489959	3.6945	1.2870603302383
GAH1_2014	PHN11_OH43_0142/PB80	83.7507	0.0292905320263296	12.55	1.36942675159236	2.1033522e-16	170.741740583623	221.2431	0.0148841960645949	66.2555	1.35089785104504	66.7004	1.89415877832382	NA	0.000138709450919815	2.354	1.36092942414124
GAH1_2014	PHN11_PHG47_0172/LH195	72.8071	0.0296560216809419	15.75	1.36776516200498	0.0332109	170.741740583623	189.0214	0.0151302158342576	68.0968	1.37780394465705	69.564	1.90721989511527	852.7602	0.000138428591489959	3.0329	1.43585052371587
GAH1_2014	PHN11_PHG47_0251/LH195	78.2876	0.0288521833229221	NA	1.36776516200498	1.2533377e-16	170.741740583623	193.6131	0.0146331141597539	68.0915	1.34554018251398	68.1657	1.80075200369405	NA	6.92290759724758e-05	NA	1.36179847230481
GAH1_2014	PHN11_PHG47_0390/PB80	77.5591	0.0288294895208383	16.05	1.36942675159236	2.0426369e-16	170.741740583623	206.7017	0.0145840114485249	67.2165	1.3400647630262	66.8746	1.72604637356113	622.9977	0.000138709450919815	NA	1.3505465855555
GAH1_2014	PHN11_PHW65_0015/LH195	62.6072	0.0152394853045687	15.5	1.36776516200498	0.0084746	170.741740583623	181.363	0.00781948020983563	70.2071	1.29832204886665	70.5029	1.7093241861539	600.4719	0.000138428591489959	3.0827	1.30874079495037
GAH1_2014	PHN11_PHW65_0065/LH195	71.7071	0.0261372879473217	14.75	1.36776516200498	0.0454545	170.741740583623	191.3365	0.0129378050885595	68.5934	1.21884015307624	70.4233	1.33958903657772	NA	0.000138428591489959	6.607	1.20038421076705
GAH1_2014	PHN11_PHW65_0101/LH195	57.642	0.0292320059051662	16.4	1.36776516200498	1.1666015e-16	170.741740583623	174.2784	0.0148467362642759	69.6833	1.4161907565499	71.9136	2.0317622612883	819.937	0.000138428591489959	NA	1.46631294881764
GAH1_2014	PHN11_PHW65_0237/LH195	88.1718	0.0287172149210554	15.7	1.36776516200498	0.0446429	170.741740583623	223.827	0.0145055483532621	69.4931	1.33988813659111	69.3865	1.66776608727201	890.7322	0.000138428591489959	8.005	1.34551525408224
GAH1_2014	PHN11_PHW65_0237/PB80	110.6279	0.0296070508448664	15.4	1.36942675159236	0.2608696	170.741740583623	251.3977	0.0151003492367059	68.2511	1.37962908448631	70.3965	1.91282694020251	840.532	0.000138709450919815	7.0706	1.36664684626995
GAH1_2014	PHN11_PHW65_0275/LH195	74.7312	0.0285069986491216	15.9	1.36776516200498	0.0806452	170.741740583623	196.2567	0.0143830446819486	69.5693	1.26411539593759	71.1668	1.74702331871104	NA	0.000138428591489959	3.1885	1.28651145771395
GAH1_2014	PHN11_PHW65_0275/PB80	74.1361	0.0268527399182784	16	1.36942675159236	0.0076923	170.741740583623	222.9994	0.0141496802502315	69.1118	1.31168678245511	68.1818	1.61934760381279	763.9444	0.000138709450919815	2.7072	1.32269130494443
GAH1_2014	PHN11_PHW65_0294/LH195	72.159	0.0305410799622088	14.75	1.36776516200498	0.0390625	170.741740583623	192.009	0.0156576903198308	67.8776	1.41577862820135	68.6604	2.01200567301032	743.3495	0.000138428591489959	4.1019	1.4667246032109
GAH1_2014	PHN11_PHW65_0312/LH195	69.3615	0.0292702270455178	15.15	1.36776516200498	1.3704315e-16	170.741740583623	189.9295	0.0148386368479907	66.9627	1.35796290844863	66.9292	1.76555955011709	856.6218	0.000138428591489959	4.0164	1.35557791702877
GAH1_2014	PHN11_PHW65_0323/LH195	75.9837	0.0278691833695041	14.85	1.36776516200498	0.0140845	170.741740583623	199.1373	0.0139558004729047	68.6987	1.29202237268178	71.1771	1.59355519641149	889.445	0.000138428591489959	5.4843	1.21300827882724
GAH1_2014	PHN11_PHW65_0359/LH195	54.7139	0.0294923874238115	15.9	1.36776516200498	1.3877788e-16	170.741740583623	180.9987	0.0149834139140885	69.5997	1.36420370915514	71.2501	1.82858933342129	NA	0.000138428591489959	3.9014	1.42455289758953
GAH1_2014	PHN11_PHW65_0359/PB80	93.3674	0.0296882707681135	15.75	1.36942675159236	0.3545668	170.741740583623	223.112	0.0156824947822042	68.8897	1.41960553429497	71.617	2.0638543487582	887.5142	0.000138709450919815	3.2749	1.46686182134199
GAH1_2014	PHV63/PB80	94.9642	0.0528646147488214	16.775	2.67675159235669	0.0076554	340.155118481382	219.6833	0.0265503927963792	70.6663	2.36873712098911	71.0314	3.22527128203437	NA	0.0002690282263727	6.5238	2.36888807574441
GAH1_2014	PHW52/PHG35	77.922	0.0279217374374875	15.05	1.36527277762393	0.0181818	170.741740583623	205.0612	0.0140226206572575	68.2148	1.29013835737415	69.2086	1.63573996503842	864.3449	0.000137529841314422	6.1902	1.2795133330284
GAH1_2014	PHW52/PHM49	75.5865	0.0284508613492301	15.5	1.36527277762393	1.2793586e-16	170.741740583623	196.3106	0.0144002559415546	68.8082	1.32758316161319	72.0726	1.74751805798344	877.2167	0.000137529841314422	3.1338	1.35077528244065
GAH1_2014	PHW52/PHN82	77.2383	0.0304180556667021	15.75	1.36527277762393	0.4897759	170.741740583623	202.5472	0.0155923887760314	67.0341	1.41778039446571	69.0721	2.00435370559715	890.7322	0.000137529841314422	2.6384	1.46969766271783
GAH1_2014	PHW65_MOG_0012/LH195	81.1019	0.0290194008119604	14.95	1.36776516200498	1.5265567e-16	170.741740583623	200.6384	0.0146700677465551	69.7816	1.32934942596409	70.0892	1.79369372340776	888.1578	0.000138428591489959	4.4848	1.36500022869689
GAH1_2014	PHW65_MOG_0029/LH195	81.4405	0.0296333278788581	15.4	1.36776516200498	0.0441761	170.741740583623	204.3577	0.0151119921476159	69.6801	1.37703856343833	70.6479	1.93225370229889	NA	0.000138428591489959	6.845	1.39409047248776
GAH1_2014	PHW65_MOG_0029/PB80	93.2281	0.0306426048662678	14.85	1.36942675159236	0.0081967	170.741740583623	228.1715	0.0157326099204688	68.79	1.42455107447748	67.8714	2.05920379959761	884.9398	0.000138709450919815	5.098	1.47861684123862
GAH1_2014	PHW65_MOG_0176/LH195	79.4476	0.0273113936024978	14.35	1.36776516200498	0.0272727	170.741740583623	202.924	0.013620180910587	67.2722	1.27218133647336	69.3173	1.50562353639632	816.0754	0.000138428591489959	4.2671	1.23889676622604
GAH1_2014	PHW65_MOG_0176/PB80	74.3343	0.0294410277664641	NA	1.36942675159236	2.1120258e-16	170.741740583623	204.3826	0.0149910071168558	66.7847	1.36973800412128	68.3503	1.88113064415053	NA	0.000138709450919815	NA	1.37295888030005
GAH1_2014	PHW65_MOG_0311/PB80	90.9662	0.0295891346853265	15.95	1.36942675159236	2.3895816e-16	170.741740583623	238.4406	0.0150952871015277	68.1691	1.3735649102149	70.1591	1.9081104258056	837.9576	0.000138709450919815	2.6562	1.43484425742121
GAH1_2014	REDEAR-B/LH195	77.983	0.0304061115603422	16.1	1.36527277762393	0.0637109	170.741740583623	201.2967	0.0156020068328701	66.6101	1.41624963202826	69.1396	2.02582539001946	NA	NA	4.6945	1.46361432557289
GAH1_2014	TX205/PB80	94.3348	0.0305315246771209	14.75	1.36153420105234	0.3611111	170.741740583623	222.9319	0.0156607276009377	69.6446	1.39988224904327	69.6449	2.06246907879547	831.5217	0.000137473669428451	9.0235	1.47436307917486
GAH1_2014	TX303/LH195	105.1852	0.0279671250416551	15.65	1.36222653004708	0.0305111	170.741740583623	245.4952	0.0139477010566195	72.9734	1.21984103620842	74.0731	1.6346845212573	NA	0.000137831765201517	8.6007	1.30668252298404
GAH1_2014	TX303/PB80	112.4219	0.0143627878977537	16.5	1.36153420105234	0.2805578	170.741740583623	256.5779	0.0151150294287229	70.7892	1.35896379158081	71.3532	1.93670635575052	890.7322	0.000137473669428451	7.3588	1.39459360563509
GAH1_2014	W10004_0097/LH195	70.4443	0.0292284226732582	12.2	1.36222653004708	0.0288462	170.741740583623	179.744	0.0148593916022215	67.3731	1.34342066529291	68.7844	1.8396055278868	NA	0.000137831765201517	3.0613	1.42670264830993
GAH1_2014	W10004_0097/PB80	89.9392	0.0304514991645098	15.35	1.36153420105234	0.0090909	170.741740583623	212.4199	0.0156131435302622	65.9969	1.4	67.2801	2.03591807117649	893.3066	0.000137473669428451	5.9192	1.4705667108814
GAH1_2014	W10005_0111/PB80	76.6111	0.0284066681556986	15.9	1.36153420105234	0.0416667	170.741740583623	192.8032	0.0148214255883846	67.5109	1.3089785104504	68.4728	1.88624294996537	799.342	0.000137473669428451	3.8574	1.36522892558203
GAH1_2014	W10005_0346/LH195	82.9133	0.0273615588492092	16.4	1.36222653004708	0.015873	170.741740583623	201.7075	0.0137021875004746	69.9068	1.25475419487783	71.3775	1.56997262442693	883.0091	0.000137831765201517	6.9361	1.26661482870603
GAH1_2014	WF9/H95	75.196	0.0292415611902541	15.85	1.36527277762393	1.2793586e-16	170.741740583623	198.5888	0.0148922954808801	72.4032	1.36326170150132	72.2634	1.84043009334081	NA	0.000137529841314422	8.1804	1.42340941316379
GAH1_2014	Z013E0003/PB80	84.3867	0.0305040532324932	15.5	1.36444198283024	0.0424126	170.741740583623	216.7879	0.0155685967406936	72.0414	1.37674418604651	72.8596	2.02137273656783	888.1578	0.000138182839488836	6.345	1.46036682980378
GAH1_2014	Z013E0006/PB80	93.2169	0.0305363023196649	16.3	1.36444198283024	0.0393939	170.741740583623	204.5206	0.0156556654657595	73.844	1.4086546953194	74.2881	2.05686203370824	879.1475	0.000138182839488836	5.1937	1.47358550976536
GAH1_2014	Z013E0007/PB80	90.159	0.0286551055679841	16.05	1.36444198283024	0.1002714	170.741740583623	200.4474	0.0144701134070144	72.4716	1.32870179570209	73.9715	1.6777268379564	NA	0.000138182839488836	5.7234	1.38933357727668
GAH1_2014	Z013E0009/PB80	94.2958	0.0282597556474721	16.4	1.36444198283024	0.0564516	170.741740583623	215.5518	0.0142716777080272	74.2503	1.30844863114513	75.1215	1.71644843167651	NA	0.000138182839488836	5.2005	1.32150208114165
GAH1_2014	Z013E0012/LH195	72.3778	0.0304718041453216	15	1.36153420105234	0.0121951	170.741740583623	196.5857	0.0156516157576169	74.4217	1.39252281424787	74.1735	2.05300306738349	NA	0.000137831765201517	7.0437	1.45707359465764
GAH1_2014	Z013E0012/PB80	82.7401	0.0296966316425655	17.15	1.36444198283024	0.0256084	170.741740583623	203.9764	0.0151180667098298	74.2428	1.3649102148955	75.8229	1.91154061809426	NA	0.000138182839488836	4.4623	1.3978411014042
GAH1_2014	Z013E0021/LH195	85.5473	0.0284233899046024	15.4	1.36153420105234	2.5500435e-16	170.741740583623	212.6793	0.01433849789238	72.2794	1.30456284957315	73.7021	1.71110524753455	NA	0.000137831765201517	7.5208	1.32269130494443
GAH1_2014	Z013E0021/PB80	99.8479	0.0296297446469501	16.1	1.36444198283024	0.057377	170.741740583623	221.534	0.0151124983611337	71.9306	1.36544009420077	71.8391	1.88202117484086	857.2654	0.000138182839488836	5.8711	1.3953711750446
GAH1_2014	Z013E0022/LH195	72.4743	0.0303965562752543	15.35	1.36153420105234	0.0081967	170.741740583623	196.864	0.015605044113977	72.7503	1.39870473947601	73.3306	2.08654639005244	NA	0.000137831765201517	6.8223	1.47559804235466
GAH1_2014	Z013E0022/PB80	86.0566	0.0297551577637289	15.3	1.36444198283024	0.01	170.741740583623	210.5568	0.0151605886453271	73.8449	1.37627318221961	73.895	1.88324153171279	893.9501	0.000138182839488836	7.2628	1.41279787769291
GAH1_2014	Z013E0026/LH195	86.5588	0.0153218996384519	16.65	1.36153420105234	0.1269841	170.741740583623	201.5472	0.0156981874012567	71.8014	1.38433912275537	71.1452	2.08644744219796	NA	0.000137831765201517	6.3365	1.47875405936971
GAH1_2014	Z013E0026/PB80	98.9978	0.0291937847648146	16.9	1.36444198283024	0.4748244	170.741740583623	215.8306	0.014829018791152	71.7712	1.34289078598764	71.3768	1.89547808305023	896.5245	0.000138182839488836	4.7994	1.36152403604263
GAH1_2014	Z013E0027/LH195	84.1143	0.0288808491781858	15.7	1.36153420105234	0.0234375	170.741740583623	194.8733	0.0150882001122782	72.5652	1.31404180158964	73.0036	1.87535868597249	896.5245	0.000137831765201517	8.5603	1.43735992315785
GAH1_2014	Z013E0027/PB80	97.2594	0.0304718041453216	16.2	1.36444198283024	0.1140271	170.741740583623	213.1375	0.0155756837299432	71.1074	1.37609655578452	71.3033	2.07612388271381	NA	0.000138182839488836	6.1791	1.47665004802635
GAH1_2014	Z013E0032/LH195	82.029	0.0297563521743648	15.75	1.36153420105234	0.0078125	170.741740583623	197.8495	0.0150821255500643	72.3975	1.31786870768325	73.2835	1.92054487285201	NA	0.000137831765201517	5.367	1.38796139596579
GAH1_2014	Z013E0032/PB80	77.6831	0.0296524384490339	15.85	1.36444198283024	0.065931	170.741740583623	192.1405	0.0151028803042951	71.1144	1.36196644097733	71.2657	1.93594775553283	NA	0.000138182839488836	5.3289	1.39848145268261
GAH1_2014	Z013E0037/LH195	83.231	0.0296882707681135	16.35	1.36153420105234	0.0636731	170.741740583623	214.0999	0.0151332531153645	72.9136	1.36638210185458	74.0341	1.936805303605	892.0194	0.000137831765201517	6.1744	1.39139184924301
GAH1_2014	Z013E0037/PB80	92.9205	0.0305004700005853	16.1	1.36444198283024	0.1451613	170.741740583623	201.1354	0.015555941402748	71.4493	1.38404474536356	71.1593	2.01754675286124	NA	0.000138182839488836	6.3592	1.46910305081645
GAH1_2014	Z013E0042/PB80	83.4266	0.0305613849430206	18.1	1.36444198283024	0.0895722	170.741740583623	201.0038	0.0156536406116882	68.7209	1.40041212834854	70.559	2.05557571159999	NA	0.000138182839488836	6.8183	1.473036637241
GAH1_2014	Z013E0044/LH195	88.6926	0.0305088308750372	15.85	1.36153420105234	3.1875544e-16	170.741740583623	228.0744	0.0156506033305812	73.119	1.399352369738	72.975	2.06299680068604	892.0194	0.000137831765201517	7.1698	1.47450029730595
GAH1_2014	Z013E0044/PB80	86.4963	0.0296715490192097	15.85	1.36444198283024	0.0378788	170.741740583623	223.4196	0.0151362903964715	72.5349	1.37550780100088	72.8732	1.90243741548204	892.663	0.000138182839488836	5.3053	1.43049901660339
GAH1_2014	Z013E0046/LH195	93.2165	0.0305542184792047	16.35	1.36153420105234	2.9099986e-16	170.741740583623	221.6387	0.0156718642983299	73.2698	1.40153076243744	73.5719	2.06217223523203	NA	0.000137831765201517	8.2677	1.47239628596259
GAH1_2014	Z013E0046/PB80	101.1107	0.0304718041453216	15.85	1.36444198283024	0.0461976	170.741740583623	209.5787	0.0155787210110501	75.1202	1.34365616720636	74.8807	2.07902635311191	NA	0.000138182839488836	5.1612	1.47527786671546
GAH1_2014	Z013E0047/LH195	82.6295	0.0292105065137184	16.8	1.36153420105234	0.1154545	170.741740583623	204.2543	0.0148350933533659	72.1119	1.33835737415367	72.6283	1.86925690161285	NA	0.000137831765201517	7.3032	1.35928280656817
GAH1_2014	Z013E0058/PB80	94.0457	0.030627077528	16.35	1.36444198283024	0.1338308	170.741740583623	220.3308	0.0157012246823637	72.4428	1.41195172210774	71.5531	2.05607045087239	NA	0.000138182839488836	5.2019	1.47797648996021
GAH1_2014	Z013E0062/LH195	82.7347	0.0294422221771	14.8	1.36153420105234	3.083471e-16	170.741740583623	205.63	0.0149753144978033	73.4964	1.35566676479246	72.9771	1.86005475114615	NA	0.000137831765201517	6.7903	1.42930979280062
GAH1_2014	Z013E0062/PB80	94.3561	0.0279205430268515	15.8	1.36444198283024	0.0955882	170.741740583623	213.0172	0.0140585618170231	73.3473	1.30156020017663	73.7589	1.71935090207461	NA	0.000138182839488836	6.1314	1.31875771851987
GAH1_2014	Z013E0066/PB80	92.9625	0.0292320059051662	16.15	1.36444198283024	0.070013	170.741740583623	221.6708	0.0148523046129719	72.3156	1.34860170738887	73.2161	1.86493617863386	883.6527	0.000138182839488836	5.5388	1.36207290856699
GAH1_2014	Z013E0069/PB80	97.6712	0.0294661103898198	16.8	1.36444198283024	0.1547619	170.741740583623	212.7951	0.0149813890600172	72.4084	1.35684427435973	73.098	1.86223160394472	NA	0.000138182839488836	5.7798	1.43200841604537
GAH1_2014	Z013E0074/LH195	75.4918	0.0297706851019967	16	1.36153420105234	3.1875544e-16	170.741740583623	200.9752	0.0151656507805053	73.8361	1.37073888725346	75.0284	1.90669217322471	NA	0.000137831765201517	6.3162	1.39816127704341
GAH1_2014	Z013E0074/PB80	92.9863	0.0305613849430206	16.4	1.36444198283024	0.0362335	170.741740583623	206.92	0.0156678145901873	73.3208	1.40229614365617	74.3694	2.0826874237277	876.5731	0.000138182839488836	4.11	1.47838814435347
GAH1_2014	Z013E0078/PB80	86.9885	0.0296978260532014	16.8	1.36444198283024	0.0226177	170.741740583623	200.6423	0.0151266723396328	71.1259	1.36308507506623	70.8322	1.93413371153402	NA	0.000138182839488836	5.5251	1.39944197960024
GAH1_2014	Z013E0082/LH195	76.102	0.0297348527829171	16.15	1.36153420105234	0.069233	170.741740583623	204.6752	0.0156242802276543	72.4004	1.36014130114807	73.8148	2.05161779742076	888.1578	0.000137831765201517	6.9596	1.4788912775008
GAH1_2014	Z013E0087/PB80	81.4814	0.0296321334682221	16.3	1.36444198283024	0.0853365	170.741740583623	205.9734	0.0150942746744921	71.388	1.36449808654695	72.322	1.90019459744715	886.8706	0.000138182839488836	6.3103	1.43063623473448
GAH1_2014	Z013E0111/PB80	78.1754	0.0305757178706525	15.65	1.36444198283024	3.0097452e-16	170.741740583623	192.1916	0.0156870507038646	72.3796	1.41024433323521	73.7326	2.0864144595798	NA	0.000138182839488836	4.7545	1.48099528884417
GAH1_2014	Z022E0006/PB80	87.9699	0.0289214591398094	15.95	1.36326502353919	0.0153846	170.741740583623	214.3077	0.014647288138253	68.424	1.34424492198999	68.1449	1.72406741647152	850.8294	0.000138035388288162	5.7461	1.39431916937291
GAH1_2014	Z022E0009/PB80	89.1757	0.0153254828703599	14.557	0.681790916643589	0.1322136	85.3722415049064	213.8749	0.0078230237044604	68.4643	0.681424786576391	70.891	1.03720439328474	824.6831	6.90405209942424e-05	6.6422	0.72281937520011
GAH1_2014	Z022E0016/PB80	75.3425	0.0282633388793801	15.25	1.36326502353919	0.125817	170.741740583623	195.4325	0.0142757274161698	67.4171	1.3118634088902	69.7707	1.71704211880339	804.4908	0.000138035388288162	4.1258	1.31523578648859
GAH1_2014	Z022E0017/LH195	90.9774	0.0292881432050576	15.4	1.36222653004708	0.0446429	170.741740583623	224.9397	0.0148938141214335	70.8139	1.35078010008831	72.955	1.83855008410568	857.2654	0.000137831765201517	6.4491	1.42839500526003
GAH1_2014	Z022E0023/PB80	84.3082	0.030429999773062	16.45	1.36326502353919	0.0254237	170.741740583623	190.5445	0.0156171932384048	72.1778	1.40953782749485	71.1713	2.05570764207263	877.2167	0.000138035388288162	5.2299	1.46924026894754
GAH1_2014	Z022E0029/PB80	87.4978	0.0305793011025605	16.25	1.36326502353919	0.047619	170.741740583623	184.5612	0.0157007184688458	72.1885	1.41059758610539	74.1558	2.08714007717933	861.1269	0.000138035388288162	2.7055	1.48026345881169
GAH1_2014	Z022E0036/PB80	89.4408	0.0306533545619917	15.75	1.36326502353919	0.0147059	170.741740583623	200.8536	0.0156450349818851	69.95	1.36808949072711	70.2897	2.05135393647548	NA	0.000138035388288162	6.5774	1.41009925444815
GAH1_2014	Z022E0048/LH195	71.6849	0.0292105065137184	17.6	1.36222653004708	2.8969882e-16	170.741740583623	193.1777	0.014840661702062	71.7554	1.34159552546364	72.7769	1.8134832943039	NA	0.000137831765201517	5.5478	1.42642821204775
GAH1_2014	Z022E0050/PB80	98.5498	0.0297647130488168	15.2	1.36326502353919	0.0306122	170.741740583623	202.9008	0.0151732439832727	68.9305	1.37385928760671	68.5745	1.88472574953	854.0474	0.000138035388288162	5.9463	1.42725152083429
GAH1_2014	Z022E0051/PB80	78.9367	0.0294314724813762	16.05	1.36326502353919	0.0166667	170.741740583623	189.8031	0.0156384542061534	71.2676	1.40506329113924	72.0482	2.03545631452225	NA	0.000138035388288162	5.8238	1.47212184970041
GAH1_2014	Z022E0059/PB80	90.6921	0.0305422743728448	18	1.36326502353919	0.1	170.741740583623	209.4016	0.015662752455009	70.4793	1.39976449808655	71.316	2.0867442857614	873.3552	0.000138035388288162	5.677	1.46045830855784
GAH1_2014	Z022E0060/LH195	82.1818	0.0282979767878237	17.35	1.36222653004708	0.0092593	170.741740583623	200.6183	0.0142919262487402	69.7411	1.30297321165734	71.3275	1.72043932847389	872.068	0.000137831765201517	5.544	1.34825961670402
GAH1_2014	Z022E0060/PB80	90.0489	0.0152550126428366	15.457	0.681790916643589	0.1332106	85.3722415049064	183.3113	0.00783719768295949	71.8157	0.708507506623491	71.554	1.0437019690623	822.1088	6.90405209942424e-05	4.9139	0.74015459909436
GAH1_2014	Z022E0072/PB80	96.4552	0.0152490405896566	15.55	1.36326502353919	0.015625	170.741740583623	213.1774	0.0146285582380935	68.4381	1.33146894318516	70.2585	1.7962333850061	845.0371	0.000138035388288162	5.3712	1.36349082925491
GAH1_2014	Z022E0077/LH195	72.7888	0.0276900217741059	15.25	1.36222653004708	0.0819672	170.741740583623	197.1919	0.0139325146510847	71.6648	1.26111274654107	72.7267	1.68442230944292	NA	0.000137831765201517	5.2282	1.31189681196542
GAH1_2014	Z022E0083/PB80	105.9422	0.0292236450307143	15.6	1.36326502353919	0.0185185	170.741740583623	226.2443	0.0148639475238819	69.9093	1.34889608478069	69.7497	1.8960058049408	861.1269	0.000138035388288162	5.8377	1.35283355440699
GAH1_2014	Z022E0094/PB80	98.4536	0.029639299932038	14.95	1.36326502353919	0.0235588	170.741740583623	212.6485	0.0151413525316497	71.3393	1.35925816897262	72.4704	1.90771463438768	858.5526	0.000138035388288162	5.1242	1.42610803640854
GAH1_2014	Z022E0097/LH195	82.5214	0.0270963996880199	16.15	1.36222653004708	2.7755576e-16	170.741740583623	209.2855	0.0141238633608224	71.6801	1.26658816602885	72.6659	1.6174346119595	859.8397	0.000137831765201517	6.934	1.37995700498559
GAH1_2014	Z022E0108/LH195	90.1132	0.0293012817220535	15.6	1.36222653004708	0.0833333	170.741740583623	209.9791	0.0148938141214335	72.6975	1.35266411539594	73.0311	1.81417592928527	859.8397	0.000137831765201517	5.6141	1.42793761148973
GAH1_2014	Z022E0108/PB80	85.0573	0.0268073523141109	15.9	1.36326502353919	0.0480769	170.741740583623	208.6202	0.0135098263637013	70.204	1.25063291139241	70.6833	1.55496553316402	858.5526	0.000138035388288162	5.976	1.161780176554
GAH1_2014	Z022E0110/LH195	79.2278	0.0292833655625137	15.85	1.36222653004708	2.8969882e-16	170.741740583623	193.4771	0.0148877395592196	70.5062	1.30550485722696	71.6852	1.83973745835944	883.6527	0.000137831765201517	5.9159	1.41979600237845
GAH1_2014	Z022E0110/PB80	96.0819	0.0297611298169088	15.25	1.36326502353919	3.512815e-16	170.741740583623	196.3827	0.0151676756345766	70.5818	1.37968795996467	72.1199	1.85454665391339	875.9296	0.000138035388288162	4.8453	1.42903535653844
GAH1_2014	Z022E0121/LH195	88.5042	0.0284150290301505	15.4	1.36222653004708	0.0338983	170.741740583623	229.6668	0.01433849789238	71.3562	1.25828672357963	72.6296	1.68960058049408	889.445	0.000137831765201517	6.7626	1.34935736175273
GAH1_2014	Z022E0121/PB80	93.8481	0.0293968345729325	15.5	1.36326502353919	0.1052632	170.741740583623	216.5746	0.0149378546974843	69.8732	1.35972917279953	68.9169	1.85019294831624	846.3243	0.000138035388288162	6.0351	1.36586927686045
GAH1_2014	Z022E0123/PB80	95.7982	0.029645271985218	15.1	1.36326502353919	0.0517998	170.741740583623	213.7778	0.0150573210876909	67.7425	1.34065351780983	71.4941	1.90801147795112	875.9296	0.000138035388288162	4.7306	1.36728719754837
GAH1_2014	Z022E0147/LH195	73.3092	0.0291698965520948	15.35	1.36222653004708	0.171875	170.741740583623	201.6059	0.0148371182074372	70.6278	0.644921989991169	74.3741	1.83957254526864	NA	0.000137831765201517	5.8044	1.42546768513013
GAH1_2014	Z022E0147/PB80	94.4667	0.0282824494495559	16.05	1.36326502353919	0.042576	170.741740583623	221.446	0.0142909138217045	72.384	1.31156903149838	72.5853	1.74576997922095	870.1372	0.000138035388288162	7.5037	1.32127338425651
GAH1_2014	Z022E0155/LH195	85.2447	0.0292128953349904	16.3	1.36222653004708	0.0554559	170.741740583623	200.0423	0.014857872961668	71.9531	1.34477480129526	71.0544	1.83977044097761	892.0194	0.000137831765201517	5.5467	1.42629099391666
GAH1_2014	Z022E0155/PB80	96.5567	0.0296679657873017	15.5	1.36326502353919	0.0403846	170.741740583623	213.2815	0.0150861752582069	70.9504	1.34977921695614	70.8304	1.87285200699232	859.8397	0.000138035388288162	6.3665	1.43456982115904
GAH1_2015	(LAMA2002-35-2-B-B-B-B/CG44)-1-3-B-1-1-B24-B5-B16/LH195	78.1813	0.0196319753457151	15.1941	19.0593209529625	0.0942029	123.497193526277	169.972	0.0220504154178615	63	1.60640529202969	65.5	1.14898159367607	NA	NA	9.3609	1.8671212011315
GAH1_2015	(LAMA2002-35-2-B-B-B-B/CG44)-1-3-B-1-1-B24-B5-B16/TX777	82.3966	0.0186264517909846	15.4499	16.9391970325411	0.0151515	123.497193526277	163.2862	0.0212613864534326	65	1.60640529202969	68	1.14898159367607	NA	NA	9.5446	1.75759773699862
GAH1_2015	(TX739)_LAMA2002-10-1/LH195	88.6263	0.0186264517909846	16.5228	18.1314541141801	0.030303	123.497193526277	189.2586	0.0217395144527731	65	1.60640529202969	68	1.14898159367607	NA	NA	9.373	1.83535214332342
GAH1_2015	2369/PHZ51	99.7145	0.0196319753457151	13.7658	17.735226034007	0.130124	123.497193526277	195.3811	0.0215628661771547	59.5	1.60640529202969	61	1.14898159367607	NA	NA	10.8782	1.77319213752085
GAH1_2015	B104/LH82	58.7532	0.0176216865496437	14.0991	16.986001251209	0.1817132	123.497193526277	159.883	0.0213885732118778	56.5	1.60640529202969	59.5	1.14898159367607	NA	NA	7.9843	1.79632987597012
GAH1_2015	B104/PHZ51	89.0982	0.0196319753457151	13.2627	19.4298245770739	0.2904427	123.497193526277	188.571	0.0223177431416307	59.5	1.60640529202969	62	1.14898159367607	NA	NA	7.5641	1.88779284833539
GAH1_2015	B106/LH82	68.8917	0.0196319753457151	13.725	18.0932247141995	0.2858533	123.497193526277	158.5476	0.0218690565215599	54	1.60640529202969	56	1.14898159367607	NA	NA	8.1893	1.80895046057881
GAH1_2015	B106/PHZ51	102.5685	0.0186264517909846	13.7676	18.1303822618442	0.5345238	123.497193526277	214.5136	0.0218667012112183	56.5	1.60640529202969	59.5	1.14898159367607	NA	NA	7.4427	1.84180749981867
GAH1_2015	B119/LH82	68.0528	0.0196319753457151	13.7401	19.3008450126532	0.425	123.497193526277	152.8452	0.0222871241071902	54	1.60640529202969	54	1.14898159367607	NA	NA	6.8378	1.88510916080366
GAH1_2015	B119/PHZ51	112.8293	0.0196319753457151	13.4646	16.553687475727	0.6911765	123.497193526277	191.3141	0.0211212454881086	59.5	1.60640529202969	59.5	1.14898159367607	NA	NA	5.591	1.697033437296
GAH1_2015	B14A/C103	111.7875	0.0196319753457151	13.5463	19.3551521976724	0.1483078	123.497193526277	215.0863	0.0221634703142573	61	1.60640529202969	65	1.14898159367607	NA	NA	5.5032	1.87502719953579
GAH1_2015	B14A/H95	87.8701	0.0196319753457151	14.1771	19.3787329490624	0.1096459	123.497193526277	173.3553	0.0222305966589923	61	1.60640529202969	63	1.14898159367607	NA	NA	8.6516	1.88053963879016
GAH1_2015	B14A/OH43	74.6233	0.0196319753457151	13.9913	17.6998549069221	0.043798	123.497193526277	178.7014	0.0215075163841276	58	1.60640529202969	60.5	1.14898159367607	NA	NA	7.8517	1.77145136723
GAH1_2015	B37/C103	97.6951	0.0196319753457151	13.9326	17.6323282097601	0.1905551	123.497193526277	203.9181	0.0215711097633502	61	1.60640529202969	65	1.14898159367607	NA	NA	5.9829	1.77253934866178
GAH1_2015	B37/H95	95.373	0.0196319753457151	15.0562	17.6994976228102	0.1311102	123.497193526277	177.9333	0.0215016281082736	61	1.60640529202969	63	1.14898159367607	NA	NA	7.0618	1.76709944150287
GAH1_2015	B37/OH43	89.8332	0.0196319753457151	14.5365	19.280122534159	0.6051857	123.497193526277	192.536	0.0222317743141631	58.5	1.60640529202969	60.5	1.14898159367607	NA	NA	8.0544	1.87959672154929
GAH1_2015	B37/PHZ51	90.1189	0.0196319753457151	13.8661	19.3587250387921	0.376612	123.497193526277	205.6215	0.0221917340383562	59.5	1.60640529202969	62	1.14898159367607	NA	NA	7.6733	1.8833683905128
GAH1_2015	B47/PHZ51	86.8475	0.0368828466477998	13.5145	35.0931600457752	0.2127413	246.994387052554	187.1313	0.0430762708371362	56	3.19885446918361	58	2.2879810743754	NA	NA	7.7338	3.64749401610213
GAH1_2015	B73/MO17	81.2476	0.0196319753457151	13.9753	18.2082701982534	0.0855721	123.497193526277	189.4408	0.0217877983147754	58	1.60640529202969	63	1.14898159367607	NA	NA	10.8863	1.80459853485167
GAH1_2015	B73/PHG35	87.6998	0.0196319753457151	13.5663	18.1035859534466	0.4341346	123.497193526277	175.446	0.0217877983147754	59.5	1.60640529202969	62	1.14898159367607	NA	NA	8.0332	1.80358308551534
GAH1_2015	B73/PHM49	95.7375	0.0196319753457151	13.4989	19.3530084930006	0.0380131	123.497193526277	186.3113	0.0221670032797696	60.5	1.60640529202969	62	1.14898159367607	NA	NA	9.4748	1.87546239210851
GAH1_2015	B73/PHN82	111.7392	0.0196319753457151	13.81	17.7195055330804	0.066396	123.497193526277	185.592	0.021566399142667	61	1.60640529202969	63	1.14898159367607	NA	NA	9.7532	1.77210415608907
GAH1_2015	B73/PHZ51	96.1249	0.0196319753457151	13.439	19.3683717098153	0.1020924	123.497193526277	215.0242	0.0221917340383562	57	1.60640529202969	59.5	1.14898159367607	NA	NA	10.362	1.87974178574019
GAH1_2015	B73/TX205	92.6994	0.0196319753457151	13.3546	17.7366551704549	0.1069263	123.497193526277	201.6558	0.0215769980392041	63	1.60640529202969	65	1.14898159367607	NA	NA	10.5837	1.77362733009357
GAH1_2015	B73_PHG39-1/LH82	66.1706	0.00981560851616269	13.8661	9.54305863068006	1.3104003e-08	61.7485905882789	165.6215	0.0111064199871636	54.4295	0.803131090674411	55.5019	0.574440540072702	NA	NA	5.9338	0.94066874592007
GAH1_2015	B73_PHG39-1/PHZ51	116.0902	0.00981560851616269	13.9355	8.51015026297897	0.0746269	61.7485905882789	208.0356	0.0106550777546827	58.4295	0.803131090674411	61.5019	0.574440540072702	NA	NA	7.9572	0.86581562341336
GAH1_2015	B73_PHG39-10/LH82	66.0902	0.00981560851616269	14.0229	9.55913641571864	0.0645161	61.7485905882789	169.4687	0.0110844932255386	54.4295	0.803131090674411	54.5019	0.574440540072702	NA	NA	8.8411	0.94066874592007
GAH1_2015	B73_PHG39-10/PHZ51	106.0902	0.00869330469941974	13.618	8.07283450992946	0.3478261	61.7485905882789	207.8082	0.0105557460739921	56.4295	0.803131090674411	61.5019	0.574440540072702	NA	NA	6.3403	0.889170958148981
GAH1_2015	B73_PHG39-11/LH82	56.0902	0.00766275680282942	13.6836	6.65370201719037	0.1147541	61.7485905882789	152.0485	0.00981986233211053	54.4295	0.803131090674411	55.5019	0.574440540072702	NA	NA	7.2434	0.833248712555306
GAH1_2015	B73_PHG39-11/PHZ51	96.0902	0.00869330469941974	13.7198	8.19431110799877	0.2794118	61.7485905882789	193.671	0.0105837742670569	58.4295	0.803131090674411	61.5019	0.574440540072702	NA	NA	9.9801	0.891491985203453
GAH1_2015	B73_PHG39-13/LH82	66.0902	0.00881084327482187	13.4704	8.39867762004478	0.0166667	61.7485905882789	166.7243	0.0106877482644307	54.4295	0.803131090674411	54.5019	0.574440540072702	NA	NA	8.9066	0.897874809603249
GAH1_2015	B73_PHG39-13/PHZ51	86.0902	0.00981560851616269	13.078	9.70883845863347	0.0857143	61.7485905882789	197.2116	0.0111578776298512	56.4295	0.803131090674411	58.5019	0.574440540072702	NA	NA	9.8904	0.943715093929063
GAH1_2015	B73_PHG39-2/LH82	76.0902	0.00981560851616269	14.5155	9.71491228853693	0.0322581	61.7485905882789	164.8059	0.0111591565633667	55.4295	0.803131090674411	58.5019	0.574440540072702	NA	NA	8.5208	0.94393269021542
GAH1_2015	B73_PHG39-2/PHZ51	86.0902	0.00867283023789808	13.7979	8.02174288191796	0.1060606	61.7485905882789	196.4799	0.0104205854123854	56.4295	0.803131090674411	58.5019	0.574440540072702	NA	NA	8.636	0.886342206426344
GAH1_2015	B73_PHG39-20/LH82	56.0902	0.00981560851616269	13.3802	8.5155095246585	0.0545455	61.7485905882789	146.5936	0.0106599450035035	54.4295	0.803131090674411	54.5019	0.574440540072702	NA	NA	7.757	0.866033219699717
GAH1_2015	B73_PHG39-20/PHZ51	86.0902	0.00869330469941974	13.6373	7.29038230471833	0.057971	61.7485905882789	198.0901	0.0101298199954071	54.4295	0.803131090674411	56.5019	0.574440540072702	NA	NA	10.1645	0.818524697178502
GAH1_2015	B73_PHG39-21/LH82	66.0902	0.00981560851616269	14.0488	9.57807247365298	0.0483871	61.7485905882789	178.2513	0.0110889153207049	55.4295	0.803131090674411	58.5019	0.574440540072702	NA	NA	8.1238	0.940886342206426
GAH1_2015	B73_PHG39-21/PHZ51	86.1191	0.00881084327482187	13.5103	8.52122607044999	1.3104003e-08	61.7485905882789	212.0718	0.0107087776528155	61.4295	0.803131090674411	61.5019	0.574440540072702	NA	NA	11.6569	0.89918038732139
GAH1_2015	B73_PHG39-23/LH82	66.6231	0.00867283023789808	14.1975	8.02102831369402	0.0185185	61.7485905882789	174.6903	0.0104130778606716	54.4295	0.803131090674411	54.5019	0.574440540072702	NA	NA	9.1696	0.886197142235439
GAH1_2015	B73_PHG39-23/PHZ51	96.3141	0.00981560851616269	13.4341	8.49442976205235	0.0285714	61.7485905882789	212.2816	0.0106832602205748	56.4295	0.803131090674411	58.5019	0.574440540072702	NA	NA	11.8015	0.866033219699717
GAH1_2015	B73_PHG39-24/LH82	66.0902	0.00981560851616269	14.0961	9.60951347550621	1.3104003e-08	61.7485905882789	169.8417	0.011151394638136	54.4295	0.803131090674411	55.5019	0.574440540072702	NA	NA	8.4876	0.942844708783637
GAH1_2015	B73_PHG39-24/PHZ51	97.8258	0.00881084327482187	13.6495	8.31292943317233	1.3104003e-08	61.7485905882789	215.335	0.0107089684329531	56.4295	0.803131090674411	58.5019	0.574440540072702	NA	NA	10.6773	0.896714296076014
GAH1_2015	B73_PHG39-25/LH82	86.0902	0.00981560851616269	13.1964	9.68311400257173	0.2794118	61.7485905882789	161.4896	0.0110898480236002	55.4295	0.803131090674411	58.5019	0.574440540072702	NA	NA	7.8552	0.941684195256401
GAH1_2015	B73_PHG39-25/PHZ51	116.0902	0.00981560851616269	13.6494	9.714197720313	0.1694915	61.7485905882789	198.2414	0.0111516937625494	61.4295	0.803131090674411	61.5019	0.574440540072702	NA	NA	8.7527	0.943860158119968
GAH1_2015	B73_PHG39-4/LH82	66.7136	0.00981560851616269	13.8964	8.18680814164743	0.0151515	61.7485905882789	160.4091	0.0105150298241172	54.4295	0.803131090674411	54.5019	0.574440540072702	NA	NA	9.5893	0.842750417059549
GAH1_2015	B73_PHG39-4/PHZ51	86.0902	0.00981560851616269	13.8885	9.67025177454086	0.1594203	61.7485905882789	211.2976	0.0110746727590694	58.4295	0.803131090674411	58.5019	0.574440540072702	NA	NA	9.512	0.941466598970044
GAH1_2015	B73_PHG39-6/LH82	56.0939	0.00881084327482187	13.1606	8.40689515462006	0.0461539	61.7485905882789	152.1446	0.0107024053606863	54.4295	0.803131090674411	56.5019	0.574440540072702	NA	NA	8.694	0.898237470080511
GAH1_2015	B73_PHG39-6/PHZ51	86.0902	0.00869330469941974	13.687	8.19931308556633	0.0294118	61.7485905882789	200.1568	0.0105802471898203	56.4295	0.803131090674411	58.5019	0.574440540072702	NA	NA	9.8223	0.891419453108
GAH1_2015	B73_PHG39-7/LH82	66.0915	0.00981560851616269	13.781	8.48728407981298	0.0363636	61.7485905882789	178.6124	0.0105934098416643	54.4295	0.803131090674411	54.5019	0.574440540072702	NA	NA	8.8938	0.864002321027054
GAH1_2015	B73_PHG39-7/PHZ51	66.0907	0.00867283023789808	13.8511	7.89097689693747	1.3104003e-08	61.7485905882789	178.323	0.0104062615925431	54.4295	0.803131090674411	55.5019	0.574440540072702	NA	NA	10.4687	0.884819032421847
GAH1_2015	B97/B47	80.1847	0.0196319753457151	13.5111	19.3233539117072	0.078125	123.497193526277	163.8205	0.022109298176401	54	1.60640529202969	55	1.14898159367607	NA	NA	7.4771	1.87466453905853
GAH1_2015	B97/LH195	77.8216	0.0186264517909846	13.0672	18.2071983459175	0.0373134	123.497193526277	188.2167	0.0218078184526789	61	1.60640529202969	63	1.14898159367607	NA	NA	8.2492	1.84021179371872
GAH1_2015	B97/LH82	74.0014	0.0196319753457151	13.2113	19.2522543734255	0.2169833	123.497193526277	161.452	0.0221917340383562	54	1.60640529202969	56.5	1.14898159367607	NA	NA	8.0821	1.87945165735838
GAH1_2015	BSSSC0_012/PHZ51	103.1718	0.00981560851616269	13.6607	9.58629000822825	0.3142857	61.7485905882789	207.3528	0.0111096832696418	60.5705	0.803297838012262	62.4981	0.574559633027523	NA	NA	7.1125	0.941249002683688
GAH1_2015	BSSSC0_029/PHZ51	110.9477	0.00981560851616269	13.7586	9.57521420075723	0.1971831	61.7485905882789	219.6013	0.0111114415088118	60.5705	0.803297838012262	62.4981	0.574559633027523	NA	NA	9.5983	0.941249002683688
GAH1_2015	BSSSC0_044/LH82	49.1926	0.00981560851616269	13.7484	9.70883845863347	0.112676	61.7485905882789	152.3449	0.0111585229848848	53.5705	0.803297838012262	55.4981	0.574559633027523	NA	NA	7.3611	0.943570029738159
GAH1_2015	BSSSC0_052/PHZ51	72.2252	0.00981560851616269	13.039	9.57307049608542	0.2647059	61.7485905882789	188.3725	0.0110858545949161	57.5705	0.803297838012262	60.4981	0.574559633027523	NA	NA	6.5551	0.940813810110974
GAH1_2015	CG44/CGR03	75.8202	0.0196319753457151	13.714	17.6741304508604	0.0072464	123.497193526277	163.7329	0.0214274358325139	52.5	1.60640529202969	54	1.14898159367607	NA	NA	6.9494	1.76528613911656
GAH1_2015	CG60/LH162	59.3776	0.0196319753457151	13.7073	19.2733341360316	0.3839034	123.497193526277	146.2929	0.0222329519693339	49	1.60640529202969	48	1.14898159367607	NA	NA	NA	1.87937912526293
GAH1_2015	CGR01/LH198	66.1134	0.0196319753457151	13.8455	17.0167276848383	0.0991952	123.497193526277	183.324	0.0213238021774844	55	1.60640529202969	56.5	1.14898159367607	NA	NA	8.4989	1.72662653224052
GAH1_2015	CML103/LH195	106.5227	0.0196319753457151	13.0256	19.2426077024023	0.5978261	123.497193526277	199.4802	0.0221917340383562	63	1.60640529202969	64	1.14898159367607	NA	NA	6.8962	1.87691303401755
GAH1_2015	DKFBHJ/PHZ51	80.242	0.0196319753457151	13.3891	18.1232365796049	0.1488934	123.497193526277	201.3195	0.0218678788663891	54	1.60640529202969	54.5	1.14898159367607	NA	NA	8.0299	1.80989337781969
GAH1_2015	F42/MO17	79.4327	0.0196319753457151	13.5697	17.7155754078487	0.0671642	123.497193526277	188.2531	0.0215039834186152	59.5	1.60640529202969	63	1.14898159367607	NA	NA	8.6518	1.77188655980271
GAH1_2015	F42/OH43	79.5436	0.0186264517909846	13.8109	18.2018390842379	0.0485893	123.497193526277	189.8354	0.0217983972113126	58	1.60640529202969	62	1.14898159367607	NA	NA	9.824	1.83702038151882
GAH1_2015	GEMN-0145/B47	93.9482	0.0184891970674505	14.2954	14.8297916354787	0.0149287	123.497193526277	192.0147	0.0201261268687916	61	1.60640529202969	63	1.14898159367607	NA	NA	11.0389	1.62667730470733
GAH1_2015	GEMN-0155/B47	70.2517	0.0176216865496437	14.3016	15.2642491156325	0.1136364	123.497193526277	160.212	0.0204970882475902	55	1.60640529202969	55.5	1.14898159367607	NA	NA	8.018	1.67585406542395
GAH1_2015	GEMN-0156/B47	90.4886	0.0196319753457151	13.5789	17.5394343406482	0.0536165	123.497193526277	186.8414	0.0214969174875905	59.5	1.60640529202969	60.5	1.14898159367607	NA	NA	8.6648	1.76869514760281
GAH1_2015	GEMN-0178/B47	95.0387	0.0176216865496437	13.5858	16.9656360568268	0.4096334	123.497193526277	194.72	0.0213108479706057	56	1.60640529202969	58	1.14898159367607	NA	NA	8.9297	1.7910350330021
GAH1_2015	GEMS-0113/PHZ51	107.7008	0.0196319753457151	13.9372	19.2640447491205	0.5195652	123.497193526277	200.2036	0.0222141094866012	58.5	1.60640529202969	59.5	1.14898159367607	NA	NA	7.4756	1.88264306955828
GAH1_2015	GEMS-0115/PHZ51	100.6458	0.0196319753457151	13.6397	19.0964785006072	0.1694805	123.497193526277	204.6743	0.0221634703142573	61	1.60640529202969	61	1.14898159367607	NA	NA	10.6702	1.87640530934939
GAH1_2015	GEMS-0142/PHZ51	104.6779	0.0196319753457151	13.3379	18.2204178580603	0.0733475	123.497193526277	214.0391	0.0218160620388744	61	1.60640529202969	61	1.14898159367607	NA	NA	10.523	1.8069920940016
GAH1_2015	GEMS-0146/LH82	85.6505	0.0196319753457151	13.5011	19.2729768519197	0.13125	123.497193526277	171.7439	0.0222553274175789	56	1.60640529202969	58	1.14898159367607	NA	NA	7.9441	1.88394864727642
GAH1_2015	GEMS-0146/PHZ51	108.4508	0.0196319753457151	13.6188	18.2143440281568	0.2357143	123.497193526277	224.6197	0.0218042854871665	61	1.60640529202969	63	1.14898159367607	NA	NA	8.7133	1.80655690142888
GAH1_2015	GEMS-0150/LH82	76.0692	0.0196319753457151	12.6634	19.2847672276146	0.3359375	123.497193526277	163.4118	0.0222341296245046	56.5	1.60640529202969	59.5	1.14898159367607	NA	NA	7.4765	1.88344092260825
GAH1_2015	GEMS-0150/PHZ51	96.7883	0.0184884387540608	13.2624	16.156387543218	0.05	123.497193526277	215.0497	0.0206560716956468	61	1.60640529202969	62	1.14898159367607	NA	NA	9.9534	1.70609994922753
GAH1_2015	GEMS-0162/LH82	77.1855	0.0186264517909846	13.4088	18.1843321627515	0.0160354	123.497193526277	164.8233	0.0218231279698991	54	1.60640529202969	56	1.14898159367607	NA	NA	8.2761	1.84122724305505
GAH1_2015	GEMS-0162/PHZ51	100.3234	0.0184891970674505	13.6874	17.5930269574435	0.1758893	123.497193526277	218.3857	0.0214910292117365	59.5	1.60640529202969	60.5	1.14898159367607	NA	NA	8.9359	1.82686588815551
GAH1_2015	GEMS-0163/LH82	97.9398	0.0196319753457151	13.4742	19.3001304444293	0.0869565	123.497193526277	175.3218	0.0222847687968486	59.5	1.60640529202969	60.5	1.14898159367607	NA	NA	10.6255	1.88431130775368
GAH1_2015	GEMS-0163/PHZ51	120.4878	0.0196319753457151	13.6392	17.7116452826171	0.3065392	123.497193526277	223.1254	0.0215251812116894	62	1.60640529202969	63	1.14898159367607	NA	NA	9.3829	1.7715964314209
GAH1_2015	GEMS-0182/LH82	90.5585	0.0186264517909846	14.0292	18.2039827889098	0.0256445	123.497193526277	167.4075	0.0217972195561418	57	1.60640529202969	58	1.14898159367607	NA	NA	9.2946	1.83789076666425
GAH1_2015	GEMS-0182/PHZ51	91.1283	0.0174836735127199	13.8234	16.4243506271944	0.0826746	123.497193526277	188.9811	0.0211330220398165	57	1.60640529202969	59.5	1.14898159367607	NA	NA	10.1821	1.78443461231595
GAH1_2015	GEMS-0219/LH82	76.4191	0.0196319753457151	13.7972	18.0885800207439	0.031746	123.497193526277	164.294	0.0217630675561889	54	1.60640529202969	54	1.14898159367607	NA	NA	9.209	1.80372814970624
GAH1_2015	GEMS-0219/PHZ51	85.0807	0.0184884387540608	12.5454	17.5948133780034	0.0496982	123.497193526277	197.6056	0.0215134046599815	58.5	1.60640529202969	60.5	1.14898159367607	NA	NA	10.2414	1.82701095234641
GAH1_2015	GT601/B47	74.5981	0.0176216865496437	14.0361	15.8923545844732	0.9310303	123.497193526277	174.1017	0.0206478281094513	58	1.60640529202969	61	1.14898159367607	NA	NA	4.2339	1.70892870095017
GAH1_2015	GT601/PHZ51	98.0851	0.0184884387540608	13.8747	16.1363796329477	0.6405462	123.497193526277	204.1673	0.0208598060401934	58	1.60640529202969	61	1.14898159367607	NA	NA	6.5128	1.72227460651338
GAH1_2015	GT602/B47	78.7942	0.0196115008841934	13.9206	19.1757955734642	0.3318614	123.497193526277	178.6447	0.022058659004057	61	1.60640529202969	63	1.14898159367607	NA	NA	6.0106	1.87800101544934
GAH1_2015	GT602/PHZ51	81.6679	0.0186264517909846	13.5636	18.031057278717	0.2369565	123.497193526277	192.7856	0.0218254832802407	57	1.60640529202969	59.5	1.14898159367607	NA	NA	7.8378	1.8394864727642
GAH1_2015	H95/B47	71.4823	0.0196319753457151	14.6285	19.1046960351825	0.0812332	123.497193526277	165.1393	0.0222011552797225	58	1.60640529202969	58	1.14898159367607	NA	NA	7.8351	1.87611518096758
GAH1_2015	KY21/B47	89.0414	0.0196319753457151	13.636	18.0721449515934	0.720351	123.497193526277	192.0048	0.0217501133493102	61	1.60640529202969	63	1.14898159367607	NA	NA	4.1813	1.8024225719881
GAH1_2015	KY21/LH195	103.6265	0.0196319753457151	13.8764	19.3622978799118	0.862553	123.497193526277	203.4365	0.0221752468659652	66.5	1.60640529202969	66.5	1.14898159367607	NA	NA	5.4741	1.87981431783564
GAH1_2015	LAMA2002-12-1-B-B-B-B-B-B-1-B28-B14/LH195	88.0971	0.0186264517909846	14.6555	18.0285562899332	0.0598146	123.497193526277	196.9462	0.021633525487402	65	1.60640529202969	66.5	1.14898159367607	NA	NA	10.4948	1.83179807064626
GAH1_2015	LAMA2002-58-3-B-B-B-B-B-B-1-B19-B18-B22/LH195	91.6165	0.0196319753457151	16.6273	19.2658311696803	0	123.497193526277	178.3508	0.0222117541762596	65	1.60640529202969	68	1.14898159367607	NA	NA	10.3158	1.88046710669471
GAH1_2015	LH132/LH51	81.0116	0.0184884387540608	13.6683	17.678060576092	0.0163477	123.497193526277	181.972	0.0214286134876847	59.5	1.60640529202969	62	1.14898159367607	NA	NA	10.8776	1.8185246971785
GAH1_2015	LH132/LH82	64.0626	0.0196319753457151	13.9525	19.2147395416688	0	123.497193526277	164.4527	0.022310677210606	55	1.60640529202969	56.5	1.14898159367607	NA	NA	8.1512	1.88539928918546
GAH1_2015	LH195/LH198	85.0875	0.0173464187891858	13.2841	15.9430889283728	0.0163934	123.497193526277	181.4293	0.0207267310058942	65	1.60640529202969	68	1.14898159367607	NA	NA	5.5974	1.76855008341191
GAH1_2015	LH195/PHZ51	99.7147	0.0196319753457151	13.7256	17.7302240564395	0.0783702	123.497193526277	188.2288	0.0215781756943749	62	1.60640529202969	62	1.14898159367607	NA	NA	10.8049	1.77319213752085
GAH1_2015	LH195/TX777	85.672	0.0196319753457151	15.6587	16.4929491766924	0.0362319	123.497193526277	197.5007	0.0210906264536681	64	1.60640529202969	66.5	1.14898159367607	NA	NA	13.3384	1.69326176833249
GAH1_2015	LH198/PHZ51	91.6415	0.0184891970674505	13.3676	17.5251429761695	0.0722596	123.497193526277	197.3994	0.0214486336255881	59.5	1.60640529202969	60.5	1.14898159367607	NA	NA	9.0261	1.81881482556031
GAH1_2015	LH212HT/LH195	106.9643	0.0196319753457151	13.7616	17.6998549069221	0.0357143	123.497193526277	200.9412	0.0215075163841276	63	1.60640529202969	64	1.14898159367607	NA	NA	10.2313	1.76731703778922
GAH1_2015	LH216/LH195	90.5496	0.0184891970674505	13.8934	17.5701607742775	0	123.497193526277	188.6509	0.0214745420393455	64	1.60640529202969	66.5	1.14898159367607	NA	NA	10.6939	1.8249075215783
GAH1_2015	LH38/B47	55.0658	0.0184884387540608	14.0245	13.7100632285693	0.0073529	123.497193526277	159.8485	0.0194784165248574	54	1.60640529202969	54	1.14898159367607	NA	NA	8.5554	1.53274824109669
GAH1_2015	LH38/LH195	71.0519	0.0186264517909846	13.9531	18.2400684842186	0.0076923	123.497193526277	176.2245	0.0218619905905352	62	1.60640529202969	63	1.14898159367607	NA	NA	9.6087	1.8426778849641
GAH1_2015	LH74/PHG35	86.6606	0.0184884387540608	13.7324	16.0442003320599	0.282982	123.497193526277	164.6398	0.0208421412126315	57	1.60640529202969	58	1.14898159367607	NA	NA	8.5027	1.71603684630449
GAH1_2015	LH74/PHM49	81.8261	0.0196319753457151	13.7827	17.7373697386788	0.0087719	123.497193526277	162.8418	0.0215805310047165	57	1.60640529202969	58	1.14898159367607	NA	NA	9.0382	1.77362733009357
GAH1_2015	LH74/PHN82	83.2876	0.0196319753457151	13.7896	17.6619827910535	0.0076923	123.497193526277	179.5264	0.0214286134876847	58	1.60640529202969	58	1.14898159367607	NA	NA	8.5353	1.76499601073475
GAH1_2015	LH74/TX205	83.53	0.0173464187891858	13.2589	16.0363400815965	0.0678638	123.497193526277	171.3093	0.0208197657643865	59.5	1.60640529202969	60.5	1.14898159367607	NA	NA	9.8407	1.77152389932545
GAH1_2015	LH82/B47	60.9225	0.0196319753457151	13.7257	18.0096202319989	0.1410428	123.497193526277	152.3621	0.0217524686596518	54	1.60640529202969	54	1.14898159367607	NA	NA	7.0217	1.80118952636542
GAH1_2015	LH82/LH195	73.6698	0.0196319753457151	14.3085	18.2254198356279	0	123.497193526277	159.2058	0.021812529073362	58	1.60640529202969	58	1.14898159367607	NA	NA	9.1585	1.80960324943788
GAH1_2015	LH82/TX777	67.1425	0.0196319753457151	14.0127	19.360511459352	0.6378676	123.497193526277	173.9553	0.0221799574866483	61	1.60640529202969	62	1.14898159367607	NA	NA	5.2398	1.8766954377312
GAH1_2015	M0001/LH82	76.131	0.00981560851616269	13.74	8.07819377160899	0.2459017	61.7485905882789	171.6535	0.0105833420676092	55.4295	0.803131090674411	55.5019	0.574440540072702	NA	NA	6.9415	0.843693334300428
GAH1_2015	M0008/LH195	57.1185	0.00981560851616269	14.2893	9.6845431390196	0.0714286	61.7485905882789	154.6225	0.0111086445777812	65.4295	0.803131090674411	65.5019	0.574440540072702	NA	NA	6.5825	0.942046855733662
GAH1_2015	M0008/LH198	78.541	0.00981560851616269	13.5012	9.71348315208906	0.1230769	61.7485905882789	174.9059	0.0111414764262876	61.4295	0.803131090674411	63.5019	0.574440540072702	NA	NA	5.958	0.943570029738159
GAH1_2015	M0010/LH195	86.0909	0.00981560851616269	13.5889	9.70812389040953	0.1698113	61.7485905882789	187.5069	0.0111579270913684	63.4295	0.803131090674411	65.5019	0.574440540072702	NA	NA	7.3243	0.943497497642707
GAH1_2015	M0010/PB80	76.4595	0.00881084327482187	13.9039	8.53194459380905	0.109375	61.7485905882789	172.8362	0.0107143997786008	61.4295	0.803131090674411	63.5019	0.574440540072702	NA	NA	7.7401	0.899543047798651
GAH1_2015	M0015/LH195	96.0903	0.00981560851616269	13.209	9.61094261195408	0.2608696	61.7485905882789	171.1083	0.0111600303835034	63.4295	0.803131090674411	65.5019	0.574440540072702	NA	NA	7.169	0.942989772974541
GAH1_2015	M0015/LH82	48.9531	0.00981560851616269	13.709	9.60808433905834	0.171875	61.7485905882789	137.0731	0.0111476084767619	54.4295	0.803131090674411	54.5019	0.574440540072702	NA	NA	7.1884	0.942844708783637
GAH1_2015	M0016/LH195	66.0902	0.00881084327482187	13.7371	8.42654578077833	0.0212766	61.7485905882789	154.4071	0.0106628161268099	63.4295	0.803131090674411	65.5019	0.574440540072702	NA	NA	7.7124	0.894610865307899
GAH1_2015	M0016/PB80	76.0955	0.00981560851616269	13.8857	9.59808038392321	0.0476191	61.7485905882789	169.1224	0.01114276831401	61.4295	0.803131090674411	63.5019	0.574440540072702	NA	NA	7.7344	0.941756727351853
GAH1_2015	M0028/LH195	82.9136	0.00981560851616269	13.301	9.66560708108527	0.0416667	61.7485905882789	166.8302	0.0110805892986475	63.4295	0.803131090674411	65.5019	0.574440540072702	NA	NA	6.198	0.940886342206426
GAH1_2015	M0028/PHZ51	86.0902	0.00981560851616269	13.4699	9.43444426064162	0.2686567	61.7485905882789	201.2173	0.0110985473623468	58.4295	0.803131090674411	58.5019	0.574440540072702	NA	NA	9.1445	0.939508232392834
GAH1_2015	M0030/LH185	66.4064	0.00981560851616269	13.3211	9.69990635583425	1.3104613e-08	61.7485905882789	156.7089	0.0111483221357954	56.4295	0.803131090674411	63.5019	0.574440540072702	NA	NA	9.338	0.942917240879089
GAH1_2015	M0030/LH195	76.0902	0.00981560851616269	13.1359	9.57735790542904	0.0384616	61.7485905882789	152.5275	0.0111085456547468	63.4295	0.803131090674411	65.5019	0.574440540072702	NA	NA	7.903	0.940741278015522
GAH1_2015	M0031/LH195	66.1049	0.00981560851616269	13.2596	8.35723266305643	0.0625	61.7485905882789	190.424	0.0107099305772277	65.4295	0.803131090674411	65.5019	0.574440540072702	NA	NA	7.5153	0.864582577790672
GAH1_2015	M0031/PB80	76.0902	0.00867283023789808	13.7396	8.01423991556662	0.2461539	61.7485905882789	166.4593	0.0104113266874327	61.4295	0.803131090674411	63.5019	0.574440540072702	NA	NA	5.5266	0.885616885471821
GAH1_2015	M0039/LH195	96.0905	0.00981560851616269	13.7786	8.43619245180148	0.0892857	61.7485905882789	195.438	0.0105923240435968	63.4295	0.803131090674411	65.5019	0.574440540072702	NA	NA	6.5527	0.863059403786175
GAH1_2015	M0039/PHZ51	106.0921	0.00981560851616269	13.1795	9.68275671845976	0.2686567	61.7485905882789	208.0727	0.0111083171896437	58.4295	0.803131090674411	58.5019	0.574440540072702	NA	NA	7.3681	0.939435700297382
GAH1_2015	M0052/LH82	56.0902	0.00981560851616269	12.7438	8.53194459380905	0.2916667	61.7485905882789	146.1212	0.010707629439024	54.4295	0.803131090674411	54.5019	0.574440540072702	NA	NA	6.8402	0.867338797417857
GAH1_2015	M0058/LH195	86.0902	0.00881084327482187	14.0341	6.44933550514436	0.1470588	61.7485905882789	161.6156	0.00975215422572117	63.4295	0.803131090674411	65.5019	0.574440540072702	NA	NA	7.7004	0.742438529049104
GAH1_2015	M0058/LH82	56.2038	0.00981560851616269	13.8169	9.54806060824762	0.5714286	61.7485905882789	143.9477	0.0111096714930901	54.4295	0.803131090674411	54.5019	0.574440540072702	NA	NA	6.6661	0.938202654674694
GAH1_2015	M0075/LH195	66.1378	0.00881084327482187	12.9914	8.52372705923377	0.4920635	61.7485905882789	164.9987	0.0107042742994424	63.4295	0.803131090674411	65.5019	0.574440540072702	NA	NA	5.2334	0.89918038732139
GAH1_2015	M0075/LH82	66.0904	0.00981560851616269	14.4086	9.70883845863347	0.238806	61.7485905882789	135.968	0.0111584370160573	54.4295	0.803131090674411	55.5019	0.574440540072702	NA	NA	7.7239	0.943715093929063
GAH1_2015	M0143/LH195	96.1073	0.00981560851616269	12.9331	9.53877122133644	0.0153846	61.7485905882789	185.1038	0.0110539142313739	65.4295	0.803131090674411	68.5019	0.574440540072702	NA	NA	8.7062	0.938710379342859
GAH1_2015	M0143/PHZ51	86.0963	0.00881084327482187	13.6793	7.5247606821697	0.1940299	61.7485905882789	184.8794	0.0101924877376655	55.4295	0.803131090674411	58.5019	0.574440540072702	NA	NA	7.1009	0.820918256328425
GAH1_2015	M0154/LH195	86.091	0.00881084327482187	13.8959	8.36545019763171	0.0677966	61.7485905882789	173.8151	0.010693976882629	61.4295	0.803131090674411	63.5019	0.574440540072702	NA	NA	9.6245	0.897439617030536
GAH1_2015	M0154/LH198	66.0903	0.00867283023789808	13.724	7.86418058853983	0.0862069	61.7485905882789	158.489	0.0103604861360545	56.4295	0.803131090674411	61.5019	0.574440540072702	NA	NA	6.9083	0.881264959744687
GAH1_2015	M0262/LH195	76.9705	0.00981560851616269	13.0337	9.714197720313	0.0677966	61.7485905882789	176.4353	0.0111559898486124	63.4295	0.803131090674411	65.5019	0.574440540072702	NA	NA	5.539	0.943787626024516
GAH1_2015	M0262/LH82	66.0902	0.00981560851616269	14.1542	9.63630978390385	0.3472222	61.7485905882789	152.9285	0.0110271461293419	54.4295	0.803131090674411	54.5019	0.574440540072702	NA	NA	5.6828	0.936969609052006
GAH1_2015	M162W/B47	85.9622	0.0196319753457151	13.9875	17.6305417892002	0.1384615	123.497193526277	169.3603	0.0215640438323255	61	1.60640529202969	62	1.14898159367607	NA	NA	6.6917	1.77217668818452
GAH1_2015	M162W/LH195	105.3072	0.0186264517909846	13.9316	18.1989808113422	0.455698	123.497193526277	203.4431	0.0217524686596518	65	1.60640529202969	66.5	1.14898159367607	NA	NA	7.4365	1.83411909770073
GAH1_2015	MP718/PHZ51	121.3688	0.0196319753457151	15.5238	16.3875503636616	0.0763889	123.497193526277	232.3148	0.0212566758327494	62	1.60640529202969	64	1.14898159367607	NA	NA	10.6729	1.7099441502865
GAH1_2015	MP719/PHZ51	107.5738	0.0196319753457151	15.4171	17.8595609049721	0.1224942	123.497193526277	218.3205	0.0216417690735976	62	1.60640529202969	64	1.14898159367607	NA	NA	10.3804	1.79995648074273
GAH1_2015	N192/LH82	60.7854	0.0196319753457151	13.6879	18.2136294599329	0.0746269	123.497193526277	152.6549	0.0218101737630205	54	1.60640529202969	54	1.14898159367607	NA	NA	7.7041	1.80619424095162
GAH1_2015	N192/PHZ51	89.3104	0.0196319753457151	13.198	17.5126380322506	0.0735294	123.497193526277	194.1586	0.0215711097633502	55.5	1.60640529202969	57	1.14898159367607	NA	NA	7.8048	1.77130630303909
GAH1_2015	N501/LH82	64.5443	0.0184884387540608	13.9533	16.5501146346073	0.1771313	123.497193526277	158.3428	0.0211518645225492	54	1.60640529202969	54	1.14898159367607	NA	NA	7.0962	1.75556683832596
GAH1_2015	N501/PHZ51	98.6118	0.0196319753457151	13.8284	18.2300645290835	0.3093168	123.497193526277	206.1046	0.0218172396940452	54	1.60640529202969	55.5	1.14898159367607	NA	NA	7.5388	1.80989337781969
GAH1_2015	N542/LH82	60.5423	0.00981560851616269	13.7142	8.53230187792102	0.0483871	61.7485905882789	140.3696	0.0107103886850891	53.5705	0.803297838012262	53.4981	0.574559633027523	NA	NA	7.1299	0.867483861608762
GAH1_2015	N542/PHZ51	75.1851	0.0184891970674505	13.2642	17.4461831874245	0.0217391	123.497193526277	177.0079	0.0214910292117365	55	1.60640529202969	58	1.14898159367607	NA	NA	8.8664	1.82454486110104
GAH1_2015	NC258/B47	78.896	0.0196319753457151	14.0382	19.3297850257227	0.1449653	123.497193526277	188.4356	0.0221387395556707	62	1.60640529202969	63	1.14898159367607	NA	NA	8.7959	1.87713063030391
GAH1_2015	NC358/LH195	91.2732	0.0196319753457151	15.0196	19.268689442576	0.0471306	123.497193526277	179.101	0.0222188201072844	62	1.60640529202969	63	1.14898159367607	NA	NA	9.6665	1.88373105099006
GAH1_2015	NC358/LH82	60.9082	0.0186264517909846	14.7043	17.2396729707066	0.05	123.497193526277	147.9538	0.0213084926602641	54	1.60640529202969	56.5	1.14898159367607	NA	NA	9.8954	1.76376296511206
GAH1_2015	NC358/PHZ51	81.3341	0.0196319753457151	14.6982	17.7148608396248	0.0590526	123.497193526277	181.8062	0.0214957398324197	55.5	1.60640529202969	61	1.14898159367607	NA	NA	9.6393	1.77181402770726
GAH1_2015	OH43/LH195	90.002	0.0196319753457151	14.3611	19.4201779060507	0.0937947	123.497193526277	180.1643	0.0222894794175318	61	1.60640529202969	63	1.14898159367607	NA	NA	9.4457	1.88677739899906
GAH1_2015	OH43/LH82	54.7978	0.0186264517909846	13.8624	18.0064046749911	0.1529199	123.497193526277	147.8094	0.0217501133493102	54	1.60640529202969	54.5	1.14898159367607	NA	NA	7.7142	1.8331036483644
GAH1_2015	OH7B/LH195	94.0611	0.0196319753457151	14.1644	18.1857612991994	0.2428571	123.497193526277	198.9044	0.0218160620388744	63	1.60640529202969	65	1.14898159367607	NA	NA	6.9326	1.80837020381519
GAH1_2015	PB80/LH82	74.7262	0.0196319753457151	14.1207	18.2147013122688	0.3532051	123.497193526277	169.2204	0.021812529073362	58	1.60640529202969	59.5	1.14898159367607	NA	NA	6.2619	1.80916805686516
GAH1_2015	PB80/PHZ51	100.0288	0.0392085938139827	13.64	38.7574658981247	0.1522576	246.994387052554	203.734	0.0444670815938385	58	3.19885446918361	60.25	2.2879810743754	NA	NA	9.0984	3.76550373540292
GAH1_2015	PHAW6/LH82	72.8457	0.0174791236323818	13.7279	15.5450744276398	0.289857	123.497193526277	143.9345	0.0204664692131497	57	1.60640529202969	58	1.14898159367607	NA	NA	5.7109	1.70312613331399
GAH1_2015	PHAW6/PHZ51	95.4361	0.0176194116094747	13.7947	16.9084705989118	0.1252665	123.497193526277	179.5291	0.0213049596947518	59.5	1.60640529202969	58	1.14898159367607	NA	NA	9.6744	1.79067237252484
GAH1_2015	PHG39/LH195	106.1674	0.0196319753457151	13.7887	19.4033855527882	0.0092593	123.497193526277	193.9117	0.0222470838313833	63	1.60640529202969	65	1.14898159367607	NA	NA	8.5134	1.88293319794009
GAH1_2015	PHG39/PHG35	103.4473	0.0184891970674505	13.7135	16.1796110104959	0.0373134	123.497193526277	188.9978	0.0207549947299931	61	1.60640529202969	63	1.14898159367607	NA	NA	11.0545	1.71182998476826
GAH1_2015	PHG39/PHM49	101.5841	0.0196319753457151	14.0466	19.348721083657	0.0075758	123.497193526277	192.3383	0.0221599373487449	61	1.60640529202969	63	1.14898159367607	NA	NA	9.9786	1.87480960324944
GAH1_2015	PHG39/PHN82	89.4715	0.0196319753457151	14.0485	19.3247830481551	0.0151654	123.497193526277	181.594	0.022109298176401	62	1.60640529202969	64	1.14898159367607	NA	NA	11.7426	1.87444694277218
GAH1_2015	PHG39/TX205	90.9459	0.0196319753457151	13.9235	18.1929069814387	0.031592	123.497193526277	207.6118	0.0217477580389686	62	1.60640529202969	64	1.14898159367607	NA	NA	10.6623	1.80438093856531
GAH1_2015	PHG80/LH82	57.7446	0.0184891970674505	13.2359	17.6141067200497	0.0873016	123.497193526277	156.3723	0.0215746427288626	54	1.60640529202969	55.5	1.14898159367607	NA	NA	7.2726	1.82846159425546
GAH1_2015	PHG80/PHZ51	102.3838	0.0196319753457151	13.1814	19.2815516706069	0.015625	123.497193526277	194.6062	0.0222235307279675	57	1.60640529202969	59.5	1.14898159367607	NA	NA	9.6894	1.87966925364474
GAH1_2015	PHHV4/LH82	69.9583	0.0186264517909846	14.064	17.0074382979271	0.1033802	123.497193526277	169.8545	0.0213767966601699	54	1.60640529202969	54.5	1.14898159367607	NA	NA	10.0977	1.76369043301661
GAH1_2015	PHHV4/PHZ51	88.3367	0.0186264517909846	13.7959	18.2172023010526	0.1584222	123.497193526277	200.5005	0.0218054631423373	57	1.60640529202969	60.5	1.14898159367607	NA	NA	8.4242	1.83912381228694
GAH1_2015	PHKE6/B47	71.9785	0.0176216865496437	13.6241	16.8613090961319	0.0430944	123.497193526277	173.4025	0.0213061373499226	54	1.60640529202969	54	1.14898159367607	NA	NA	8.0433	1.79379125262929
GAH1_2015	PHKE6/PHZ51	82.9764	0.0196319753457151	13.328	19.2200988033483	0.0076923	123.497193526277	194.5588	0.0223130325209475	54	1.60640529202969	56	1.14898159367607	NA	NA	9.2303	1.88561688547182
GAH1_2015	PHM49/B47	78.1494	0.0174268000084931	13.9089	15.1574211661539	0.030303	123.497193526277	169.63	0.0203593025926079	57.4295	1.59906421426267	60.0019	1.14378858692516	NA	NA	9.2885	1.67541887285124
GAH1_2015	PHM49/PHZ51	92.6874	0.0186264517909846	13.5646	17.2793315071351	0.0070423	123.497193526277	192.0092	0.0214239028670015	59.5	1.60640529202969	62	1.14898159367607	NA	NA	9.0378	1.77029085370276
GAH1_2015	PHN11_PHW65_0323/LH195	93.7037	0.0185089132155824	13.4227	17.6305417892002	0.0073529	123.497193526277	177.6214	0.0217300932114068	61	1.60640529202969	63	1.14898159367607	NA	NA	10.6212	1.83208819902807
GAH1_2015	PHN66/LH82	70.8068	0.0184891970674505	13.5366	16.3371733038741	0.0716387	123.497193526277	155.986	0.0210658956950815	54	1.60640529202969	56	1.14898159367607	NA	NA	9.2994	1.74592006963081
GAH1_2015	PHN66/PHZ51	98.4221	0.0186264517909846	13.8592	18.2100566188132	0.1183214	123.497193526277	193.2364	0.0218725894870723	55	1.60640529202969	58	1.14898159367607	NA	NA	8.5258	1.84296801334591
GAH1_2015	PHN82/LH82	68.194	0.0196319753457151	13.4873	18.0496360525393	0.087484	123.497193526277	142.9259	0.0217194943148697	55.5	1.60640529202969	57	1.14898159367607	NA	NA	6.702	1.80467106694712
GAH1_2015	PHN82/PHZ51	92.9036	0.0186264517909846	13.827	16.4954501654761	0.0677489	123.497193526277	192.8694	0.0210635403847399	59.5	1.60640529202969	62	1.14898159367607	NA	NA	10.1317	1.72401537680424
GAH1_2015	PHP02/B47	62.8169	0.0184891970674505	12.937	16.0338390928128	0.1	123.497193526277	161.6377	0.0207043555576492	55	1.60640529202969	56	1.14898159367607	NA	NA	7.002	1.70885616885472
GAH1_2015	PHR25/B47	75.6318	0.0186264517909846	13.6241	16.8666683578115	0.0307692	123.497193526277	180.3736	0.0213732636946576	54	1.60640529202969	54	1.14898159367607	NA	NA	7.5768	1.76122434177123
GAH1_2015	PHR25/LH82	53.6096	0.00981560851616269	13.6083	9.67811202500417	0.0882353	61.7485905882789	144.644	0.0110863845397429	50.5705	0.803297838012262	53.4981	0.574559633027523	NA	NA	6.0603	0.941829259447305
GAH1_2015	PHW52/PHG35	84.2924	0.0196319753457151	13.8282	17.7370124545669	0.0519096	123.497193526277	177.1615	0.0215828863150581	58	1.60640529202969	61	1.14898159367607	NA	NA	11.555	1.77362733009357
GAH1_2015	PHW52/PHM49	76.6722	0.0196319753457151	14.7601	19.3179946500277	0.0076923	123.497193526277	178.3571	0.0220975216246931	61	1.60640529202969	63	1.14898159367607	NA	NA	10.8456	1.87727569449481
GAH1_2015	PHW52/PHN82	71.0256	0.0184891970674505	15.0555	16.1935450908627	0	123.497193526277	184.4457	0.0207703042472134	61	1.60640529202969	62	1.14898159367607	NA	NA	11.3316	1.71270036991369
GAH1_2015	PHW52/TX205	86.5322	0.0196319753457151	13.9314	17.6937810770187	0.0447761	123.497193526277	192.9493	0.0215063387289568	61	1.60640529202969	63	1.14898159367607	NA	NA	11.9614	1.76695437731196
GAH1_2015	PHW53/LH82	52.2685	0.0196319753457151	13.7857	18.0382029609564	0.3114583	123.497193526277	131.5247	0.0217536463148226	54	1.60640529202969	54	1.14898159367607	NA	NA	5.8533	1.80619424095162
GAH1_2015	PHW53/PHZ51	84.0001	0.0196319753457151	13.3265	17.7370124545669	0.4102692	123.497193526277	168.4874	0.0215828863150581	59.5	1.60640529202969	61	1.14898159367607	NA	NA	6.0784	1.77362733009357
GAH1_2015	REDEAR-B/LH195	104.6434	0.0196319753457151	15.3212	17.6812761330998	0.4931296	123.497193526277	204.6883	0.0214627654876376	62	1.60640529202969	63	1.14898159367607	NA	NA	8.334	1.76383549720751
GAH1_2015	TX130_RP/B47	83.0908	0.0184884387540608	13.5949	15.9245101545504	0.5095486	123.497193526277	175.2305	0.0206808024542334	61	1.60640529202969	62	1.14898159367607	NA	NA	5.6977	1.70820337999565
GAH1_2015	TX205/B47	94.5777	0.0196319753457151	13.3146	19.2679748743521	0.1732537	123.497193526277	196.6918	0.0222847687968486	59.5	1.60640529202969	59.5	1.14898159367607	NA	NA	9.8254	1.88394864727642
GAH1_2015	TX205/LH195	93.9737	0.0186264517909846	13.7902	14.9544837905558	0.1033802	123.497193526277	203.9553	0.0204417384545631	63	1.60640529202969	65	1.14898159367607	NA	NA	9.8021	1.60854428084427
GAH1_2015	TX29A/PHZ51	115.8212	0.0196319753457151	13.8315	17.7402280115746	0.261204	123.497193526277	221.9484	0.0216193936253526	61	1.60640529202969	63	1.14898159367607	NA	NA	8.1786	1.77515050409806
GAH1_2015	TX303/B47	94.0396	0.0176216865496437	13.6239	17.0117257072707	0.3472837	123.497193526277	197.7191	0.0213367563843631	61	1.60640529202969	63	1.14898159367607	NA	NA	7.3238	1.79603974758831
GAH1_2015	TX303/LH195	94.1106	0.0196319753457151	14.2466	19.3054897061088	0.3404762	123.497193526277	193.789	0.0222741699003115	65	1.60640529202969	68	1.14898159367607	NA	NA	8.3513	1.88445637194459
GAH1_2015	TX303/LH82	89.9117	0.0196319753457151	13.7803	17.6798469966519	0.4281999	123.497193526277	186.9792	0.0214792526600286	61	1.60640529202969	62	1.14898159367607	NA	NA	7.9688	1.76463335025749
GAH1_2015	TX303/PHZ51	114.0699	0.0196319753457151	13.8525	19.2761924089274	0.1731117	123.497193526277	218.1032	0.0222317743141631	61	1.60640529202969	64	1.14898159367607	NA	NA	7.2599	1.88394864727642
GAH1_2015	TX601/PHZ51	98.4374	0.0185089132155824	13.5615	16.5226037579857	0.5415614	123.497193526277	195.5383	0.0210764945916186	61	1.60640529202969	63	1.14898159367607	NA	NA	6.9061	1.74860375716254
GAH1_2015	TX61M/B47	79.1374	0.0173464187891858	13.6851	14.9016057419844	0.5895522	123.497193526277	188.6204	0.0202003191445513	58	1.60640529202969	58	1.14898159367607	NA	NA	6.0419	1.68724160440995
GAH1_2015	TX61M/PHZ51	110.6808	0.0174836735127199	14.2024	15.5840183958444	0.5428068	123.497193526277	204.2108	0.020677269488721	57	1.60640529202969	61	1.14898159367607	NA	NA	8.9703	1.71233770943643
GAH1_2015	TX714/PHZ51	101.7813	0.0196319753457151	13.383	19.3805193696222	0.0708333	123.497193526277	213.2428	0.022243550865871	58.5	1.60640529202969	63	1.14898159367607	NA	NA	9.9697	1.88126495974469
GAH1_2015	TX745RP/B47	80.0263	0.0196319753457151	14.1292	19.1229175248929	0.3153846	123.497193526277	172.3091	0.0220669025902525	62	1.60640529202969	62	1.14898159367607	NA	NA	7.9492	1.87154565895409
GAH1_2015	TX745RP/PHZ51	87.9876	0.0184891970674505	13.7514	17.7291522041036	0.1421064	123.497193526277	182.3331	0.0215687544530086	61	1.60640529202969	61	1.14898159367607	NA	NA	9.9133	1.82940451149634
GAH1_2015	TX768/B47	58.2578	0.0185089132155824	15.0487	16.8702411989311	0.1567164	123.497193526277	160.6775	0.0211801282466481	54	1.60640529202969	56.5	1.14898159367607	NA	NA	4.5569	1.75455138898963
GAH1_2015	TX768/PHZ51	81.8007	0.0196319753457151	13.4797	19.4066011097959	0.2416911	123.497193526277	175.6549	0.022304788934752	55	1.60640529202969	59.5	1.14898159367607	NA	NA	6.9042	1.8865598027127
GAH1_2015	TX770/B47	90.916	0.0184891970674505	14.0064	17.5976716508991	0.8801587	123.497193526277	178.865	0.0215122270048107	61	1.60640529202969	63	1.14898159367607	NA	NA	3.6134	1.82454486110104
GAH1_2015	TX770/LH195	89.38	0.0174791236323818	14.0763	15.2756822072155	0.3102502	123.497193526277	187.6413	0.0201826543169894	66.5	1.60640529202969	68	1.14898159367607	NA	NA	9.4303	1.67665191847392
GAH1_2015	TX772/B47	100.0594	0.0196319753457151	15.1862	17.5801647294127	0.3159259	123.497193526277	192.3983	0.021527536522031	61	1.60640529202969	63	1.14898159367607	NA	NA	6.6617	1.77065351418002
GAH1_2015	TX772/LH195	89.839	0.0184884387540608	14.5666	16.8898918250894	0.5680067	123.497193526277	189.6551	0.0211683516949402	62	1.60640529202969	63	1.14898159367607	NA	NA	6.7506	1.75984623195764
GAH1_2015	TX772W/B47	92.0072	0.0174836735127199	14.1371	13.8301106901907	0.259058	123.497193526277	180.8517	0.0196185574901813	58	1.60640529202969	58	1.14898159367607	NA	NA	9.0814	1.57909625009066
GAH1_2015	TX772W/LH195	75.2001	0.0196319753457151	13.8343	18.2193460057244	0.1641604	123.497193526277	170.9977	0.0217995748664833	63	1.60640529202969	64	1.14898159367607	NA	NA	6.8817	1.8088053963879
GAH1_2015	TX802/PHZ51	104.9574	0.0186264517909846	14.4305	16.5411825318081	0.4861472	123.497193526277	186.735	0.021124778453621	61	1.60640529202969	63	1.14898159367607	NA	NA	7.8017	1.72872996300863
GAH1_2015	TX803/PHZ51	90.6718	0.0196319753457151	14.3246	17.7309386246634	0.0300905	123.497193526277	193.237	0.0215817086598873	61	1.60640529202969	63	1.14898159367607	NA	NA	10.0221	1.77326466961631
GAH1_2015	TX81/PHZ51	109.1646	0.0184884387540608	13.8209	14.9012484578725	0.2028986	123.497193526277	223.9452	0.0204052311442686	59.5	1.60640529202969	64	1.14898159367607	NA	NA	9.4241	1.63741205483426
GAH1_2015	W10001_0003/B47	86.8883	0.0173464187891858	13.1454	16.0145457507665	0.7108993	123.497193526277	178.0218	0.0208021009368247	54	1.60640529202969	56	1.14898159367607	NA	NA	4.5522	1.76840501922101
GAH1_2015	W10001_0006/B47	68.2801	0.0196319753457151	13.5534	19.1861568127113	0.7783217	123.497193526277	177.5095	0.0221281406591336	52.5	1.60640529202969	54	1.14898159367607	NA	NA	5.7889	1.87314136505404
GAH1_2015	W10001_0007/B47	82.1278	0.0185089132155824	14.1362	17.5858812752042	0.7903541	123.497193526277	172.897	0.0215287141772018	54	1.60640529202969	54	1.14898159367607	NA	NA	5.2506	1.82367447595561
GAH1_2015	W10005_0111/B47	80.1185	0.0196319753457151	13.8514	17.0381647315564	0.2229702	123.497193526277	173.1162	0.0213344010740215	55.5	1.60640529202969	58	1.14898159367607	NA	NA	8.0345	1.73155871473127
GAH1_2015	W10005_0111/LH195	89.8349	0.0186264517909846	13.8128	18.0889373048559	0.4484626	123.497193526277	160.634	0.0218113514181912	61	1.60640529202969	63	1.14898159367607	NA	NA	6.3029	1.83760063828244
GAH1_2015	W10005_0346/B47	83.3009	0.0196319753457151	13.7634	17.5469373069996	0.0368906	123.497193526277	178.2627	0.0214392123842218	55	1.60640529202969	58	1.14898159367607	NA	NA	8.9845	1.76753463407558
GAH1_2015	W10005_0346/LH195	125.743	0.00981560851616269	14.9927	9.68883054836323	0.1964286	61.7485905882789	224.5412	0.0110917381601493	62.5705	0.803297838012262	62.4981	0.574559633027523	NA	NA	2.0847	0.939290636106477
GAH1_2015	W10008_0018/B47	72.218	0.0196319753457151	14.1211	18.0028318338715	0.5265152	123.497193526277	161.5835	0.0216912305907707	54	1.60640529202969	54	1.14898159367607	NA	NA	5.5807	1.79937622397911
GAH1_2015	W10008_0119/B47	75.701	0.0186264517909846	14.0601	15.531497631385	0.2567405	123.497193526277	171.445	0.0204346725235384	55	1.60640529202969	55.5	1.14898159367607	NA	NA	6.9351	1.63284253282077
GAH1_2015	WF9/B47	83.2185	0.0196319753457151	13.5031	19.0961212164952	0.4	123.497193526277	172.2851	0.022221175417626	54.5	1.60640529202969	58	1.14898159367607	NA	NA	5.0608	1.88097483136288
GAH1_2015	WF9/C103	101.7397	0.0185142214093103	13.3551	17.9353051367094	0.1423856	123.497193526277	194.0725	0.0215687544530086	61.4295	1.59906421426267	65.5019	1.14378858692516	NA	NA	5.7907	1.83012983245086
GAH1_2015	WF9/H95	78.9317	0.0196319753457151	14.001	17.6316136415361	0.4578373	123.497193526277	150.888	0.0215616885219839	59.5	1.60640529202969	62	1.14898159367607	NA	NA	6.3312	1.77217668818452
GAH1_2015	WF9/OH43	77.0299	0.0185900527482794	13.409	17.1006894511509	0.1394117	123.497193526277	177.4703	0.0212908278327023	54.4295	1.59906421426267	56.5019	1.14378858692516	NA	NA	9.7422	1.76448828606658
GAH1_2015	Z013E0006/LH195	93.9098	0.00981560851616269	14.0309	9.68311400257173	0.0819672	61.7485905882789	189.5219	0.0110979020073132	64.5705	0.803297838012262	64.4981	0.574559633027523	NA	NA	7.7829	0.939363168201929
GAH1_2015	Z013E0006/PHZ51	86.2727	0.00981560851616269	14.2449	8.07605006693718	0.0793651	61.7485905882789	187.5785	0.010574625064035	60.5705	0.803297838012262	62.4981	0.574559633027523	NA	NA	10.7949	0.843548270109523
GAH1_2015	Z013E0007/LH195	93.9103	0.00981560851616269	13.9462	9.70240734461803	0.1333333	61.7485905882789	179.9945	0.0111559945592331	62.5705	0.803297838012262	64.4981	0.574559633027523	NA	NA	7.6145	0.943062305069993
GAH1_2015	Z013E0007/PB80	104.2146	0.00981560851616269	13.7323	9.56199468861439	0.515625	61.7485905882789	173.1432	0.011105871199854	64.5705	0.803297838012262	64.4981	0.574559633027523	NA	NA	5.7197	0.937912526292884
GAH1_2015	Z013E0009/LH195	93.9098	0.00981560851616269	15.0181	9.60594063438652	0	61.7485905882789	167.1174	0.0111587408510914	62.5705	0.803297838012262	64.4981	0.574559633027523	NA	NA	7.1183	0.942554580401828
GAH1_2015	Z013E0009/PHZ51	103.9214	0.00981560851616269	14.4351	9.71491228853693	0.1029412	61.7485905882789	187.5322	0.0111597607004693	60.5705	0.803297838012262	62.4981	0.574559633027523	NA	NA	11.0776	0.94393269021542
GAH1_2015	Z013E0012/LH195	83.9098	0.00981560851616269	15.4023	8.52122607044999	0	61.7485905882789	162.1184	0.0107037702630293	64.5705	0.803297838012262	67.4981	0.574559633027523	NA	NA	5.9837	0.866395880176978
GAH1_2015	Z013E0012/LH82	53.9098	0.00981560851616269	13.4786	9.67704017266827	0.3478261	61.7485905882789	150.3393	0.0110783470432023	57.5705	0.803297838012262	57.4981	0.574559633027523	NA	NA	6.6353	0.941611663160949
GAH1_2015	Z013E0021/LH195	83.9099	0.00981560851616269	14.2635	8.53194459380905	0.2608696	61.7485905882789	175.2976	0.0107148260897727	62.5705	0.803297838012262	64.4981	0.574559633027523	NA	NA	7.1437	0.86741132951331
GAH1_2015	Z013E0021/PB80	93.9098	0.00981560851616269	14.4302	9.58486087178038	0.3088235	61.7485905882789	170.1465	0.011108933103298	62.5705	0.803297838012262	62.4981	0.574559633027523	NA	NA	6.6966	0.938637847247407
GAH1_2015	Z013E0022/LH195	93.9105	0.00981560851616269	14.2785	9.7084811745215	0.0588235	61.7485905882789	158.1264	0.0111576680072308	62.5705	0.803297838012262	67.4981	0.574559633027523	NA	NA	8.3492	0.943642561833611
GAH1_2015	Z013E0022/LH82	83.9491	0.00981560851616269	13.84	9.71455500442496	0.0185185	61.7485905882789	146.5724	0.0111593131915044	53.5705	0.803297838012262	53.4981	0.574559633027523	NA	NA	7.1649	0.943860158119968
GAH1_2015	Z013E0026/LH195	93.9099	0.00981560851616269	14.9733	9.67704017266827	0.1911765	61.7485905882789	170.6751	0.0111077483821962	62.5705	0.803297838012262	62.4981	0.574559633027523	NA	NA	7.7633	0.94132153477914
GAH1_2015	Z013E0026/PHZ51	93.9116	0.00981560851616269	13.9993	9.714197720313	0.2714286	61.7485905882789	188.1379	0.0111542575178562	57.5705	0.803297838012262	60.4981	0.574559633027523	NA	NA	9.0444	0.943715093929063
GAH1_2015	Z013E0027/LH195	93.9239	0.00981560851616269	13.7427	9.7152695726489	0.05	61.7485905882789	182.9697	0.0111614388590877	62.5705	0.803297838012262	64.4981	0.574559633027523	NA	NA	7.7169	0.944005222310873
GAH1_2015	Z013E0027/PB80	103.9098	0.00981560851616269	14.0329	9.60987075961818	0.0952381	61.7485905882789	178.3807	0.0111524486395139	62.5705	0.803297838012262	62.4981	0.574559633027523	NA	NA	6.8907	0.94262711249728
GAH1_2015	Z013E0037/LH195	84.0193	0.00981560851616269	13.9719	9.70312191284197	0.0172414	61.7485905882789	158.5474	0.0111490593479323	64.5705	0.803297838012262	67.4981	0.574559633027523	NA	NA	6.2305	0.943062305069993
GAH1_2015	Z013E0037/PHZ51	93.9098	0.00867358855128777	13.768	8.02210016602993	0.1	61.7485905882789	183.9228	0.0104162598849431	57.5705	0.803297838012262	62.4981	0.574559633027523	NA	NA	9.5135	0.886124610139987
GAH1_2015	Z013E0044/LH195	93.914	0.00981560851616269	13.7706	9.70812389040953	0.3823529	61.7485905882789	190.4419	0.0111530315788234	62.5705	0.803297838012262	64.4981	0.574559633027523	NA	NA	8.5384	0.94327990135635
GAH1_2015	Z013E0044/PB80	83.9098	0.00867358855128777	13.7367	8.02210016602993	0.4776119	61.7485905882789	176.3171	0.0104214109486601	62.5705	0.803297838012262	62.4981	0.574559633027523	NA	NA	5.0945	0.886342206426344
GAH1_2015	Z013E0046/LH195	84.7585	0.00981560851616269	14.4809	8.30506918270902	0	61.7485905882789	153.6102	0.0106570503270937	64.5705	0.803297838012262	67.4981	0.574559633027523	NA	NA	9.6203	0.859940523681729
GAH1_2015	Z013E0046/LH82	83.9149	0.00981560851616269	14.6101	9.71491228853693	0.1129032	61.7485905882789	137.4413	0.0111595946510902	55.5705	0.803297838012262	57.4981	0.574559633027523	NA	NA	8.4946	0.94393269021542
GAH1_2015	Z013E0058/LH195	93.91	0.00981560851616269	14.6547	9.68990240069913	0.0166667	61.7485905882789	181.2792	0.0110985461846917	64.5705	0.803297838012262	64.4981	0.574559633027523	NA	NA	6.4192	0.939508232392834
GAH1_2015	Z013E0058/PHZ51	103.9422	0.00981560851616269	13.9553	9.7152695726489	0.0634921	61.7485905882789	196.836	0.011160441385158	57.5705	0.803297838012262	60.4981	0.574559633027523	NA	NA	10.4318	0.94393269021542
GAH1_2015	Z013E0062/LH195	93.91	0.00981560851616269	12.8809	9.61094261195408	0.0526316	61.7485905882789	180.0535	0.011160117529986	62.5705	0.803297838012262	64.4981	0.574559633027523	NA	NA	6.4433	0.942989772974541
GAH1_2015	Z013E0062/PB80	93.9098	0.00881084327482187	14.1404	8.51622409288244	0.1044776	61.7485905882789	200.9279	0.0106709843430745	64.5705	0.803297838012262	64.4981	0.574559633027523	NA	NA	7.1945	0.895988975121491
GAH1_2015	Z013E0078/LH195	93.9098	0.00881084327482187	16.5166	8.53123002558512	0	61.7485905882789	180.5009	0.0107064305860601	64.5705	0.803297838012262	64.4981	0.574559633027523	NA	NA	7.4984	0.899252919416842
GAH1_2015	Z013E0078/PHZ51	93.9113	0.00981560851616269	14.2261	9.69097425303504	0.0140845	61.7485905882789	195.3972	0.0111110434613641	57.5705	0.803297838012262	60.4981	0.574559633027523	NA	NA	11.4963	0.939798360774643
GAH1_2015	Z013E0082/LH195	103.9098	0.00981560851616269	14.123	9.68883054836323	0.3428571	61.7485905882789	181.4435	0.011088646815326	62.5705	0.803297838012262	64.4981	0.574559633027523	NA	NA	6.5106	0.941611663160949
GAH1_2015	Z013E0082/PHZ51	83.9098	0.00981560851616269	13.6156	9.67060905865283	0.1857143	61.7485905882789	188.8524	0.0110808201190609	57.5705	0.803297838012262	60.4981	0.574559633027523	NA	NA	10.6232	0.941249002683688
GAH1_2015	Z013E0087/LH195	83.9098	0.00981560851616269	14.3124	9.68311400257173	0.3787879	61.7485905882789	178.3927	0.0111022605091003	62.5705	0.803297838012262	64.4981	0.574559633027523	NA	NA	7.0647	0.939290636106477
GAH1_2015	Z013E0087/LH82	63.9098	0.00981560851616269	14.371	9.70205006050606	0.3283582	61.7485905882789	157.6969	0.0111554387059925	53.5705	0.803297838012262	53.4981	0.574559633027523	NA	NA	7.1068	0.943207369260898
GAH1_2015	Z022E0006/LH195	83.8659	0.00867358855128777	14.3449	8.00244953987166	0.037037	61.7485905882789	176.6183	0.0103449422654553	62.5705	0.803297838012262	62.4981	0.574559633027523	NA	NA	7.858	0.880974831362878
GAH1_2015	Z022E0006/PHZ51	73.5697	0.00981560851616269	14.2337	9.71312586797709	0.2647059	61.7485905882789	174.6509	0.011139058700222	53.5705	0.803297838012262	53.4981	0.574559633027523	NA	NA	8.7225	0.943424965547255
GAH1_2015	Z022E0009/LH195	62.9628	0.00981560851616269	13.8041	9.71384043620103	0.0833333	61.7485905882789	180.9991	0.0111479959253131	62.5705	0.803297838012262	67.4981	0.574559633027523	NA	NA	5.6532	0.943497497642707
GAH1_2015	Z022E0009/LH82	53.9027	0.00867358855128777	14.2543	7.99423200529638	0.3103448	61.7485905882789	143.3051	0.0103638836712222	53.5705	0.803297838012262	53.4981	0.574559633027523	NA	NA	4.5212	0.884456371944585
GAH1_2015	Z022E0017/LH195	83.9098	0.00981560851616269	13.6681	9.61094261195408	0.1694915	61.7485905882789	190.0614	0.0111591600963322	62.5705	0.803297838012262	64.4981	0.574559633027523	NA	NA	5.2304	0.942989772974541
GAH1_2015	Z022E0017/PHZ51	83.9098	0.00981560851616269	13.7661	9.69061696892307	0.1388889	61.7485905882789	211.9736	0.0111098328318485	57.5705	0.803297838012262	60.4981	0.574559633027523	NA	NA	9.7078	0.939798360774643
GAH1_2015	Z022E0023/LH195	73.757	0.00881084327482187	14.0725	8.52479891156968	0	61.7485905882789	175.3557	0.0107091662790218	64.5705	0.803297838012262	67.4981	0.574559633027523	NA	NA	6.0326	0.899252919416842
GAH1_2015	Z022E0023/LH82	53.9098	0.00981560851616269	13.7805	8.53230187792102	0.06	61.7485905882789	133.6814	0.0107127157317066	53.5705	0.803297838012262	53.4981	0.574559633027523	NA	NA	7.2825	0.867338797417857
GAH1_2015	Z022E0036/LH195	63.8901	0.00881084327482187	13.8508	8.49085692093267	0.0740741	61.7485905882789	178.2659	0.0106301267745791	62.5705	0.803297838012262	64.4981	0.574559633027523	NA	NA	5.9544	0.897222020744179
GAH1_2015	Z022E0036/LH82	53.9098	0.00981560851616269	13.3309	8.53194459380905	0.0327869	61.7485905882789	155.7481	0.0107052823722686	53.5705	0.803297838012262	53.4981	0.574559633027523	NA	NA	5.4922	0.86741132951331
GAH1_2015	Z022E0048/LH195	73.9098	0.00981560851616269	13.7131	9.57307049608542	0	61.7485905882789	159.0073	0.0110854047306408	64.5705	0.803297838012262	67.4981	0.574559633027523	NA	NA	6.2326	0.940813810110974
GAH1_2015	Z022E0048/PHZ51	73.9098	0.00981560851616269	13.4361	9.61094261195408	0.0895522	61.7485905882789	196.1746	0.0111597642334348	60.5705	0.803297838012262	60.4981	0.574559633027523	NA	NA	8.8399	0.942989772974541
GAH1_2015	Z022E0051/LH195	73.9098	0.00867358855128777	13.718	8.02174288191796	0	61.7485905882789	146.1935	0.0104142590488079	64.5705	0.803297838012262	64.4981	0.574559633027523	NA	NA	7.0562	0.886052078044535
GAH1_2015	Z022E0051/PHZ51	103.9098	0.00981560851616269	12.8951	9.7084811745215	0.0454545	61.7485905882789	195.3916	0.0111572522949555	60.5705	0.803297838012262	62.4981	0.574559633027523	NA	NA	8.8523	0.943642561833611
GAH1_2015	Z022E0059/LH195	63.9098	0.00981560851616269	14.0683	9.71491228853693	0.0769231	61.7485905882789	162.3065	0.0111563655206119	64.5705	0.803297838012262	67.4981	0.574559633027523	NA	NA	6.3368	0.943860158119968
GAH1_2015	Z022E0059/LH82	63.9098	0.00981560851616269	13.547	9.61094261195408	0.15625	61.7485905882789	151.119	0.0111591600963322	53.5705	0.803297838012262	53.4981	0.574559633027523	NA	NA	8.6413	0.942917240879089
GAH1_2015	Z022E0072/LH195	93.4843	0.00981560851616269	14.917	9.58450358766841	0.0483871	61.7485905882789	185.8455	0.0111048124878554	60.5705	0.803297838012262	62.4981	0.574559633027523	NA	NA	9.1924	0.940958874301879
GAH1_2015	Z022E0072/PB80	63.9098	0.00867358855128777	14.4214	8.01495448379056	0.0327869	61.7485905882789	174.0454	0.0104200001177655	57.5705	0.803297838012262	62.4981	0.574559633027523	NA	NA	7.9074	0.886052078044535
GAH1_2015	Z022E0077/LH195	83.9098	0.00981560851616269	14.2592	9.6777547408922	0.0447761	61.7485905882789	155.348	0.0110841116652633	62.5705	0.803297838012262	64.4981	0.574559633027523	NA	NA	9.0002	0.941684195256401
GAH1_2015	Z022E0077/PHZ51	73.9098	0.00981560851616269	NA	9.71384043620103	0.0344827	61.7485905882789	164.6542	0.0111489922215876	55.5705	0.803297838012262	57.4981	0.574559633027523	NA	NA	8.2727	0.943860158119968
GAH1_2015	Z022E0083/LH195	83.9098	0.00981560851616269	13.8175	9.70276462873	0.047619	61.7485905882789	177.2429	0.0111561759181294	62.5705	0.803297838012262	62.4981	0.574559633027523	NA	NA	7.5192	0.943497497642707
GAH1_2015	Z022E0083/PB80	93.9098	0.00981560851616269	13.8346	9.70276462873	0.0882353	61.7485905882789	203.5799	0.0111547309352349	60.5705	0.803297838012262	62.4981	0.574559633027523	NA	NA	7.6616	0.94327990135635
GAH1_2015	Z022E0097/LH195	93.9098	0.00981560851616269	13.6722	9.714197720313	0	61.7485905882789	182.2743	0.0111522331286176	67.5705	0.803297838012262	67.4981	0.574559633027523	NA	NA	6.2082	0.943642561833611
GAH1_2015	Z022E0097/PHZ51	83.7876	0.00981560851616269	13.9206	9.66560708108527	0	61.7485905882789	196.2725	0.0110729533825201	57.5705	0.803297838012262	62.4981	0.574559633027523	NA	NA	9.1397	0.940596213824617
GAH1_2015	Z022E0108/LH195	63.9098	0.00981560851616269	13.8234	9.70276462873	0.238806	61.7485905882789	196.0062	0.011156055797302	62.5705	0.803297838012262	64.4981	0.574559633027523	NA	NA	6.342	0.94327990135635
GAH1_2015	Z022E0108/LH82	83.9098	0.00981560851616269	13.8243	9.61094261195408	0	61.7485905882789	163.1817	0.0111573111777141	53.5705	0.803297838012262	53.4981	0.574559633027523	NA	NA	7.2754	0.942917240879089
GAH1_2015	Z022E0110/LH195	83.9098	0.00981560851616269	13.1939	9.70205006050606	0.2941176	61.7485905882789	185.7573	0.0111555812022682	60.5705	0.803297838012262	62.4981	0.574559633027523	NA	NA	6.3065	0.943062305069993
GAH1_2015	Z022E0110/PHZ51	73.9098	0.00981560851616269	14.0006	9.69061696892307	0.1641791	61.7485905882789	195.5934	0.0111101237126757	53.5705	0.803297838012262	57.4981	0.574559633027523	NA	NA	10.7584	0.939798360774643
GAH1_2015	Z022E0121/LH195	92.7251	0.00981560851616269	13.5234	8.52980088913724	0.0357143	61.7485905882789	193.9332	0.0107091474365391	62.5705	0.803297838012262	64.4981	0.574559633027523	NA	NA	7.7388	0.867266265322405
GAH1_2015	Z022E0121/PB80	83.9098	0.00981560851616269	14.0184	9.61094261195408	0.0645161	61.7485905882789	180.251	0.0111590811934357	60.5705	0.803297838012262	62.4981	0.574559633027523	NA	NA	6.3691	0.942989772974541
GAH1_2015	Z022E0123/LH195	83.9098	0.00981560851616269	13.9728	8.53230187792102	0.0322581	61.7485905882789	172.4815	0.0107142926119803	60.5705	0.803297838012262	62.4981	0.574559633027523	NA	NA	8.8376	0.867483861608762
GAH1_2015	Z022E0123/PB80	80.6113	0.00981560851616269	13.1526	9.49589712790021	0.0285714	61.7485905882789	185.3645	0.0111591718728839	60.5705	0.803297838012262	62.4981	0.574559633027523	NA	NA	6.3413	0.94197432363821
GAH1_2016	((ARIZONA-LIB_16/PHZ51_B)/PHZ51)-(2N)-002PVP/LH195	105	0.0227047064274839	16.95	3.73664988412649	0.0508475	300.43631203104	210	0.0110711504087746	63	1.72257338297688	63	1.58724966089524	721.4673	0.000676384142173616	8.1177	0.84146650879567
GAH1_2016	((ARIZONA-LIB_16/PHZ51_B)/PHZ51)-(2N)-003/LH195	110	0.0227047064274839	17.5	3.73664988412649	0.0083333	300.43631203104	220	0.0110711504087746	62.5	1.72257338297688	62.5	1.58724966089524	NA	NA	9.7088	0.841424221921516
GAH1_2016	((CHIRIMITO-VEN_703/PHZ51_B)/PHZ51)-(2N)-001/LH195	100	0.0227047064274839	15.3	3.73664988412649	1.2793586e-17	300.43631203104	205	0.0110711504087746	62.5	1.72257338297688	64	1.58724966089524	NA	NA	8.772	0.841043640054127
GAH1_2016	((JORA-ANC1/PHZ51B)/PHZ51)-(2N)-002/LH195	85	0.0227047064274839	15.7	3.73664988412649	0.0188679	300.43631203104	200	0.0110711504087746	61.5	1.72257338297688	63.5	1.58724966089524	NA	NA	9.8911	0.84146650879567
GAH1_2016	((PHZ51/JALA-JAL44)/PHZ51)-(2N)-001/LH195	90	0.0227047064274839	16.1	3.73664988412649	1.2576745e-17	300.43631203104	205	0.0110711504087746	64	1.72257338297688	64	1.58724966089524	NA	NA	8.4607	0.830345060893099
GAH1_2016	((TUXPENO-GUA_456/PHZ51_B)/PHZ51)-(2N)-002/LH195	95	0.0227047064274839	17.4	3.73664988412649	1.2793586e-17	300.43631203104	200	0.0110711504087746	62.5	1.72257338297688	62.5	1.58724966089524	NA	NA	8.8328	0.839267591339648
GAH1_2016	(ALTIPLANO_BOV903/PHZ51)/PHZ51_002-(2N)-003/LH195	100	0.0227047064274839	15.15	3.73664988412649	0.0288679	300.43631203104	215	0.0110711504087746	61	1.72257338297688	62	1.58724966089524	NA	NA	6.8999	0.836476657645467
GAH1_2016	(ALTIPLANO_BOV903/PHZ51)/PHZ51_005-(2N)-005/LH195	85	0.0227047064274839	14.95	3.73664988412649	0.0125	300.43631203104	180	0.0110711504087746	62	1.72257338297688	63	1.58724966089524	NA	NA	8.1484	0.819223612990528
GAH1_2016	(BOFO_DGO123/PHZ51)/PHZ51_002-(2N)-002/LH195	81.6923	0.0113528165750976	14.4	1.86832475523075	0	150.222685206154	190	0.00553557465082976	58.8017	0.861309377435276	60.7785	0.793651480092556	NA	NA	11.4178	0.410053788903924
GAH1_2016	(CHANDELLE_CUB68_CI/PHZ51)/PHZ51_004-(2N)-001/LH195	110	0.0227047064274839	15.7	3.73664988412649	0.0236855	300.43631203104	210	0.0110711504087746	61.5	1.72257338297688	63	1.58724966089524	NA	NA	7.9855	0.840324763193505
GAH1_2016	(CML442-B/CML343-B-B-B-B-B-B)-B-B-1-1-B-B-B-1-B12-1-B19/LH19	105	0.0227047064274839	19.1	3.73664988412649	0.1811594	300.43631203104	215	0.0110711504087746	64	1.72257338297688	64.5	1.58724966089524	NA	NA	9.9557	0.832459404600812
GAH1_2016	(CML450-B/TX110)-B-3-B-1-B-B-1-1-B18-B21-B8/LH195	105	0.0227047064274839	19.85	3.73664988412649	0.0514706	300.43631203104	210	0.0110711504087746	61.5	1.72257338297688	64	1.58724966089524	NA	NA	11.1222	0.838379566982409
GAH1_2016	(DULCILLO_DEL_NO_SON57/PHZ51)/PHZ51_002-(2N)-003/LH195	85	0.0227047064274839	15.7	3.73664988412649	0.0204082	300.43631203104	190	0.0110711504087746	62.5	1.72257338297688	63.5	1.58724966089524	NA	NA	9.0644	0.83372801082544
GAH1_2016	(ELOTES_OCCIDENT_NAY29/PHZ51)/PHZ51_002-(2N)-001/LH195	105	0.0227047064274839	16.85	3.73664988412649	0.0104167	300.43631203104	210	0.0110711504087746	64	1.72257338297688	64	1.58724966089524	NA	NA	8.9973	0.830345060893099
GAH1_2016	(ELOTES_OCCIDENT_NAY29/PHZ51)/PHZ51_004-(2N)-004/LH195	85	0.0227047064274839	15.35	3.73664988412649	0.0119048	300.43631203104	180	0.0110711504087746	63.5	1.72257338297688	62.5	1.58724966089524	NA	NA	8.636	0.826370094722598
GAH1_2016	(KARAPAMPA_BOV978/PHZ51)/PHZ51_003-(2N)-001/LH195	95	0.0227047064274839	15	3.73664988412649	0.0166667	300.43631203104	210	0.0110711504087746	59	1.72257338297688	61	1.58724966089524	NA	NA	10.2649	0.84146650879567
GAH1_2016	(KARAPAMPA_BOV978/PHZ51)/PHZ51_003-(2N)-002/LH195	115	0.0227047064274839	16.2	3.73664988412649	0.0083333	300.43631203104	230	0.0110711504087746	62.5	1.72257338297688	63	1.58724966089524	NA	NA	8.9437	0.84146650879567
GAH1_2016	(KARAPAMPA_BOV978/PHZ51)/PHZ51_003-(2N)-006/LH195	85	0.0227047064274839	15.15	3.73664988412649	0.0558158	300.43631203104	185	0.0110711504087746	62	1.72257338297688	62	1.58724966089524	NA	NA	8.5428	0.836476657645467
GAH1_2016	(KARAPAMPA_BOV978/PHZ51)/PHZ51_003-(2N)-007/LH195	105	0.0227047064274839	15.8	3.73664988412649	0.0106383	300.43631203104	215	0.0110711504087746	60.5	1.72257338297688	62	1.58724966089524	NA	NA	9.9964	0.832924560216509
GAH1_2016	(ONAVENO_SON24/PHZ51)/PHZ51_004-(2N)-001/LH195	105	0.0227047064274839	15.3	3.73664988412649	0.031746	300.43631203104	225	0.0110711504087746	64	1.72257338297688	64.5	1.58724966089524	NA	NA	8.0961	0.841212787550744
GAH1_2016	(ONAVENO_SON24/PHZ51)/PHZ51_005-(2N)-002/LH195	95	0.0227047064274839	16.65	3.73664988412649	0.09375	300.43631203104	205	0.0110711504087746	60	1.72257338297688	61	1.58724966089524	NA	NA	9.7625	0.84146650879567
GAH1_2016	(PHZ51/CON_PN_CUZ13)/PHZ51_007-(2N)-001/LH195	85	0.0227047064274839	14.9	3.73664988412649	1.0625181e-17	300.43631203104	175	0.0110711504087746	60	1.72257338297688	61	1.58724966089524	NA	NA	8.4806	0.813726319350474
GAH1_2016	(PHZ51/KCELO_BOV948)/PHZ51_001-(2N)-002/LH195	85	0.0227047064274839	15.35	3.73664988412649	1.0625181e-17	300.43631203104	190	0.0110711504087746	62	1.72257338297688	63.5	1.58724966089524	NA	NA	6.8381	0.84146650879567
GAH1_2016	(PHZ51/KCELO_BOV948)/PHZ51_003-(2N)-001/LH195	100	0.0227047064274839	16	3.73664988412649	0.0272727	300.43631203104	210	0.0110711504087746	61	1.72257338297688	61	1.58724966089524	NA	NA	11.0614	0.832078822733424
GAH1_2016	(PHZ51/MISHC_ECU321)/PHZ51_004-(2N)-002/LH195	85	0.0227047064274839	15.25	3.73664988412649	1.3877788e-17	300.43631203104	190	0.0110711504087746	62	1.72257338297688	62	1.58724966089524	NA	NA	8.6895	0.810766238159675
GAH1_2016	(PHZ51/PISAN_BOV344)/PHZ51_001-(2N)-002/LH195	90	0.0227047064274839	15.75	3.73664988412649	0.0078125	300.43631203104	185	0.0110711504087746	61	1.72257338297688	62	1.58724966089524	NA	NA	5.3092	0.84146650879567
GAH1_2016	(PHZ51/PISAN_BOV344)/PHZ51_001-(2N)-003/LH195	110	0.0227047064274839	17.2	3.73664988412649	0.0909091	300.43631203104	215	0.0110711504087746	62.5	1.72257338297688	63	1.58724966089524	NA	NA	7.409	0.839986468200271
GAH1_2016	(PHZ51/PISAN_BOV344)/PHZ51_001-(2N)-004/LH195	85	0.0227047064274839	15.3	3.73664988412649	1.0625181e-17	300.43631203104	185	0.0110711504087746	61	1.72257338297688	61	1.58724966089524	NA	NA	7.3535	0.839098443843031
GAH1_2016	(PHZ51/PISAN_BOV344)/PHZ51_001-(2N)-005/LH195	110	0.0227047064274839	16.7	3.73664988412649	0.0377727	300.43631203104	205	0.0110711504087746	60.5	1.72257338297688	61.5	1.58724966089524	NA	NA	8.5936	0.838379566982409
GAH1_2016	(PHZ51/PISAN_BOV344)/PHZ51_001-(2N)-006/LH195	85	0.0227047064274839	16.35	3.73664988412649	0.1331436	300.43631203104	190	0.0110711504087746	59	1.72257338297688	60	1.58724966089524	NA	NA	8.8797	0.840747631935047
GAH1_2016	(PHZ51/PISAN_BOV344)/PHZ51_002-(2N)-002/LH195	105	0.0227047064274839	14.95	3.73664988412649	1.4094628e-17	300.43631203104	220	0.0110711504087746	61.5	1.72257338297688	61.5	1.58724966089524	NA	NA	9.2855	0.805987821380244
GAH1_2016	(PHZ51/PISAN_BOV344)/PHZ51_003-(2N)-001/LH195	100	0.0227047064274839	14.5	3.73664988412649	0.0948276	300.43631203104	205	0.0110711504087746	61	1.72257338297688	61.5	1.58724966089524	NA	NA	9.2129	0.841128213802436
GAH1_2016	(PIRA_TOL405/PHZ51)/PHZ51_002-(2N)-001/LH195	105	0.0227047064274839	17.05	3.73664988412649	0.0382319	300.43631203104	200	0.0110711504087746	61.5	1.72257338297688	62	1.58724966089524	NA	NA	8.959	0.838379566982409
GAH1_2016	(POJ_CHICO_BOV800/PHZ51)/PHZ51_001-(2N)-001/LH195	90	0.0227047064274839	16.85	3.73664988412649	1.4094628e-17	300.43631203104	200	0.0110711504087746	61	1.72257338297688	63	1.58724966089524	NA	NA	7.9634	0.835165764546685
GAH1_2016	(YUCATAN_TOL389_ICA/PHZ51)/PHZ51_005-(2N)-001/LH195	105	0.0227047064274839	16.35	3.73664988412649	0.1034483	300.43631203104	210	0.0110711504087746	61.5	1.72257338297688	62	1.58724966089524	NA	NA	9.101	0.84146650879567
GAH1_2016	(YUCATAN_TOL389_ICA/PHZ51)/PHZ51_005-(2N)-002/LH195	110	0.0227047064274839	15.1	3.73664988412649	0.0242063	300.43631203104	205	0.0110711504087746	60	1.72257338297688	60	1.58724966089524	NA	NA	10.4426	0.841212787550744
GAH1_2016	(YUNGUENO_BOV362/PHZ51)/PHZ51_004-(2N)-001/LH195	105	0.0227047064274839	15.45	3.73664988412649	0.0357143	300.43631203104	220	0.0110711504087746	61.5	1.72257338297688	61.5	1.58724966089524	NA	NA	10.75	0.841339648173207
GAH1_2016	(YUNGUENO_BOV362/PHZ51)/PHZ51_006-(2N)-002/LH195	101.6923	0.0113528165750976	14.5	1.86832475523075	0	150.222685206154	200	0.00553557465082976	60.8017	0.861309377435276	60.7785	0.793651480092556	NA	NA	8.1649	0.420129355548038
GAH1_2016	2369/3IIH6	95	0.0227047064274839	13.35	3.73664988412649	0.057971	300.43631203104	200	0.0110711504087746	55.5	1.72257338297688	56	1.58724966089524	NA	NA	8.4647	0.839267591339648
GAH1_2016	2369/LH123HT	95	0.0227047064274839	14.6	3.73664988412649	0.0678516	300.43631203104	215	0.0110711504087746	59	1.72257338297688	61	1.58724966089524	NA	NA	7.6257	0.837322395128552
GAH1_2016	2369/PHZ51	100	0.0227047064274839	14.15	3.73664988412649	0.0208333	300.43631203104	200	0.0110711504087746	58	1.72257338297688	60	1.58724966089524	NA	NA	7.0682	0.832459404600812
GAH1_2016	B14A/H95	90	0.0227047064274839	14.55	3.73664988412649	0.3139138	300.43631203104	195	0.0110711504087746	58.5	1.72257338297688	59	1.58724966089524	NA	NA	7.271	0.835461772665765
GAH1_2016	B14A/MO17	100	0.0227047064274839	13.6	3.73664988412649	0.3241342	300.43631203104	200	0.0110711504087746	58	1.72257338297688	60	1.58724966089524	NA	NA	8.1132	0.841339648173207
GAH1_2016	B14A/OH43	100	0.0227047064274839	14.8	3.73664988412649	0.1377841	300.43631203104	210	0.0110711504087746	56.5	1.72257338297688	57	1.58724966089524	NA	NA	8.5308	0.839267591339648
GAH1_2016	B37/H95	75	0.0227047064274839	15.8	3.73664988412649	0.0621986	300.43631203104	185	0.0110711504087746	59	1.72257338297688	61	1.58724966089524	NA	NA	5.564	0.839648173207037
GAH1_2016	B37/MO17	100	0.0227047064274839	14.9	3.73664988412649	0.2719616	300.43631203104	200	0.0110711504087746	58	1.72257338297688	61.5	1.58724966089524	NA	NA	6.5764	0.835461772665765
GAH1_2016	B37/OH43	85	0.0227047064274839	15.3	3.73664988412649	0.0329043	300.43631203104	185	0.0110711504087746	57	1.72257338297688	60	1.58724966089524	NA	NA	6.8005	0.839648173207037
GAH1_2016	B47/PHZ51	77.5	0.0451663193358639	14.05	7.47329976825297	0.1250547	597.838066337546	195	0.0221423008175491	56	3.42670361070223	57.25	3.157344610229	NA	NA	5.9333	1.67333389715832
GAH1_2016	B73/3IIH6	95	0.0227047064274839	13.65	3.73664988412649	0.1014493	300.43631203104	175	0.0110711504087746	57.5	1.72257338297688	58	1.58724966089524	NA	NA	7.7614	0.840832205683356
GAH1_2016	B73/LH162	80	0.0227047064274839	14.35	3.73664988412649	0.0075758	300.43631203104	190	0.0110711504087746	57	1.72257338297688	59	1.58724966089524	NA	NA	6.1812	0.839986468200271
GAH1_2016	B73/MO17	100	0.0227047064274839	13.5	3.73664988412649	0.2048167	300.43631203104	200	0.0110711504087746	58	1.72257338297688	61.5	1.58724966089524	NA	NA	7.6837	0.835461772665765
GAH1_2016	B73/PHM49	100	0.0227047064274839	15.15	3.73664988412649	1.517883e-18	300.43631203104	210	0.0110711504087746	61	1.72257338297688	62	1.58724966089524	NA	NA	9.5324	0.838633288227334
GAH1_2016	B73/PHN82	90	0.0227047064274839	15.8	3.73664988412649	0.0322581	300.43631203104	200	0.0110711504087746	59	1.72257338297688	61	1.58724966089524	NA	NA	11.0706	0.838844722598106
GAH1_2016	B73/PHZ51	95	0.0451663193358639	14.625	7.47329976825297	0.0566951	597.838066337546	207.5	0.0221423008175491	57.75	3.42670361070223	60	3.157344610229	NA	NA	8.1374	1.65426251691475
GAH1_2016	B73/TX6252	90	0.0227047064274839	15.5	3.73664988412649	0.0508333	300.43631203104	195	0.0110711504087746	56.5	1.72257338297688	59.5	1.58724966089524	NA	NA	9.349	0.832924560216509
GAH1_2016	B73/TX777	110	0.0227047064274839	16.4	3.73664988412649	1.2576745e-17	300.43631203104	215	0.0110711504087746	61	1.72257338297688	61.5	1.58724966089524	NA	NA	11.7859	0.819223612990528
GAH1_2016	B97/B47	95	0.0227047064274839	13.7	3.73664988412649	0.2879917	300.43631203104	190	0.0110711504087746	55.5	1.72257338297688	55.5	1.58724966089524	NA	NA	6.0765	0.83402401894452
GAH1_2016	BR105:N(PHZ51)(PHZ51)-(2N)-001/LH195	81.6923	0.0113528165750976	15.3	1.86832475523075	0	150.222685206154	170	0.00553557465082976	61.8017	0.861309377435276	63.7785	0.793651480092556	NA	NA	8.5407	0.413356816644114
GAH1_2016	BR105:N(PHZ51)(PHZ51)-(2N)-003/LH195	110	0.0227047064274839	16.5	3.73664988412649	1.7564075e-17	300.43631203104	210	0.0110711504087746	61	1.72257338297688	62	1.58724966089524	NA	NA	9.2497	0.839267591339648
GAH1_2016	CG108/CGR03	70	0.0227047064274839	13.65	3.73664988412649	0.0975096	300.43631203104	160	0.0110711504087746	52	1.72257338297688	52	1.58724966089524	NA	NA	6.4693	0.836476657645467
GAH1_2016	CG44/CGR01	60	0.0227047064274839	13.85	3.73664988412649	0.0142857	300.43631203104	145	0.0110711504087746	52	1.72257338297688	52	1.58724966089524	NA	NA	4.0403	0.83402401894452
GAH1_2016	CG60/LH162	65	0.0227047064274839	13.3	3.73664988412649	0.0220588	300.43631203104	145	0.0110711504087746	51.5	1.72257338297688	51.5	1.58724966089524	NA	NA	4.0587	0.84057848443843
GAH1_2016	CML269/LH195	110	0.0227047064274839	19.5	3.73664988412649	0.1626925	300.43631203104	200	0.0110711504087746	63	1.72257338297688	62.5	1.58724966089524	NA	NA	9.1063	0.840324763193505
GAH1_2016	CUBA164:N(PHZ51)(PHZ51)-(2N)-002/LH195	110	0.0227047064274839	16.9	3.73664988412649	0.15	300.43631203104	225	0.0110711504087746	61	1.72257338297688	62	1.58724966089524	NA	NA	8.5296	0.837872124492558
GAH1_2016	F42/H95	95	0.0227047064274839	14.8	3.73664988412649	1.7564075e-17	300.43631203104	195	0.0110711504087746	59	1.72257338297688	62	1.58724966089524	NA	NA	6.5218	0.841424221921516
GAH1_2016	F42/MO17	95	0.0227047064274839	14.5	3.73664988412649	0.0238095	300.43631203104	210	0.0110711504087746	58	1.72257338297688	60.5	1.58724966089524	NA	NA	9.372	0.839986468200271
GAH1_2016	F42/OH43	75	0.0227047064274839	14.35	3.73664988412649	0.0142857	300.43631203104	175	0.0110711504087746	55.5	1.72257338297688	59	1.58724966089524	NA	NA	5.6653	0.836730378890392
GAH1_2016	GEMN-0260/3IIH6	85	0.0227047064274839	13.6	3.73664988412649	1.7564075e-17	300.43631203104	185	0.0110711504087746	55.5	1.72257338297688	55.5	1.58724966089524	NA	NA	9.4589	0.83947902571042
GAH1_2016	GEMN-0262/3IIH6	90	0.0227047064274839	14.25	3.73664988412649	0.0434783	300.43631203104	200	0.0110711504087746	56	1.72257338297688	58	1.58724966089524	NA	NA	8.3219	0.837322395128552
GAH1_2016	GEMN-0268/3IIH6	100	0.0227047064274839	15.2	3.73664988412649	0.2716734	300.43631203104	215	0.0110711504087746	56	1.72257338297688	56	1.58724966089524	NA	NA	10.3635	0.84057848443843
GAH1_2016	GEMN-0269/3IIH6	70	0.0227047064274839	13.35	3.73664988412649	0.3079832	300.43631203104	175	0.0110711504087746	55	1.72257338297688	55.5	1.58724966089524	NA	NA	6.6449	0.834785182679296
GAH1_2016	GEMS-0150/PHZ51	100	0.0227047064274839	15.1	3.73664988412649	0.0554559	300.43631203104	225	0.0110711504087746	60	1.72257338297688	60	1.58724966089524	NA	NA	8.7622	0.840832205683356
GAH1_2016	GEMS-0163/PHZ51	125	0.0227047064274839	14.2	3.73664988412649	0.0599311	300.43631203104	235	0.0110711504087746	59	1.72257338297688	61.5	1.58724966089524	NA	NA	9.1222	0.838379566982409
GAH1_2016	LH123HT/3IIH6	95	0.0227047064274839	13.75	3.73664988412649	0.1464357	300.43631203104	220	0.0110711504087746	59	1.72257338297688	59	1.58724966089524	NA	NA	7.6848	0.840324763193505
GAH1_2016	LH195/LH123HT	100	0.0227047064274839	16.6	3.73664988412649	0.0075758	300.43631203104	220	0.0110711504087746	61	1.72257338297688	61.5	1.58724966089524	NA	NA	11.2882	0.839648173207037
GAH1_2016	LH195/LH185	70	0.0227047064274839	16.25	3.73664988412649	0.0153846	300.43631203104	180	0.0110711504087746	60	1.72257338297688	61.5	1.58724966089524	NA	NA	7.2514	0.838379566982409
GAH1_2016	LH195/LH210	100	0.0227047064274839	16.45	3.73664988412649	1.7564075e-17	300.43631203104	215	0.0110711504087746	61.5	1.72257338297688	62.5	1.58724966089524	NA	NA	11.3416	0.839267591339648
GAH1_2016	LH195/NK787	85	0.0227047064274839	18.35	3.73664988412649	1.7564075e-17	300.43631203104	210	0.0110711504087746	61.5	1.72257338297688	62.5	1.58724966089524	NA	NA	11.4902	0.841424221921516
GAH1_2016	LH195/PHJ65	90	0.0227047064274839	18.2	3.73664988412649	3.469447e-18	300.43631203104	210	0.0110711504087746	64	1.72257338297688	64.5	1.58724966089524	NA	NA	10.4878	0.84057848443843
GAH1_2016	LH195/PHM49	95	0.0227047064274839	16.75	3.73664988412649	0.0151515	300.43631203104	190	0.0110711504087746	61.5	1.72257338297688	63	1.58724966089524	NA	NA	10.9316	0.838379566982409
GAH1_2016	LH195/PHN47	100	0.0227047064274839	17.8	3.73664988412649	1.0408341e-17	300.43631203104	215	0.0110711504087746	61.5	1.72257338297688	62.5	1.58724966089524	NA	NA	11.6316	0.838379566982409
GAH1_2016	LH195/PHN82	80	0.0227047064274839	17.95	3.73664988412649	1.7347235e-17	300.43631203104	170	0.0110711504087746	61	1.72257338297688	63	1.58724966089524	NA	NA	8.6371	0.841381935047361
GAH1_2016	LH195/PHP60	90	0.0227047064274839	17.85	3.73664988412649	1.0625181e-17	300.43631203104	195	0.0110711504087746	62	1.72257338297688	62.5	1.58724966089524	NA	NA	11.1094	0.841297361299053
GAH1_2016	LH195/PHR03	95	0.0227047064274839	17.5	3.73664988412649	1.7564075e-17	300.43631203104	210	0.0110711504087746	64	1.72257338297688	65.5	1.58724966089524	NA	NA	10.2842	0.84146650879567
GAH1_2016	LH195/PHR63	75	0.0227047064274839	18.3	3.73664988412649	1.0408341e-17	300.43631203104	180	0.0110711504087746	59	1.72257338297688	60	1.58724966089524	NA	NA	10.2492	0.839648173207037
GAH1_2016	LH195/PHW30	90	0.0227047064274839	15.8	3.73664988412649	1.7564075e-17	300.43631203104	210	0.0110711504087746	61.5	1.72257338297688	63.5	1.58724966089524	NA	NA	10.0834	0.840959066305819
GAH1_2016	LH195/PHW53	90	0.0227047064274839	15.65	3.73664988412649	0.0214286	300.43631203104	190	0.0110711504087746	59	1.72257338297688	61.5	1.58724966089524	NA	NA	10.0642	0.836138362652233
GAH1_2016	LH195/PHZ51	90	0.0451663193358639	14.9	7.47329976825297	0.0339478	597.838066337546	187.5	0.0221423008175491	60.5	3.42670361070223	61.5	3.157344610229	NA	NA	7.6598	1.67439106901218
GAH1_2016	LH195/Q381	80	0.0227047064274839	15.25	3.73664988412649	1.7564075e-17	300.43631203104	165	0.0110711504087746	57.5	1.72257338297688	60.5	1.58724966089524	NA	NA	9.4546	0.840197902571042
GAH1_2016	LH198/PHZ51	85	0.0227047064274839	14.5	3.73664988412649	0.0294118	300.43631203104	205	0.0110711504087746	59	1.72257338297688	60	1.58724966089524	NA	NA	7.7683	0.837872124492558
GAH1_2016	LH212HT/LH195	95	0.0227047064274839	14.95	3.73664988412649	0.0298507	300.43631203104	210	0.0110711504087746	60	1.72257338297688	60	1.58724966089524	NA	NA	10.0037	0.835461772665765
GAH1_2016	LH216/LH195	105	0.0227047064274839	16.4	3.73664988412649	0.0220588	300.43631203104	210	0.0110711504087746	61	1.72257338297688	63.5	1.58724966089524	NA	NA	10.923	0.835461772665765
GAH1_2016	LH74/PHN82	85	0.0227047064274839	15.45	3.73664988412649	0.0090909	300.43631203104	175	0.0110711504087746	56.5	1.72257338297688	59	1.58724966089524	NA	NA	8.8058	0.841424221921516
GAH1_2016	LH82/LH195	80	0.0227047064274839	14.85	3.73664988412649	0.0302006	300.43631203104	170	0.0110711504087746	59	1.72257338297688	61	1.58724966089524	NA	NA	8.8379	0.838844722598106
GAH1_2016	MO17/3IIH6	90	0.0227047064274839	13.4	3.73664988412649	0.0311625	300.43631203104	195	0.0110711504087746	55	1.72257338297688	56	1.58724966089524	671.2671	0.000676384142173616	7.3809	0.838844722598106
GAH1_2016	MO17/PHZ51	90	0.0227047064274839	14.05	3.73664988412649	0.1514706	300.43631203104	195	0.0110711504087746	57.5	1.72257338297688	60.5	1.58724966089524	737.5571	0.000676384142173616	7.1616	0.834785182679296
GAH1_2016	PB80/PHZ51	95	0.0227047064274839	14.35	3.73664988412649	0.0907579	300.43631203104	200	0.0110711504087746	58	1.72257338297688	60	1.58724966089524	778.7471	0.000676384142173616	8.8694	0.839267591339648
GAH1_2016	PHG29/PHG47	85	0.0227047064274839	14.25	3.73664988412649	0.0947479	300.43631203104	180	0.0110711504087746	55	1.72257338297688	55	1.58724966089524	693.7928	0.000676384142173616	6.5662	0.834785182679296
GAH1_2016	PHG39/PHN82	85	0.0227047064274839	17.5	3.73664988412649	5.6378513e-18	300.43631203104	190	0.0110711504087746	61	1.72257338297688	62	1.58724966089524	771.6675	0.000676384142173616	9.281	0.840324763193505
GAH1_2016	PHG39/TX205	105	0.0227047064274839	16.25	3.73664988412649	0.0414741	300.43631203104	215	0.0110711504087746	61.5	1.72257338297688	63	1.58724966089524	722.7545	0.000676384142173616	9.4158	0.840832205683356
GAH1_2016	PHG80/PHZ51	80	0.0227047064274839	14	3.73664988412649	0.0152074	300.43631203104	190	0.0110711504087746	57	1.72257338297688	59	1.58724966089524	688.0005	0.000676384142173616	8.2249	0.838379566982409
GAH1_2016	PHN11_OH43_0001/B47	80	0.0227047064274839	13.75	3.73664988412649	0.3482143	300.43631203104	205	0.0110711504087746	55.5	1.72257338297688	56	1.58724966089524	780.0343	0.000676384142173616	7.7645	0.840493910690122
GAH1_2016	PHN11_PHG47_0251/B47	80	0.0227047064274839	13.85	3.73664988412649	0.0633803	300.43631203104	195	0.0110711504087746	57.5	1.72257338297688	57.5	1.58724966089524	697.6544	0.000676384142173616	6.6645	0.838379566982409
GAH1_2016	PHN11_PHW65_0323/LH195	85	0.0227047064274839	17.25	3.73664988412649	1.7347235e-17	300.43631203104	180	0.0110711504087746	61	1.72257338297688	62	1.58724966089524	753.647	0.000676384142173616	8.4736	0.834785182679296
GAH1_2016	PHP02/B47	90	0.0227047064274839	13.9	3.73664988412649	0.0762712	300.43631203104	205	0.0110711504087746	55	1.72257338297688	55	1.58724966089524	693.1492	0.000676384142173616	8.4067	0.841424221921516
GAH1_2016	PHP38/LH123HT	95	0.0227047064274839	15.6	3.73664988412649	0.0074627	300.43631203104	210	0.0110711504087746	60	1.72257338297688	60.5	1.58724966089524	762.6573	0.000676384142173616	9.0679	0.839267591339648
GAH1_2016	PHP38/LH185	80	0.0227047064274839	14.85	3.73664988412649	0.0196078	300.43631203104	195	0.0110711504087746	59	1.72257338297688	59	1.58724966089524	739.4879	0.000676384142173616	10.34	0.832924560216509
GAH1_2016	PHP38/LH210	100	0.0227047064274839	15.25	3.73664988412649	0.0298507	300.43631203104	210	0.0110711504087746	58	1.72257338297688	59	1.58724966089524	789.0445	0.000676384142173616	11.4433	0.840324763193505
GAH1_2016	PHP38/PHJ65	90	0.0227047064274839	17.6	3.73664988412649	0.0272727	300.43631203104	215	0.0110711504087746	59	1.72257338297688	61.5	1.58724966089524	751.0726	0.000676384142173616	8.3815	0.840747631935047
GAH1_2016	PHP38/PHM49	70	0.0227047064274839	17.35	3.73664988412649	1.0625181e-17	300.43631203104	175	0.0110711504087746	60.5	1.72257338297688	62.5	1.58724966089524	712.457	0.000676384142173616	9.1737	0.835842354533153
GAH1_2016	PHP38/PHN47	100	0.0227047064274839	16.4	3.73664988412649	1.7347235e-17	300.43631203104	210	0.0110711504087746	61.5	1.72257338297688	62	1.58724966089524	821.8678	0.000676384142173616	10.7801	0.828399864682003
GAH1_2016	PHP38/PHN82	80	0.0227047064274839	17.45	3.73664988412649	3.469447e-18	300.43631203104	185	0.0110711504087746	60	1.72257338297688	61.5	1.58724966089524	749.1418	0.000676384142173616	9.9689	0.839267591339648
GAH1_2016	PHP38/PHP60	90	0.0227047064274839	16.1	3.73664988412649	0.087963	300.43631203104	210	0.0110711504087746	59	1.72257338297688	59	1.58724966089524	778.7471	0.000676384142173616	10.1363	0.835842354533153
GAH1_2016	PHP38/PHR03	95	0.0227047064274839	15.45	3.73664988412649	0.0480159	300.43631203104	195	0.0110711504087746	61	1.72257338297688	62	1.58724966089524	736.27	0.000676384142173616	11.0029	0.841212787550744
GAH1_2016	PHP38/PHR63	75	0.0227047064274839	18.6	3.73664988412649	3.469447e-18	300.43631203104	180	0.0110711504087746	60	1.72257338297688	60.5	1.58724966089524	758.7957	0.000676384142173616	8.8863	0.840493910690122
GAH1_2016	PHP38/PHW30	95	0.0227047064274839	15.65	3.73664988412649	1.7347235e-17	300.43631203104	210	0.0110711504087746	59	1.72257338297688	61.5	1.58724966089524	800.6292	0.000676384142173616	9.903	0.832924560216509
GAH1_2016	PHP38/PHW53	90	0.0227047064274839	14.65	3.73664988412649	0.0079365	300.43631203104	205	0.0110711504087746	57	1.72257338297688	59	1.58724966089524	737.5571	0.000676384142173616	11.0809	0.841212787550744
GAH1_2016	PHP38/Q381	75	0.0227047064274839	14.15	3.73664988412649	1.7564075e-17	300.43631203104	160	0.0110711504087746	56.5	1.72257338297688	58	1.58724966089524	737.5571	0.000676384142173616	8.1822	0.830345060893099
GAH1_2016	PHV63/LH123HT	95	0.0227047064274839	15.55	3.73664988412649	0.0384615	300.43631203104	200	0.0110711504087746	59	1.72257338297688	60	1.58724966089524	767.1624	0.000676384142173616	10.6638	0.835165764546685
GAH1_2016	PHV63/LH185	70	0.0227047064274839	14.35	3.73664988412649	0.0583333	300.43631203104	160	0.0110711504087746	56.5	1.72257338297688	59	1.58724966089524	761.3701	0.000676384142173616	6.578	0.84146650879567
GAH1_2016	PHV63/LH210	85	0.0227047064274839	15.05	3.73664988412649	0.0431034	300.43631203104	180	0.0110711504087746	60	1.72257338297688	60.5	1.58724966089524	790.9753	0.000676384142173616	8.4773	0.84146650879567
GAH1_2016	PHV63/NK787	85	0.0227047064274839	17.9	3.73664988412649	0.0491803	300.43631203104	200	0.0110711504087746	61.5	1.72257338297688	63	1.58724966089524	816.0754	0.000676384142173616	10.5052	0.840747631935047
GAH1_2016	PHV63/PHJ65	90	0.0227047064274839	17.05	3.73664988412649	0.1320755	300.43631203104	215	0.0110711504087746	61.5	1.72257338297688	62	1.58724966089524	808.3523	0.000676384142173616	9.3156	0.840747631935047
GAH1_2016	PHV63/PHM49	70	0.0227047064274839	15.8	3.73664988412649	0.01	300.43631203104	170	0.0110711504087746	61	1.72257338297688	62	1.58724966089524	721.4673	0.000676384142173616	10.5074	0.837618403247632
GAH1_2016	PHV63/PHM57	80	0.0227047064274839	16	3.73664988412649	0.0731707	300.43631203104	195	0.0110711504087746	61.5	1.72257338297688	62.5	1.58724966089524	724.6853	0.000676384142173616	10.6314	0.826370094722598
GAH1_2016	PHV63/PHN47	90	0.0227047064274839	16.15	3.73664988412649	0.07172	300.43631203104	185	0.0110711504087746	61.5	1.72257338297688	62.5	1.58724966089524	737.5571	0.000676384142173616	7.5385	0.840747631935047
GAH1_2016	PHV63/PHN82	75	0.0227047064274839	15.1	3.73664988412649	0.0086207	300.43631203104	170	0.0110711504087746	60	1.72257338297688	61.5	1.58724966089524	848.2551	0.000676384142173616	6.8708	0.838633288227334
GAH1_2016	PHV63/PHP60	85	0.0227047064274839	15.45	3.73664988412649	0.221654	300.43631203104	190	0.0110711504087746	59	1.72257338297688	59	1.58724966089524	798.0548	0.000676384142173616	9.365	0.841381935047361
GAH1_2016	PHV63/PHR03	80	0.0227047064274839	15.05	3.73664988412649	0.0886027	300.43631203104	185	0.0110711504087746	56.5	1.72257338297688	59	1.58724966089524	762.6573	0.000676384142173616	6.9282	0.841043640054127
GAH1_2016	PHV63/PHR63	85	0.0227047064274839	15.75	3.73664988412649	0.0403226	300.43631203104	185	0.0110711504087746	57.5	1.72257338297688	58	1.58724966089524	753.647	0.000676384142173616	7.6591	0.841339648173207
GAH1_2016	PHV63/PHW30	90	0.0227047064274839	14.35	3.73664988412649	0.0454545	300.43631203104	190	0.0110711504087746	60	1.72257338297688	61.5	1.58724966089524	675.7722	0.000676384142173616	10.183	0.840959066305819
GAH1_2016	PHV63/PHW53	90	0.0227047064274839	14.4	3.73664988412649	0.0603239	300.43631203104	185	0.0110711504087746	58	1.72257338297688	60	1.58724966089524	742.0623	0.000676384142173616	8.5055	0.841339648173207
GAH1_2016	PHV63/PHZ51	90	0.0227047064274839	15.25	3.73664988412649	0.0345125	300.43631203104	185	0.0110711504087746	58	1.72257338297688	61	1.58724966089524	745.2803	0.000676384142173616	8.5029	0.84146650879567
GAH1_2016	PHV63/Q381	85	0.0227047064274839	14.05	3.73664988412649	0.0092593	300.43631203104	200	0.0110711504087746	55	1.72257338297688	55.5	1.58724966089524	673.1979	0.000676384142173616	8.9362	0.840197902571042
GAH1_2016	PHW52/LH185	80	0.0227047064274839	15.3	3.73664988412649	0.0083333	300.43631203104	195	0.0110711504087746	56	1.72257338297688	56.5	1.58724966089524	749.1418	0.000676384142173616	9.3434	0.841043640054127
GAH1_2016	PHW52/LH210	90	0.0227047064274839	16.3	3.73664988412649	2.4502969e-17	300.43631203104	195	0.0110711504087746	59	1.72257338297688	60	1.58724966089524	753.647	0.000676384142173616	11.038	0.839267591339648
GAH1_2016	PHW52/NK787	90	0.0227047064274839	18.35	3.73664988412649	0.0080645	300.43631203104	220	0.0110711504087746	60	1.72257338297688	61	1.58724966089524	729.834	0.000676384142173616	12.0657	0.841424221921516
GAH1_2016	PHW52/PHJ65	81.6923	0.0113528165750976	17.8	3.73664988412649	2.4502969e-17	300.43631203104	220	0.00553557465082976	59	1.72257338297688	61.5	1.58724966089524	753.0034	0.000676384142173616	11.0553	0.84057848443843
GAH1_2016	PHW52/PHM49	80	0.0451663193358639	16.65	7.47329976825297	1.7564075e-17	597.838066337546	180	0.0221423008175491	59.5	3.42670361070223	62	3.157344610229	776.8163	0.00133844839371155	9.6384	1.67417963464141
GAH1_2016	PHW52/PHN47	80	0.0227047064274839	16.9	3.73664988412649	5.6378513e-18	300.43631203104	175	0.0110711504087746	60	1.72257338297688	62	1.58724966089524	783.2522	0.000676384142173616	7.987	0.838168132611637
GAH1_2016	PHW52/PHN82	70	0.0451663193358639	16.2	7.47329976825297	1.7564075e-17	597.838066337546	182.5	0.0221423008175491	59	3.42670361070223	61.5	3.157344610229	786.792	0.00133844839371155	7.8977	1.67417963464141
GAH1_2016	PHW52/PHP60	80	0.0227047064274839	17.15	3.73664988412649	0.0185185	300.43631203104	205	0.0110711504087746	60	1.72257338297688	60.5	1.58724966089524	800.6292	0.000676384142173616	9.2822	0.840747631935047
GAH1_2016	PHW52/PHR03	85	0.0227047064274839	17	3.73664988412649	0.009434	300.43631203104	185	0.0110711504087746	60	1.72257338297688	62	1.58724966089524	697.6544	0.000676384142173616	12.2102	0.839098443843031
GAH1_2016	PHW52/PHR63	80	0.0227047064274839	19	3.73664988412649	1.9515639e-17	300.43631203104	180	0.0110711504087746	56.5	1.72257338297688	59	1.58724966089524	727.9032	0.000676384142173616	9.8138	0.841297361299053
GAH1_2016	PHW52/PHW30	95	0.0227047064274839	15	3.73664988412649	1.7564075e-17	300.43631203104	215	0.0110711504087746	59	1.72257338297688	60	1.58724966089524	849.5423	0.000676384142173616	11.2008	0.838633288227334
GAH1_2016	PHW52/PHW53	85	0.0227047064274839	15.75	3.73664988412649	1.2576745e-17	300.43631203104	195	0.0110711504087746	56.5	1.72257338297688	60	1.58724966089524	747.8546	0.000676384142173616	9.7207	0.840493910690122
GAH1_2016	PHW52/PHZ51	90	0.0227047064274839	15.3	3.73664988412649	1.2576745e-17	300.43631203104	200	0.0110711504087746	56.5	1.72257338297688	59	1.58724966089524	746.5674	0.000676384142173616	10.8107	0.840747631935047
GAH1_2016	PHW52/Q381	70	0.0227047064274839	14.4	3.73664988412649	1.9515639e-17	300.43631203104	175	0.0110711504087746	55	1.72257338297688	56	1.58724966089524	687.3569	0.000676384142173616	9.7454	0.840747631935047
GAH1_2016	PHW52/TX205	85	0.0227047064274839	17.55	3.73664988412649	1.2576745e-17	300.43631203104	205	0.0110711504087746	61	1.72257338297688	61.5	1.58724966089524	737.5571	0.000676384142173616	10.3573	0.836138362652233
GAH1_2016	PHW53/LH123HT	80	0.0227047064274839	16	3.73664988412649	0.0074627	300.43631203104	190	0.0110711504087746	59.5	1.72257338297688	61	1.58724966089524	731.7648	0.000676384142173616	7.9869	0.838844722598106
GAH1_2016	REDEAR-B/LH195	125	0.0227047064274839	19.05	3.73664988412649	0.152698	300.43631203104	225	0.0110711504087746	61	1.72257338297688	62.5	1.58724966089524	747.8546	0.000676384142173616	10.6997	0.838379566982409
GAH1_2016	TX303/TX777	120	0.0227047064274839	21	3.73664988412649	0.1399457	300.43631203104	230	0.0110711504087746	64	1.72257338297688	66.5	1.58724966089524	660.9696	0.000676384142173616	8.8033	0.809201623815968
GAH1_2016	TX6252/TX714	95	0.0227047064274839	15.35	3.73664988412649	0.0396825	300.43631203104	205	0.0110711504087746	56.5	1.72257338297688	60	1.58724966089524	684.7825	0.000676384142173616	8.3202	0.841424221921516
GAH1_2016	TX714/PHZ51	110	0.0227047064274839	14.1	3.73664988412649	0.2319326	300.43631203104	215	0.0110711504087746	59	1.72257338297688	61.5	1.58724966089524	794.8369	0.000676384142173616	5.8023	0.838379566982409
GAH1_2016	TX714/TX777	110	0.0227047064274839	17.7	3.73664988412649	1.2576745e-17	300.43631203104	225	0.0110711504087746	62	1.72257338297688	63	1.58724966089524	742.0623	0.000676384142173616	9.8045	0.840747631935047
GAH1_2016	TX740/LH195	105	0.0227047064274839	20.15	3.73664988412649	1.7564075e-17	300.43631203104	205	0.0110711504087746	63	1.72257338297688	64	1.58724966089524	734.9828	0.000676384142173616	9.1018	0.840197902571042
GAH1_2016	TX770/LH195	120	0.0227047064274839	17.2	3.73664988412649	0.0625611	300.43631203104	220	0.0110711504087746	64	1.72257338297688	66	1.58724966089524	671.2671	0.000676384142173616	9.7663	0.839986468200271
GAH1_2016	TX772W/LH195	100	0.0227047064274839	18.65	3.73664988412649	1.9515639e-17	300.43631203104	180	0.0110711504087746	62.5	1.72257338297688	63	1.58724966089524	746.5674	0.000676384142173616	9.3004	0.831233085250338
GAH1_2016	VA35/LH195	95	0.0227047064274839	16.9	3.73664988412649	0.057971	300.43631203104	195	0.0110711504087746	61	1.72257338297688	61	1.58724966089524	768.4496	0.000676384142173616	8.8789	0.837322395128552
GAH1_2016	W10005_0107/B47	75	0.0227047064274839	14.35	3.73664988412649	0.0606061	300.43631203104	165	0.0110711504087746	55	1.72257338297688	56.5	1.58724966089524	770.3804	0.000676384142173616	7.8209	0.838844722598106
GAH1_2016	W37A/B47	80	0.0227047064274839	14.15	3.73664988412649	0.6806203	300.43631203104	170	0.0110711504087746	54	1.72257338297688	54	1.58724966089524	686.0697	0.000676384142173616	3.5253	0.838844722598106
GAH1_2016	WF9/H95	85	0.0227047064274839	14.15	3.73664988412649	0.4723252	300.43631203104	185	0.0110711504087746	59	1.72257338297688	62	1.58724966089524	769.7368	0.000676384142173616	4.1781	0.839986468200271
GAH1_2016	Z030E0058/3IIH6	95	0.0227047064274839	14.2	3.73664988412649	0.0909091	300.43631203104	195	0.0110711504087746	59	1.72257338297688	59	1.58724966089524	809.6395	0.000676384142173616	8.3641	0.837872124492558
GAH1_2016	Z030E0059/3IIH6	95	0.0227047064274839	14.2	3.73664988412649	2.4502969e-17	300.43631203104	190	0.0110711504087746	62	1.72257338297688	62	1.58724966089524	739.4879	0.000676384142173616	4.9586	0.826370094722598
GAH1_2016	Z032E0081/3IIH6	90	0.0227047064274839	13.6	3.73664988412649	0.0615385	300.43631203104	175	0.0110711504087746	59	1.72257338297688	60.5	1.58724966089524	745.2803	0.000676384142173616	3.6589	0.841043640054127
GAH1_2016	Z033E0001/3IIH6	95	0.0227047064274839	13.75	3.73664988412649	0.0142857	300.43631203104	200	0.0110711504087746	55.5	1.72257338297688	56	1.58724966089524	777.4599	0.000676384142173616	6.0539	0.839648173207037
GAH1_2016	Z034E0042/3IIH6	80	0.0227047064274839	13.85	3.73664988412649	0.0705489	300.43631203104	185	0.0110711504087746	57	1.72257338297688	58.5	1.58724966089524	729.834	0.000676384142173616	4.7957	0.838633288227334
GAH1_2016	Z035E0047/3IIH6	95	0.0227047064274839	13.65	3.73664988412649	0.0455038	300.43631203104	195	0.0110711504087746	55	1.72257338297688	55	1.58724966089524	762.6573	0.000676384142173616	7.3696	0.836138362652233
GAH1_2016	Z037E0012/3IIH6	90	0.0227047064274839	14.1	3.73664988412649	0.015873	300.43631203104	195	0.0110711504087746	58.5	1.72257338297688	58.5	1.58724966089524	763.9444	0.000676384142173616	8.6479	0.841043640054127
GAH1_2016	Z037E0054/3IIH6	90	0.0227047064274839	13.6	3.73664988412649	0.1955645	300.43631203104	195	0.0110711504087746	57	1.72257338297688	59	1.58724966089524	775.5291	0.000676384142173616	5.1455	0.839859607577808
GAH1_2016	Z038E0057/3IIH6	90	0.0227047064274839	14.15	3.73664988412649	0.0423729	300.43631203104	195	0.0110711504087746	56.5	1.72257338297688	57.5	1.58724966089524	738.5335	0.000338205878332194	6.7045	0.841424221921516
GAH2_2016	((ARIZONA-LIB_16/PHZ51_B)/PHZ51)-(2N)-002PVP/LH195	NA	NA	NA	0.957393118843112	NA	NA	NA	NA	53	2.00760460548512	54.5	0.72757769012423	NA	NA	5.5226	0.638899539877301
GAH2_2016	((ARIZONA-LIB_16/PHZ51_B)/PHZ51)-(2N)-003/LH195	NA	NA	12.5	0.957393118843112	NA	NA	NA	NA	54	2.00760460548512	56	0.72757769012423	NA	NA	3.1505	0.638707822085889
GAH2_2016	((CHIRIMITO-VEN_703/PHZ51_B)/PHZ51)-(2N)-001/LH195	NA	NA	NA	0.957393118843112	NA	NA	NA	NA	54	2.00760460548512	56	0.72757769012423	NA	NA	5.1029	0.635672290388548
GAH2_2016	((JORA-ANC1/PHZ51B)/PHZ51)-(2N)-002/LH195	NA	NA	NA	0.479358421895472	NA	NA	NA	NA	56	1.00380220236233	55.7292	0.364296826040476	NA	NA	5.8685	0.31949865797546
GAH2_2016	((PHZ51/JALA-JAL44)/PHZ51)-(2N)-001/LH195	NA	NA	NA	0.957393118843112	NA	NA	NA	NA	53.5	2.00760460548512	56	0.72757769012423	NA	NA	5.8821	0.639059304703476
GAH2_2016	((TUXPENO-GUA_456/PHZ51_B)/PHZ51)-(2N)-002/LH195	NA	NA	13.75	0.957393118843112	NA	NA	NA	NA	55.5	2.00760460548512	56	0.72757769012423	NA	NA	4.6508	0.633755112474438
GAH2_2016	(ALTIPLANO_BOV903/PHZ51)/PHZ51_002-(2N)-003/LH195	NA	NA	NA	0.957393118843112	NA	NA	NA	NA	53.5	2.00760460548512	57	0.72757769012423	NA	NA	4.5054	0.620750255623722
GAH2_2016	(BOFO_DGO123/PHZ51)/PHZ51_002-(2N)-002/LH195	NA	NA	NA	0.957393118843112	NA	NA	NA	NA	53.5	2.00760460548512	53.5	0.72757769012423	NA	NA	6.9844	0.576080010224949
GAH2_2016	(CML442-B/CML343-B-B-B-B-B-B)-B-B-1-1-B-B-B-1-B12-1-B19/LH19	NA	NA	NA	0.478035667491629	NA	NA	NA	NA	61	1.00380220236233	NA	NA	NA	NA	2.9845	0.314413503323108
GAH2_2016	(DULCILLO_DEL_NO_SON57/PHZ51)/PHZ51_002-(2N)-003/LH195	NA	NA	14.1	0.957393118843112	NA	NA	NA	NA	53	2.00760460548512	53.5	0.72757769012423	NA	NA	8.3821	0.636503067484663
GAH2_2016	(ELOTES_OCCIDENT_NAY29/PHZ51)/PHZ51_004-(2N)-004/LH195	NA	NA	12.7724	0.479358421895472	NA	NA	NA	NA	59	1.00380220236233	63.7292	0.364296826040476	NA	NA	2.3415	0.317873913599182
GAH2_2016	(KARAPAMPA_BOV978/PHZ51)/PHZ51_003-(2N)-001/LH195	NA	NA	NA	0.479358421895472	NA	NA	NA	NA	53	1.00380220236233	54.7292	0.364296826040476	NA	NA	4.3429	0.319089340490798
GAH2_2016	(KARAPAMPA_BOV978/PHZ51)/PHZ51_003-(2N)-002/LH195	NA	NA	13	0.957393118843112	NA	NA	NA	NA	54.5	2.00760460548512	58.5	0.72757769012423	NA	NA	4.8021	0.634713701431493
GAH2_2016	(KARAPAMPA_BOV978/PHZ51)/PHZ51_003-(2N)-006/LH195	NA	NA	13.3724	0.479358421895472	NA	NA	NA	NA	55	1.00380220236233	52.7292	0.364296826040476	NA	NA	4.755	0.31949865797546
GAH2_2016	(KARAPAMPA_BOV978/PHZ51)/PHZ51_003-(2N)-007/LH195	NA	NA	14.35	0.957393118843112	NA	NA	NA	NA	52.5	2.00760460548512	54	0.72757769012423	NA	NA	8.4244	0.635672290388548
GAH2_2016	(ONAVENO_SON24/PHZ51)/PHZ51_004-(2N)-001/LH195	NA	NA	12.65	0.957393118843112	NA	NA	NA	NA	55.5	2.00760460548512	56.5	0.72757769012423	NA	NA	8.2681	0.637877044989775
GAH2_2016	(ONAVENO_SON24/PHZ51)/PHZ51_005-(2N)-002/LH195	NA	NA	14.75	0.957393118843112	NA	NA	NA	NA	51.5	2.00760460548512	52.5	0.72757769012423	NA	NA	6.173	0.633755112474438
GAH2_2016	(PHZ51/CON_PN_CUZ13)/PHZ51_007-(2N)-001/LH195	NA	NA	14.25	0.957393118843112	NA	NA	NA	NA	54	2.00760460548512	55.5	0.72757769012423	NA	NA	5.229	0.61394427402863
GAH2_2016	(PHZ51/KCELO_BOV948)/PHZ51_001-(2N)-002/LH195	NA	NA	12.4	0.957393118843112	NA	NA	NA	NA	52.5	2.00760460548512	54.5	0.72757769012423	NA	NA	4.8753	0.637877044989775
GAH2_2016	(PHZ51/KCELO_BOV948)/PHZ51_003-(2N)-001/LH195	NA	NA	12.9724	0.479358421895472	NA	NA	NA	NA	53	1.00380220236233	53.7292	0.364296826040476	NA	NA	6.4557	0.313251246165644
GAH2_2016	(PHZ51/MISHC_ECU321)/PHZ51_004-(2N)-002/LH195	NA	NA	NA	0.479358421895472	NA	NA	NA	NA	55	1.00380220236233	56.7292	0.364296826040476	NA	NA	4.5092	0.318441845603272
GAH2_2016	(PHZ51/PISAN_BOV344)/PHZ51_001-(2N)-002/LH195	NA	NA	15.7276	0.478035667491629	NA	NA	NA	NA	53	1.00380220236233	54.2708	0.363289785084971	NA	NA	5.3896	0.317583908486708
GAH2_2016	(PHZ51/PISAN_BOV344)/PHZ51_001-(2N)-003/LH195	NA	NA	16.1	0.957393118843112	NA	NA	NA	NA	56	2.00760460548512	57	0.72757769012423	NA	NA	2.2181	0.636598926380368
GAH2_2016	(PHZ51/PISAN_BOV344)/PHZ51_001-(2N)-004/LH195	NA	NA	12.5724	0.479358421895472	NA	NA	NA	NA	53	1.00380220236233	53.7292	0.364296826040476	NA	NA	6.253	0.318890944529652
GAH2_2016	(PHZ51/PISAN_BOV344)/PHZ51_001-(2N)-005/LH195	NA	NA	12.0276	0.478035667491629	NA	NA	NA	NA	54	1.00380220236233	55.2708	0.363289785084971	NA	NA	4.8359	0.319525019171779
GAH2_2016	(PHZ51/PISAN_BOV344)/PHZ51_001-(2N)-006/LH195	NA	NA	NA	0.957393118843112	NA	NA	NA	NA	52	2.00760460548512	53	0.72757769012423	NA	NA	5.8188	0.637877044989775
GAH2_2016	(PHZ51/PISAN_BOV344)/PHZ51_002-(2N)-002/LH195	NA	NA	12.55	0.957393118843112	NA	NA	NA	NA	54	2.00760460548512	55.5	0.72757769012423	NA	NA	6.1332	0.632445040899796
GAH2_2016	(PHZ51/PISAN_BOV344)/PHZ51_003-(2N)-001/LH195	NA	NA	12.1724	0.479358421895472	NA	NA	NA	NA	55	1.00380220236233	55.7292	0.364296826040476	NA	NA	6.5897	0.31949865797546
GAH2_2016	(PIRA_TOL405/PHZ51)/PHZ51_002-(2N)-001/LH195	NA	NA	NA	0.478035667491629	NA	NA	NA	NA	53	1.00380220236233	54.2708	0.363289785084971	NA	NA	5.4627	0.315456895449898
GAH2_2016	(POJ_CHICO_BOV800/PHZ51)/PHZ51_001-(2N)-001/LH195	NA	NA	12.05	0.957393118843112	NA	NA	NA	NA	55	2.00760460548512	56	0.72757769012423	NA	NA	6.0824	0.638356339468303
GAH2_2016	(YUCATAN_TOL389_ICA/PHZ51)/PHZ51_005-(2N)-001/LH195	NA	NA	12.3724	0.479358421895472	NA	NA	NA	NA	53	1.00380220236233	53.7292	0.364296826040476	NA	NA	6.607	0.318441845603272
GAH2_2016	(YUCATAN_TOL389_ICA/PHZ51)/PHZ51_005-(2N)-002/LH195	NA	NA	NA	0.957393118843112	NA	NA	NA	NA	53	2.00760460548512	54	0.72757769012423	NA	NA	7.4181	0.616340746421268
GAH2_2016	(YUNGUENO_BOV362/PHZ51)/PHZ51_006-(2N)-002/LH195	NA	NA	NA	0.957393118843112	NA	NA	NA	NA	54	2.00760460548512	55	0.72757769012423	NA	NA	5.7821	0.637813139059305
GAH2_2016	2369/3IIH6	NA	NA	NA	0.479358421895472	NA	NA	NA	NA	52	1.00380220236233	52.7292	0.364296826040476	NA	NA	5.4936	0.318706384202454
GAH2_2016	B14A/H95	NA	NA	13.4	0.957393118843112	NA	NA	NA	NA	52	2.00760460548512	52	0.72757769012423	NA	NA	6.8217	0.633627300613497
GAH2_2016	B14A/MO17	NA	NA	NA	0.957393118843112	NA	NA	NA	NA	52	2.00760460548512	52	0.72757769012423	NA	NA	9.4994	0.637813139059305
GAH2_2016	B14A/OH43	NA	NA	12.1724	0.479358421895472	NA	NA	NA	NA	54	1.00380220236233	55.7292	0.364296826040476	NA	NA	4.0422	0.316844389059305
GAH2_2016	B37/H95	NA	NA	NA	0.478035667491629	NA	NA	NA	NA	53	1.00380220236233	58.2708	0.363289785084971	NA	NA	NA	0.317187116564417
GAH2_2016	B37/MO17	NA	NA	12.2724	0.479358421895472	NA	NA	NA	NA	51	1.00380220236233	57.7292	0.364296826040476	NA	NA	3.4419	0.318706384202454
GAH2_2016	B37/OH43	NA	NA	NA	0.478035667491629	NA	NA	NA	NA	51	1.00380220236233	52.2708	0.363289785084971	NA	NA	4.6795	0.317873913599182
GAH2_2016	B47/PHZ51	NA	NA	NA	0.479358421895472	NA	NA	NA	NA	50	1.00380220236233	51.7292	0.364296826040476	NA	NA	3.6723	0.317583908486708
GAH2_2016	B73/MO17	NA	NA	NA	0.957393118843112	NA	NA	NA	NA	52.5	2.00760460548512	54	0.72757769012423	NA	NA	7.5655	0.637301891615542
GAH2_2016	B73/PHM49	NA	NA	NA	0.479358421895472	NA	NA	NA	NA	53	1.00380220236233	53.7292	0.364296826040476	NA	NA	6.9811	0.318890944529652
GAH2_2016	B73/PHN82	NA	NA	16.1276	0.478035667491629	NA	NA	NA	NA	49	1.00380220236233	50.2708	0.363289785084971	NA	NA	8.3102	0.319089340490798
GAH2_2016	B73/PHZ51	NA	NA	NA	0.479358421895472	NA	NA	NA	NA	51	1.00380220236233	51.7292	0.364296826040476	NA	NA	6.9329	0.317583908486708
GAH2_2016	B73/TX777	NA	NA	12.35	0.957393118843112	NA	NA	NA	NA	53.5	2.00760460548512	55.5	0.72757769012423	NA	NA	3.6775	0.631134969325153
GAH2_2016	B97/B47	NA	NA	14.15	0.957393118843112	NA	NA	NA	NA	49.5	2.00760460548512	50.5	0.72757769012423	NA	NA	3.3293	0.628323108384458
GAH2_2016	BR105:N(PHZ51)(PHZ51)-(2N)-001/LH195	NA	NA	12.5724	0.479358421895472	NA	NA	NA	NA	58	1.00380220236233	60.7292	0.364296826040476	NA	NA	2.2971	0.316844389059305
GAH2_2016	BR105:N(PHZ51)(PHZ51)-(2N)-003/LH195	NA	NA	12.9724	0.479358421895472	NA	NA	NA	NA	53	1.00380220236233	54.7292	0.364296826040476	NA	NA	4.7039	0.318204594836401
GAH2_2016	CG108/CGR03	NA	NA	NA	0.957393118843112	NA	NA	NA	NA	45.5	2.00760460548512	46	0.72757769012423	NA	NA	5.7052	0.639059304703476
GAH2_2016	CG44/CGR01	NA	NA	NA	0.957393118843112	NA	NA	NA	NA	44	2.00760460548512	45	0.72757769012423	NA	NA	5.9253	0.638707822085889
GAH2_2016	CG60/LH162	NA	NA	NA	0.479358421895472	NA	NA	NA	NA	44	1.00380220236233	44.7292	0.364296826040476	NA	NA	3.7355	0.319432515337423
GAH2_2016	CUBA164:N(PHZ51)(PHZ51)-(2N)-002/LH195	NA	NA	13.4724	0.479358421895472	NA	NA	NA	NA	53	1.00380220236233	55.7292	0.364296826040476	NA	NA	6.9335	0.316844389059305
GAH2_2016	F42/H95	NA	NA	12.9	0.957393118843112	NA	NA	NA	NA	51.5	2.00760460548512	53.5	0.72757769012423	NA	NA	6.5007	0.633755112474438
GAH2_2016	F42/MO17	NA	NA	NA	0.479358421895472	NA	NA	NA	NA	52	1.00380220236233	56.7292	0.364296826040476	NA	NA	4.2794	0.31949865797546
GAH2_2016	F42/OH43	NA	NA	13.8276	0.478035667491629	NA	NA	NA	NA	50	1.00380220236233	55.2708	0.363289785084971	NA	NA	2.1683	0.319089340490798
GAH2_2016	GEMN-0262/3IIH6	NA	NA	12.7276	0.478035667491629	NA	NA	NA	NA	50	1.00380220236233	50.2708	0.363289785084971	NA	NA	8.0935	0.315985972648262
GAH2_2016	GEMN-0268/3IIH6	NA	NA	14.1276	0.478035667491629	NA	NA	NA	NA	51	1.00380220236233	52.2708	0.363289785084971	NA	NA	2.4397	0.317583908486708
GAH2_2016	GEMN-0269/3IIH6	NA	NA	12.65	0.957393118843112	NA	NA	NA	NA	49.5	2.00760460548512	50.5	0.72757769012423	NA	NA	5.4566	0.637301891615542
GAH2_2016	LH123HT/3IIH6	NA	NA	14	0.957393118843112	NA	NA	NA	NA	52.5	2.00760460548512	53.5	0.72757769012423	NA	NA	5.444	0.633755112474438
GAH2_2016	LH198/PHZ51	NA	NA	12.3724	0.479358421895472	NA	NA	NA	NA	52	1.00380220236233	54.7292	0.364296826040476	NA	NA	3.4137	0.319221146472393
GAH2_2016	LH212HT/LH195	NA	NA	12.75	0.957393118843112	NA	NA	NA	NA	53.5	2.00760460548512	53	0.72757769012423	NA	NA	3.6432	0.637301891615542
GAH2_2016	LH216/LH195	NA	NA	12.0724	0.479358421895472	NA	NA	NA	NA	56	1.00380220236233	57.7292	0.364296826040476	NA	NA	7.2697	0.314413503323108
GAH2_2016	LH74/PHN82	NA	NA	12.2724	0.479358421895472	NA	NA	NA	NA	50	1.00380220236233	49.7292	0.364296826040476	NA	NA	7.4716	0.317187084611452
GAH2_2016	LH82/LH195	NA	NA	12.25	0.957393118843112	NA	NA	NA	NA	51	2.00760460548512	51	0.72757769012423	NA	NA	6.9572	0.638707822085889
GAH2_2016	PB80/PHZ51	NA	NA	13.55	0.957393118843112	NA	NA	NA	NA	50.5	2.00760460548512	52.5	0.72757769012423	NA	NA	5.7195	0.638707822085889
GAH2_2016	PHG29/PHG47	NA	NA	NA	0.957393118843112	NA	NA	NA	NA	47	2.00760460548512	47	0.72757769012423	NA	NA	7.108	0.638899539877301
GAH2_2016	PHG39/PHN82	NA	NA	12.3276	0.478035667491629	NA	NA	NA	NA	52	1.00380220236233	54.2708	0.363289785084971	NA	NA	9.8605	0.319353431748466
GAH2_2016	PHG39/TX205	NA	NA	NA	0.957393118843112	NA	NA	NA	NA	55.5	2.00760460548512	58.5	0.72757769012423	NA	NA	3.8799	0.635768149284254
GAH2_2016	PHG80/PHZ51	NA	NA	NA	0.957393118843112	NA	NA	NA	NA	50	2.00760460548512	52	0.72757769012423	NA	NA	7.5962	0.639059304703476
GAH2_2016	PHN11_OH43_0001/B47	NA	NA	NA	0.479358421895472	NA	NA	NA	NA	50	1.00380220236233	49.7292	0.364296826040476	NA	NA	6.7481	0.303781601482618
GAH2_2016	PHN11_PHG47_0251/B47	NA	NA	NA	0.957393118843112	NA	NA	NA	NA	49.5	2.00760460548512	49.5	0.72757769012423	NA	NA	4.4407	0.637301891615542
GAH2_2016	PHP02/B47	NA	NA	NA	0.478035667491629	NA	NA	NA	NA	48	1.00380220236233	50.2708	0.363289785084971	NA	NA	4.766	0.31949865797546
GAH2_2016	PHW52/PHM49	NA	NA	12.2241	1.424904158781	NA	NA	NA	NA	52.6667	3.01140690822768	54.9097	1.08320123861835	NA	NA	4.5752	0.934432515337423
GAH2_2016	PHW52/PHN82	NA	NA	NA	1.42097345562188	NA	NA	NA	NA	50.6667	3.01140690822768	51.7569	1.08017842002433	NA	NA	8.103	0.958397239263804
GAH2_2016	PHW52/TX205	NA	NA	12.5724	0.479358421895472	NA	NA	NA	NA	53	1.00380220236233	53.7292	0.364296826040476	NA	NA	9.7103	0.31949865797546
GAH2_2016	REDEAR-B/LH195	NA	NA	12.15	0.957393118843112	NA	NA	NA	NA	54	2.00760460548512	56	0.72757769012423	NA	NA	4.6268	0.632572852760736
GAH2_2016	TX714/PHZ51	NA	NA	13.2	0.957393118843112	NA	NA	NA	NA	53.5	2.00760460548512	58	0.72757769012423	NA	NA	NA	0.637877044989775
GAH2_2016	TX714/TX777	NA	NA	13.4	0.957393118843112	NA	NA	NA	NA	56	2.00760460548512	59.5	0.72757769012423	NA	NA	5.9932	0.636598926380368
GAH2_2016	VA35/LH195	NA	NA	14.0724	0.479358421895472	NA	NA	NA	NA	54	1.00380220236233	53.7292	0.364296826040476	NA	NA	9.312	0.319221146472393
GAH2_2016	W10005_0107/B47	NA	NA	12.4724	0.479358421895472	NA	NA	NA	NA	49	1.00380220236233	49.7292	0.364296826040476	NA	NA	7.5682	0.315985972648262
GAH2_2016	W37A/B47	NA	NA	NA	0.479358421895472	NA	NA	NA	NA	47	1.00380220236233	46.7292	0.364296826040476	NA	NA	9.6401	0.319221146472393
GAH2_2016	WF9/H95	NA	NA	13.2276	0.478035667491629	NA	NA	NA	NA	53	1.00380220236233	56.2708	0.363289785084971	NA	NA	4.3735	0.318204562883436
IAH1_2016	((ARIZONA-LIB_16/PHZ51_B)/PHZ51)-(2N)-002PVP/LH195	127.4595	0.0225545850627755	17.8077	14.8493110905086	0.0967742	311.558887847548	237.7994	0.0200896697428275	83	1.82494509516837	84.5022	0.997615941728509	732.4019	0.0193040137727856	11.9919	2.03066717938858
IAH1_2016	((ARIZONA-LIB_16/PHZ51_B)/PHZ51)-(2N)-003/LH195	132.6374	0.0241799092526232	17.1871	22.7196720940778	0.0524887	311.558887847548	245.8635	0.0223503382400506	81.5	1.82494509516837	84.6798	1.07022633768634	NA	NA	11.3547	2.59546241107479
IAH1_2016	((CHIRIMITO-VEN_703/PHZ51_B)/PHZ51)-(2N)-001/LH195	125.6976	0.0234939828301838	17.6677	19.9174998601592	0.0140845	311.558887847548	234.1208	0.0214264577354777	84	1.82494509516837	86.105	1.03994654307585	NA	NA	10.8659	2.31647760046145
IAH1_2016	((JORA-ANC1/PHZ51B)/PHZ51)-(2N)-002/LH195	127.204	0.0120442161437521	17.2992	11.6055988698481	0.0200724	155.780068728522	236.3826	0.0110944887173029	81.7002	0.912473279648609	83.4071	0.53299501299829	NA	NA	14.2779	1.28465679676985
IAH1_2016	((PHZ51/JALA-JAL44)/PHZ51)-(2N)-001/LH195	124.2617	0.0225953930237954	17.1842	16.3839898314888	0.0169492	311.558887847548	237.5258	0.0202032193020487	80	1.82494509516837	83.4536	0.999587834244562	NA	NA	11.9781	2.0814266487214
IAH1_2016	((TUXPENO-GUA_456/PHZ51_B)/PHZ51)-(2N)-002/LH195	130.8143	0.0233276779499343	18.6188	19.7967011845411	0.0514706	311.558887847548	228.9374	0.0211529065246265	82.5	1.82494509516837	83.8014	1.03211833938213	NA	NA	11.5886	2.25504710632571
IAH1_2016	(ALTIPLANO_BOV903/PHZ51)/PHZ51_002-(2N)-003/LH195	125.5727	0.0228238211864188	17.3028	17.9650838271401	0.0630252	311.558887847548	247.1115	0.0204956954394368	80.5	1.82494509516837	83.1393	1.00972452871146	NA	NA	10.5799	2.07979234762546
IAH1_2016	(CHANDELLE_CUB68_CI/PHZ51)/PHZ51_004-(2N)-001/LH195	132.3884	0.0231737038851221	16.942	17.7931093579104	0.0381841	311.558887847548	246.945	0.0210135502474004	78.5	1.82494509516837	82.6635	1.02536575462248	NA	NA	11.6089	2.28206114208806
IAH1_2016	(CML442-B/CML343-B-B-B-B-B-B)-B-B-1-1-B-B-B-1-B12-1-B19/LH19	138.7597	0.0120433499187914	22.8879	10.8093987320305	0.3755617	155.78567635114	234.0011	0.0110842193639848	87.2998	0.912509882869693	89.1649	0.532940518295605	NA	NA	13.5229	1.28215727744664
IAH1_2016	(KARAPAMPA_BOV978/PHZ51)/PHZ51_003-(2N)-001/LH195	128.2221	0.02302226404393	17.0833	18.0882627722284	0.0350877	311.558887847548	239.0289	0.0207348376929482	77	1.82494509516837	81.2671	1.01848084176982	NA	NA	10.7828	2.13814651028648
IAH1_2016	(KARAPAMPA_BOV978/PHZ51)/PHZ51_003-(2N)-002/LH195	144.6679	0.0119796437134239	17.9694	11.5210993036522	0.0953637	155.780068728522	255.7342	0.0110270918925615	78.7002	0.912473279648609	83.8832	0.530133304692458	NA	NA	9.3695	1.2652374543357
IAH1_2016	(KARAPAMPA_BOV978/PHZ51)/PHZ51_003-(2N)-006/LH195	117.4145	0.0120455051689912	17.4489	11.5597786825447	0.1204507	155.780068728522	212.7399	0.0110997309219536	81.7002	0.912473279648609	82.8982	0.533062989758395	NA	NA	10.6491	1.27802345702749
IAH1_2016	(KARAPAMPA_BOV978/PHZ51)/PHZ51_003-(2N)-007/LH195	116.5569	0.0114984248111578	18.4851	9.76505550193337	0	155.780068728522	242.2485	0.0104030716876217	78.7002	0.912473279648609	82.4604	0.508803670201232	NA	NA	9.6183	1.10026917900404
IAH1_2016	(ONAVENO_SON24/PHZ51)/PHZ51_004-(2N)-001/LH195	134.8362	0.0232703730439042	16.6303	17.8770138567387	0.0592105	311.558887847548	248.0739	0.0211064544322178	82	1.82494509516837	83.5762	1.0295787276246	NA	NA	12.6493	2.29542395693136
IAH1_2016	(PHZ51/KCELO_BOV948)/PHZ51_001-(2N)-002/LH195	126.099	0.0114276702157828	18.1275	8.87007418109804	0	155.780068728522	234.5155	0.010303265065962	80.7002	0.912473279648609	82.7512	0.50567662594179	NA	NA	10.8867	1.09363583926168
IAH1_2016	(PHZ51/KCELO_BOV948)/PHZ51_003-(2N)-001/LH195	127.4708	0.011999229162907	17.8153	11.5169338320791	0	155.780068728522	228.6231	0.0110533442065639	76.7002	0.912473279648609	79.7552	0.531062320413897	NA	NA	9.3697	1.18977119784657
IAH1_2016	(PHZ51/MISHC_ECU321)/PHZ51_004-(2N)-002/LH195	99.3156	0.011975660625435	17.7159	11.5026522152573	0.0506969	155.78567635114	219.0945	0.0110229094837968	81.2998	0.912509882869693	82.5213	0.529972313065609	NA	NA	9.2974	1.16054604883676
IAH1_2016	(PHZ51/PISAN_BOV344)/PHZ51_001-(2N)-002/LH195	103.2563	0.0227805125164351	18.4707	17.6020927329183	0.111039	311.558887847548	212.047	0.0203976299110184	77.5	1.82494509516837	80.6741	1.00769349641411	NA	NA	11.2282	2.10103826187272
IAH1_2016	(PHZ51/PISAN_BOV344)/PHZ51_001-(2N)-003/LH195	147.1526	0.0112011420763619	18.1011	8.81116251170795	0.0802122	155.780068728522	254.1676	0.00998910956500196	81.7002	0.912473279648609	82.7142	0.495549788105109	NA	NA	11.3861	1.02268794462603
IAH1_2016	(PHZ51/PISAN_BOV344)/PHZ51_001-(2N)-004/LH195	115.1371	0.0119469256748047	18.0241	11.3657867207147	0.0078216	155.780068728522	222.8052	0.0109684899973161	78.7002	0.912473279648609	82.4226	0.528688458656421	NA	NA	9.7036	1.2309171313209
IAH1_2016	(PHZ51/PISAN_BOV344)/PHZ51_001-(2N)-006/LH195	122.9059	0.0122334115341978	18.1475	12.4404783865581	0.006847	155.780068728522	218.1832	0.0113719952378003	76.7002	0.912473279648609	79.9513	0.541446563582176	NA	NA	8.8985	1.34281868871371
IAH1_2016	(PHZ51/PISAN_BOV344)/PHZ51_002-(2N)-002/LH195	128.586	0.0119686637964371	17.5601	10.1429232803446	0.0285188	155.780068728522	224.4848	0.011002728630317	76.7002	0.912473279648609	79.8963	0.529640586476296	NA	NA	9.0399	1.17275523937704
IAH1_2016	(PHZ51/PISAN_BOV344)/PHZ51_003-(2N)-001/LH195	118.0823	0.0118432029699142	18.3096	10.0947228235709	0.0674281	155.780068728522	219.9058	0.0108113322460103	81.7002	0.912473279648609	85.93	0.524017095701988	NA	NA	10.9781	1.20813305133628
IAH1_2016	(PIRA_TOL405/PHZ51)/PHZ51_002-(2N)-001/LH195	119.0885	0.0232147593389879	18.225	19.0469163013945	0.0214286	311.558887847548	219.4035	0.0210582818919421	80	1.82494509516837	81.6606	1.0271910439259	NA	NA	11.0703	2.24706787156316
IAH1_2016	(POJ_CHICO_BOV800/PHZ51)/PHZ51_001-(2N)-001/LH195	113.0892	0.0119465776379902	19.6792	10.6237377133465	0.0393031	155.780068728522	214.7362	0.0109964610387376	76.7002	0.912473279648609	84.0013	0.528674410125999	NA	NA	7.8897	1.26898673332052
IAH1_2016	(YUCATAN_TOL389_ICA/PHZ51)/PHZ51_005-(2N)-001/LH195	136.6316	0.0116574595890588	17.4825	9.26519891316896	0.0470605	155.78567635114	241.038	0.0106055425948483	81.2998	0.912509882869693	83.6245	0.515814113470887	NA	NA	11.4202	1.13660834454913
IAH1_2016	(YUCATAN_TOL389_ICA/PHZ51)/PHZ51_005-(2N)-002/LH195	131.9074	0.0118855912758772	17.9234	11.4264835922075	0	155.780068728522	218.4425	0.0109121590932552	79.7002	0.912473279648609	79.2678	0.52597539286602	NA	NA	9.6394	1.22534128052298
IAH1_2016	(YUNGUENO_BOV362/PHZ51)/PHZ51_004-(2N)-001/LH195	117.5744	0.0232014540204697	16.9639	17.7829932126616	0.0327869	311.558887847548	232.321	0.0210169911431344	80.5	1.82494509516837	82.1844	1.02653722078829	NA	NA	9.8614	2.20919054028072
IAH1_2016	(YUNGUENO_BOV362/PHZ51)/PHZ51_006-(2N)-002/LH195	108.5568	0.0230314444816829	17.5529	18.8410229922129	0.0874496	311.558887847548	215.4296	0.0207864511289579	77.5	1.82494509516837	81.8475	1.01903507895387	NA	NA	10.1961	2.22428379157854
IAH1_2016	2369/3IIH6	133.49	0.0229716053520328	16.1402	20.4274725941724	0.0220588	311.558887847548	233.215	0.0207004287356085	76.5	1.82494509516837	79.3613	1.02680538910691	NA	NA	12.5996	2.28648336858296
IAH1_2016	2369/LH123HT	145.3343	0.0246017994792338	17.6151	25.255254147322	0.0344395	311.558887847548	251.7769	0.0228888384224181	78.5	1.82494509516837	83.4525	1.08889003694084	NA	NA	12.7379	2.75995000961354
IAH1_2016	2FACC/3IIH6	110.7742	0.024434097295625	16.0555	24.4786912326344	0.0065789	311.558887847548	211.5297	0.0226324916902368	74.5	1.82494509516837	75.7849	1.08137078762179	NA	NA	10.9816	2.68169582772544
IAH1_2016	4N506/3IIH6	127.5152	0.0240501946428111	15.9225	22.0317742171591	0.028169	311.558887847548	228.2402	0.022140443600278	76	1.82494509516837	77.7056	1.06437886348748	NA	NA	13.7201	2.55825802730244
IAH1_2016	6F629/3IIH6	92.1351	0.024662167109232	16.5761	25.4992317680285	0.0069444	311.558887847548	213.9246	0.0229473336498957	76	1.82494509516837	76.7934	1.09154747508255	NA	NA	11.2059	2.76350701788118
IAH1_2016	78010/3IIH6	105.8934	0.0242668308025471	16.2966	24.3138575718157	0.0064935	311.558887847548	197.8655	0.0224294788419321	74.5	1.82494509516837	75.6273	1.07397808837115	NA	NA	11.5551	2.6348779080946
IAH1_2016	A632/3IIH6	118.7182	0.0242111552244193	16.1206	24.3144526391833	0.062917	311.558887847548	222.5108	0.0223606609272526	74.5	1.82494509516837	75.9761	1.0714918383703	NA	NA	10.9338	2.62353393578158
IAH1_2016	A634/3IIH6	106.0817	0.0246595349196937	16.1577	25.5039923069691	0.0137089	311.558887847548	209.1661	0.0229456132020288	74.5	1.82494509516837	75.9037	1.09143010187677	NA	NA	10.0384	2.7722553355124
IAH1_2016	A635/3IIH6	102.4347	0.0235036737219315	17.3752	20.0876891272861	0.0384127	311.558887847548	206.0536	0.0214144146004088	73	1.82494509516837	75.7142	1.04006278333563	NA	NA	9.167	2.39482791770813
IAH1_2016	A679/3IIH6	105.0471	0.0244557194049859	16.0407	24.4786912326344	0.0520422	311.558887847548	204.4345	0.0226548575125077	74.5	1.82494509516837	75.6046	1.08232971311768	NA	NA	12.2943	2.68304172274563
IAH1_2016	A680/3IIH6	113.6642	0.0242503415916884	16.6087	24.3293293233727	0.2439944	311.558887847548	224.3375	0.0224157152589962	77.5	1.82494509516837	77.9345	1.07325617517883	NA	NA	12.4165	2.63507017881177
IAH1_2016	B104/3IIH6	107.7572	0.023779391064477	17.008	21.6830647397592	0.0425553	311.558887847548	211.0121	0.0218204402970181	77	1.82494509516837	78.9611	1.05236589714708	NA	NA	12.5808	2.4955777735051
IAH1_2016	B105/3IIH6	107.6199	0.0241874887210292	17.0569	24.1329570920724	0.0608108	311.558887847548	217.563	0.0223503382400506	76.5	1.82494509516837	79.2808	1.07048102394753	NA	NA	9.8635	2.62372620649875
IAH1_2016	B109/3IIH6	113.9974	0.0246382041300369	16.2429	25.3427290503558	0.0215043	311.558887847548	213.7823	0.0229284087233589	78	1.82494509516837	79.4569	1.09049066305212	NA	NA	11.6396	2.76744856758316
IAH1_2016	B110/3IIH6	111.1016	0.0245788110031194	16.5709	25.3576057345452	0.1047787	311.558887847548	225.4775	0.0228578703608123	77.5	1.82494509516837	80.5822	1.08781079257957	NA	NA	12.6011	2.75870024995193
IAH1_2016	B111/3IIH6	124.6385	0.0242130604037227	16.7904	24.3102871676102	0.0961859	311.558887847548	231.652	0.0223709836144545	76.5	1.82494509516837	78.271	1.07160128095407	NA	NA	12.1228	2.62074601038262
IAH1_2016	B119/3IIH6	124.576	0.0242460414034907	15.9838	24.2031750414464	0.0284708	311.558887847548	216.6921	0.0224174357068632	77	1.82494509516837	78.9283	1.07276957487108	NA	NA	11.728	2.63382041915016
IAH1_2016	B14/3IIH6	109.0323	0.0246704091366109	15.6135	25.5039923069691	0.0333621	311.558887847548	222.6341	0.0229576563370977	77	1.82494509516837	77.9319	1.09185201096782	NA	NA	8.6451	2.7258219573159
IAH1_2016	B14A/H95	133.6907	0.024379929877027	17.3817	25.1874164674183	0.0925439	311.558887847548	229.3429	0.0225808782542271	79.5	1.82494509516837	82.5839	1.08877073772685	NA	NA	11.6461	2.75543164776005
IAH1_2016	B14A/MO17	134.5837	0.0241254737167754	16.9021	22.4810500796795	0.0678426	311.558887847548	239.2435	0.0222299068893614	80.5	1.82494509516837	82.5493	1.06952810306546	NA	NA	11.2664	2.58479138627187
IAH1_2016	B14A/OH43	105.7713	0.0238873546624043	19.0939	22.7410945193105	0.1638796	311.558887847548	223.9881	0.0219683988135791	77.5	1.82494509516837	80.3979	1.05711135477003	NA	NA	11.7699	2.51249759661604
IAH1_2016	B37/H95	124.0571	0.023788867978035	18.5366	20.4000994952639	0.0660025	311.558887847548	238.9854	0.0217653859652745	77.5	1.82494509516837	83.6244	1.06293617004885	NA	NA	8.6574	2.52547587002499
IAH1_2016	B37/MO17	128.7613	0.0232990925262317	18.7576	22.2573047494707	0.0942342	311.558887847548	236.6793	0.0211305407023556	78	1.82494509516837	85.6152	1.04765170883378	NA	NA	9.8178	2.43376273793501
IAH1_2016	B37/OH43	103.1296	0.0232102889994586	17.9614	19.0844055455518	0.125489	311.558887847548	216.2027	0.0209653777071247	74.5	1.82494509516837	77.3266	1.0379744239706	NA	NA	9.3138	2.33964622188041
IAH1_2016	B47/3IIH6	102.6998	0.0487096857356467	16.3556	48.0552603360226	0.1888284	621.462043111528	221.0719	0.0450963794895087	75.25	3.63964128843338	76.2779	1.62249196911227	NA	NA	11.1537	5.3409921169006
IAH1_2016	B47/LH123HT	114.3839	0.0245915207919771	16.8689	25.1356456064391	0.0821918	311.558887847548	233.593	0.0228853975266841	77	1.82494509516837	81.8026	1.08842632214232	NA	NA	11.0205	2.76187271678523
IAH1_2016	B47/LH162	95.0499	0.0243300910051819	16.163	23.5902556528425	0.2050662	311.558887847548	190.5571	0.0225103398916806	74.5	1.82494509516837	74.2931	1.07677408580888	NA	NA	9.767	2.65920015381657
IAH1_2016	B47/LH185	93.7406	0.0479800974503081	16.7494	44.263491069824	0.3493911	621.462043111528	210.7102	0.044136369579729	75.25	3.63964128843338	77.1342	2.123480691088	NA	NA	11.1289	5.07892712939819
IAH1_2016	B47/PHK05	90.6978	0.0243719224522416	16.2958	25.1832509958452	0.2097222	311.558887847548	202.0059	0.0225722760148922	70	1.82494509516837	70.0422	1.08917100754927	NA	NA	8.3627	2.7588925206691
IAH1_2016	B47/PHK56	94.344	0.0483100879115213	16.789	45.8160218318316	0.0269381	621.462043111528	217.1949	0.0445819655772791	74	3.63964128843338	75.4226	2.13832228371098	NA	NA	12.2372	5.20765237454336
IAH1_2016	B47/PHK76	98.0773	0.0242470236407229	16.5004	24.3263539865348	0.0695423	311.558887847548	203.7082	0.0224122743632622	76	1.82494509516837	77.3764	1.0731084390202	NA	NA	10.3147	2.63555085560469
IAH1_2016	B47/PHW03	95.482	0.0241977777204878	16.4799	24.2061503782843	0.0827703	311.558887847548	206.4436	0.0223623813751196	74.5	1.82494509516837	74.5417	1.07093567517804	NA	NA	10.7851	2.62862910978658
IAH1_2016	B47/PHZ51	115.6775	0.0727422722936915	16.4447	71.0480683518181	0.0230423	929.678225554514	232.8451	0.0672488662248557	76.5	5.4439055636896	78.3226	3.21960594778524	NA	NA	9.1688	7.79004037685061
IAH1_2016	B73/3IIH6	117.3776	0.024645347907912	15.7725	25.3760528229401	0.086961	311.558887847548	209.291	0.0229335700669598	76	1.82494509516837	78.0008	1.09081933068722	NA	NA	13.4341	2.76889059796193
IAH1_2016	B73/MO17	141.7767	0.0240777153316662	17.3825	23.1695430239657	0.1844064	311.558887847548	239.9138	0.0221696912140168	80.5	1.82494509516837	82.9374	1.06629082316004	NA	NA	12.8487	2.55777735050952
IAH1_2016	B73/PHM49	130.755	0.0122911598649102	17.6097	21.7056772997271	0.0810811	311.558887847548	231.6815	0.0114324466145027	79.5	1.82494509516837	82.783	1.05287651591007	NA	NA	12.5303	2.48413766583349
IAH1_2016	B73/PHN82	111.3049	0.0235747918224239	17.4642	22.2293365831946	0.0367647	311.558887847548	216.3448	0.0215468890861669	77	1.82494509516837	79.269	1.04490703384993	NA	NA	14.1183	2.42751393962699
IAH1_2016	B84/3IIH6	117.4319	0.0242277527133981	16.6298	22.7410945193105	0.1625245	311.558887847548	226.6465	0.0223985107803263	77	1.82494509516837	80.0388	1.07227447746831	NA	NA	13.4135	2.63410882522592
IAH1_2016	B97/B47	98.3854	0.0233148933976127	17.6408	20.5351797877038	0.4388889	311.558887847548	220.2787	0.0212096813042371	74.5	1.82494509516837	76.9569	1.03172600018172	NA	NA	9.414	2.34358777158239
IAH1_2016	BR105:N(PHZ51)(PHZ51)-(2N)-001/LH195	119.4926	0.0118384438887313	18.4881	11.5568033457068	0.0273635	155.78567635114	234.9207	0.0108498135034512	79.2998	0.912509882869693	83.5593	0.52591727273613	NA	NA	9.1534	1.23880023072486
IAH1_2016	BR105:N(PHZ51)(PHZ51)-(2N)-003/LH195	114.6187	0.0116436670190002	17.7942	9.53059895910816	0.0044546	155.780068728522	230.4468	0.0105520865591731	79.7002	0.912473279648609	82.0235	0.515141030251244	NA	NA	11.3093	1.14776004614497
IAH1_2016	BSSSC0_001/3IIH6	115.3064	0.0246150377684395	16.1702	25.3742676208374	0.1612903	311.558887847548	222.144	0.0228991611096201	78.5	1.82494509516837	80.7962	1.08945650994171	NA	NA	9.4219	2.75725821957316
IAH1_2016	BSSSC0_002/3IIH6	118.434	0.0232534507205651	16.2681	19.3355239746692	0.0815713	311.558887847548	223.9481	0.021072045474878	76	1.82494509516837	80.7999	1.02890405828056	NA	NA	8.0423	2.28667563930013
IAH1_2016	BSSSC0_003/3IIH6	101.109	0.0244217458557839	15.6524	23.5533614760527	0.0774648	311.558887847548	197.9514	0.0226170076594339	77	1.82494509516837	78.4848	1.08082561400575	NA	NA	10.8658	2.67698519515478
[truncated: 15,656 more rows]
